# Supplementary material for: Reconstruction and Analysis of a Genome-Scale Metabolic Model of Ganoderma lucidum for Improved Extracellular Polysaccharide Production
Source: Front Microbiol. 2018 Dec 11;9:3076. doi: 10.3389/fmicb.2018.03076 (PMC6298397; doi:10.3389/fmicb.2018.03076)
Supplement: Supplementary file 2 [file Table_2.xlsx]

## Sheet: reactions
Supplementary Table S2. Detailed information about model iZBM1060.
Rxn name	Rxn description	Formula	Gene-reaction association	Genes	Proteins	Subsystem	Reversible	LB	UB	Objective	Confidence Score	EC Number	Notes	References
GL0001	Alcohol dehydrogenase (ethanol) NADP dependent	eth[c] + nadp[c] <=> acal[c] + h[c] + nadph[c]	(GL25699-R1)	GL25699-R1	ADH2	Carbohydrate metabolism: Glycolysis/Gluconeogenesis	1	-1000	1000	0		1.1.1.2
GL0002	Glyceraldehyde-3-phosphate dehydrogenase	ga3p[c] + nad[c] + pi[c] <=> 13pdg[c] + h[c] + nadh[c]	(GL18551-R1) or (GL21313-R1)	GL18551-R1 GL21313-R1	(GADPH1 or GADPH2)	Carbohydrate metabolism: Glycolysis/Gluconeogenesis	1	-1000	1000	0		1.2.1.12
GL0003	Aldehyde Dehydrogenase	acal[c] + nad[c] + h2o[c] -> ac[c] + nadh[c] + 2 h[c]	(GL30174-R1) or (GL24130-R1)	GL30174-R1 GL24130-R1	(ALD1.1 or ALD1.2)	Carbohydrate metabolism: Glycolysis/Gluconeogenesis	0	0	1000	0		1.2.1.3
GL0004	Aldehyde Dehydrogenase Mitochondrial	acal[m] + nadp[m] + h2o[m] -> ac[m] + nadph[m] + 2 h[m]	(GL23433-R1 and GL20614-R1) or (GL23433-R1 and GL20474-R1)	GL23433-R1 GL20614-R1 GL20474-R1	(AL3B1 and (AL3A1.1 or AL3A1.2))	Carbohydrate metabolism: Glycolysis/Gluconeogenesis	0	0	1000	0		1.2.1.5
GL0005	Aldehyde Dehydrogenase Mitochondrial	acal[m] + nad[m] + h2o[m] -> ac[m] + nadh[m] + 2 h[m]	(GL23433-R1 and GL20614-R1) or (GL23433-R1 and GL20474-R1)	GL23433-R1 GL20614-R1 GL20474-R1	(AL3B1 and (AL3A1.1 or AL3A1.2))	Carbohydrate metabolism: Glycolysis/Gluconeogenesis	0	0	1000	0		1.2.1.5
GL0006	Pyruvate dehydrogenase, mitochondrial	pyr[m] + coa[m] + nad[m] -> accoa[m] + co2[m] + nadh[m]	(GL24484-R1 and GL21912-R1 and GL29739-R1) or (GL31574-R1 and GL21912-R1 and GL29739-R1)	GL24484-R1 GL31574-R1 GL21912-R1 GL29739-R1	((PDHA or PDHB) and DLD and DLAT )	Carbohydrate metabolism: Glycolysis/Gluconeogenesis	0	0	1000	0		1.2.4.1 1.8.1.4 2.3.1.12
GL0007	Hexokinase (D-glucose:ATP)	glc[c] + atp[c] -> g6p[c] + adp[c] + h[c]	(GL26783-R1) or (GL20491-R1) or (GL20491-R2)	GL26783-R1 GL20491-R1 GL20491-R2	(HK2.1 or HK2.2 or HK2.3)	Carbohydrate metabolism: Glycolysis/Gluconeogenesis	0	0	1000	0		2.7.1.1
GL0008	Hexokinase (D-mannose:ATP)	man[c] + atp[c] -> man6p[c] + adp[c] + h[c]	(GL26783-R1) or (GL20491-R1) or (GL20491-R2)	GL26783-R1 GL20491-R1 GL20491-R2	(HK2.1 or HK2.2 or HK2.3)	Carbohydrate metabolism: Glycolysis/Gluconeogenesis	0	0	1000	0		2.7.1.1
GL0009	Hexokinase (D-fructose:ATP)	fru[c] + atp[c] -> f6p[c] + adp[c] + h[c]	(GL26783-R1) or (GL20491-R1) or (GL20491-R2)	GL26783-R1 GL20491-R1 GL20491-R2	(HK2.1 or HK2.2 or HK2.3)	Carbohydrate metabolism: Glycolysis/Gluconeogenesis	0	0	1000	0		2.7.1.1
GL0010	Phosphofructokinase	f6p[c] + atp[c] -> fdp[c] + adp[c] + h[c]	(GL26108-R1)	GL26108-R1	PFK1	Carbohydrate metabolism: Glycolysis/Gluconeogenesis	0	0	1000	0		2.7.1.11
GL0011	Pyruvate kinase	pep[c] + adp[c] + h[c] -> pyr[c] + atp[c]	(GL30680-R1)	GL30680-R1	PK	Carbohydrate metabolism: Glycolysis/Gluconeogenesis	0	0	1000	0		2.7.1.40
GL0012	Fructose-1,6-bisphosphatase	fdp[c] + h2o[c] -> f6p[c] + pi[c]	(GL24591-R1) or (GL24591-R2)	GL24591-R1 GL24591-R2	(FBP1 or FBP2)	Carbohydrate metabolism: Glycolysis/Gluconeogenesis	0	0	1000	0		3.1.3.11
GL0013	Phosphoenolpyruvate carboxykinase	oaa[c] + atp[c] -> pep[c] + adp[c] + co2[c]	(GL25620-R1)	GL25620-R1	PCK1	Carbohydrate metabolism: Glycolysis/Gluconeogenesis	0	0	1000	0		4.1.1.49
GL0014	Fructose-bisphosphate aldolase	fdp[c] <=> t3p2[c] + ga3p[c]	(GL23682-R1) or (GL25136-R1)	GL23682-R1 GL25136-R1	(FBA1.1 or FBA1.2)	Carbohydrate metabolism: Glycolysis/Gluconeogenesis	1	-1000	1000	0		4.1.2.13
GL0015	D-Fructose 1-phosphate D-glyceraldehyde-3-phosphate-lyase	f1p[c] <=> t3p2[c] + glyal[c]	(GL23682-R1) or (GL25136-R1)	GL23682-R1 GL25136-R1	(FBA1.1 or FBA1.2)	Carbohydrate metabolism: Glycolysis/Gluconeogenesis	1	-1000	1000	0		4.1.2.13
GL0016	Enolase	2pg[c] <=> pep[c] + h2o[c]	(GL30114-R1)	GL30114-R1	ENO	Carbohydrate metabolism: Glycolysis/Gluconeogenesis	1	-1000	1000	0		4.2.1.11
GL0017	UDP-glucose 4-epimerase	udpglac[c] <=> udpglc[c]	(GL30389-R1) or (GL29575-R1)	GL30389-R1 GL29575-R1	(GALE1.1 or GALE1.2)	Carbohydrate metabolism: Glycolysis/Gluconeogenesis	1	-1000	1000	0		5.1.3.2
GL0018	Triose-phosphate isomerase	t3p2[c] <=> ga3p[c]	(GL22268-R1)	GL22268-R1	TPI	Carbohydrate metabolism: Glycolysis/Gluconeogenesis	1	-1000	1000	0		5.3.1.1
GL0019	Glucose-6-phosphate isomerase	g6p[c] <=> f6p[c]	(GL22245-R1)	GL22245-R1	GPI	Carbohydrate metabolism: Glycolysis/Gluconeogenesis	1	-1000	1000	0		5.3.1.9
GL0020	Phosphoglycerate mutase	3pg[c] <=> 2pg[c]	(GL30887-R1) or (GL30675-R1) or (GL24743-R1)	GL30887-R1 GL30675-R1 GL24743-R1	(PGM1 or PGM2.1 or PGM2.2)	Carbohydrate metabolism: Glycolysis/Gluconeogenesis	1	-1000	1000	0		5.4.2.12
GL0021	glucose phosphomutase	g6p[c] <=> g1p[c]	(GL24280-R1)	GL24280-R1	PGM	Carbohydrate metabolism: Glycolysis/Gluconeogenesis	1	-1000	1000	0		5.4.2.2
GL0022	Acetyl-coA Synthetase	ac[c] + coa[c] + atp[c] -> accoa[c] + amp[c] + ppi[c]	(GL18639-R1) or (GL20510-R1) or (GL21190-R1) or (GL21227-R1) or (GL21268-R1) or (GL22543-R1) or (GL23139-R1) or (GL23318-R1) or (GL23332-R1) or (GL23735-R1) or (GL27989-R1) or (GL27997-R1)	GL18639-R1 GL20510-R1 GL21190-R1 GL21227-R1 GL21268-R1 GL22543-R1 GL23139-R1 GL23318-R1 GL23332-R1 GL23735-R1 GL27989-R1 GL27997-R1	(ACS3 or ACS4 or ACS5 or ACS6 or ACS7 or ACS8 or ACS9 or ACS10 or ACS11 or ACS12 or ACS13 or ACS14)	Carbohydrate metabolism: Glycolysis/Gluconeogenesis	0	0	1000	0		6.2.1.1
GL0023	Acetyl-coA Synthetase Mitochondrial	ac[m] + coa[m] + atp[m] -> accoa[m] + amp[m] + ppi[m]	(GL30345-R1) or (GL30307-R1)	GL30345-R1 GL30307-R1	(ACS2 or ACS1)	Carbohydrate metabolism: Glycolysis/Gluconeogenesis	0	0	1000	0		6.2.1.1
GL0024	Phosphoglycerate kinase	adp[c] + 13pdg[c] <=> atp[c] + 3pg[c]				Carbohydrate metabolism: Glycolysis/Gluconeogenesis	1	-1000	1000	0		2.7.2.3
GL0025	Phosphoglycerate kinase	udpglc[c] + fru[c] <=> suc[c] + udp[c] + h[c]				Carbohydrate metabolism: Glycolysis/Gluconeogenesis	1	-1000	1000	0		2.4.1.13
GL0026	Alcohol dehydrogenase	acal[m] + nadh[m] + h[m] <=> eth[m] + nad[m]	(GL25812-R1)	GL25812-R1	ADH3	Carbohydrate metabolism: Citrate cycle (TCA cycle)	1	-1000	1000	0		1.1.1.1
GL0027	Malate dehydrogenase, cytosol	mal[c] + nad[c] -> pyr[c] + co2[c] + nadh[c]	(GL26632-R1)	GL26632-R1	MDH2	Carbohydrate metabolism: Citrate cycle (TCA cycle)	0	0	1000	0		1.1.1.38
GL0028	Malate dehydrogenase, mitochondrial	mal[m] + nad[m] -> pyr[m] + co2[m] + nadh[m]	(GL26632-R1)	GL26632-R1	MDH2	Carbohydrate metabolism: Citrate cycle (TCA cycle)	0	0	1000	0		1.1.1.38
GL0029	Isocitrate dehydrogenase (NAD+), mitochondrial	icit[m] + nad[m] <=> akg[m] + co2[m] + nadh[m]	(GL31424-R1) or (GL31294-R1)	GL31424-R1 GL31294-R1	(IDH2 or IDH1)	Carbohydrate metabolism: Citrate cycle (TCA cycle)	1	-1000	1000	0		1.1.1.41
GL0030	Formate dehydrogenase	for[c] + nad[c] -> co2[c] + nadh[c]	(GL20007-R1) or (GL22784-R1) or (GL26678-R1)	GL20007-R1 GL22784-R1 GL26678-R1	(FDH1 or FDH2 or FDH3)	Carbohydrate metabolism: Citrate cycle (TCA cycle)	0	0	1000	0		1.2.1.2
GL0031	Malic enzyme (NAD), mitochondrial	mal[m] + nad[m] <=> oaa[m] + h[m] + nadh[m]	(GL30130-R1) or (GL30803-R1)	GL30130-R1 GL30803-R1	(MAE1 or MAE2)	Carbohydrate metabolism: Citrate cycle (TCA cycle)	1	-1000	1000	0		1.1.1.37
GL0032	2-Oxoglutarate dehydrogenase complex	akg[m] + coa[m] + nad[m] -> succoa[m] + nadh[m] + co2[m]	(GL15965-R1 and GL22647-R1 and GL21912-R1)	GL15965-R1 GL22647-R1 GL21912-R1	(OGDH and DLST and DLD)	Carbohydrate metabolism: Citrate cycle (TCA cycle)	0	0	1000	0		1.2.4.2 2.3.1.61 1.8.1.4
GL0033	Succinate dehydrogenase (Ubiquinone) Mitochondrial	fadh2[m] + q[m] -> qh2[m] + fad[m]	(GL15437-R1 and GL15912-R1 and GL22227-R1 and GL24204-R1 and GL20821-R1)	GL15437-R1 GL15912-R1 GL22227-R1 GL24204-R1 GL20821-R1	(SDHC.1 and SDHB and SDHD and SDHC.2 and SDHA)	Carbohydrate metabolism: Citrate cycle (TCA cycle)	0	0	1000	0		1.3.5.1
GL0034	Succinate dehydrogenase (Complex II)	succ[m] + q[m] <=> qh2[m] + fum[m]	(GL15437-R1 and GL15912-R1 and GL22227-R1 and GL24204-R1 and GL20821-R1)	GL15437-R1 GL15912-R1 GL22227-R1 GL24204-R1 GL20821-R1	(SDHC.1 and SDHB and SDHD and SDHC.2 and SDHA)	Carbohydrate metabolism: Citrate cycle (TCA cycle)	1	-1000	1000	0		1.3.5.1
GL0035	Citrate synthase	accoa[c] + h2o[c] + oaa[c] -> cit[c] + coa[c] + h[c]	(GL20259-R1) or (GL24555-R1) or (GL25890-R1) or (GL25890-R2)	GL20259-R1 GL24555-R1 GL25890-R1 GL25890-R2	(CS1 or CS2 or CS3.1 or CS3.2)	Carbohydrate metabolism: Citrate cycle (TCA cycle)	0	0	1000	0		2.3.3.1
GL0036	ATP-citrate synthase	atp[c] + cit[c] + coa[c] -> adp[c] + pi[c] + accoa[c] + oaa[c]	(GL22137-R1)	GL22137-R1	ACS	Carbohydrate metabolism: Citrate cycle (TCA cycle)	0	0	1000	0		2.3.3.8
GL0037	Citrate synthase	accoa[m] + h2o[m] + oaa[m] -> cit[m] + coa[m] + h[m]	(GL20259-R1) or (GL24555-R1) or (GL25890-R1) or (GL25890-R2)	GL20259-R1 GL24555-R1 GL25890-R1 GL25890-R2	(CS1 or CS2 or CS3.1 or CS3.2)	Carbohydrate metabolism: Citrate cycle (TCA cycle)	0	0	1000	0		2.3.3.1
GL0038	Homocitrate synthase, mitochondrial	accoa[m] + akg[m] + h2o[m] -> hcit[m] + coa[m] + h[m]	(GL30076-R1)	GL30076-R1	LYS21	Carbohydrate metabolism: Citrate cycle (TCA cycle)	0	0	1000	0		2.3.3.14
GL0039	S-Formylglutathione hydralase	fgt[c] + h2o[c] <=> gsh[c] + for[c] + h[c]	(GL29422-R1)	GL29422-R1	FGH	Carbohydrate metabolism: Citrate cycle (TCA cycle)	1	-1000	1000	0		3.1.2.12
GL0040	Fumarase	fum[m] + h2o[m] <=> mal[m]	(GL30218-R1)	GL30218-R1	FUM	Carbohydrate metabolism: Citrate cycle (TCA cycle)	1	-1000	1000	0		4.2.1.2
GL0041	Aconitate Hydratase	cit[m] <=> icit[m]	(GL18572-R1) or (GL29907-R1)	GL18572-R1 GL29907-R1	(ACON or ACON2)	Carbohydrate metabolism: Citrate cycle (TCA cycle)	1	-1000	1000	0		4.2.1.3
GL0042	Succinate-CoA ligase (ATP-forming), mitochondrial	succ[m] + atp[m] + coa[m] <=> succoa[m] + adp[m] + pi[m]	(GL29894-R1) or (GL30631-R1)	GL29894-R1 GL30631-R1	(LSC2 or LSC1)	Carbohydrate metabolism: Citrate cycle (TCA cycle)	1	-1000	1000	0		6.2.1.5
GL0043	Pyruvate carboxylase	pyr[c] + atp[c] + hco3[c] -> oaa[c] + adp[c] + h[c] + pi[c]	(GL21673-R1)	GL21673-R1	PYC1	Carbohydrate metabolism: Citrate cycle (TCA cycle)	0	0	1000	0		6.4.1.1
GL0044	Pyruvate carboxylase	pyr[m] + atp[m] + hco3[m] -> oaa[m] + adp[m] + h[m] + pi[m]	(GL24045-R1)	GL24045-R1	PYC	Carbohydrate metabolism: Citrate cycle (TCA cycle)	0	0	1000	0		6.4.1.1
GL0045	oxaloacetase	h2o[c] + oaa[c] -> h[c] + ac[c] + oa[c]				Carbohydrate metabolism: Citrate cycle (TCA cycle)	0	0	1000	0		3.7.1.1
GL0046	6-Phosphogluconate dehydrogenase C-terminal domain-like protein	d6pgc[c] + nadp[c] -> rl5p[c] + co2[c] + nadph[c]	(GL30487-R1)	GL30487-R1	6PGD	Carbohydrate metabolism: Pentose phosphate pathway	0	0	1000	0		1.1.1.44
GL0047	Glucose 6-phosphate dehydrogenase	g6p[c] + nadp[c] -> d6pgl[c] + h[c] + nadph[c]	(GL31587-R1)	GL31587-R1	G6PD	Carbohydrate metabolism: Pentose phosphate pathway	0	0	1000	0		1.1.1.49
GL0048	Transaldolase	ga3p[c] + s7p[c] <=> e4p[c] + f6p[c]	(GL22212-R1) or (GL30545-R1)	GL22212-R1 GL30545-R1	(TAL1 or TAL2)	Carbohydrate metabolism: Pentose phosphate pathway	1	-1000	1000	0		2.2.1.2
GL0049	Gluconokinase	glca[c] + atp[c] -> d6pgc[c] + adp[c] + h[c]	(GL17591-R1)	GL17591-R1	GLK	Carbohydrate metabolism: Pentose phosphate pathway	0	0	1000	0		2.7.1.12
GL0050	Ribokinase	rib[c] + atp[c] -> r5p[c] + adp[c] + h[c]	(GL18111-R1)	GL18111-R1	RBK	Carbohydrate metabolism: Pentose phosphate pathway	0	0	1000	0		2.7.1.15
GL0051	Phosphoribosyl pyrophosphokinase	r5p[c] + atp[c] <=> prpp[c] + amp[c] + h[c]	(GL27743-R1) or (GL29962-R1)	GL27743-R1 GL29962-R1	(PRPS1 or PRPS2)	Carbohydrate metabolism: Pentose phosphate pathway	1	-1000	1000	0		2.7.6.1
GL0052	Gluconolactonase	glact[c] + h2o[c] -> glca[c] + h[c]	(GL21112-R1) or (GL27113-R1)	GL21112-R1 GL27113-R1	(GNL1 or GNL2)	Carbohydrate metabolism: Pentose phosphate pathway	0	0	1000	0		3.1.1.17
GL0053	6-Phosphogluconolactonase	d6pgl[c] + h2o[c] -> d6pgc[c] + h[c]	(GL30214-R1)	GL30214-R1	6PGL	Carbohydrate metabolism: Pentose phosphate pathway	0	0	1000	0		3.1.1.31
GL0054	Xylulose-5-phosphate phosphoketolase	xul5p[c] + pi[c] -> acpi[c] + ga3p[c] + h2o[c]	(GL29005-R1)	GL29005-R1	XPK	Carbohydrate metabolism: Pentose phosphate pathway	0	0	1000	0		4.1.2.9
GL0055	Fructose-6-phosphate phosphoketolase	f6p[c] + pi[c] -> acpi[c] + e4p[c] + h2o[c]	(GL29005-R1)	GL29005-R1	FPK	Carbohydrate metabolism: Pentose phosphate pathway	0	0	1000	0		4.1.2.22
GL0056	Ribulose 5-phosphate 3-epimerase	rl5p[c] <=> xul5p[c]	(GL30294-R1)	GL30294-R1	RPE	Carbohydrate metabolism: Pentose phosphate pathway	1	-1000	1000	0		5.1.3.1
GL0057	Ribose 5-phosphate isomerase	rl5p[c] <=> r5p[c]	(GL21223-R1)	GL21223-R1	RPI1	Carbohydrate metabolism: Pentose phosphate pathway	1	-1000	1000	0		5.3.1.6
GL0058	Phosphopentomutase	r1p[c] <=> r5p[c]	(GL24280-R1)	GL24280-R1	PGM1	Carbohydrate metabolism: Pentose phosphate pathway	1	-1000	1000	0		5.4.2.2
GL0059	fuculose-1-phosphate guanylyltransferase	fulp[c] <=> ladhde[c] + t3p2[c]				Carbohydrate metabolism: Pentose phosphate pathway	1	-1000	1000	0		4.1.2.17
GL0060	Transketolase	r5p[m] + xul5p[m] <=> ga3p[m] + s7p[m]				Carbohydrate metabolism: Pentose phosphate pathway	1	-1000	1000	0		2.2.1.1	YMGLESTG49053
GL0061	Transketolase	r5p[c] + xul5p[c] <=> ga3p[c] + s7p[c]				Carbohydrate metabolism: Pentose phosphate pathway	1	-1000	1000	0		2.2.1.1	YMGLESTG49053
GL0062	Transketolase	e4p[m] + xul5p[m] <=> ga3p[m] + f6p[m]				Carbohydrate metabolism: Pentose phosphate pathway	1	-1000	1000	0		2.2.1.1	YMGLESTG49053
GL0063	Transketolase	e4p[c] + xul5p[c] <=> ga3p[c] + f6p[c]				Carbohydrate metabolism: Pentose phosphate pathway	1	-1000	1000	0		2.2.1.1	YMGLESTG49053
GL0064	Phosphogluconate dehydrogenase (decarboxylating)	atp[c] + rl[c] -> h[c] + adp[c] + rl5p[c]				Carbohydrate metabolism: Pentose phosphate pathway	0	0	1000	0		2.7.1.16	KAAS/biopath	R3
GL0065	L-Iditol 2-dehydrogenase	xol[c] + nad[c] <=> xul[c] + nadh[c] + h[c]	(GL18988-R1) or (GL31661-R1)	GL18988-R1 GL31661-R1	IDH2 or XYL2	Carbohydrate metabolism: Pentose and glucuronate interconversions	1	-1000	1000	0		1.1.1.14 1.1.1.9
GL0066	UDP-glucose 6-dehydrogenase	udpglc[c] + h2o[c] + 2 nad[c] <=> udpga[c] + 2 nadh[c] + 3 h[c]	(GL18437-R1)	GL18437-R1	UGDH	Carbohydrate metabolism: Pentose and glucuronate interconversions	1	-1000	1000	0		1.1.1.22
GL0067	D-Arabinitol 2-dehydrogenase [NAD+]	aol[c] + nad[c] <=> rl[c] + nadh[c] + h[c]	(GL24619-R1)	GL24619-R1	ARD	Carbohydrate metabolism: Pentose and glucuronate interconversions	1	-1000	1000	0		1.1.1.250
GL0068	D-Arabinitol dehydrogenase [NADP+]	xul[c] + nadph[c] + h[c] <=> aol[c] + nadp[c]	(GL17001-R1) or (GL22336-R1) or (GL24037-R1)	GL17001-R1 GL22336-R1 GL24037-R1	(ARD1.1 or ARD1.2 or ARD1.3)	Carbohydrate metabolism: Pentose and glucuronate interconversions	1	-1000	1000	0		1.1.1.287
GL0069	D-Xylose reductase	xyl[c] + nadh[c] + h[c] -> xol[c] + nad[c]	(GL29728-R1)	GL29728-R1	XR	Carbohydrate metabolism: Pentose and glucuronate interconversions	0	0	1000	0		1.1.1.307
GL0070	D-Xylose reductase	xyl[c] + nadph[c] + h[c] -> xol[c] + nadp[c]	(GL29728-R1)	GL29728-R1	XR	Carbohydrate metabolism: Pentose and glucuronate interconversions	0	0	1000	0		1.1.1.307
GL0071	D-Xylulokinase	xul[c] + atp[c] -> xul5p[c] + adp[c] + h[c]	(GL18694-R1) or (GL21997-R1)	GL18694-R1 GL21997-R1	(XYL1 or XYL2)	Carbohydrate metabolism: Pentose and glucuronate interconversions	0	0	1000	0		2.7.1.17
GL0072	UDP glucose pyrophosphorylase	g1p[c] + h[c] + utp[c] -> udpglc[c] + ppi[c]	(GL25739-R1)	GL25739-R1	UGP	Carbohydrate metabolism: Pentose and glucuronate interconversions	0	0	1000	0		2.7.7.9
GL0073	NAD+ 2-oxidoreductase	ribol[c] + nadp[c] -> rl[c] + nadph[c] + h[c]				Carbohydrate metabolism: Pentose and glucuronate interconversions	0	0	1000	0		1.1.1.56
GL0074	L-gulonate:NADP+ 6-oxidoreductase	guln[c] + nadp[c] <=> ga[c] + nadph[c] + h[c]	(GL25699-R1)	GL25699-R1	ADH2	Carbohydrate metabolism: Pentose and glucuronate interconversions	1	-1000	1000	0		1.1.1.2
GL0075	L-Iditol 2-dehydrogenase	xol[c] + nadp[c] <=> lxul[c] + nadph[c] + h[c]				Carbohydrate metabolism: Pentose and glucuronate interconversions	1	-1000	1000	0		1.1.1.10
GL0076	L-Arabinitol dehydrogenase [NADP+]	lxul[c] + nadh[c] + h[c] <=> laol[c] + nad[c]				Carbohydrate metabolism: Pentose and glucuronate interconversions	1	-1000	1000	0		1.1.1.12
GL0077	NAD+ 1-oxidoreductase	laol[c] + nad[c] <=> ara[c] + nadp[c] + h[c]				Carbohydrate metabolism: Pentose and glucuronate interconversions	1	-1000	1000	0		1.1.1.21
GL0078	L-arabinokinase	ara[c] + atp[c] -> ara1p[c] + adp[c] + h[c]	(GL20228-R1)	GL20228-R1		Carbohydrate metabolism: Pentose and glucuronate interconversions	0	0	1000	0		2.7.1.46
GL0079	fucose fuculose	fuc[c] <=> ful[c]				Carbohydrate metabolism: Pentose phosphate pathway	1	-1000	1000	0		5.3.1.25
GL0080	fuculose-1-phosphate	ful[c] + atp[c] -> adp[c] + fulp[c] + h[c]				Carbohydrate metabolism: Pentose phosphate pathway	0	0	1000	0		2.7.1.51
GL0081	UDP-L-arabinose pyrophosphorylase	ara1p[c] + utp[c] + h[c] -> udpara[c] + ppi[c]	(GL31324-R1)	GL31324-R1		Carbohydrate metabolism: Pentose and glucuronate interconversions	0	0	1000	0		2.7.7.64
GL0082	L-Rhamnose 1-dehydrogenase	rmf[c] + nad[c] -> rml[c] + nadh[c] + h[c]	(GL29967-R1)	GL29967-R1	LRA1	Carbohydrate metabolism: rhamnose metabolism	0	0	1000	0		1.1.1.173
GL0083	L-Rhamnose 1-dehydrogenase	rml[c] + h2o[c] -> rmna[c]				Carbohydrate metabolism: rhamnose metabolism	0	0	1000	0		3.1.1.65
GL0084	L-Rhamnonate hydro-lyase	rmna[c] + h2o[c] -> kdr[c] + h[c]				Carbohydrate metabolism: rhamnose metabolism	0	0	1000	0		4.2.1.90
GL0085	(S)-Lactaldehyde	kdr[c] -> pyr[c] + ladhde[c]				Carbohydrate metabolism: rhamnose metabolism	0	0	1000	0		4.1.2.53
GL0086	L-Rhamnose pyranase	rmn[c] <=> rmf[c]				Carbohydrate metabolism: rhamnose metabolism	1	-1000	1000	0
GL0087	dTDP-L-rhamnose biosynthesis	dtdpoglc[c] + nadph[c] + h[c] -> dtdprmn[c] + nadp[c]			RFBC	Carbohydrate metabolism: rhamnose metabolism	0	0	1000	0		5.1.3.13 1.1.1.133
GL0088	dTDP-L-rhamnose biosynthesis	dtdpglc[c] -> dtdpoglc[c] + h2o[c]			TGDS	Carbohydrate metabolism: rhamnose metabolism	0	0	1000	0		4.2.1.46
GL0089	dTDP-glucose synthase	h[c] + dttp[c] + g1p[c] <=> ppi[c] + dtdpglc[c]			RFFH	Carbohydrate metabolism: rhamnose metabolism	1	-1000	1000	0		2.7.7.24
GL0090	D-Mannitol dehydrogenase (NADP+)	mnt[c] + nadp[c] -> fru[c] + nadph[c] + h[c]	(GL22336-R1) or (GL24037-R1) or (GL24037-R2)	GL22336-R1 GL24037-R1 GL24037-R2	(MDH1 or MDH2 or MDH3)	Carbohydrate metabolism: Fructose and mannose metabolism	0	0	1000	0		1.1.1.138
GL0091	D-Sorbitol dehydrogenase (D-fructose producing)	sot[c] + nad[c] -> fru[c] + h[c] + nadh[c]	(GL18988-R1)	GL18988-R1	ITD	Carbohydrate metabolism: Fructose and mannose metabolism	0	0	1000	0		1.1.1.14
GL0092	Mannitol-1-phosphate 5-dehydrogenase	mnt1p[c] + nad[c] <=> f6p[c] + nadh[c] + h[c]	(GL19432-R1)	GL19432-R1	MTLD	Carbohydrate metabolism: Fructose and mannose metabolism	1	-1000	1000	0		1.1.1.17
GL0093	GDP-L-fucose synthase	gdpddm[c] + nadph[c] + h[c] -> gdpfuc[c] + nadp[c]	(GL21002-R1)	GL21002-R1	TSTA3	Carbohydrate metabolism: Fructose and mannose metabolism	0	0	1000	0		1.1.1.271
GL0094	Fructose-2,6-bisphosphatase	f6p[c] + atp[c] -> f26p[c] + adp[c] + h[c]	(GL20873-R1)	GL20873-R1	PFKFB1	Carbohydrate metabolism: Fructose and mannose metabolism	0	0	1000	0		2.7.1.105
GL0095	GDP-mannose pyrophosphorylase	man1p[c] + gtp[c] + h[c] -> gdpman[c] + ppi[c]	(GL25424-R1)	GL25424-R1	GMP	Carbohydrate metabolism: Fructose and mannose metabolism	0	0	1000	0		2.7.7.13
GL0096	Fructose-2,6-bisphosphatase	f26p[c] + adp[c] + h[c] -> f6p[c] + atp[c]	(GL20873-R1)	GL20873-R1	PFKFB1	Carbohydrate metabolism: Fructose and mannose metabolism	0	0	1000	0		3.1.3.46
GL0097	GDP-mannose 4,6-dehydratase	gdpman[c] -> gdpddm[c] + h2o[c]	(GL20928-R1)	GL20928-R1	GMDS	Carbohydrate metabolism: Fructose and mannose metabolism	0	0	1000	0		4.2.1.47
GL0098	Mannose-6-phosphate isomerase	man6p[c] <=> f6p[c]	(GL17878-R1) or (GL22193-R1)	GL17878-R1 GL22193-R1	(PMI1 or PMI2)	Carbohydrate metabolism: Fructose and mannose metabolism	1	-1000	1000	0		5.3.1.8
GL0099	mannose phosphomutase	man1p[c] <=> man6p[c]	(GL20742-R1) or (GL21817-R1)	GL20742-R1 GL21817-R1	(PMM1 or PMM2)	Carbohydrate metabolism: Fructose and mannose metabolism	1	-1000	1000	0		5.4.2.8
GL0100	Lactaldehyde Dehydrogenase	ladhde[c] + nad[c] + h2o[c] <=> llac[c] + 2 h[c] + nadh[c]				Carbohydrate metabolism: Fructose and mannose metabolism	1	-1000	1000	0
GL0101	fucokinase	atp[c] + fuc[c] -> adp[c] + fuc1p[c]	(GL29012-R1)	GL29012-R1		Carbohydrate metabolism: Fructose and mannose metabolism	0	0	1000	0		2.7.1.52	KAAS/metcyc	R03161
GL0102	fucose-1-phosphate guanylyltransferase	gtp[c] + fuc1p[c] <=> ppi[c] + gdpfuc[c]	(GL21219-R1)	GL21219-R1		Carbohydrate metabolism: Fructose and mannose metabolism	1	-1000	1000	0		2.7.7.30	KAAS	R01951
GL0103	Mannitol-1-phosphatase	h2o[c] + mnt1p[c] -> pi[c] + mnt[c]				Carbohydrate metabolism: Fructose and mannose metabolism	0	0	1000	0		3.1.3.22
GL0104	Galactose oxidase	glac[c] + o2[c] + h2o[c] -> dgla[c] + h2o2[c] + h[c]	(GL21399-R1) or (GL22642-R1)	GL21399-R1 GL22642-R1	(GAO1 or GAO2)	Carbohydrate metabolism: Galactose metabolism	0	0	1000	0		1.1.3.9
GL0105	Galactokinase	glac[c] + atp[c] -> gal1p[c] + adp[c] + h[c]	(GL17052-R1)	GL17052-R1	GALK	Carbohydrate metabolism: Galactose metabolism	0	0	1000	0		2.7.1.6
GL0106	Alpha-glucosidase	mlt[e] + h2o[e] -> 2 glc[e]	(GL22859-R1) or (GL30020-R1) or (GL30117-R1) or (GL30925-R1) or (GL30116-R1)	GL22859-R1 GL30020-R1 GL30117-R1 GL30925-R1 GL30116-R1	(AGDC or MAL1.1 or MAL1.2 or MAL1.3 or MAL1.4)	Carbohydrate metabolism: Galactose metabolism	0	0	1000	0		3.2.1.20
GL0107	Alpha-galactosidase	meli[e] + h2o[e] -> glac[e] + glc[e]	(GL21024-R1) or (GL25150-R1) or (GL25150-R2) or (GL30909-R1) or (GL23450-R1)	GL21024-R1 GL25150-R1 GL25150-R2 GL30909-R1 GL23450-R1	(GALA1.1 or GALA1.2 or GALA1.3 or GALA1.4 or GALA1.5)	Carbohydrate metabolism: Galactose metabolism	0	0	1000	0		3.2.1.22
GL0108	Alpha-galactosidase	epm[e] + h2o[e] <=> man[e] + glac[e]	(GL21024-R1) or (GL25150-R1) or (GL25150-R2) or (GL30909-R1) or (GL23450-R1)	GL21024-R1 GL25150-R1 GL25150-R2 GL30909-R1 GL23450-R1	(GALA1.1 or GALA1.2 or GALA1.3 or GALA1.4 or GALA1.5)	Carbohydrate metabolism: Galactose metabolism	1	-1000	1000	0		3.2.1.22
GL0109	Alpha-galactosidase	melt[e] + h2o[e] <=> sot[e] + glac[e]	(GL21024-R1) or (GL25150-R1) or (GL25150-R2) or (GL30909-R1) or (GL23450-R1)	GL21024-R1 GL25150-R1 GL25150-R2 GL30909-R1 GL23450-R1	(GALA1.1 or GALA1.2 or GALA1.3 or GALA1.4 or GALA1.5)	Carbohydrate metabolism: Galactose metabolism	1	-1000	1000	0		3.2.1.22
GL0110	Alpha-galactosidase	mann[e] + h2o[e] <=> glac[e] + meli[e]	(GL21024-R1) or (GL25150-R1) or (GL25150-R2) or (GL30909-R1) or (GL23450-R1)	GL21024-R1 GL25150-R1 GL25150-R2 GL30909-R1 GL23450-R1	(GALA1.1 or GALA1.2 or GALA1.3 or GALA1.4 or GALA1.5)	Carbohydrate metabolism: Galactose metabolism	1	-1000	1000	0		3.2.1.22
GL0111	Alpha-galactosidase	glacl[e] + h2o[e] <=> ins[e] + glac[e]	(GL21024-R1) or (GL25150-R1) or (GL25150-R2) or (GL30909-R1) or (GL23450-R1)	GL21024-R1 GL25150-R1 GL25150-R2 GL30909-R1 GL23450-R1	(GALA1.1 or GALA1.2 or GALA1.3 or GALA1.4 or GALA1.5)	Carbohydrate metabolism: Galactose metabolism	1	-1000	1000	0		3.2.1.22
GL0112	Alpha-galactosidase	glacgl[e] + h2o[e] <=> glac[e] + gl[e]	(GL21024-R1) or (GL25150-R1) or (GL25150-R2) or (GL30909-R1) or (GL23450-R1)	GL21024-R1 GL25150-R1 GL25150-R2 GL30909-R1 GL23450-R1	(GALA1.1 or GALA1.2 or GALA1.3 or GALA1.4 or GALA1.5)	Carbohydrate metabolism: Galactose metabolism	1	-1000	1000	0		3.2.1.22
GL0113	Beta-fructofuranosidase	raff[e] + h2o[e] -> meli[e] + fru[e]	(GL19397-R1)	GL19397-R1	SACA	Carbohydrate metabolism: Galactose metabolism	0	0	1000	0		3.2.1.26
GL0114	Beta-fructofuranosidase	stac[e] + h2o[e] -> mann[e] + fru[e]	(GL19397-R1)	GL19397-R1	SACA	Carbohydrate metabolism: Galactose metabolism	0	0	1000	0		3.2.1.26
GL0115	Galactonate dehydratase	dgla[c] -> ddgla[c] + h2o[c]	(GL22434-R1)	GL22434-R1	DGOD	Carbohydrate metabolism: Galactose metabolism	0	0	1000	0		4.2.1.6
GL0116	Beta-galactosidase	h2o[c] + lact[c] -> glc[c] + glac[c]				Carbohydrate metabolism: Galactose metabolism	0	0	1000	0		3.2.1.23
GL0117	Galactokinase	gal1p[c] + udpglc[c] <=> g1p[c] + udpglac[c]				Carbohydrate metabolism: Galactose metabolism	1	-1000	1000	0		2.7.7.12	YMGLESTG49131
GL0118	Glycogen phosphorylase	glycogen[c] + pi[c] -> g1p[c]	(GL21375-R1)	GL21375-R1	PYG	Carbohydrate metabolism: Starch and sucrose metabolism	0	0	1000	0		2.4.1.1
GL0119	Glycogen phosphorylase	pi[c] + mltose[c] -> g1p[c] + mltiose[c]	(GL21375-R1)	GL21375-R1	PYG	Carbohydrate metabolism: Starch and sucrose metabolism	0	0	1000	0		2.4.1.1
GL0120	Dolichyl phosphate mannose protein mannosyltransferase endoplasmic reticular	dolmanp[c] -> dolp[c] + mannan[c] + h[c]	(GL21929-R1) or (GL24505-R1) or (GL26631-R1)	GL21929-R1 GL24505-R1 GL26631-R1	(POMT1 or POMT2 or POMT3)	Carbohydrate metabolism: Starch and sucrose metabolism	0	0	1000	0		2.4.1.109
GL0121	Mannosyl-oligosaccharide 1,2-alpha-mannosidase	mannan[c] + h2o[c] -> man[c]	(GL21852-R1) or (GL21617-R1) or (GL20698-R1) or (GL20698-R2) or (GL20848-R1) or (GL21844-R1) or (GL21844-R2) or (GL30115-R1)	GL21852-R1 GL21617-R1 GL20698-R1 GL20698-R2 GL20848-R1 GL21844-R1 GL21844-R2 GL30115-R1	MNS1	Carbohydrate metabolism: Starch and sucrose metabolism	0	0	1000	0		3.2.1.113
GL0122	Glycogen synthase (UDPGlc)	udpglc[c] -> glycogen[c] + h[c] + udp[c]	(GL24971-R1)	GL24971-R1	GSY	Carbohydrate metabolism: Starch and sucrose metabolism	0	0	1000	0		2.4.1.11
GL0123	Glycogen (starch) synthase	udpglc[c] -> 14glucan[c] + udp[c] + h[c]	(GL24971-R1)	GL24971-R1	GSY	Carbohydrate metabolism: Starch and sucrose metabolism	0	0	1000	0		2.4.1.11
GL0124	Alpha,alpha-trehalose-phosphate synthase (UDP-forming)	g6p[c] + udpglc[c] -> tre6p[c] + udp[c] + h[c]	(GL21342-R1) or (GL26018-R1) or (GL22527-R1)	GL21342-R1 GL26018-R1 GL22527-R1	(TPS2 or TPS1 or TPSB)	Carbohydrate metabolism: Starch and sucrose metabolism	0	0	1000	0		2.4.1.15
GL0125	1,4-Alpha-glucan branching enzyme	14glucan[c] -> glycogen[c]	(GL31461-R1)	GL31461-R1	GLC3	Carbohydrate metabolism: Starch and sucrose metabolism	0	0	1000	0		2.4.1.18
GL0126	4-Alpha-glucanotransferase	mltiose[c] + mlt[c] <=> glc[c] + mltose[c]	(GL18711-R1)	GL18711-R1	AGL	Carbohydrate metabolism: Starch and sucrose metabolism	1	-1000	1000	0		2.4.1.25
GL0127	1,3-Beta-glucan synthase	udpglc[c] -> 13glucan[c] + h[c] + udp[c]	(GL20535-R1) or (GL24465-R1)	GL20535-R1 GL24465-R1	(GLS1 or GLS2)	Carbohydrate metabolism: Starch and sucrose metabolism	0	0	1000	0		2.4.1.34
GL0128	1,4-beta-D-xylan synthase	udpxyl[c] -> udp[c] + xylan[c] + h[c]				Carbohydrate metabolism: Starch and sucrose metabolism	0	0	1000	0		2.4.2.24
GL0129	Trehalose-phosphatase	tre6p[c] + h2o[c] <=> tre[c] + pi[c]	(GL21342-R1) or (GL22527-R1)	GL21342-R1 GL22527-R1	(TPS2 0r TPSB)	Carbohydrate metabolism: Starch and sucrose metabolism	1	-1000	1000	0		3.1.3.12
GL0130	alpha-amylase	star[c] -> dex[c] + starr[c]	(GL27531-R1) or (GL24914-R1) or (GL15361-R1) or (GL26000-R1)	GL27531-R1 GL24914-R1 GL15361-R1 GL26000-R1	(AMYA1.1 or AMYA1.2 or AMYA1.3 or AMYA1.4)	Carbohydrate metabolism: Starch and sucrose metabolism	0	0	1000	0		3.2.1.1
GL0131	Alpha-glucoside glucohydrolase	h2o[c] + suc[c] -> glc[c] + fru[c]	(GL22859-R1) or (GL30020-R1) or (GL30117-R1) or (GL30925-R1) or (GL30116-R1)	GL22859-R1 GL30020-R1 GL30117-R1 GL30925-R1 GL30116-R1	(AGDC or MAL1.1 or MAL1.2 or MAL1.3 or MAL1.4)	Carbohydrate metabolism: Starch and sucrose metabolism	0	0	1000	0		3.2.1.20
GL0132	Alpha-glucoside glucohydrolase	mlt[c] + h2o[c] -> 2 glc[c]	(GL22859-R1) or (GL30020-R1) or (GL30117-R1) or (GL30925-R1) or (GL30116-R1)	GL22859-R1 GL30020-R1 GL30117-R1 GL30925-R1 GL30116-R1	(AGDC or MAL1.1 or MAL1.2 or MAL1.3 or MAL1.4)	Carbohydrate metabolism: Starch and sucrose metabolism	0	0	1000	0		3.2.1.20
GL0133	Beta-glucosidase (cellobiose)	cellob[e] + h2o[e] -> 2 glc[e]	(GL20553-R1) or (GL24039-R1) or (GL30154-R1) or (GL19708-R1) or (GL20743-R1) or (GL27550-R1) or (GL29912-R1) or (GL29918-R1) or (GL29918-R2) or (GL22859-R1) or (GL24911-R1) or (GL27561-R1)	GL20553-R1 GL24039-R1 GL30154-R1 GL19708-R1 GL20743-R1 GL27550-R1 GL29912-R1 GL29918-R1 GL29918-R2 GL22859-R1 GL24911-R1 GL27561-R1	(BGL1B.1 or BGL1B.2 or BGL1 or BGL2 or BGLJ or BGLL.1 or BGLL.2 or BGLL.3 or BGLL.4 or AGDC or BGLI or BGLL.5)	Carbohydrate metabolism: Starch and sucrose metabolism	0	0	1000	0		3.2.1.21
GL0134	Beta-glucosidase (cellobiose)	cellob[c] + h2o[c] -> 2 glc[c]	(GL20553-R1) or (GL24039-R1) or (GL30154-R1) or (GL19708-R1) or (GL20743-R1) or (GL27550-R1) or (GL29912-R1) or (GL29918-R1) or (GL29918-R2) or (GL22859-R1) or (GL24911-R1) or (GL27561-R1)	GL20553-R1 GL24039-R1 GL30154-R1 GL19708-R1 GL20743-R1 GL27550-R1 GL29912-R1 GL29918-R1 GL29918-R2 GL22859-R1 GL24911-R1 GL27561-R1	(BGL1B.1 or BGL1B.2 or BGL1 or BGL2 or BGLJ or BGLL.1 or BGLL.2 or BGLL.3 or BGLL.4 or AGDC or BGLI or BGLL.5)	Carbohydrate metabolism: Starch and sucrose metabolism	0	0	1000	0		3.2.1.21
GL0135	Beta-fructofuranosidase	suc6p[e] + h2o[e] -> fru[e] + g6p[e]	(GL19397-R1)	GL19397-R1	SACA	Carbohydrate metabolism: Starch and sucrose metabolism	0	0	1000	0		3.2.1.26
GL0136	Alpha,alpha-trehalase	h2o[c] + tre[c] -> 2 glc[c]	(GL24361-R1) or (GL26035-R1)	GL24361-R1 GL26035-R1	(TRE1 or TRE2)	Carbohydrate metabolism: Starch and sucrose metabolism	0	0	1000	0		3.2.1.28
GL0137	Glucan 1,4-alpha-glucosidase	glycogen[e] + h2o[e] -> glc[e]	(GL23580-R1) or (GL23600-R1)	GL23580-R1 GL23600-R1	(GAM1 or GAM2)	Carbohydrate metabolism: Starch and sucrose metabolism	0	0	1000	0		3.2.1.3
GL0138	Glucan 1,4-alpha-glucosidase	4 h2o[c] + dex[c] -> 4 glc[c]	(GL23580-R1) or (GL23600-R1)	GL23580-R1 GL23600-R1	(GAM1 or GAM2)	Carbohydrate metabolism: Starch and sucrose metabolism	0	0	1000	0		3.2.1.3
GL0139	glycogen debranching enzyme	h2o[c] + star[c] -> glc[c] + 7 14glucan[c]	(GL18711-R1)	GL18711-R1	AGL	Carbohydrate metabolism: Starch and sucrose metabolism	0	0	1000	0		3.2.1.33
GL0140	Beta-xylosidase	xylan[c] + h2o[c] -> xyl[c]	(GL19093-R1) or (GL22586-R1) or (GL22886-R1) or (GL21370-R1)	GL19093-R1 GL22586-R1 GL22886-R1 GL21370-R1	(XYL4.1 or XYL4.2 or XYL4.3 or XYL4.4)	Carbohydrate metabolism: Starch and sucrose metabolism	0	0	1000	0		3.2.1.37
GL0141	Exo-1,3-beta-glucan glucohydrase, extracellular	13glucan[e] + h2o[e] -> glc[e]	(GL24581-R1) or (GL24581-R2) or (GL21451-R1) or (GL23395-R1) or (GL30087-R1) or (GL25895-R1)	GL24581-R1 GL24581-R2 GL21451-R1 GL23395-R1 GL30087-R1 GL25895-R1	(EXG1.1 or EXG1.2 or EXG1.3 or EXG1.4 or EXG1.5 or EXG1.6)	Carbohydrate metabolism: Starch and sucrose metabolism	0	0	1000	0		3.2.1.58
GL0142	Cellulose 1,4-beta-cellobiosidase	6 cellu[e] + 3 h2o[e] -> cellob[e] + glc[e] + cellot[e]	(GL18725-R1) or (GL24712-R1) or (GL29727-R1) or (GL30351-R1)	GL18725-R1 GL24712-R1 GL29727-R1 GL30351-R1	(GUX1.1 or GUX3 or GUX1.2 or GUX1.3)	Carbohydrate metabolism: Starch and sucrose metabolism	0	0	1000	0		3.2.1.91
GL0143	UDP-glucuronate decarboxylase	udpga[c] + h[c] -> udpxyl[c] + co2[c]	(GL26652-R1)	GL26652-R1	UXS1	Carbohydrate metabolism: Starch and sucrose metabolism	0	0	1000	0		4.1.1.35
GL0144	UDP-arabinose 4-epimerase	udpxyl[c] <=> udpara[c]			UXE	Carbohydrate metabolism: Starch and sucrose metabolism	1	-1000	1000	0		5.1.3.5
GL0145	Glucosamine N-acetyltransferase	glcnt[c] + accoa[c] -> nag[c] + coa[c]	(GL16576-R1)	GL16576-R1	GNAT	Carbohydrate metabolism: Amino sugar and nucleotide sugar metabolism	0	0	1000	0		2.3.1.3
GL0146	N-acetylglucosamine-6-phosphate synthase	ga6p[c] + accoa[c] <=> naga6p[c] + coa[c] + h[c]	(GL22204-R1)	GL22204-R1	GNA1	Carbohydrate metabolism: Amino sugar and nucleotide sugar metabolism	1	-1000	1000	0		2.3.1.4
GL0147	Chitin synthase	udpnag[c] -> chit[c] + h[c] + udp[c]	(GL18134-R1) or (GL27380-R1) or (GL28060-R1) or (GL30737-R1) or (GL30799-R1) or (GL31550-R1) or (GL27969-R1) or (GL25613-R1) or (GL15273-R1)	GL18134-R1 GL27380-R1 GL28060-R1 GL30737-R1 GL30799-R1 GL31550-R1 GL27969-R1 GL25613-R1 GL15273	CHS1.1 or CHS1.2 or CHS1.3 or CHS1.4 or CHS1.5 or CHS1.6 or CHS1.7 or CHS1.8 or CHS1.9)	Carbohydrate metabolism: Amino sugar and nucleotide sugar metabolism	0	0	1000	0		2.4.1.16
GL0148	UDP-N-acetylglucosamine 1-carboxyvinyltransferase	pep[c] + udpnag[c] -> udpnacg[c] + pi[c]	(GL26730-R1)	GL26730-R1	MURA	Carbohydrate metabolism: Amino sugar and nucleotide sugar metabolism	0	0	1000	0		2.5.1.7
GL0149	L-Glutamine D-fructose 6-phosphate amidotansferase	gln[c] + f6p[c] -> glu[c] + ga6p[c]	(GL18900-R1)	GL18900-R1	GLMS	Carbohydrate metabolism: Amino sugar and nucleotide sugar metabolism	0	0	1000	0		2.6.1.16
GL0150	UDP-N-acetylglucosamine pyrophosphorylase	naga1p[c] + h[c] + utp[c] <=> udpnag[c] + ppi[c]	(GL30088-R1)	GL30088-R1	UAP1	Carbohydrate metabolism: Amino sugar and nucleotide sugar metabolism	1	-1000	1000	0		2.7.7.23
GL0151	Chitinase	2 chit[e] + h2o[e] -> chib[e]	(GL15508-R1) or (GL15547-R1) or (GL15744-R1) or (GL17045-R1) or (GL17093-R1) or (GL17641-R1) or (GL18544-R1) or (GL20391-R1) or (GL21171-R1) or (GL22147-R1) or (GL24065-R1) or (GL24125-R1) or (GL24153-R1) or (GL24153-R2) or (GL24162-R1) or (GL24217-R1) or (GL24235-R1) or (GL24376-R1) or (GL25033-R1) or (GL25627-R1) or (GL25816-R1) or (GL25941-R1) or (GL28316-R1) or (GL29255-R1) or (GL31157-R1) or…	GL15508-R1 GL15547-R1 GL15744-R1 GL17045-R1 GL17093-R1 GL17641-R1 GL18544-R1 GL20391-R1 GL21171-R1 GL22147-R1 GL24065-R1 GL24125-R1 GL24153-R1 GL24153-R2 GL24162-R1 GL24217-R1 GL24235-R1 GL24376-R1 GL25033-R1 GL25627-R1 GL25816-R1 GL25941-R1 GL28316-R1 GL29255-R1 GL31157-R1 GL22188-R1 GL26040-R1	(CHT1.1 or CHT1.2 or CHT1.3 or CHT1.4 or CHT1.5 or CHT1.6 or CHT1.7 or CHT1.8 or CHT1.9 or CHT1.10 or CHT1.11 or CHT1.12 or CHT1.13 or CHT1.14 or CHT1.15 or CHT1.16 or CHT1.17 or CHT1.18 or CHT1.19 or CHT1.20 or CHT1.21 or CHT1.22 or CHT1.23 or CHT1.24 or CHT1.25 CHT1.26 or CHT1.27)	Carbohydrate metabolism: Amino sugar and nucleotide sugar metabolism	0	0	1000	0		3.2.1.14
GL0152	Chitinase	chit[e] + h2o[e] -> nag[e]	(GL15508-R1) or (GL15547-R1) or (GL15744-R1) or (GL17045-R1) or (GL17093-R1) or (GL17641-R1) or (GL18544-R1) or (GL20391-R1) or (GL21171-R1) or (GL22147-R1) or (GL24065-R1) or (GL24125-R1) or (GL24153-R1) or (GL24153-R2) or (GL24162-R1) or (GL24217-R1) or (GL24235-R1) or (GL24376-R1) or (GL25033-R1) or (GL25627-R1) or (GL25816-R1) or (GL25941-R1) or (GL28316-R1) or (GL29255-R1) or (GL31157-R1) or…	GL15508-R1 GL15547-R1 GL15744-R1 GL17045-R1 GL17093-R1 GL17641-R1 GL18544-R1 GL20391-R1 GL21171-R1 GL22147-R1 GL24065-R1 GL24125-R1 GL24153-R1 GL24153-R2 GL24162-R1 GL24217-R1 GL24235-R1 GL24376-R1 GL25033-R1 GL25627-R1 GL25816-R1 GL25941-R1 GL28316-R1 GL29255-R1 GL31157-R1 GL22188-R1 GL26040-R1	(CHT1.1 or CHT1.2 or CHT1.3 or CHT1.4 or CHT1.5 or CHT1.6 or CHT1.7 or CHT1.8 or CHT1.9 or CHT1.10 or CHT1.11 or CHT1.12 or CHT1.13 or CHT1.14 or CHT1.15 or CHT1.16 or CHT1.17 or CHT1.18 or CHT1.19 or CHT1.20 or CHT1.21 or CHT1.22 or CHT1.23 or CHT1.24 or CHT1.25 CHT1.26 or CHT1.27)	Carbohydrate metabolism: Amino sugar and nucleotide sugar metabolism	0	0	1000	0		3.2.1.14
GL0153	Beta-N-acetylhexosaminidase	chib[e] + h2o[e] -> 2 nag[e]	(GL15526-R1) or (GL18102-R1) or (GL24346-R1) or (GL24347-R1) or (GL24347-R2) or (GL24372-R1) or (GL29544-R1)	GL15526-R1 GL18102-R1 GL24346-R1 GL24347-R1 GL24347-R2 GL24372-R1 GL29544-R1	(NAGZ or HEXA_B1 or HEXA_B2 or HEXA_B3 or HEXA_B4 or HEXA_B5 or HEXA_B6)	Carbohydrate metabolism: Amino sugar and nucleotide sugar metabolism	0	0	1000	0		3.2.1.52
GL0154	N-acetylglucosamine-6-phosphate deacetylase	naga6p[c] + h2o[c] -> ga6p[c] + ac[c]	(GL24032-R1)	GL24032-R1	NAG2	Carbohydrate metabolism: Amino sugar and nucleotide sugar metabolism	0	0	1000	0		3.5.1.25
GL0155	Chitin deacetylase	chit[c] + h2o[c] -> chito[c] + ac[c] + h[c]	(GL24176-R1)	GL24176-R1	CDA1	Carbohydrate metabolism: Amino sugar and nucleotide sugar metabolism	0	0	1000	0		3.5.1.41
GL0156	Chitin deacetylase	chit[e] + h2o[e] -> chito[e] + ac[e] + h[e]	(GL29877-R1) or (GL29877-R2)	GL29877-R1 GL29877-R2	(CDA2.1 or CDA2.2)	Carbohydrate metabolism: Amino sugar and nucleotide sugar metabolism	0	0	1000	0		3.5.1.41
GL0157	Glucosamine-6-phosphate deaminase	ga6p[c] + h2o[c] -> f6p[c] + nh3[c]	(GL25288-R1)	GL25288-R1	NAG	Carbohydrate metabolism: Amino sugar and nucleotide sugar metabolism	0	0	1000	0		3.5.99.6
GL0158	Phosphoacetylglucosamine mutase	naga1p[c] <=> naga6p[c]	(GL30958-R1)	GL30958-R1	PCM1	Carbohydrate metabolism: Amino sugar and nucleotide sugar metabolism	1	-1000	1000	0		5.4.2.3
GL0159	Alpha-N-arabinofuranosidase	abn[e] + h2o[e] -> ara[e]	(GL22560-R1) or (GL22224-R1)	GL22560-R1 GL22224-R1	(ABFC or ABFA)	Carbohydrate metabolism: Amino sugar and nucleotide sugar metabolism	0	0	1000	0		3.2.1.55
GL0160	NADPH-dependent methylglyoxal reductase	ladhde[c] + nadp[c] <=> mthgxl[c] + nadph[c] + h[c]	(GL18839-R1) or (GL22235-R1) or (GL22251-R1)	GL18839-R1 GL22235-R1 GL22251-R1		Carbohydrate metabolism: Pyruvate metabolism	1	-1000	1000	0		1.1.1.283
GL0161	Glyoxylate/hydroxypyruvate reductase	dlald[c] + nad[c] <=> mthgxl[c] + nadh[c] + h[c]	(GL17003-R1)	GL17003-R1	GRHPR	Carbohydrate metabolism: Pyruvate metabolism	1	-1000	1000	0		1.1.1.81
GL0162	Malate dehydrogenase	mal[m] + nadp[m] -> pyr[m] + co2[m] + nadph[m]	(GL22666-R1)	GL22666-R1	MDH	Carbohydrate metabolism: Pyruvate metabolism	0	0	1000	0		1.1.1.40
GL0163	L-Lactate dehydrogenase, mitochondrial	2 feri[m] + llac[m] -> 2 fero[m] + pyr[m] + 2 h[m]	(GL18633-R1) or (GL30499-R1) or (GL21586-R1) or (GL15784-R1)	GL18633-R1 GL30499-R1 GL21586-R1 GL15784-R1	(CYB2.1 or CYB2.2 or CYB2.3 or CYB2.4)	Carbohydrate metabolism: Pyruvate metabolism	0	0	1000	0		1.1.2.3
GL0164	D-lactate dehydrogenase, mitochondrial	2 feri[m] + dlac[m] -> 2 fero[m] + pyr[m] + 2 h[m]	(GL25048-R1) or (GL29921-R1)	GL25048-R1 GL29921-R1	(DLD1 or DLD2)	Carbohydrate metabolism: Pyruvate metabolism	0	0	1000	0		1.1.2.4
GL0165	Acetyl-CoA C-acetyltransferase	aaccoa[m] + coa[m] <=> 2 accoa[m]	(GL26574-R1)	GL26574-R1	ATOB	Carbohydrate metabolism: Pyruvate metabolism	1	-1000	1000	0		2.3.1.9
GL0166	2-Isopropylmalate synthase	omval[c] + accoa[c] + h2o[c] -> ippmal[c] + coa[c] + h[c]	(GL19766-R1) or (GL22590-R1)	GL19766-R1 GL22590-R1	(LEU1 or LEU2)	Carbohydrate metabolism: Pyruvate metabolism	0	0	1000	0		2.3.3.13
GL0167	Malate synthase	accoa[m] + glx[m] + h2o[m] -> mal[m] + coa[m] + h[m]	(GL23465-R1)	GL23465-R1	MLS	Carbohydrate metabolism: Pyruvate metabolism	0	0	1000	0		2.3.3.9
GL0168	Acetate kinase	ac[c] + atp[c] -> acpi[c] + adp[c]	(GL17906-R1)	GL17906-R1	ACK1	Carbohydrate metabolism: Pyruvate metabolism	0	0	1000	0		2.7.2.1
GL0169	Acylphosphatase	acpi[c] + h2o[c] -> ac[c] + pi[c] + h[c]	(GL19012-R1)	GL19012-R1		Carbohydrate metabolism: Pyruvate metabolism	0	0	1000	0		3.6.1.7
GL0170	Pyruvate decarboxylase	pyr[c] + h[c] -> acal[c] + co2[c]	(GL23873-R1)	GL23873-R1	PDC	Carbohydrate metabolism: Pyruvate metabolism	0	0	1000	0		4.1.1.1
GL0171	Lactoylglutathione lyase	gsh[c] + mthgxl[c] <=> lgt[c]	(GL23384-R1)	GL23384-R1	GLO1	Carbohydrate metabolism: Pyruvate metabolism	1	-1000	1000	0		4.4.1.5
GL0172	Acetyl CoA carboxylase	accoa[c] + atp[c] + hco3[c] -> malcoa[c] + adp[c] + h[c] + pi[c]	(GL21959-R1)	GL21959-R1	ACAC	Carbohydrate metabolism: Pyruvate metabolism	0	0	1000	0		6.4.1.2
GL0173	Acetyl-CoA carboxylase	accoa[c] + cccp[c] -> malcoa[c] + bccp[c]	(GL21959-R1)	GL21959-R1	ACAC	Carbohydrate metabolism: Pyruvate metabolism	0	0	1000	0		6.4.1.2
GL0174	Catalase	2 h2o2[m] -> o2[m] + 2 h2o[m]	(GL22189-R1) or (GL29881-R1) or (GL26833-R1)	GL22189-R1 GL29881-R1 GL26833-R1	(CAT1 or CAT2 or CAT3)	Carbohydrate metabolism: Glyoxylate and dicarboxylate metabolism	0	0	1000	0		1.11.1.6
GL0175	Glyoxylate dehydrogenase	glx[c] + coa[c] + nadp[c] <=> oacoa[c] + nadph[c] + h[c]	(GL21586-R1)	GL21586-R1	GDH	Carbohydrate metabolism: Glyoxylate and dicarboxylate metabolism	1	-1000	1000	0		1.2.1.17
GL0176	Formamidase	frmd[c] + h2o[c] -> for[c] + nh3[c]	(GL23379-R1)	GL23379-R1	FRM	Carbohydrate metabolism: Glyoxylate and dicarboxylate metabolism	0	0	1000	0		3.5.1.49
GL0177	Oxalate decarboxylase	oa[c] + h[c] -> for[c] + co2[c]	(GL21526-R1) or (GL26132-R1) or (GL29056-R1) or (GL23705-R1) or (GL26002-R1)	GL21526-R1 GL26132-R1 GL29056-R1 GL23705-R1 GL26002-R1	(OXD1.1 or OXD1.2 or OXD1.3 or OXD1.4 or OXD1.5)	Carbohydrate metabolism: Glyoxylate and dicarboxylate metabolism	0	0	1000	0		4.1.1.2
GL0178	Isocitrate lyase	icit[m] -> glx[m] + succ[m]	(GL23590-R1) or (GL30707-R1)	GL23590-R1 GL30707-R1	(ICL1 or ICL2)	Carbohydrate metabolism: Glyoxylate and dicarboxylate metabolism	0	0	1000	0		4.1.3.1
GL0179	Propanoate:CoA ligase (AMP-forming)	atp[c] + prop[c] + coa[c] <=> amp[c] + ppi[c] + ppcoa[c]	(GL18639-R1) or (GL20510-R1) or (GL21190-R1) or (GL21227-R1) or (GL21268-R1) or (GL22543-R1) or (GL23139-R1) or (GL23318-R1) or (GL23332-R1) or (GL23735-R1) or (GL27989-R1) or (GL27997-R1)	GL18639-R1 GL20510-R1 GL21190-R1 GL21227-R1 GL21268-R1 GL22543-R1 GL23139-R1 GL23318-R1 GL23332-R1 GL23735-R1 GL27989-R1 GL27997-R1	(ACS3 or ACS4 or ACS5 or ACS6 or ACS7 or ACS8 or ACS9 or ACS10 or ACS11 or ACS12 or ACS13 or ACS14)	Carbohydrate metabolism: Propanoate metabolism	1	-1000	1000	0		6.2.1.1
GL0180	Propanoate:CoA ligase (AMP-forming)	atp[m] + prop[m] + coa[m] <=> amp[m] + ppi[m] + ppcoa[m]	(GL30345-R1) or (GL30307-R1)	GL30345-R1 GL30307-R1	(ACS2 or ACS1)	Carbohydrate metabolism: Propanoate metabolism	1	-1000	1000	0		6.2.1.1
GL0181	ATP:propanoate phosphotransferase	atp[c] + prop[c] <=> adp[c] + ppap[c]	(GL17906-R1)	GL17906-R1	ACK1	Carbohydrate metabolism: Propanoate metabolism	1	-1000	1000	0		2.7.2.1
GL0182	3-Hydroxybutyryl-CoA dehydrogenase	c4hcoa[c] + nadp[c] <=> aaccoa[c] + nadph[c] + h[c]	(GL24433-R1) or (GL24433-R2)	GL24433-R1 GL24433-R2	(HBD1 or HBD2)	Carbohydrate metabolism: Butanoate metabolism	1	-1000	1000	0		1.1.1.157
GL0183	Diacetyl reductase	dac[m] + nadh[m] + h[m] -> acen[m] + nad[m]	(GL22166-R1) or (GL22166-R2)	GL22166-R1 GL22166-R2	(BUDC1.1 or BUDC1.2)	Carbohydrate metabolism: Butanoate metabolism	0	0	1000	0		1.1.1.303
GL0184	(R,R)-Butanediol dehydrogenase	bu23d[m] + nad[m] <=> acen[m] + nadh[m] + h[m]	(GL22166-R1) or (GL22166-R2)	GL22166-R1 GL22166-R2	(BUDC1.1 or BUDC1.2)	Carbohydrate metabolism: Butanoate metabolism	1	-1000	1000	0		1.1.1.4
GL0185	Succinate semialdehyde dehydrogenase	succsal[c] + nadp[c] + h2o[c] -> succ[c] + nadph[c] + 2 h[c]	(GL23324-R1) or (GL21887-R1)	GL23324-R1 GL21887-R1	(GABD1.1 or GABD1.2)	Carbohydrate metabolism: Butanoate metabolism	0	0	1000	0		1.2.1.79
GL0186	Succinate semialdehyde dehydrogenase	succsal[c] + nad[c] + h2o[c] -> succ[c] + nadh[c] + 2 h[c]	(GL23356-R1)	GL23356-R1	GABD	Carbohydrate metabolism: Butanoate metabolism	0	0	1000	0		1.2.1.16
GL0187	Acetolactate synthase, mitochondrial	2 pyr[m] + h[m] -> alac[m] + co2[m]	(GL25661-R1 and GL24759-R1)	GL25661-R1 GL24759-R1	(ILVH and ILVB)	Carbohydrate metabolism: Butanoate metabolism	0	0	1000	0		2.2.1.6
GL0188	Hydroxymethylglutaryl CoA synthase	aaccoa[c] + accoa[c] + h2o[c] <=> h3mcoa[c] + coa[c] + h[c]	(GL24922-R1)	GL24922-R1	-ERG	Carbohydrate metabolism: Butanoate metabolism	1	-1000	1000	0		2.3.3.10
GL0189	4-Aminobutyrate aminotransferase	gaba[m] + akg[m] <=> succsal[m] + glu[m]	(GL16711-R1)	GL16711-R1	ABAT	Carbohydrate metabolism: Butanoate metabolism	1	-1000	1000	0		2.6.1.19
GL0190	3-Oxoacid CoA-transferase	actac[m] + succoa[m] <=> aaccoa[m] + succ[m]	(GL24584-R1) or (GL24584-R2)	GL24584-R1 GL24584-R2	(OXCT1 or OXCT2)	Carbohydrate metabolism: Butanoate metabolism	1	-1000	1000	0		2.8.3.5
GL0191	Hydroxymethylglutaryl-CoA lyase	h3mcoa[m] -> accoa[m] + actac[m]	(GL21047-R1)	GL21047-R1	HMGCL	Carbohydrate metabolism: Butanoate metabolism	0	0	1000	0		4.1.3.4
GL0192	Enoyl-CoA hydratase	c4hcoa[c] <=> c4dcoa[c] + h2o[c]	(GL27016-R1)	GL27016-R1	ECHS1	Carbohydrate metabolism: Butanoate metabolism	1	-1000	1000	0		4.2.1.17
GL0193	spontaneous reaction	alac[m] + fad[m] + h[m] -> dac[m] + fadh2[m] + co2[m]				Carbohydrate metabolism: Butanoate metabolism	0	0	1000	0
GL0194	Acetoacetate-CoA ligase	actac[m] + atp[m] + coa[m] -> aaccoa[m] + amp[m] + ppi[m]	(GL31671-R1)	GL31671-R1	AACS	Carbohydrate metabolism: Butanoate metabolism	0	0	1000	0		6.2.1.16
GL0195	Myo-inositol oxygenase	ins[c] + o2[c] -> ga[c] + h2o[c] + h[c]	(GL22603-R1)	GL22603-R1	MIOX	Carbohydrate metabolism: Inositol Phosphate Metabolism	0	0	1000	0		1.13.99.1
GL0196	1-phosphatidylinositol 3-kinase	pins[c] + atp[c] + h[c] -> pinsp[c] + adp[c]	(GL26078-R1)	GL26078-R1	VPS34	Carbohydrate metabolism: Inositol Phosphate Metabolism	0	0	1000	0		2.7.1.137
GL0197	1-Phosphatidylinositol-3-phosphate 5-kinase	pinsp[c] + atp[c] + h[c] -> pyi35bp[c] + adp[c]	(GL30690-R1)	GL30690-R1	FAB1	Carbohydrate metabolism: Inositol Phosphate Metabolism	0	0	1000	0		2.7.1.150
GL0198	Inositol-polyphosphate multikinase	tpi[c] + atp[c] -> tkpi[c] + adp[c] + h[c]	(GL22816-R1)	GL22816-R1	IPMK	Carbohydrate metabolism: Inositol Phosphate Metabolism	0	0	1000	0		2.7.1.151
GL0199	Inositol-polyphosphate multikinase	tkpi[c] + atp[c] -> pkpi[c] + adp[c] + h[c]	(GL22816-R1)	GL22816-R1	IPMK	Carbohydrate metabolism: Inositol Phosphate Metabolism	0	0	1000	0		2.7.1.151
GL0200	Inositol-pentakisphosphate 2-kinase	pkpi[c] + atp[c] -> pha[c] + adp[c] + h[c]	(GL24708-R1)	GL24708-R1	IPPK	Carbohydrate metabolism: Inositol Phosphate Metabolism	0	0	1000	0		2.7.1.158
GL0201	Phosphatidylinositol 4-kinase	pinsp[c] + atp[c] + h[c] -> pins4p[c] + adp[c]	(GL19812-R1) or (GL24637-R1) or (GL25162-R1)	GL19812-R1 GL24637-R1 GL25162-R1	(PIK1.1 or PI4P2 or PIK1.2)	Carbohydrate metabolism: Inositol Phosphate Metabolism	0	0	1000	0		2.7.1.67
GL0202	Phosphatidylinositol-4-phosphate 5-kinase	pins4p[c] + atp[c] + h[c] -> d45pi[c] + adp[c]	(GL28776-R1)	GL28776-R1	PIP5K	Carbohydrate metabolism: Inositol Phosphate Metabolism	0	0	1000	0		2.7.1.68
GL0203	Myo-inositol-1(or 4)-monophosphatase	mi4p[c] + h2o[c] -> ins[c] + pi[c]	(GL30390-R1)	GL30390-R1	IPMA	Carbohydrate metabolism: Inositol Phosphate Metabolism	0	0	1000	0		3.1.3.25
GL0204	Myo-inositol-1(or 4)-monophosphatase	mi3p[c] + h2o[c] -> ins[c] + pi[c]	(GL30390-R1)	GL30390-R1	IPMA	Carbohydrate metabolism: Inositol Phosphate Metabolism	0	0	1000	0		3.1.3.25
GL0205	Myo-inositol-1(or 4)-monophosphatase	mi1p[c] + h2o[c] -> ins[c] + pi[c]	(GL30390-R1)	GL30390-R1	IPMA	Carbohydrate metabolism: Inositol Phosphate Metabolism	0	0	1000	0		3.1.3.25
GL0206	Phosphatidylinositol-bisphosphatase	d45pi[c] + h2o[c] -> pins4p[c] + pi[c] + 2 h[c]	(GL29878-R1) or (GL20523-R1) or (GL20523-R2)	GL29878-R1 GL20523-R1 GL20523-R2	(PBP2 or PBP1.1 or PBP1.2)	Carbohydrate metabolism: Inositol Phosphate Metabolism	0	0	1000	0		3.1.3.36
GL0207	Inositol-1,4,5-trisphosphate 5-phosphatase	tpi[c] + h2o[c] -> myobispi[c] + pi[c]	(GL31180-R1)	GL31180-R1	INP	Carbohydrate metabolism: Inositol Phosphate Metabolism	0	0	1000	0		3.1.3.56
GL0208	Inositol-1,4-bisphosphate 1-phosphatase	myobispi[c] + h2o[c] -> mi4p[c] + pi[c]				Carbohydrate metabolism: Inositol Phosphate Metabolism	0	0	1000	0		3.1.3.57
GL0209	Phytase	pha[c] + h2o[c] -> pkpi[c] + pi[c]	(GL20891-R1) or (GL31401-R1)	GL20891-R1 GL31401-R1	PHYB or PHYA)	Carbohydrate metabolism: Inositol Phosphate Metabolism	0	0	1000	0		3.1.3.8
GL0210	1-Phosphatidylinositol-4,5-bisphosphate phosphodiesterase	d45pi[c] + h2o[c] -> dagly[c] + tpi[c] + h[c]	(GL20551-R1)	GL20551-R1	PLCD	Carbohydrate metabolism: Inositol Phosphate Metabolism	0	0	1000	0		3.1.4.11
GL0211	1-Phosphatidylinositol phosphodiesterase	pins[c] -> mi1p[c] + dagly[c]	(GL27720-R1)	GL27720-R1	PLC	Carbohydrate metabolism: Inositol Phosphate Metabolism	0	0	1000	0		4.6.1.13
GL0212	Myo-Inositol-1-phosphate synthase	g6p[c] -> mi3p[c]	(GL22711-R1)	GL22711-R1	INO1	Carbohydrate metabolism: Inositol Phosphate Metabolism	0	0	1000	0		5.5.1.4
GL0213	NADPH-dependent glutamate synthase	akg[c] + gln[c] + h[c] + nadph[c] -> 2 glu[c] + nadp[c]	(GL19823-R1)	GL19823-R1	GLT1	Amino acid metabolism: Alanine, aspartate and glutamate metabolism	0	0	1000	0		1.4.1.13
GL0214	NADH-dependent glutamate synthase	akg[c] + gln[c] + h[c] + nadh[c] -> 2 glu[c] + nad[c]	(GL19823-R1)	GL19823-R1	GLT1	Amino acid metabolism: Alanine, aspartate and glutamate metabolism	0	0	1000	0		1.4.1.14
GL0215	Glutamate dehydrogenase (NAD)	glu[c] + h2o[c] + nad[c] <=> akg[c] + h[c] + nadh[c] + nh3[c]	(GL17170-R1) or (GL28567-R1)	GL17170-R1 GL28567-R1	(GDH2 or DHE2)	Amino acid metabolism: Alanine, aspartate and glutamate metabolism	1	-1000	1000	0		1.4.1.2
GL0216	Aspartate carbamoyltransferase	asp[c] + cap[c] -> caasp[c] + h[c] + pi[c]	(GL17430-R1)	GL17430-R1	URA2	Amino acid metabolism: Alanine, aspartate and glutamate metabolism	0	0	1000	0		2.1.3.2
GL0217	Glutamine phosphoribosyldiphosphate amidotransferase	gln[c] + h2o[c] + prpp[c] -> glu[c] + pram[c] + ppi[c]	(GL19776-R1) or (GL28502-R1)	GL19776-R1 GL28502-R1	(PPAT or PUR1)	Amino acid metabolism: Alanine, aspartate and glutamate metabolism	0	0	1000	0		2.4.2.14
GL0218	Aspartate aminotransferase	asp[c] + akg[c] <=> glu[c] + oaa[c]	(GL24851-R1) or (GL30239-R1)	GL24851-R1 GL30239-R1	(GOT1 or GOT2)	Amino acid metabolism: Alanine, aspartate and glutamate metabolism	1	-1000	1000	0		2.6.1.1
GL0219	Alanine transaminase	akg[m] + ala[m] -> glu[m] + pyr[m]	(GL20990-R1)	GL20990-R1	GPT	Amino acid metabolism: Alanine, aspartate and glutamate metabolism	0	0	1000	0		2.6.1.2
GL0220	L-Asparaginase	asn[c] + h2o[c] -> asp[c] + nh3[c]	(GL17190-R1) or (GL24415-R1) or (GL17288-R1)	GL17190-R1 GL24415-R1 GL17288-R1	(ANSA1.1 or ANSA1.2 or ANSB)	Amino acid metabolism: Alanine, aspartate and glutamate metabolism	0	0	1000	0		3.5.1.1
GL0221	Glutaminase	gln[c] + h2o[c] -> glu[c] + nh3[c]	(GL31664-R1) or (GL31665-R1)	GL31664-R1 GL31665-R1	(GLSA1.1 or GLSA1.2)	Amino acid metabolism: Alanine, aspartate and glutamate metabolism	0	0	1000	0		3.5.1.2
GL0222	Argininosuccinate lyase	argsucc[c] -> arg[c] + fum[c]	(GL24849-R1)	GL24849-R1	ARGH	Amino acid metabolism: Alanine, aspartate and glutamate metabolism	0	0	1000	0		4.3.2.1
GL0223	Adenylsuccinate lyase	asuc[c] <=> amp[c] + fum[c]	(GL22628-R1)	GL22628-R1	ADSL	Amino acid metabolism: Alanine, aspartate and glutamate metabolism	1	-1000	1000	0		4.3.2.2
GL0224	Adenylosuccinate lyase	saicar[c] <=> aicar[c] + fum[c]	(GL22628-R1)	GL22628-R1	ADSL	Amino acid metabolism: Alanine, aspartate and glutamate metabolism	1	-1000	1000	0		4.3.2.2
GL0225	Glutamine synthetase	atp[c] + glu[c] + nh3[c] -> adp[c] + gln[c] + h[c] + pi[c]	(GL24603-R1) or (GL31204-R1)	GL24603-R1 GL31204-R1	(GLNA1.1 or GLNA1.2)	Amino acid metabolism: Alanine, aspartate and glutamate metabolism	0	0	1000	0		6.3.1.2
GL0226	Adenylosuccinate synthase	asp[c] + gtp[c] + imp[c] -> asuc[c] + gdp[c] + 2 h[c] + pi[c]	(GL24804-R1)	GL24804-R1	PURA	Amino acid metabolism: Alanine, aspartate and glutamate metabolism	0	0	1000	0		6.3.4.4
GL0227	Argininosuccinate synthase	asp[c] + citr[c] + atp[c] -> argsucc[c] + amp[c] + h[c] + ppi[c]	(GL29631-R1)	GL29631-R1	ARGG	Amino acid metabolism: Alanine, aspartate and glutamate metabolism	0	0	1000	0		6.3.4.5
GL0228	Glutamine-hydrolyzing asparagine synthase	asp[c] + gln[c] + atp[c] + h2o[c] -> asn[c] + glu[c] + amp[c] + h[c] + ppi[c]	(GL28557-R1)	GL28557-R1	ASNB	Amino acid metabolism: Alanine, aspartate and glutamate metabolism	0	0	1000	0		6.3.5.4
GL0229	Carbamoyl-phosphate synthase (glutamine-hydrolysing)	gln[c] + 2 atp[c] + h2o[c] + hco3[c] -> glu[c] + 2 adp[c] + cap[c] + 2 h[c] + pi[c]	(GL17430-R1) or (GL21533-R1) or (GL25578-R1)	GL17430-R1 GL21533-R1 GL25578-R1	(URA2 or CARB or CARA)	Amino acid metabolism: Alanine, aspartate and glutamate metabolism	0	0	1000	0		6.3.5.5
GL0230	Carnitine O-acetyltransferase	accoa[c] + car[c] -> coa[c] + acar[c]	(GL23796-R1) or (GL23438-R1)	GL23796-R1 GL23438-R1	(COT1.2 or COT1.3)	Amino acid metabolism: Alanine, aspartate and glutamate metabolism	0	0	1000	0		2.3.1.7
GL0231	Carnitine O-acetyltransferase	coa[m] + acar[m] -> accoa[m] + car[m]	(GL20271-R1) or (GL23796-R1) or (GL23438-R1)	GL20271-R1 GL23796-R1 GL23438-R1	(COT1.1 or COT1.2 or COT1.3)	Amino acid metabolism: Alanine, aspartate and glutamate metabolism	0	0	1000	0		2.3.1.7
GL0232	3-Hydroxy acid dehydrogenase	all[c] + nadp[c] -> aaac[c] + nadph[c] + h[c]	(GL24625-R1)	GL24625-R1	YDFG	Amino acid metabolism: Glycine, serine and threonine metabolism	0	0	1000	0		1.1.1.381
GL0233	Glyoxylate/hydroxypyruvate reductase	g[c] + nad[c] <=> hpyr[c] + nadh[c] + h[c]	(GL17003-R1)	GL17003-R1	GRHPR	Amino acid metabolism: Glycine, serine and threonine metabolism	1	-1000	1000	0		1.1.1.81
GL0234	D-3-Phosphoglycerate dehydrogenase	3pg[c] + nad[c] <=> php[c] + h[c] + nadh[c]	(GL29711-R1)	GL29711-R1	PHGDH	Amino acid metabolism: Glycine, serine and threonine metabolism	1	-1000	1000	0		1.1.1.95
GL0235	Primary-amine oxidase	aacn[c] + h2o[c] + o2[c] -> mthgxl[c] + nh3[c] + h2o2[c]	(GL22246-R1) or (GL27396-R1) or (GL22112-R1)	GL22246-R1 GL27396-R1 GL22112-R1	(AOC3.1 or AOC3.2 or AOC2)	Amino acid metabolism: Glycine, serine and threonine metabolism	0	0	1000	0		1.4.3.21
GL0236	D-Amino-acid oxidase	gly[c] + h2o[c] + o2[c] -> glx[c] + nh3[c] + h2o2[c]	(GL24057-R1) or (GL30084-R1) or (GL30084-R2) or (GL30084-R3)	GL24057-R1 GL30084-R1 GL30084-R2 GL30084-R3	(DAO or OXDA1.1 or OXDA1.2 or OXDA1.3)	Amino acid metabolism: Glycine, serine and threonine metabolism	0	0	1000	0		1.4.3.3
GL0237	Glycine-cleavage complex (lipoamide), mitochondrial	metthf[m] + co2[m] + nadh[m] + nh3[m] <=> gly[m] + thf[m] + nad[m]	(GL29724-R1 and GL22957-R1 and GL21912-R1) or (GL30993-R1)	GL29724-R1 GL22957-R1 GL21912-R1 GL30993-R1	((GLDC and GCVT and DLD) or GCVH)	Amino acid metabolism: Glycine, serine and threonine metabolism	1	-1000	1000	0		1.4.4.2 2.1.2.10 1.8.1.4
GL0238	Glycine hydroxymethyltransferase	thf[c] + ser[c] <=> metthf[c] + gly[c] + h2o[c]	(GL28298-R1)	GL28298-R1	GLYA	Amino acid metabolism: Glycine, serine and threonine metabolism	1	-1000	1000	0		2.1.2.1
GL0239	5-Aminolevulinic acid synthase	gly[m] + succoa[m] + h[m] -> amievul[m] + co2[m] + coa[m]	(GL20401-R1)	GL20401-R1	ALAS	Amino acid metabolism: Glycine, serine and threonine metabolism	0	0	1000	0		2.3.1.37
GL0240	Serine-pyruvate transaminase	ser[c] + pyr[c] -> hpyr[c] + ala[c]	(GL21921-R1)	GL21921-R1	AGXT	Amino acid metabolism: Glycine, serine and threonine metabolism	0	0	1000	0		2.6.1.51
GL0241	Serine-glyoxylate transaminase	ser[c] + glx[c] <=> hpyr[c] + gly[c]	(GL21921-R1)	GL21921-R1	AGXT	Amino acid metabolism: Glycine, serine and threonine metabolism	1	-1000	1000	0		2.6.1.45
GL0242	Alanine-glyoxylate transaminase	ala[c] + glx[c] <=> pyr[c] + gly[c]	(GL21921-R1)	GL21921-R1	AGXT	Amino acid metabolism: Glycine, serine and threonine metabolism	1	-1000	1000	0		2.6.1.44
GL0243	Phosphoserine aminotransferase	php[c] + glu[c] <=> akg[c] + 3pser[c]	(GL24824-R1)	GL24824-R1	PSAT1	Amino acid metabolism: Glycine, serine and threonine metabolism	1	-1000	1000	0		2.6.1.52
GL0244	phosphoserine phosphatase	h2o[c] + 3pser[c] -> pi[c] + ser[c]				Amino acid metabolism: Glycine, serine and threonine metabolism	0	0	1000	0		3.1.3.3
GL0245	D-Glycerate 3-kinase	g[c] + atp[c] -> 3pg[c] + adp[c] + h[c]	(GL15607-R1)	GL15607-R1	GLYK	Amino acid metabolism: Glycine, serine and threonine metabolism	0	0	1000	0		2.7.1.31
GL0246	Homoserine kinase	atp[c] + hser[c] -> adp[c] + h[c] + phser[c]	(GL29655-R1)	GL29655-R1	THRB1	Amino acid metabolism: Glycine, serine and threonine metabolism	0	0	1000	0		2.7.1.39
GL0247	Threonine aldolase	acal[c] + gly[c] <=> thr[c]	(GL30477-R1)	GL30477-R1	ITAE	Amino acid metabolism: Glycine, serine and threonine metabolism	1	-1000	1000	0		4.1.2.5
GL0248	Threonine aldolase	all[c] <=> gly[c] + acal[c]	(GL30477-R1)	GL30477-R1	ITAE	Amino acid metabolism: Glycine, serine and threonine metabolism	1	-1000	1000	0		4.1.2.5
GL0249	Bifunctional tryptophan synthase	ga3p[c] + h2o[c] + trp[c] <=> igp[c] + ser[c]	(GL24792-R1)	GL24792-R1	TRP1	Amino acid metabolism: Glycine, serine and threonine metabolism	1	-1000	1000	0		4.2.1.20
GL0250	Threonine synthase	phser[c] + h2o[c] -> thr[c] + pi[c]	(GL15154-R1) or (GL20896-R1)	GL15154-R1 GL20896-R1	(THRC1.1 or THRC1.2)	Amino acid metabolism: Glycine, serine and threonine metabolism	0	0	1000	0		4.2.3.1
GL0251	L-Serine ammonia-lyase	ser[c] -> pyr[c] + nh3[c]	(GL26683-R1 and GL26682-R1)	GL26683-R1 GL26682-R1	(SDS1.1 and SDS1.2))	Amino acid metabolism: Glycine, serine and threonine metabolism	0	0	1000	0		4.3.1.17
GL0252	L-Serine ammonia-lyase	ser[m] -> pyr[m] + nh3[m]	(GL26683-R1 and GL26682-R1)	GL26683-R1 GL26682-R1	(SDS1.1 and SDS1.2))	Amino acid metabolism: Glycine, serine and threonine metabolism	0	0	1000	0		4.3.1.17
GL0253	L-Threonine ammonia-lyase	thr[c] -> obut[c] + nh3[c]	(GL26683-R1 and GL26682-R1) or (GL17594-R1)	GL17594-R1 GL26683-R1 GL26682-R1	(ILVA or (SDS1.1 and SDS1.2))	Amino acid metabolism: Glycine, serine and threonine metabolism	0	0	1000	0		4.3.1.19
GL0254	L-Threonine ammonia-lyase	thr[m] -> obut[m] + nh3[m]	(GL26683-R1 and GL26682-R1)	GL26683-R1 GL26682-R1	(SDS1.1 and SDS1.2))	Amino acid metabolism: Glycine, serine and threonine metabolism	0	0	1000	0		4.3.1.19
GL0255	spontaneous reaction	aaac[c] + h[c] -> aacn[c] + co2[c]				Amino acid metabolism: Glycine, serine and threonine metabolism	0	0	1000	0
GL0256	Homoserine dehydrogenase (NAD)	aspsa[c] + h[c] + nadh[c] -> hser[c] + nad[c]	(GL22515-R1)	GL22515-R1	HOM6	Amino acid metabolism: Cysteine and methionine metabolism	0	0	1000	0		1.1.1.3
GL0257	Homoserine dehydrogenase (NADP)	aspsa[c] + h[c] + nadph[c] -> hser[c] + nadp[c]	(GL22515-R1)	GL22515-R1	HOM6	Amino acid metabolism: Cysteine and methionine metabolism	0	0	1000	0		1.1.1.3
GL0258	Acireductone dioxygenase	dmpeno[c] + o2[c] -> mob[c] + for[c] + h[c]	(GL16081-R1)	GL16081-R1	MTND	Amino acid metabolism: Cysteine and methionine metabolism	0	0	1000	0		1.13.11.54
GL0259	aspartate aminotransferase	akg[m] + cys[m] <=> glu[m] + mpyr[m]	(GL24851-R1) or (GL30239-R1)	GL24851-R1 GL30239-R1	(GOT1 or GOT2)	Amino acid metabolism: Cysteine and methionine metabolism	1	-1000	1000	0		2.6.1.1
GL0260	aspartate aminotransferase	akg[c] + cys[c] -> glu[c] + mpyr[c]	(GL24851-R1) or (GL30239-R1)	GL24851-R1 GL30239-R1	(GOT1 or GOT2)	Amino acid metabolism: Cysteine and methionine metabolism	0	0	1000	0		2.6.1.1
GL0261	Aspartate-semialdehyde dehydrogenase	basp[c] + h[c] + nadph[c] <=> aspsa[c] + nadp[c] + pi[c]	(GL25035-R1)	GL25035-R1	HOM2	Amino acid metabolism: Cysteine and methionine metabolism	1	-1000	1000	0		1.2.1.11
GL0262	Homocysteine S-methyltransferase	sam[c] + hcys[c] -> sah[c] + met[c] + h[c]	(GL25365-R1)	GL25365-R1	MMUM	Amino acid metabolism: Cysteine and methionine metabolism	0	0	1000	0		2.1.1.10
GL0263	Serine O-acetyltransferase	ser[c] + accoa[c] -> oaser[c] + coa[c]				Amino acid metabolism: Cysteine and methionine metabolism	0	0	1000	0		2.3.1.30
GL0264	Homoserine O-acetyltransferase	accoa[c] + hser[c] -> oahser[c] + coa[c]	(GL20240-R1)	GL20240-R1	METX	Amino acid metabolism: Cysteine and methionine metabolism	0	0	1000	0		2.3.1.31
GL0265	Homoserine O-acetyltransferase	accoa[m] + hser[m] -> oahser[m] + coa[m]	(GL31683-R1)	GL31683-R1	METX	Amino acid metabolism: Cysteine and methionine metabolism	0	0	1000	0		2.3.1.31
GL0266	5'-Methylthioadenosine phosphorylase	5mta[c] + pi[c] + h[c] -> mthrip[c] + ad[c]	(GL26667-R1)	GL26667-R1	MTAP	Amino acid metabolism: Cysteine and methionine metabolism	0	0	1000	0		2.4.2.28
GL0267	Cysteine synthase A	oaser[c] + h2s[c] -> cys[c] + ac[c] + h[c]	(GL16715-R1) or (GL17604-R1)	GL16715-R1 GL17604-R1	(CYSK1.1 or CYSK1.2)	Amino acid metabolism: Cysteine and methionine metabolism	0	0	1000	0		2.5.1.47
GL0268	Cystathionine gamma-synthase	succhomo[c] + cys[c] -> llct[c] + succ[c] + h[c]	(GL27621-R1) or (GL31606-R1)	GL27621-R1 GL31606-R1	(METB1.1 or METB1.2)	Amino acid metabolism: Cysteine and methionine metabolism	0	0	1000	0		2.5.1.48
GL0269	Cystathionine gamma-synthase	succhomo[c] + h2o[c] -> obut[c] + succ[c] + nh3[c] + h[c]	(GL27621-R1) or (GL31606-R1)	GL27621-R1 GL31606-R1	(METB1.1 or METB1.2)	Amino acid metabolism: Cysteine and methionine metabolism	0	0	1000	0		2.5.1.48
GL0270	Cystathionine gamma-synthase	oahser[c] + cys[c] -> llct[c] + ac[c] + h[c]	(GL27621-R1) or (GL31606-R1)	GL27621-R1 GL31606-R1	(METB1.1 or METB1.2)	Amino acid metabolism: Cysteine and methionine metabolism	0	0	1000	0		2.5.1.48
GL0271	Cystathionine gamma-synthase	succhomo[c] + h2s[c] -> hcys[c] + succ[c] + h[c]	(GL27621-R1) or (GL31606-R1)	GL27621-R1 GL31606-R1	(METB1.1 or METB1.2)	Amino acid metabolism: Cysteine and methionine metabolism	0	0	1000	0		2.5.1.48
GL0272	O-Acetylhomoserine (thiol)-lyase	oahser[c] + h2s[c] -> hcys[c] + ac[c] + h[c]	(GL23034-R1) or (GL23038-R1) or (GL27621-R1) or (GL31606-R1)	GL23034-R1 GL23038-R1 GL27621-R1 GL31606-R1	(MET17.1 or MET17.2 or METB1.1 or METB1.2)	Amino acid metabolism: Cysteine and methionine metabolism	0	0	1000	0		2.5.1.49 2.5.1.48
GL0273	Methionine adenosyltransferase	met[c] + atp[c] + h2o[c] -> sam[c] + pi[c] + ppi[c]	(GL22548-R1) or (GL24644-R1)	GL22548-R1 GL24644-R1	(METK1.1 or METK1.2)	Amino acid metabolism: Cysteine and methionine metabolism	0	0	1000	0		2.5.1.6
GL0274	Tyrosine transaminase	mob[c] + glu[c] -> met[c] + akg[c]	(GL24771-R1) or (GL31258-R1) or (GL20994-R1)	GL24771-R1 GL31258-R1 GL20994-R1	(ARO8.1 or ARO8.2 or ARO8.3)	Amino acid metabolism: Cysteine and methionine metabolism	0	0	1000	0		2.6.1.5
GL0275	Aspartate kinase	asp[c] + atp[c] <=> basp[c] + adp[c]	(GL24115-R1)	GL24115-R1	HOM3	Amino acid metabolism: Cysteine and methionine metabolism	1	-1000	1000	0		2.7.2.4
GL0276	3-Mercaptopyruvate sulfurtransferase	mpyr[m] + slfi[m] -> tslf[m] + pyr[m]	(GL30208-R1)	GL30208-R1	TST	Amino acid metabolism: Cysteine and methionine metabolism	0	0	1000	0		2.8.1.2
GL0277	Cystathionine beta-synthase	hcys[c] + ser[c] -> llct[c] + h2o[c]	(GL21781-R1)	GL21781-R1	CBS	Amino acid metabolism: Cysteine and methionine metabolism	0	0	1000	0		4.2.1.22
GL0278	Cystathionine beta-synthase	ser[c] + h2s[c] -> cys[c] + h2o[c]	(GL21781-R1)	GL21781-R1	CBS	Amino acid metabolism: Cysteine and methionine metabolism	0	0	1000	0		4.2.1.22
GL0279	hydrogen-sulfide-lyase	cys[c] + h2o[c] -> pyr[c] + h2s[c] + nh3[c]	(GL22139-R1) or (GL17879-R1)	GL22139-R1 GL17879-R1	(CTH or METC)	Amino acid metabolism: Cysteine and methionine metabolism	0	0	1000	0		4.4.1.1 4.4.1.8
GL0280	Cystathionine gamma-lyase	llct[c] + h2o[c] <=> nh3[c] + cys[c] + obut[c]	(GL22139-R1)	GL22139-R1	CTH	Amino acid metabolism: Cysteine and methionine metabolism	1	-1000	1000	0		4.4.1.1
GL0281	Cystathionine beta-lyase	llct[c] + h2o[c] -> hcys[c] + pyr[c] + nh3[c]	(GL17879-R1)	GL17879-R1	METC	Amino acid metabolism: Cysteine and methionine metabolism	0	0	1000	0		4.4.1.8
GL0282	Methylthioribose-1-phosphate isomerase	mthrip[c] -> mtrip[c] + h[c]	(GL25255-R1) or (GL25255-R2)	GL25255-R1 GL25255-R2	(MTNA1.1 or MTNA1.2)	Amino acid metabolism: Cysteine and methionine metabolism	0	0	1000	0		5.3.1.23
GL0283	Cysteine dioxygenase	o2[c] + cys[c] -> h[c] + 3sulala[c]				Amino acid metabolism: Cysteine and methionine metabolism	0	0	1000	0		1.13.11.20
GL0284	L-aspartate:2-oxoglutarate aminotransferase	akg[c] + 3sulala[c] -> glu[c] + 3sulpyr[c]	(GL24851-R1) or (GL30239-R1)	GL24851-R1 GL30239-R1	(GOT1 or GOT2)	Amino acid metabolism: Cysteine and methionine metabolism	0	0	1000	0		2.6.1.1	KAAS
GL0285	L-aspartate:2-oxoglutarate aminotransferase	akg[m] + 3sulala[m] -> glu[m] + 3sulpyr[m]	(GL24851-R1) or (GL30239-R1)	GL24851-R1 GL30239-R1	(GOT1 or GOT2)	Amino acid metabolism: Cysteine and methionine metabolism	0	0	1000	0		2.6.1.1	KAAS
GL0286	non-enzymatic	h2o[c] + 3sulpyr[c] -> pyr[c] + slfi[c]				Amino acid metabolism: Cysteine and methionine metabolism	0	0	1000	0
GL0287	Methionine synthase	hcys[c] + mthf[c] -> met[c] + thf[c]	(GL25661-R1) or (GL24759-R1)	GL25661-R1 GL24759-R1		Amino acid metabolism: Cysteine and methionine metabolism	0	0	1000	0		2.1.1.13 2.2.1.6
GL0288	adenosylhomocysteinase	h2o[c] + sah[c] <=> hcys[c] + adn[c]				Amino acid metabolism: Cysteine and methionine metabolism	1	-1000	1000	0		3.3.1.1	biopath
GL0289	3-Isopropylmalate dehydrogenase	cbhcap[c] + nad[c] <=> oicap[c] + h[c] + nadh[c]	(GL31360-R1)	GL31360-R1	LEUB	Amino acid metabolism: Valine, leucine and isoleucine biosynthesis	1	-1000	1000	0		1.1.1.85
GL0290	3-Isopropylmalate dehydrogenase	emmal[c] + nad[c] -> obut[c] + co2[c] + nadh[c]	(GL31360-R1)	GL31360-R1	LEUB	Amino acid metabolism: Valine, leucine and isoleucine biosynthesis	0	0	1000	0		1.1.1.85
GL0291	Ketol-acid reductoisomerase	dmvat[m] + nadp[m] <=> rhmopt[m] + nadph[m] + h[m]	(GL25971-R1)	GL25971-R1	ILVC	Amino acid metabolism: Valine, leucine and isoleucine biosynthesis	1	-1000	1000	0		1.1.1.86
GL0292	Ketol-acid reductoisomerase	hmobut[m] + nadph[m] + h[m] <=> dmbut[m] + nadp[m]	(GL25971-R1)	GL25971-R1	ILVC	Amino acid metabolism: Valine, leucine and isoleucine biosynthesis	1	-1000	1000	0		1.1.1.86
GL0293	Ketol-acid reductoisomerase	abut[m] <=> rhmopt[m]	(GL25971-R1)	GL25971-R1	ILVC	Amino acid metabolism: Valine, leucine and isoleucine biosynthesis	1	-1000	1000	0		1.1.1.86
GL0294	Ketol-acid reductoisomerase	alac[m] <=> hmobut[m]	(GL25971-R1)	GL25971-R1	ILVC	Amino acid metabolism: Valine, leucine and isoleucine biosynthesis	1	-1000	1000	0		1.1.1.86
GL0295	2-Aceto-2-hydroxybutanoate synthase, mitochondrial	obut[m] + pyr[m] + h[m] -> abut[m] + co2[m]	(GL25661-R1 and GL24759-R1)	GL25661-R1 GL24759-R1	(ILVH and ILVB)	Amino acid metabolism: Valine, leucine and isoleucine biosynthesis	0	0	1000	0		2.2.1.6
GL0296	Acetyl-CoA C-acyltransferase (2-Methyl-3-acetoacetyl-CoA)	maacoa[c] + coa[c] <=> accoa[c] + ppcoa[c]	(GL26574-R1)	GL26574-R1	ATOB	Amino acid metabolism: Valine, leucine and isoleucine biosynthesis	1	-1000	1000	0		2.3.1.9
GL0297	Branched-chain amino acid aminotransferase II	4mop[c] + glu[c] <=> akg[c] + leu[c]	(GL29910-R1)	GL29910-R1	ILVE2	Amino acid metabolism: Valine, leucine and isoleucine biosynthesis	1	-1000	1000	0		2.6.1.42
GL0298	Branched-chain amino acid aminotransferase II	3mop[c] + glu[c] <=> akg[c] + ile[c]	(GL29910-R1)	GL29910-R1	ILVE2	Amino acid metabolism: Valine, leucine and isoleucine biosynthesis	1	-1000	1000	0		2.6.1.42
GL0299	Branched-chain amino acid aminotransferase II	omval[c] + glu[c] -> akg[c] + val[c]	(GL29910-R1)	GL29910-R1	ILVE2	Amino acid metabolism: Valine, leucine and isoleucine biosynthesis	0	0	1000	0		2.6.1.42
GL0300	Branched-chain amino acid aminotransferase II	4mop[m] + glu[m] -> akg[m] + leu[m]	(GL18545-R1)	GL18545-R1	ILVE1	Amino acid metabolism: Valine, leucine and isoleucine biosynthesis	0	0	1000	0		2.6.1.42
GL0301	Branched-chain amino acid aminotransferase II	3mop[m] + glu[m] -> akg[m] + ile[m]	(GL18545-R1)	GL18545-R1	ILVE1	Amino acid metabolism: Valine, leucine and isoleucine biosynthesis	0	0	1000	0		2.6.1.42
GL0302	Branched-chain amino acid aminotransferase II	oicap[c] + h[c] -> 4mop[c] + co2[c]	(GL29910-R1)	GL29910-R1	ILVE2	Amino acid metabolism: Valine, leucine and isoleucine biosynthesis	0	0	1000	0		2.6.1.42
GL0303	Branched-chain amino acid aminotransferase II	oicap[m] + h[m] -> 4mop[m] + co2[m]	(GL18545-R1)	GL18545-R1	ILVE1	Amino acid metabolism: Valine, leucine and isoleucine biosynthesis	0	0	1000	0		2.6.1.42
GL0304	2-Isopropylmalate hydro-lyase	ippmal[c] <=> ppmal[c] + h2o[c]	(GL26795-R1)	GL26795-R1	LEU1	Amino acid metabolism: Valine, leucine and isoleucine biosynthesis	1	-1000	1000	0		4.2.1.33
GL0305	3-Isopropylmalate hydro-lyase	ppmal[c] + h2o[c] <=> cbhcap[c]	(GL26795-R1)	GL26795-R1	LEU1	Amino acid metabolism: Valine, leucine and isoleucine biosynthesis	1	-1000	1000	0		4.2.1.33
GL0306	Dihydroxy-acid and 6-phosphogluconate dehydratase	dmvat[m] -> 3mop[m] + h2o[m]	(GL19372-R1) or (GL23768-R1)	GL19372-R1 GL23768-R1	(ILVD1.1 or ILCD1.2)	Amino acid metabolism: Valine, leucine and isoleucine biosynthesis	0	0	1000	0		4.2.1.9
GL0307	3-Hydroxyacyl-CoA dehydrogenase	metbycoa[m] + nad[m] <=> maacoa[m] + nadh[m] + h[m]				Amino acid metabolism: Valine, leucine and isoleucine degradation	1	-1000	1000	0		1.1.1.35
GL0308	3-Hydroxyacyl-CoA dehydrogenase	hyisorate[m] + nad[m] <=> mmsal[m] + nadh[m] + h[m]				Amino acid metabolism: Valine, leucine and isoleucine degradation	1	-1000	1000	0		1.1.1.35
GL0309	Malonate-semialdehyde dehydrogenase	mmsal[m] + coa[m] + nad[m] -> ppcoa[m] + co2[m] + nadh[m]	(GL30044-R1)	GL30044-R1	MMSA	Amino acid metabolism: Valine, leucine and isoleucine degradation	0	0	1000	0		1.2.1.27
GL0310	Aldehyde Dehydrogenase	mmsal[c] + nad[c] + h2o[c] -> mmal[c] + nadh[c] + 2 h[c]	(GL30174-R1) or (GL24130-R1)	GL30174-R1 GL24130-R1	(ALD1.1 or ALD1.2)	Amino acid metabolism: Valine, leucine and isoleucine degradation	0	0	1000	0		1.2.1.3
GL0311	Aldehyde Dehydrogenase	mmsal[m] + nad[m] + h2o[m] -> mmal[m] + nadh[m] + 2 h[m]	(GL26572-R1) or (GL26572-R1) or (GL18415-R1) or (GL27033-R1)	GL26572-R1 GL26572-R1 GL18415-R1 GL27033-R1	(ALD1.3 or ALD1.4 or ALD1.5 or ALD1.6)	Amino acid metabolism: Valine, leucine and isoleucine degradation	0	0	1000	0		1.2.1.3
GL0312	2-Oxoisovalerate dehydrogenase/Dihydrolipoamide dehydrogenase/Dihydrolipoyl transacylase	4mop[m] + coa[m] + nad[m] -> 3mbcoa[m] + co2[m] + nadh[m]	(GL17247-R1 and GL25070-R1 and GL21912-R1 and GL30409-R1)	GL17247-R1 GL25070-R1 GL21912-R1 GL30409-R1	((BCKDHB and BCKDHA) and DLD and DBT)	Amino acid metabolism: Valine, leucine and isoleucine degradation	0	0	1000	0		1.2.4.4 1.8.1.4 2.3.1.168
GL0313	2-Oxoisovalerate dehydrogenase/Dihydrolipoamide dehydrogenase/Dihydrolipoyl transacylase	3mop[m] + coa[m] + nad[m] -> mbcoa[m] + co2[m] + nadh[m]	(GL17247-R1 and GL25070-R1 and GL21912-R1 and GL30409-R1)	GL17247-R1 GL25070-R1 GL21912-R1 GL30409-R1	((BCKDHB and BCKDHA) and DLD and DBT)	Amino acid metabolism: Valine, leucine and isoleucine degradation	0	0	1000	0		1.2.4.4 1.8.1.4 2.3.1.168
GL0314	2-Oxoisovalerate dehydrogenase/Dihydrolipoamide dehydrogenase/Dihydrolipoyl transacylase	omval[m] + coa[m] + nad[m] -> ibcoa[m] + co2[m] + nadh[m]	(GL17247-R1 and GL25070-R1 and GL21912-R1 and GL30409-R1)	GL17247-R1 GL25070-R1 GL21912-R1 GL30409-R1	((BCKDHB and BCKDHA) and DLD and DBT)	Amino acid metabolism: Valine, leucine and isoleucine degradation	0	0	1000	0		1.2.4.4 1.8.1.4 2.3.1.168
GL0315	Isovaleryl-CoA dehydrogenase	3mbcoa[m] + fad[m] -> mccoa[m] + fadh2[m]	(GL19834-R1)	GL19834-R1	IVD	Amino acid metabolism: Valine, leucine and isoleucine degradation	0	0	1000	0		1.3.8.4
GL0316	Acyl-CoA dehydrogenase	ibcoa[m] + fad[m] <=> maclcoa[m] + fadh2[m]	(GL26706-R1)	GL26706-R1	ACADM	Amino acid metabolism: Valine, leucine and isoleucine degradation	1	-1000	1000	0		1.3.8.7
GL0317	Acyl-CoA dehydrogenase	mbcoa[m] + fad[m] <=> mbecoa[m] + fadh2[m]	(GL26706-R1)	GL26706-R1	ACADM	Amino acid metabolism: Valine, leucine and isoleucine degradation	1	-1000	1000	0		1.3.8.7
GL0318	Acetyl-CoA acyltransferase 1	maacoa[m] + coa[m] -> ppcoa[m] + accoa[m]	(GL30546-R1)	GL30546-R1	ACAA1	Amino acid metabolism: Valine, leucine and isoleucine degradation	0	0	1000	0		2.3.1.16
GL0319	3-Hydroxyisobutyryl-CoA hydrolase	hyisocoa[m] + h2o[m] -> hyisorate[m] + coa[m] + h[m]	(GL24616-R1)	GL24616-R1	HIBCH	Amino acid metabolism: Valine, leucine and isoleucine degradation	0	0	1000	0		3.1.2.4
GL0320	(S)-3-Hydroxybutanoyl-CoA hydro-lyase	mccoa[m] + h2o[m] <=> hicoa[m]	(GL27016-R1)	GL27016-R1	ECHS1	Amino acid metabolism: Valine, leucine and isoleucine degradation	1	-1000	1000	0		4.2.1.17
GL0321	(S)-3-Hydroxybutanoyl-CoA hydro-lyase	mbecoa[m] + h2o[m] -> metbycoa[m]	(GL27016-R1)	GL27016-R1	ECHS1	Amino acid metabolism: Valine, leucine and isoleucine degradation	0	0	1000	0		4.2.1.17
GL0322	(S)-3-Hydroxybutanoyl-CoA hydro-lyase	maclcoa[m] + h2o[m] -> hyisocoa[m]	(GL27016-R1)	GL27016-R1	ECHS1	Amino acid metabolism: Valine, leucine and isoleucine degradation	0	0	1000	0		4.2.1.17
GL0323	Methylglutaconyl-CoA hydratase	mgcoa[m] + h2o[m] <=> h3mcoa[m]	(GL20416-R1)	GL20416-R1	AUH	Amino acid metabolism: Valine, leucine and isoleucine degradation	1	-1000	1000	0		4.2.1.18
GL0324	3-Methylcrotonyl-CoA carboxylase	mccoa[m] + atp[m] + hco3[m] -> mgcoa[m] + adp[m] + pi[m] + h[m]	(GL26714-R1 and GL30148-R1)	GL26714-R1 GL30148-R1	(MCCB and MCCA)	Amino acid metabolism: Valine, leucine and isoleucine degradation	0	0	1000	0		6.4.1.4
GL0325	spontaneous reaction	h[m] + oxag[m] <=> oap[m] + co2[m]				Amino acid metabolism: Lysine Biosynthesis	1	-1000	1000	0
GL0326	Homoisocitrate dehydrogenase	hicit[m] + nad[m] <=> oap[m] + co2[m] + nadh[m]	(GL26488-R1) or (GL26488-R2)	GL26488-R1 GL26488-R2	(LYS12.1 or LYS12.2)	Amino acid metabolism: Lysine Biosynthesis	1	-1000	1000	0		1.1.1.87
GL0327	L-Aminoadipate-semialdehyde dehydrogenase (NADPH)	ama[c] + atp[c] + h[c] + nadph[c] -> amasa[c] + amp[c] + nadp[c] + ppi[c]	(GL24047-R1)	GL24047-R1	LYS2	Amino acid metabolism: Lysine Biosynthesis	0	0	1000	0		1.2.1.31
GL0328	L-Aminoadipate-semialdehyde dehydrogenase (NADH)	ama[c] + atp[c] + h[c] + nadh[c] -> amasa[c] + amp[c] + nad[c] + ppi[c]	(GL24047-R1)	GL24047-R1	LYS2	Amino acid metabolism: Lysine Biosynthesis	0	0	1000	0		1.2.1.31
GL0329	L-Aminoadipate-semialdehyde dehydrogenase (NADPH)	ama[m] + atp[m] + h[m] + nadph[m] -> amasa[m] + amp[m] + nadp[m] + ppi[m]	(GL18415-R1)	GL18415-R1	ALDH7A1	Amino acid metabolism: Lysine Biosynthesis	0	0	1000	0		1.2.1.31
GL0330	L-Aminoadipate-semialdehyde dehydrogenase (NADH)	ama[m] + atp[m] + h[m] + nadh[m] -> amasa[m] + amp[m] + nad[m] + ppi[m]	(GL18415-R1)	GL18415-R1	ALDH7A1	Amino acid metabolism: Lysine Biosynthesis	0	0	1000	0		1.2.1.31
GL0331	L-Aminoadipate-semialdehyde dehydrogenase (NADH)	amasa[c] + nad[c] + h2o[c] -> ama[c] + 2 h[c] + nadh[c]	(GL24047-R1)	GL24047-R1	LYS2	Amino acid metabolism: Lysine Biosynthesis	0	0	1000	0		1.2.1.31
GL0332	Glutaryl-CoA dehydrogenase	glucoa[m] + fad[m] + h[m] -> c4dcoa[m] + fadh2[m] + co2[m]	(GL24439-R1)	GL24439-R1	GCDH	Amino acid metabolism: Lysine Biosynthesis	0	0	1000	0		1.3.8.6
GL0333	Saccharopine dehydrogenase	amasa[c] + glu[c] + h[c] + nadph[c] <=> sacp[c] + h2o[c] + nadp[c]	(GL22111-R1)	GL22111-R1	LYS9	Amino acid metabolism: Lysine Biosynthesis	1	-1000	1000	0		1.5.1.10
GL0334	Saccharopine dehydrogenase (NAD+, L-lysine forming)	sacp[c] + h2o[c] + nad[c] <=> akg[c] + lys[c] + h[c] + nadh[c]	(GL30911-R1)	GL30911-R1	LYS1	Amino acid metabolism: Lysine Biosynthesis	1	-1000	1000	0		1.5.1.7
GL0335	Alpha-aminoadipic semialdehyde synthase (NAD+, L-lysine forming)	akg[m] + lys[m] + h[m] + nadh[m] -> sacp[m] + h2o[m] + nad[m]	(GL16639-R1)	GL16639-R1	AASS	Amino acid metabolism: Lysine Biosynthesis	0	0	1000	0		1.5.1.8
GL0336	Aromatic amino acid aminotransferase I	oap[c] + glu[c] <=> ama[c] + akg[c]	(GL24771-R1) or (GL31258-R1) or (GL20994-R1)	GL24771-R1 GL31258-R1 GL20994-R1	(ARO8.1 or ARO8.2 or ARO8.3)	Amino acid metabolism: Lysine Biosynthesis	1	-1000	1000	0		2.6.1.5
GL0337	2-Methylcitrate dehydratase, mitochondrial	hcit[m] <=> hacn[m] + h2o[m]	(GL29907-R1) or (GL25327-R1)	GL29907-R1 GL25327-R1	(ACON2 or PRPD)	Amino acid metabolism: Lysine Biosynthesis	1	-1000	1000	0		4.2.1.- 4.2.1.79
GL0338	Homoacontinate hydratase, mitochondrial	hacn[m] + h2o[m] <=> hicit[m]	(GL18527-R1)	GL18527-R1	LYS4	Amino acid metabolism: Lysine Biosynthesis	1	-1000	1000	0		4.2.1.36
GL0339	Aldehyde dehydrogenase	abutn[c] + nad[c] + h2o[c] -> gaba[c] + nadh[c] + 2 h[c]	(GL30174-R1) or (GL24130-R1)	GL30174-R1 GL24130-R1	(ALD1.1 or ALD1.2)	Amino acid metabolism: Arginine and proline metabolism	0	0	1000	0		1.2.1.3
GL0340	Aldehyde dehydrogenase	abutn[m] + nad[m] + h2o[m] -> gaba[m] + nadh[m] + 2 h[m]	(GL26572-R1) or (GL18415-R1) or (GL27033-R1)	GL26572-R1 GL18415-R1 GL27033-R1	(ALD1.3 or ALD1.4 or ALD1.5)	Amino acid metabolism: Arginine and proline metabolism	0	0	1000	0		1.2.1.3
GL0341	N-Acetyl-g-glutamyl-phosphate reductase, mitochondrial	naglup[m] + h[m] + nadph[m] -> naglus[m] + nadp[m] + pi[m]	(GL21258-R1)	GL21258-R1	ARG56	Amino acid metabolism: Arginine and proline metabolism	0	0	1000	0		1.2.1.38
GL0342	Gamma-glutamyl phosphate reductase	glup[c] + h[c] + nadph[c] -> glugsal[c] + nadp[c] + pi[c]	(GL21848-R1)	GL21848-R1	PROA	Amino acid metabolism: Arginine and proline metabolism	0	0	1000	0		1.2.1.41
GL0343	Gamma-glutamyl phosphate reductase	glup[c] + h[c] + nadh[c] -> glugsal[c] + nad[c] + pi[c]	(GL21848-R1)	GL21848-R1	PROA	Amino acid metabolism: Arginine and proline metabolism	0	0	1000	0		1.2.1.41
GL0344	Delta-1-pyrroline-5-carboxylate dehydrogenase	glugsal[c] + nad[c] + h2o[c] -> glu[c] + nadh[c] + 2 h[c]	(GL31395-R1)	GL31395-R1	PCD	Amino acid metabolism: Arginine and proline metabolism	0	0	1000	0		1.2.1.88
GL0345	Delta-1-pyrroline-5-carboxylate dehydrogenase	p5c[c] + nad[c] + 2 h2o[c] -> glu[c] + nadh[c] + h[c]	(GL31395-R1)	GL31395-R1	PCD	Amino acid metabolism: Arginine and proline metabolism	0	0	1000	0		1.2.1.88
GL0346	Delta-1-pyrroline-5-carboxylate dehydrogenase	p5c[c] + nadp[c] + 2 h2o[c] -> glu[c] + nadph[c] + h[c]	(GL31395-R1)	GL31395-R1	PCD	Amino acid metabolism: Arginine and proline metabolism	0	0	1000	0		1.2.1.88
GL0347	Proline dehydrogenase	pro[m] + fad[m] -> p5c[m] + fadh2[m] + h[m]	(GL29819-R1)	GL29819-R1	PRODH	Amino acid metabolism: Arginine and proline metabolism	0	0	1000	0		1.5.-.-
GL0348	Proline dehydrogenase	pro[c] + fad[c] -> p5c[c] + fadh2[c] + h[c]	(GL29632-R1)	GL29632-R1	PRODH	Amino acid metabolism: Arginine and proline metabolism	0	0	1000	0		1.5.-.-
GL0349	Pyrroline-5-carboxylate reductase	p5c[c] + 2 h[c] + nadph[c] -> pro[c] + nadp[c]	(GL28545-R1)	GL28545-R1	PROC	Amino acid metabolism: Arginine and proline metabolism	0	0	1000	0		1.5.1.2
GL0350	Pyrroline-5-carboxylate reductase	p5c[c] + 2 h[c] + nadh[c] -> pro[c] + nad[c]	(GL28545-R1)	GL28545-R1	PROC	Amino acid metabolism: Arginine and proline metabolism	0	0	1000	0		1.5.1.2
GL0351	Pyrroline-5-carboxylate reductase	phc[c] + nadh[c] + 2 h[c] -> hpro[c] + nad[c]	(GL28545-R1)	GL28545-R1	PROC	Amino acid metabolism: Arginine and proline metabolism	0	0	1000	0		1.5.1.2
GL0352	Pyrroline-5-carboxylate reductase	phc[c] + nadph[c] + 2 h[c] -> hpro[c] + nadp[c]	(GL28545-R1)	GL28545-R1	PROC	Amino acid metabolism: Arginine and proline metabolism	0	0	1000	0		1.5.1.2
GL0353	Polyamine oxidase	sprmd[c] + o2[c] + h2o[c] -> daprp[c] + abutn[c] + h2o2[c]	(GL22585-R1)	GL22585-R1	PAO1	Amino acid metabolism: Arginine and proline metabolism	0	0	1000	0		1.5.3.14
GL0354	Polyamine oxidase	sprm[c] + o2[c] + h2o[c] -> sprmd[c] + aproa[c] + h2o2[c]	(GL22585-R1)	GL22585-R1	PAO1	Amino acid metabolism: Arginine and proline metabolism	0	0	1000	0		1.5.3.16
GL0355	Ornithine carbamoyltransferase	cap[m] + orn[m] -> citr[m] + h[m] + pi[m]	(GL24986-R1)	GL24986-R1	OTC	Amino acid metabolism: Arginine and proline metabolism	0	0	1000	0		2.1.3.3
GL0356	N-Acteylglutamate synthase	glu[m] + accoa[m] -> naglu[m] + coa[m] + h[m]	(GL21955-R1) or (GL30332-R1)	GL21955-R1 GL30332-R1	(ARG7 or NAT)	Amino acid metabolism: Arginine and proline metabolism	0	0	1000	0		2.3.1.1
GL0357	Arginine biosynthesis bifunctional protein ARG7(Glutamate N-acetyltransferase / amino-acid N-acetyltransferase)	glu[m] + naorn[m] -> orn[m] + naglu[m]	(GL21955-R1)	GL21955-R1	ARG7	Amino acid metabolism: Arginine and proline metabolism	0	0	1000	0		2.3.1.35
GL0358	Spermidine synthase	dsam[c] + ptrsc[c] -> 5mta[c] + sprmd[c] + h[c]	(GL30835-R1)	GL30835-R1	SPEE	Amino acid metabolism: Arginine and proline metabolism	0	0	1000	0		2.5.1.16
GL0359	Spermine synthase	dsam[c] + sprmd[c] <=> 5mta[c] + sprm[c] + h[c]	(GL30835-R1)	GL30835-R1	SPEE	Amino acid metabolism: Arginine and proline metabolism	1	-1000	1000	0		2.5.1.16
GL0360	Acetylornithine aminotransferase	naglus[m] + glu[m] <=> naorn[m] + akg[m]	(GL26704-R1)	GL26704-R1	ARGD	Amino acid metabolism: Arginine and proline metabolism	1	-1000	1000	0		2.6.1.11
GL0361	Ornithine-oxo-acid aminotransferase	akg[c] + orn[c] <=> glu[c] + glugsal[c]	(GL15529-R1)	GL15529-R1	ROCD	Amino acid metabolism: Arginine and proline metabolism	1	-1000	1000	0		2.6.1.13
GL0362	Glutamate 5-kinase	glu[c] + atp[c] -> glup[c] + adp[c]	(GL22882-R1)	GL22882-R1	PROB	Amino acid metabolism: Arginine and proline metabolism	0	0	1000	0		2.7.2.11
GL0363	Acetylglutamate kinase, mitochondrial	naglu[m] + atp[m] -> naglup[m] + adp[m]	(GL21258-R1)	GL21258-R1	ARG56	Amino acid metabolism: Arginine and proline metabolism	0	0	1000	0		2.7.2.8
GL0364	Urease	urea[c] + h2o[c] + 2 h[c] -> co2[c] + 2 nh3[c]	(GL25823-R1) or (GL29836-R2) or (GL29836-R1)	GL25823-R1 GL29836-R2 GL29836-R1	(UREA1.1 or UREA1.2 or UREA1.3)	Amino acid metabolism: Arginine and proline metabolism	0	0	1000	0		3.5.1.5
GL0365	Allophanate hydrolase	ureac[c] + 3 h[c] + h2o[c] -> 2 co2[c] + 2 nh3[c]	(GL28626-R1)	GL28626-R1	DUR1	Amino acid metabolism: Arginine and proline metabolism	0	0	1000	0		3.5.1.54
GL0366	Arginase	arg[c] + h2o[c] -> orn[c] + urea[c]	(GL24613-R1)	GL24613-R1	ARG	Amino acid metabolism: Arginine and proline metabolism	0	0	1000	0		3.5.3.1
GL0367	Agmatinase	agm[c] + h2o[c] -> ptrsc[c] + urea[c]	(GL25071-R1) or (GL30578-R1)	GL25071-R1 GL30578-R1	(SPEB1.1 or SPEB1.2)	Amino acid metabolism: Arginine and proline metabolism	0	0	1000	0		3.5.3.11
GL0368	Ornithine decarboxylase	orn[c] + h[c] -> ptrsc[c] + co2[c]	(GL17083-R1)	GL17083-R1	ODC1	Amino acid metabolism: Arginine and proline metabolism	0	0	1000	0		4.1.1.17
GL0369	Adenosylmethionine decarboxylase	sam[c] + h[c] <=> dsam[c] + co2[c]	(GL17796-R1)	GL17796-R1	SPED	Amino acid metabolism: Arginine and proline metabolism	1	-1000	1000	0		4.1.1.50
GL0370	Ornithine cyclodeaminase	orn[m] -> pro[m] + nh3[m]	(GL19337-R1)	GL19337-R1	OCD	Amino acid metabolism: Arginine and proline metabolism	0	0	1000	0		4.3.1.12
GL0371	Urea carboxylase	urea[c] + atp[c] + hco3[c] <=> ureac[c] + adp[c] + h[c] + pi[c]	(GL28626-R1)	GL28626-R1	DUR1	Amino acid metabolism: Arginine and proline metabolism	1	-1000	1000	0		6.3.4.6
GL0372	spontaneous reaction	glugsal[c] <=> p5c[c] + h2o[c] + h[c]				Amino acid metabolism: Arginine and proline metabolism	1	-1000	1000	0
GL0373	spontaneous reaction	phc[c] + h2o[c] + h[c] <=> hgsal[c]				Amino acid metabolism: Arginine and proline metabolism	1	-1000	1000	0
GL0374	D-amino-acid oxidase	dpro[c] + o2[c] -> pyc[c] + h2o2[c] + h[c]	(GL24057-R1) or (GL30084-R1) or (GL30084-R2) or (GL30084-R3)	GL24057-R1 GL30084-R1 GL30084-R2 GL30084-R3	(DAO or OXDA1.1 or OXDA1.2 or OXDA1.3)	Amino acid metabolism: Arginine and proline metabolism	0	0	1000	0		1.4.3.3
GL0375	trans-L-3-hydroxyproline dehydratase	thpro[c] -> pyc[c] + h2o[c] + h[c]	(GL17612-R1)	GL17612-R1	L3 HYPDH	Amino acid metabolism: Arginine and proline metabolism	0	0	1000	0		4.2.1.77
GL0376	unclear reaction	dpro[c] + gln[c] -> lin[c] + 2 h[c]				Amino acid metabolism: Arginine and proline metabolism	0	0	1000	0
GL0377	Histidinol dehydrogenase	hisol[c] + 2 nad[c] + h2o[c] -> his[c] + 2 nadh[c] + 3 h[c]	(GL31286-R1)	GL31286-R1	HIS4	Amino acid metabolism: Histidine metabolism	0	0	1000	0		1.1.1.23
GL0378	histidyl-trna synthetase	atp[c] + his[c] + trnahis[c] -> amp[c] + histrna[c] + ppi[c]	(GL30373-R0)	GL30373-R0	HARS	Amino acid metabolism: Histidine metabolism	0	0	1000	0		6.1.1.21
GL0379	histidyl-trna synthetase, mitochondrial	atp[m] + his[m] + trnahis[m] -> amp[m] + histrna[m] + ppi[m]	(GL30373-R1)	GL30373-R1	HARS	Amino acid metabolism: Histidine metabolism	0	0	1000	0		6.1.1.21
GL0380	ATP phosphoribosyltransferase	prpp[c] + atp[c] <=> prbatp[c] + ppi[c]	(GL24642-R1)	GL24642-R1	HISG	Amino acid metabolism: Histidine metabolism	1	-1000	1000	0		2.4.2.17
GL0381	Histidinol-phosphate aminotransferase	glu[c] + imacp[c] <=> akg[c] + hisolp[c]	(GL17006-R1)	GL17006-R1	HISC	Amino acid metabolism: Histidine metabolism	1	-1000	1000	0		2.6.1.9
GL0382	Histidinol-phosphatase (PHP family)	hisolp[c] + h2o[c] -> hisol[c] + pi[c]	(GL21425-R1)	GL21425-R1	PHP	Amino acid metabolism: Histidine metabolism	0	0	1000	0		3.1.3.15
GL0383	Phosphoribosyl-AMP cyclohydrolase	prbamp[c] + h2o[c] -> prfp[c]	(GL31286-R1)	GL31286-R1	HIS4	Amino acid metabolism: Histidine metabolism	0	0	1000	0		3.5.4.19
GL0384	Phosphoribosyl-ATP pyrophosphatase	prbatp[c] + h2o[c] -> prbamp[c] + h[c] + ppi[c]	(GL31286-R1)	GL31286-R1	HIS4	Amino acid metabolism: Histidine metabolism	0	0	1000	0		3.6.1.31
GL0385	Aromatic-L-amino-acid decarboxylase	his[c] + h[c] -> hin[c] + co2[c]	(GL21006-R1)	GL21006-R1	DDC	Amino acid metabolism: Histidine metabolism	0	0	1000	0		4.1.1.28
GL0386	Cyclase/Glutamine amidotransferase	prlp[c] + gln[c] -> dimgp[c] + glu[c] + aicar[c] + h[c]	(GL30576-R1)	GL30576-R1	HISF/HISH	Amino acid metabolism: Histidine metabolism	0	0	1000	0		4.1.3.- 2.4.2.-
GL0387	Imidazoleglycerol-phosphate dehydratase	dimgp[c] -> h2o[c] + imacp[c]	(GL24572-R1)	GL24572-R1	HISB	Amino acid metabolism: Histidine metabolism	0	0	1000	0		4.2.1.19
GL0388	Phosphoribosylformimino-5-aminoimidazole carboxamide ribotide isomerase	prfp[c] -> prlp[c]	(GL31316-R1)	GL31316-R1	HISA	Amino acid metabolism: Histidine metabolism	0	0	1000	0		5.3.1.16
GL0389	histidase	his[c] <=> nh3[c] + urcan[c]				Amino acid metabolism: Histidine metabolism	1	-1000	1000	0		4.3.1.3
GL0390	urocanase	h2o[c] + urcan[c] -> 4izp[c]				Amino acid metabolism: Histidine metabolism	0	0	1000	0		4.2.1.49
GL0391	imidazolonepropionase	4izp[c] + h2o[c] -> forglu[c]				Amino acid metabolism: Histidine metabolism	0	0	1000	0		3.5.2.7
GL0392	formimidoylglutamase	forglu[c] + h2o[c] -> frmd[c] + glu[c]				Amino acid metabolism: Histidine metabolism	0	0	1000	0		3.5.3.8
GL0393	Homogentisate 1,2-dioxygenase	homogen[c] + o2[c] -> macac[c] + h[c]	(GL25922-R1)	GL25922-R1	HGD	Amino acid metabolism: Tyrosine metabolism	0	0	1000	0		1.13.11.5
GL0394	Tyrosinase	tyr[c] + o2[c] + 2 h[c] -> dopa[c] + h2o[c]	(GL24913-R1) or (GL25440-R1) or (GL28133-R1)	GL24913-R1 GL25440-R1 GL28133-R1	(TYR1.1 or TYR1.2 or TYR1.3)	Amino acid metabolism: Tyrosine metabolism	0	0	1000	0		1.14.18.1
GL0395	Aldehyde dehydrogenase Mitochondrial	dhpacl[m] + nadp[m] + h2o[m] <=> 34hpac[m] + nadph[m] + 2 h[m]	(GL23433-R1 and GL20614-R1) or (GL23433-R1 and GL20474-R1)	GL23433-R1 GL20614-R1 GL20474-R1	(AL3B1 and (AL3A1.1 or AL3A1.2))	Amino acid metabolism: Tyrosine metabolism	1	-1000	1000	0		1.2.1.5
GL0396	Primary-amine oxidase	dopn[c] + h2o[c] + o2[c] -> dhpacl[c] + nh3[c] + h2o2[c]	(GL22246-R1) or (GL27396-R1) or (GL22112-R1)	GL22246-R1 GL27396-R1 GL22112-R1	(AOC3.1 or AOC3.2 or AOC2)	Amino acid metabolism: Tyrosine metabolism	0	0	1000	0		1.4.3.21
GL0397	L-Tyrosine:2-oxoglutarate aminotransferase	tyr[m] + akg[m] <=> 4hpp[m] + glu[m]	(GL24851-R1) or (GL30239-R1)	GL24851-R1 GL30239-R1	(GOT1 or GOT2)	Amino acid metabolism: Tyrosine metabolism	1	-1000	1000	0		2.6.1.1
GL0398	L-Tyrosine:2-oxoglutarate aminotransferase	tyr[c] + akg[c] <=> 4hpp[c] + glu[c]	(GL24771-R1) or (GL31258-R1) or (GL20994-R1) or (GL17006-R1)	GL24771-R1 GL31258-R1 GL20994-R1 GL17006-R1	(ARO8.1 or ARO8.2 or ARO8.3 or HISC)	Amino acid metabolism: Tyrosine metabolism	1	-1000	1000	0		2.6.1.5 2.6.1.9
GL0399	Fumarylacetoacetate hydrolase	fuacac[c] + h2o[c] -> actac[c] + fum[c] + h[c]	(GL20661-R1)	GL20661-R1	FAA	Amino acid metabolism: Tyrosine metabolism	0	0	1000	0		3.7.1.2
GL0400	Aromatic-L-amino-acid decarboxylase	dopa[c] + h[c] -> dopn[c] + co2[c]	(GL21006-R1)	GL21006-R1	DDC	Amino acid metabolism: Tyrosine metabolism	0	0	1000	0		4.1.1.28
GL0401	Phenylpyruvate tautomerase	4hpp[c] <=> hhpp[c]	(GL19075-R1)	GL19075-R1	MIF	Amino acid metabolism: Tyrosine metabolism	1	-1000	1000	0		5.3.2.1
GL0402	Heme peroxidase	phe[c] + o2[c] -> pad[c] + co2[c] + h2o[c]	(GL30111-R1)	GL30111-R1	HP	Amino acid metabolism: Phenylalanine metabolism	0	0	1000	0		1.11.1.7
GL0403	4-Hydroxyphenylpyruvate:oxygen oxidoreductase	4hpp[c] + o2[c] -> homogen[c] + co2[c]	(GL22645-R1)	GL22645-R1	HPD	Amino acid metabolism: Phenylalanine metabolism	0	0	1000	0		1.13.11.27
GL0404	4-Hydroxyphenylpyruvate:oxygen oxidoreductase	phpyr[c] + o2[c] -> hphea[c] + co2[c]	(GL22645-R1)	GL22645-R1	HPD	Amino acid metabolism: Phenylalanine metabolism	0	0	1000	0		1.13.11.27
GL0405	Aldehyde dehydrogenase Mitochondrial	phal[m] + nad[m] + h2o[m] <=> pac[m] + nadh[m] + 2 h[m]	(GL23433-R1 and GL20614-R1) or (GL23433-R1 and GL20474-R1)	GL23433-R1 GL20614-R1 GL20474-R1	(AL3B1 and (AL3A1.1 or AL3A1.2))	Amino acid metabolism: Phenylalanine metabolism	1	-1000	1000	0		1.2.1.5
GL0406	Primary-amine oxidase	pnn[c] + h2o[c] + o2[c] <=> phal[c] + nh3[c] + h2o2[c]	(GL22246-R1) or (GL27396-R1) or (GL22112-R1)	GL22246-R1 GL27396-R1 GL22112-R1	(AOC3.1 or AOC3.2 or AOC2)	Amino acid metabolism: Phenylalanine metabolism	1	-1000	1000	0		1.4.3.21
GL0407	Histidinol-phosphate aminotransferase	phe[c] + akg[c] <=> phpyr[c] + glu[c]	(GL24771-R1) or (GL31258-R1) or (GL20994-R1) or (GL17006-R1)	GL24771-R1 GL31258-R1 GL20994-R1 GL17006-R1	(ARO8.1 or ARO8.2 or ARO8.3 or HISC)	Amino acid metabolism: Phenylalanine metabolism	1	-1000	1000	0		2.6.1.5 2.6.1.9
GL0408	Amidase	pad[c] + h2o[c] -> pac[c] + nh3[c]	(GL29633-R1) or (GL29700-R1) or (GL15699-R1) or (GL30541-R1) or (GL18499-R1) or (GL29483-R1)	GL29633-R1 GL29700-R1 GL15699-R1 GL30541-R1 GL18499-R1 GL29483-R1	(AMI1.1 or AMI1.2 or AMI1.3 or AMI1.4 or AMI1.5 or AMI1.6)	Amino acid metabolism: Phenylalanine metabolism	0	0	1000	0		3.5.1.4
GL0409	Aromatic-L-amino-acid decarboxylase	phe[c] + h[c] -> pnn[c] + co2[c]	(GL21006-R1)	GL21006-R1	DDC	Amino acid metabolism: Phenylalanine metabolism	0	0	1000	0		4.1.1.28
GL0410	Phenylalanine ammonia-lyase	phe[c] -> cin[c] + nh3[c]	(GL21231-R1) or (GL21534-R1)	GL21231-R1 GL21534-R1	(PAL1.1 or PAL1.2)	Amino acid metabolism: Phenylalanine metabolism	0	0	1000	0		4.3.1.24
GL0411	Phenylpyruvate tautomerase	phpyr[c] <=> hppp[c]	(GL19075-R1)	GL19075-R1	MIF	Amino acid metabolism: Phenylalanine metabolism	1	-1000	1000	0		5.3.2.1
GL0412	spontaneous reaction	hphea[c] + 0.5 o2 -> 26hpac[c]				Amino acid metabolism: Phenylalanine metabolism	0	0	1000	0
GL0413	Catalase	2 han[m] + 4 o2[m] -> cinn[m] + 2 o2.-[m] + 2 h2o2[m] + 2 h[m]	(GL26833-R1) or (GL22189-R1) or (GL29881-R1)	GL26833-R1 GL22189-R1 GL29881-R1	(CAT1.1 or CAT1.2 or CAT1.3)	Amino acid metabolism: Tryptophan metabolism	0	0	1000	0		1.11.1.6
GL0414	Indoleamine 2,3-dioxygenase	trp[c] + o2[c] -> fkyn[c]	(GL17042-R1) or (GL24710-R1)	GL17042-R1 GL24710-R1	(INDO1.1 or INDO1.2)	Amino acid metabolism: Tryptophan metabolism	0	0	1000	0		1.13.11.52
GL0415	Indoleamine 2,3-dioxygenase	l5htp[c] + o2[c] -> hfkyn[c]	(GL17042-R1) or (GL24710-R1)	GL17042-R1 GL24710-R1	(INDO1.1 or INDO1.2)	Amino acid metabolism: Tryptophan metabolism	0	0	1000	0		1.13.11.52
GL0416	Indoleamine 2,3-dioxygenase	set[c] + o2[c] -> fhkyn[c] + h[c]	(GL17042-R1) or (GL24710-R1)	GL17042-R1 GL24710-R1	(INDO1.1 or INDO1.2)	Amino acid metabolism: Tryptophan metabolism	0	0	1000	0		1.13.11.52
GL0417	3-Hydroxyanthranilate 3,4-dioxygenase	han[c] + o2[c] -> cmusa[c] + h[c]	(GL21166-R1)	GL21166-R1	HAAO	Amino acid metabolism: Tryptophan metabolism	0	0	1000	0		1.13.11.6
GL0418	Kynurenine 3-monooxygenase	kyn[c] + h[c] + nadph[c] + o2[c] -> hkyn[c] + h2o[c] + nadp[c]	(GL19819-R1)	GL19819-R1	KMO	Amino acid metabolism: Tryptophan metabolism	0	0	1000	0		1.14.13.9
GL0419	2-Oxoglutarate Dehydrogenase E1	oap[m] + coa[m] + nad[m] -> glucoa[m] + co2[m] + nadh[m]	(GL22262-R1)	GL22262-R1	OGDH	Amino acid metabolism: Tryptophan metabolism	0	0	1000	0		1.2.4.2
GL0420	Tryptophan aminotransferase	trp[c] + akg[c] -> indpyr[c] + glu[c]	(GL20270-R1) or (GL25884-R1) or (GL24771-R1) or (GL31258-R1) or (GL20994-R1)	(GL20270-R1 GL25884-R1) (GL24771-R1 GL31258-R1 GL20994-R1)	(TAM1.1 or TAM1.2 or ARO8.1 or ARO8.2 or ARO8.3)	Amino acid metabolism: Tryptophan metabolism	0	0	1000	0		2.6.1.27
GL0421	Kynurenine aminotransferase	kyn[c] + akg[c] -> apdob[c] + glu[c]	(GL22580-R1) or (GL31615-R1)	GL22580-R1 GL31615-R1	(BNA3.1 or BNA3.2)	Amino acid metabolism: Tryptophan metabolism	0	0	1000	0		2.6.1.7
GL0422	Kynurenine aminotransferase	hkyn[c] + akg[c] -> ahpdob[c] + glu[c]	(GL22580-R1) or (GL31615-R1)	GL22580-R1 GL31615-R1	(BNA3.1 or BNA3.2)	Amino acid metabolism: Tryptophan metabolism	0	0	1000	0		2.6.1.7
GL0423	Kynureninase	hkyn[c] + h2o[c] -> han[c] + ala[c] + h[c]	(GL28558-R1)	GL28558-R1	KYNU	Amino acid metabolism: Tryptophan metabolism	0	0	1000	0		3.7.1.3
GL0424	Kynureninase	fkyn[c] + h2o[c] -> fan[c] + ala[c] + h[c]	(GL28558-R1)	GL28558-R1	KYNU	Amino acid metabolism: Tryptophan metabolism	0	0	1000	0		3.7.1.3
GL0425	Arylformamidase	fan[c] + h2o[c] -> an[c] + for[c] + h[c]			AFMID	Amino acid metabolism: Tryptophan metabolism	0	0	1000	0		3.5.1.9
GL0426	Arylformamidase	fkyn[c] + h2o[c] -> for[c] + kyn[c] + h[c]			AFMID	Amino acid metabolism: Tryptophan metabolism	0	0	1000	0		3.5.1.9
GL0427	spontaneous reaction	cmusa[c] -> qa[c] + h2o[c]				Amino acid metabolism: Tryptophan metabolism	0	0	1000	0
GL0428	Shikimate dehydrogenase	dhsk[c] + h[c] + nadph[c] <=> sme[c] + nadp[c]	(GL21175-R1)	GL21175-R1	ARO1	Amino acid metabolism: Phenylalanine, tyrosine and tryptophan biosynthesis	1	-1000	1000	0		1.1.1.25
GL0429	Prephenate dehydrogenase (NADP+)	phen[c] + nadp[c] <=> 4hpp[c] + co2[c] + nadph[c]	(GL24493-R1)	GL24493-R1	TYR1	Amino acid metabolism: Phenylalanine, tyrosine and tryptophan biosynthesis	1	-1000	1000	0		1.3.1.13
GL0430	Anthranilate phosphoribosyltransferase	an[c] + prpp[c] <=> npran[c] + ppi[c]	(GL19278-R1)	GL19278-R1	TRPD	Amino acid metabolism: Phenylalanine, tyrosine and tryptophan biosynthesis	1	-1000	1000	0		2.4.2.18
GL0431	3-Phosphoshikimate 1-carboxyvinyltransferase	pep[c] + sme5p[c] -> 3psme[c] + pi[c]	(GL21175-R1)	GL21175-R1	ARO1	Amino acid metabolism: Phenylalanine, tyrosine and tryptophan biosynthesis	0	0	1000	0		2.5.1.19
GL0432	3-Deoxy-7-phosphoheptulonate synthase	e4p[c] + pep[c] + h2o[c] -> 3ddah7p[c] + pi[c]	(GL23742-R1) or (GL25047-R1) or (GL21361-R1)	GL23742-R1 GL25047-R1 GL21361-R1	(AROH1.1 or AROH1.2 or AROH1.3)	Amino acid metabolism: Phenylalanine, tyrosine and tryptophan biosynthesis	0	0	1000	0		2.5.1.54
GL0433	Chorismate pyruvatemutase	chor <=> phen[c]	(GL16921-R1)	GL16921-R1	CPM	Amino acid metabolism: Phenylalanine, tyrosine and tryptophan biosynthesis	1	-1000	1000	0		5.4.99.5
GL0434	Shikimate kinase	sme[c] + atp[c] -> sme5p[c] + adp[c] + h[c]	(GL21175-R1)	GL21175-R1	ARO1	Amino acid metabolism: Phenylalanine, tyrosine and tryptophan biosynthesis	0	0	1000	0		2.7.1.71
GL0435	Aromatic-L-amino-acid decarboxylase	trp[c] + h[c] -> trn[c] + co2[c]	(GL21006-R1)	GL21006-R1	DDC	Amino acid metabolism: Phenylalanine, tyrosine and tryptophan biosynthesis	0	0	1000	0		4.1.1.28
GL0436	Aromatic-L-amino-acid decarboxylase	l5htp[c] + h[c] -> set[c] + co2[c]	(GL21006-R1)	GL21006-R1	DDC	Amino acid metabolism: Phenylalanine, tyrosine and tryptophan biosynthesis	0	0	1000	0		4.1.1.28
GL0437	Indole-3-glycerol phosphate synthase	cpad5p[c] + h[c] <=> igp[c] + co2[c] + h2o[c]	(GL20235-R1) or (GL25289-R1)	GL20235-R1 GL25289-R1	(TRPC or TRP1)	Amino acid metabolism: Phenylalanine, tyrosine and tryptophan biosynthesis	1	-1000	1000	0		4.1.1.48
GL0438	Anthranilate synthase	chor[c] + gln[c] <=> an[c] + glu[c] + pyr[c] + h[c]	(GL20235-R1) or (GL25289-R1)	GL20235-R1 GL25289-R1	(TRPC or TRP1)	Amino acid metabolism: Phenylalanine, tyrosine and tryptophan biosynthesis	1	-1000	1000	0		4.1.3.27
GL0439	3-Dehydroquinate dehydratase	dqt[c] <=> dhsk[c] + h2o[c]	(GL21175-R1)	GL21175-R1	ARO1	Amino acid metabolism: Phenylalanine, tyrosine and tryptophan biosynthesis	1	-1000	1000	0		4.2.1.10
GL0440	Prephenate dehydratase	phen[c] + h[c] <=> phpyr[c] + co2[c] + h2o[c]	(GL30664-R1)	GL30664-R1	PHEA2	Amino acid metabolism: Phenylalanine, tyrosine and tryptophan biosynthesis	1	-1000	1000	0		4.2.1.51
GL0441	3-Dehydroquinate synthase	3ddah7p[c] -> dqt[c] + pi[c]	(GL21175-R1)	GL21175-R1	ARO1	Amino acid metabolism: Phenylalanine, tyrosine and tryptophan biosynthesis	0	0	1000	0		4.2.3.4
GL0442	Chorismate synthase	3psme[c] -> chor[c] + pi[c]	(GL30403-R1)	GL30403-R1	AROC	Amino acid metabolism: Phenylalanine, tyrosine and tryptophan biosynthesis	0	0	1000	0		4.2.3.5
GL0443	Phosphoribosylanthranilate isomerase	npran[c] <=> cpad5p[c]	(GL20235-R1) or (GL25289-R1)	GL20235-R1 GL25289-R1	(TRPC or TRP1)	Amino acid metabolism: Phenylalanine, tyrosine and tryptophan biosynthesis	1	-1000	1000	0		5.3.1.24
GL0444	Picolinic acid decarboxylase	cmusa[c] + 2 h[c] -> am6sa[c] + co2[c]				Amino acid metabolism: Phenylalanine, tyrosine and tryptophan biosynthesis	0	0	1000	0		4.1.1.45
GL0445	Maleylacetoacetate isomerase	macac[c] -> fuacac[c]				Amino acid metabolism: Phenylalanine, tyrosine and tryptophan biosynthesis	0	0	1000	0		5.2.1.2
GL0446	Spermidine acetyltransferase	accoa[c] + sprmd[c] -> nsprd[c] + coa[c] + h[c]	(GL20695-R1)	GL20695-R1	SAT2	Amino acid metabolism: Phenylalanine, tyrosine and tryptophan biosynthesis	0	0	1000	0		2.3.1.57
GL0447	3-Hydroxypropionate dehydrogenase	hpp[m] + nad[m] <=> opp[m] + nadh[m] + h[m]				Amino acid metabolism: beta-Alanine metabolism	1	-1000	1000	0		1.1.1.59
GL0448	Malonate-semialdehyde dehydrogenase	opp[m] + coa[m] + nad[m] -> accoa[m] + co2[m] + nadh[m]	(GL30044-R1)	GL30044-R1	MMSA	Amino acid metabolism: beta-Alanine metabolism	0	0	1000	0		1.2.1.18
GL0449	Malonate-semialdehyde dehydrogenase	opp[m] + coa[m] + nadp[m] -> accoa[m] + co2[m] + nadph[m]	(GL30044-R1)	GL30044-R1	MMSA	Amino acid metabolism: beta-Alanine metabolism	0	0	1000	0		1.2.1.18
GL0450	Aldehyde dehydrogenase	aproa[c] + nad[c] + h2o[c] -> bala[c] + nadh[c] + 2 h[c]	(GL30174-R1) or (GL24130-R1)	GL30174-R1 GL24130-R1	(ALD1.1 or ALD1.2)	Amino acid metabolism: beta-Alanine metabolism	0	0	1000	0		1.2.1.3
GL0451	Aldehyde dehydrogenase	aproa[m] + nad[m] + h2o[m] -> bala[m] + nadh[m] + 2 h[m]	(GL23433-R1 and GL20614-R1) or (GL23433-R1 and GL20474-R1) or (GL26572-R1) or (GL26572-R1) or (GL18415-R1) or (GL27033-R1)	GL26572-R1 GL26572-R1 GL18415-R1 GL27033-R1 GL23433-R1 GL20614-R1 GL20474-R1	(ALD1.3 or ALD1.4 or ALD1.5 or ALD1.6 or （AL3B1 and (AL3A1.1 or AL3A1.2))	Amino acid metabolism: beta-Alanine metabolism	0	0	1000	0		1.2.1.3 1.2.1.5
GL0452	Acyl-CoA dehydrogenase	ppcoa[m] + fad[m] <=> ppecoa[m] + fadh2[m]	(GL26706-R1)	GL26706-R1	ACADM	Amino acid metabolism: beta-Alanine metabolism	1	-1000	1000	0		1.3.8.7
GL0453	Primary-amine oxidase	daprp[c] + h2o[c] + o2[c] -> aproa[c] + nh3[c] + h2o2[c]	(GL22246-R1) or (GL27396-R1) or (GL22112-R1)	GL22246-R1 GL27396-R1 GL22112-R1	(AOC3.1 or AOC3.2 or AOC2)	Amino acid metabolism: beta-Alanine metabolism	0	0	1000	0		1.4.3.21
GL0454	3-Hydroxyisobutyryl-CoA hydrolase	hcoa[m] + h2o[m] -> hpp[m] + coa[m] + h[m]	(GL24616-R1)	GL24616-R1	HIBCH	Amino acid metabolism: beta-Alanine metabolism	0	0	1000	0		3.1.2.4
GL0455	3-Hydroxypropionyl-CoA hydro-lyase	hcoa[m] <=> ppecoa[m] + h2o[m]	(GL27016-R1)	GL27016-R1	ECHS1	Amino acid metabolism: beta-Alanine metabolism	1	-1000	1000	0		4.2.1.17
GL0456	cystathionine gamma-lyase	semet[m] + h2o[m] -> msel[m] + nh3[m] + obut[m]	(GL22139-R1)	GL22139-R1	CTH	Amino acid metabolism: Selenocompound metabolism	0	0	1000	0		4.4.1.1
GL0457	cystathionine gamma-lyase	semsc[m] + h2o[m] -> pyr[m] + nh3[m] + msel[m]	(GL22139-R1)	GL22139-R1	CTH	Amino acid metabolism: Selenocompound metabolism	0	0	1000	0		4.4.1.1
GL0458	thioredoxin reductase (NADPH)	selt[c] + 3 nadph[c] + 4 h[c] -> seld[c] + 3 nadp[c] + 3 h2o[c]	(GL24381-R1)	GL24381-R1	trxB	Amino acid metabolism: Selenocompound metabolism	0	0	1000	0		1.8.1.9
GL0459	thioredoxin reductase (NADPH)	2 nadph[c] + 3 h[c] + msea[c] -> 2 nadp[c] + 2 h2o[c] + msel[c]	(GL24381-R1)	GL24381-R1	trxB	Amino acid metabolism: Selenocompound metabolism	0	0	1000	0		1.8.1.9
GL0460	sulfate adenylyltransferase	atp[c] + selnt[c] + 2 h[c] -> ppi[c] + aselnt[c]	(GL25330-R1)	GL25330-R1	sat	Amino acid metabolism: Selenocompound metabolism	0	0	1000	0		2.7.7.4
GL0461	spontaneous reaction	2 fero[c] + aselnt[c] -> 2 feri[c] + selt[c] + amp[c] + h[c]				Amino acid metabolism: Selenocompound metabolism	0	0	1000	0
GL0462	spontaneous reaction	selt[c] + 4 gsh[c] + 2 h[c] -> gssesg[c] + ogt[c] + 3 h2o[c]				Amino acid metabolism: Selenocompound metabolism	0	0	1000	0
GL0463	spontaneous reaction	gssesg[c] + gsh[c] -> gsseh[c] + ogt[c]				Amino acid metabolism: Selenocompound metabolism	0	0	1000	0
GL0464	spontaneous reaction	seld[c] -> mnag[c]				Amino acid metabolism: Selenocompound metabolism	0	0	1000	0
GL0465	spontaneous reaction	gsseh[c] -> seld[c]				Amino acid metabolism: Selenocompound metabolism	0	0	1000	0
GL0466	methionyl-tRNA synthetase	atp[m] + semet[m] + mtrna[m] -> amp[m] + ppi[m] + selemettrna[m]	(GL31652-R1) or (GL26011-R1)	GL31652-R1 GL26011-R1	MARS	Amino acid metabolism: Selenocompound metabolism	0	0	1000	0		6.1.1.10
GL0467	5-methyltetrahydropteroyltriglutamate--homocysteine methyltransferase	shsys[c] + mthptglu[c] -> semet[c] + thptglu[c] + 3 h[c]	(GL19459-R1) or (GL31662-R1)	GL19459-R1 GL31662-R1	(METE1.1 or METE1.2)	Amino acid metabolism: Selenocompound metabolism	0	0	1000	0		2.1.1.14
GL0468	cystathionine beta-lyase	scyst[c] + h2o[c] -> shsys[c] + nh3[c] + pyr[c] + h[c]	(GL17879-R1)	GL17879-R1	CBL	Amino acid metabolism: Selenocompound metabolism	0	0	1000	0		4.4.1.8
GL0469	cystathionine gamma-synthase	ophser[c] + scys[c] -> scyst[c] + pi[c]	(GL27621-R1)	GL27621-R1	CGS	Amino acid metabolism: Selenocompound metabolism	0	0	1000	0		2.5.1.48
GL0470	D-amino-acid oxidase	dorn[c] + h2o[c] + o2[c] -> 5a2opa[c] + nh3[c] + h2o2[c]	(GL24057-R1) or (GL30084-R1) or (GL30084-R2) or (GL30084-R3)	GL24057-R1 GL30084-R1 GL30084-R2 GL30084-R3	(DAO or OXDA1.1 or OXDA1.2 or OXDA1.3)	Amino acid metabolism: D-Arginine and D-ornithine metabolism	0	0	1000	0		1.4.3.3
GL0471	D-amino-acid oxidase	darg[c] + h2o[c] + o2[c] -> 5g2ot[c] + nh3[c] + h2o2[c]	(GL24057-R1) or (GL30084-R1) or (GL30084-R2) or (GL30084-R3)	GL24057-R1 GL30084-R1 GL30084-R2 GL30084-R3	(DAO or OXDA1.1 or OXDA1.2 or OXDA1.3)	Amino acid metabolism: D-Arginine and D-ornithine metabolism	0	0	1000	0		1.4.3.3
GL0472	spontaneous reaction	pyc[c] + h2o[c] + h[c] -> 5a2opa[c]				Amino acid metabolism: D-Arginine and D-ornithine metabolism	0	0	1000	0
GL0473	unclear reaction	5g2ot[c] + h2o[c] -> 5a2opa[c] + urea[c]				Amino acid metabolism: D-Arginine and D-ornithine metabolism	0	0	1000	0
GL0474	5-oxoprolinase (ATP-hydrolysing)	atp[c] + 2 h2o[c] + 5opro[c] -> adp[c] + pi[c] + glu[c] + h[c]	(GL19205-R1) or (GL18875-R1)	GL19205-R1 GL18875-R1	OPLAH	Amino acid metabolism: Glutathione metabolism	0	0	1000	0		3.5.2.9
GL0475	Glutamate-cysteine ligase	atp[c] + glu[c] + cys[c] -> adp[c] + pi[c] + gc[c] + h[c]	(GL25146-R1)	GL25146-R1	GCLC	Amino acid metabolism: Glutathione metabolism	0	0	1000	0		6.3.2.2
GL0476	Glutathione synthase	gly[c] + atp[c] + gc[c] -> h[c] + pi[c] + adp[c] + gsh[c]	(GL19810-R1)	GL19810-R1	GSS	Amino acid metabolism: Glutathione metabolism	0	0	1000	0		6.3.2.3
GL0477	glutathione transferase	gsh[e] + rx[e] -> hx[e] + rglutt[e] + h[e]	(GL25117-R1) or (GL25817-R1) or (GL16739-R1) or (GL28124-R1) or (GL26599-R1) or (GL30079-R1) or (GL16746-R1) or (GL16156-R1) or (GL25873-R1) or (GL16582-R1) or (GL25575-R1) or (GL16738-R1) or (GL24307-R1) or (GL27245-R1) or (GL25112-R1) or (GL18625-R1) or (GL23543-R1) or (GL23507-R1)	GL25117-R1 GL25817-R1 GL16739-R1 GL28124-R1 GL26599-R1 GL30079-R1 GL16746-R1 GL16156-R1 GL25873-R1 GL16582-R1 GL25575-R1 GL16738-R1 GL24307-R1 GL27245-R1 GL25112-R1 GL18625-R1 GL23543-R1 GL23507-R1	GST	Amino acid metabolism: Glutathione metabolism	0	0	1000	0		2.5.1.18
GL0478	glutathione transferase	gsh[m] + rx[m] -> hx[m] + rglutt[m] + h[m]	(GL25117-R1) or (GL25817-R1) or (GL16739-R1) or (GL28124-R1) or (GL26599-R1) or (GL30079-R1) or (GL16746-R1) or (GL16156-R1) or (GL25873-R1) or (GL16582-R1) or (GL25575-R1) or (GL16738-R1) or (GL24307-R1) or (GL27245-R1) or (GL25112-R1) or (GL18625-R1) or (GL23543-R1) or (GL23507-R1)	GL25117-R1 GL25817-R1 GL16739-R1 GL28124-R1 GL26599-R1 GL30079-R1 GL16746-R1 GL16156-R1 GL25873-R1 GL16582-R1 GL25575-R1 GL16738-R1 GL24307-R1 GL27245-R1 GL25112-R1 GL18625-R1 GL23543-R1 GL23507-R1	GST	Amino acid metabolism: Glutathione metabolism	0	0	1000	0		2.5.1.18
GL0479	glutathione transferase	gsh[c] + rx[c] -> hx[c] + rglutt[c] + h[c]	(GL25117-R1) or (GL25817-R1) or (GL16739-R1) or (GL28124-R1) or (GL26599-R1) or (GL30079-R1) or (GL16746-R1) or (GL16156-R1) or (GL25873-R1) or (GL16582-R1) or (GL25575-R1) or (GL16738-R1) or (GL24307-R1) or (GL27245-R1) or (GL25112-R1) or (GL18625-R1) or (GL23543-R1) or (GL23507-R1)	GL25117-R1 GL25817-R1 GL16739-R1 GL28124-R1 GL26599-R1 GL30079-R1 GL16746-R1 GL16156-R1 GL25873-R1 GL16582-R1 GL25575-R1 GL16738-R1 GL24307-R1 GL27245-R1 GL25112-R1 GL18625-R1 GL23543-R1 GL23507-R1	GST	Amino acid metabolism: Glutathione metabolism	0	0	1000	0		2.5.1.18
GL0480	glutathione-disulfide reductase	3 h[c] + nadph[c] + gssg[c] -> nadp[c] + 2 gsh[c]	(GL22863-R1)	GL22863-R1	GSR	Amino acid metabolism: Glutathione metabolism	0	0	1000	0		1.8.1.7
GL0481	glutathione peroxidase	h2o2[m] + 2 gsh[m] -> 2 h2o[m] + gssg[m] + 2 h[m]	(GL25996-R1)	GL25996-R1	GSP	Amino acid metabolism: Glutathione metabolism	0	0	1000	0		1.11.1.9
GL0482	glutathione oxidase	o2[c] + 2 cys[c] -> h2o2[c] + cyst[c]				Amino acid metabolism: Glutathione metabolism	0	0	1000	0		1.8.3.3
GL0483	gamma-glutamyltranspeptidase	gsh[m] + h2o[m] <=> cgly[m] + glu[m]	(GL30295-R1)	GL30295-R1	ggt	Amino acid metabolism: Glutathione metabolism	1	-1000	1000	0		2.3.2.2
GL0484	gamma-glutamyltranspeptidase	rglutt[m] + h2o[m] -> rscg[m] + glu[m]	(GL30295-R1)	GL30295-R1	ggt	Amino acid metabolism: Glutathione metabolism	0	0	1000	0		2.3.2.2
GL0485	glutathione gamma-glutamylaminopeptidase	gsh[c] + h2o[c] -> cgly[c] + glu[c]	(GL25353-R1) or (GL30295-R1)	GL25353-R1 GL30295-R1	GGT1_5 ggt	Amino acid metabolism: Glutathione metabolism	0	0	1000	0		3.4.19.13
GL0486	cytosol aminopeptidase	rscg[c] + h2o[c] -> rcys[c] + gly[c]	(GL29833-R1) or (GL20925-R1) or (GL15303-R1)	GL29833-R1 GL20925-R1 GL15303-R1	(LAP3 or DUG1)	Amino acid metabolism: Glutathione metabolism	0	0	1000	0		3.4.11.1 3.4.13.-
GL0487	Cys-Gly metallodipeptidase DUG1	cgly[c] + h2o[c] -> cys[c] + gly[c]	(GL20925-R1) or (GL15303-R1) or (GL29833-R1)	GL20925-R1 GL15303-R1 GL29833-R1	(DUG1 or LAP3)	Amino acid metabolism: Glutathione metabolism	0	0	1000	0		3.4.11.1 3.4.13.-
GL0488	Cytochrome c reductase (Complex III; also known as the cytochrome b-c1 complex)	2 feri[m] + qh2[m] -> 2 fero[m] + q[m] + 2 h[m]	(GL30453-R1 and GL21922-R1 and GL16501-R1 and GL23148-R1 and GL21066-R1 and GL26604-R1)	GL30453-R1 GL21922-R1 GL16501-R1 GL23148-R1 GL21066-R1 GL26604-R1	(ISP and CYT1 and QCR2 and QCR6 and QCR8 and QCR9)	Energy metabolism: Oxidative Phosphorylation	0	0	1000	0		1.10.2.2
GL0489	Alternative oxidase	qh2[m] + 0.5 o2[m] -> q[m] + h2o[m]	(GL23962-R1)	GL23962-R1	AOX	Energy metabolism: Oxidative Phosphorylation	0	0	1000	0		1.10.3.11
GL0490	Cytochrome c peroxidase, mitochondrial	2 fero[m] + h2o2[m] + 2 h[m] -> 2 feri[m] + 2 h2o[m]	(GL23456-R1)	GL23456-R1	CCP	Energy metabolism: Oxidative Phosphorylation	0	0	1000	0		1.11.1.5
GL0491	Formate dehydrogenase, cytosolic/mitochondrial	for[c] + h[c] + q[m] -> co2[c] + qh2[m]				Energy metabolism: Oxidative Phosphorylation	0	0	1000	0		1.2.2.1
GL0492	Fumarate reductase	fum[c] + fadh2[m] -> succ[c] + fad[m]	(GL25066-R1)	GL25066-R1	OSM1	Energy metabolism: Oxidative Phosphorylation	0	0	1000	0		1.3.5.4
GL0493	NADPH-ferrihemoprotein reductase	2 feri[c] + nadph[c] -> 2 fero[c] + nadp[c] + h[c]	(GL19526-R1) or (GL20687-R1) or (GL24199-R1) or (GL17184-R1) or (GL19267-R1)	GL19526-R1 GL20687-R1 GL24199-R1 GL17184-R1 GL19267-R1	(NCPR or C505.1 or C505.2 or C505.3 or C505.4)	Energy metabolism: Oxidative Phosphorylation	0	0	1000	0		1.6.2.4
GL0494	NADPH Quinone reductase	nadph[m] + h[m] + q[m] -> qh2[m] + nadp[m]	(GL25695-R1)	GL25695-R1	QOR	Energy metabolism: Oxidative Phosphorylation	0	0	1000	0		1.6.5.5
GL0495	NADPH dehydrogenase	nadph[c] + h[c] + q[m] -> nadp[c] + qh2[m]	(GL27193-R1) or (GL15802-R1) or (GL23447-R1) or (GL30602-R1) or (GL18562-R1) or (GL23886-R1)	GL27193-R1 GL15802-R1 GL23447-R1 GL30602-R1 GL18562-R1 GL23886-R1	(OYE or OYE1 or OYEB.1 or NAMA or OYEB.2 or OYEC)	Energy metabolism: Oxidative Phosphorylation	0	0	1000	0		1.6.99.1
GL0496	NADH dehydrogenase (Complex I)	nadh[m] + 5 h[m] + q[m] -> nad[m] + qh2[m] + 4 h[c]	(GL21014-R1 and GL30051-R1 and GL29889-R2 and GL16847-R1 and GL22430-R1 and GL22430-R2 and GL30555-R1 and GL17543-R1 and GL31498-R1 and GL16611-R1 and GL15140-R1) or (GL21120-R1 and GL26570-R1 and GL29945-R1 and GL18577-R1 and GL31192-R1 and GL23611-R1 and GL30670-R1 and GL29712-R1 and GL31637-R1) or (GL28745-R1 and GL25988-R1 and GL31505-R1)	GL21014-R1 GL30051-R1 GL29889-R2 GL16847-R1 GL22430-R1 GL22430-R2 GL30555-R1 GL17543-R1 GL31498-R1 GL16611-R1 GL15140-R1 GL21120-R1 GL26570-R1 GL29945-R1 GL18577-R1 GL31192-R1 GL23611-R1 GL30670-R1 GL29712-R1 GL31637-R1 GL28745-R1 GL25988-R1 GL31505-R1	((NDUFS1 and NDUFS2 and NDUFS3 and NDUFS4 and NDUFS5.1 and NDUFS5.2 and NDUFS6 and NDUFS7 and NDUFS8 and NDUFV1 and NDUFV2) or (NDUFA2 and NDUFA4 and NDUFA5 and NDUFA6 and NDUFA8 and NDUFA9 and BDUFAB1 and NDUFA11 and NDUFA13) or (NDUFB3 and NDUFB8 and NDUFB9))	Energy metabolism: Oxidative Phosphorylation	0	0	1000	0		1.6.99.3 1.6.5.3
GL0497	Cytochrome c oxidase (Complex IV)	4 fero[c] + 8 h[m] + o2[m] -> 4 feri[c] + 4 h[c] + 2 h2o[m]	(GL29011-R1) or (GL24640-R1 and GL29524-R1 and GL26015-R1 and GL17918-R1 and GL27344-R1 and GL31242-R1 and GL26658-R1 and GL26113-R1 and GL26573-R1 and GL31242-R1 and GL22841-R1)	GL29011-R1 GL24640-R1 GL29524-R1 GL26015-R1 GL17918-R1 GL27344-R1 GL31242-R1 GL26658-R1 GL26113-R1 GL26573-R1 GL22841-R1	(COX10 or (COX4 and COX5A and COX5B and COX6B and COX7A1 and COX7A2 and COX7C and COX11 and COX15 and COX17))	Energy metabolism: Oxidative Phosphorylation	0	0	1000	0		1.9.3.1
GL0498	Inorganic diphosphatase	h2o[c] + ppi[c] -> h[c] + 2 pi[c]	(GL30348-R1)	GL30348-R1	IPP1	Energy metabolism: Oxidative Phosphorylation	0	0	1000	0		3.6.1.1
GL0499	Inorganic diphosphatase, mitochondrial	h2o[m] + ppi[m] -> h[m] + 2 pi[m]	(GL30348-R1)	GL30348-R1	PPA	Energy metabolism: Oxidative Phosphorylation	0	0	1000	0		3.6.1.1
GL0500	Trimetaphosphate hydrolase	tmp[c] + h2o[c] <=> pppi[c] + h[c]				Energy metabolism: Oxidative Phosphorylation	1	-1000	1000	0		3.6.1.2
GL0501	Na+/K+-exchanging ATPase	k[e] + na[c] + atp[c] + h2o[c] -> k[c] + na[e] + adp[c] + pi[c] + h[c]	(GL30508-R1 and GL25555-R1 and GL22885-R1)	GL30508-R1 GL25555-R1 GL22885-R1	(ATP1A1 and ATP1A2 and AT1A4)	Energy metabolism: Oxidative Phosphorylation	0	0	1000	0		3.6.3.10
GL0502	ATP synthase(V-type)	4 h[c] + adp[m] + pi[m] <=> 3 h[m] + atp[m] + h2o[m]	(GL23954-R1 and GL29904-R1 and GL17240-R1 and GL18879-R1 and GL30203-R1 and GL21707-R1 and GL22792-R1 and GL22792-R2 and GL17179-R1 and GL23743-R1 and GL23743-R2 and GL25218-R1 and GL23948-R1) or (GL18722-R1 and GL24652-R1 and GL15031-R1 and GL25272-R1 and GL24639-R1 and GL27822-R1 and GL22966-R1 and GL26651-R1 and GL30055-R1 and GL24128-R1 and GL24317-R1 and GL16114-R1 and GL19790-R1)	GL23954-R1 GL29904-R1 GL17240-R1 GL18879-R1 GL30203-R1 GL21707-R1 GL22792-R1 GL22792-R2 GL17179-R1 GL23743-R1 GL23743-R2 GL25218-R1 GL23948-R1 GL18722-R1 GL24652-R1 GL15031-R1 GL25272-R1 GL24639-R1 GL27822-R1 GL22966-R1 GL26651-R1 GL30055-R1 GL24128-R1 GL24317-R1 GL16114-R1 GL19790-R1	(ATP6B and ATP6C and ATP6M and ATP6E and ATP6S14 and ATP6G and ATP6N1 and ATP6N2 and ATP6L1 and ATP6L2 and ATP6L3 and ATP6L4 and ATP6D) or (ATP5A1 and ATP5B and ATP5C1 and ATP5D and ATP5E and ATP5O and ATP5F1 and ATP5 h and ATP21 and ATP17 and ATP5L and ATP14 and ATP18)	Energy metabolism: Oxidative Phosphorylation	1	-1000	1000	0		3.6.3.14
GL0503	ATPase, cytosolic	h[c] + atp[c] + h2o[c] -> 2 h[e] + adp[c] + pi[c]	(GL22533-R1)	GL22533-R1	PMA1	Energy metabolism: Oxidative Phosphorylation	0	0	1000	0		3.6.3.6
GL0504	Na+/K+-exchanging ATPase	h[c] + k[e] + atp[c] + h2o[c] -> 2 h[e] + k[c] + adp[c] + pi[c]	(GL30508-R1 and GL25555-R1 and GL22885-R1)	GL30508-R1 GL25555-R1 GL22885-R1	(ATP1A1 and ATP1A2 and AT1A4)	Energy metabolism: Oxidative Phosphorylation	0	0	1000	0		3.6.3.9
GL0505	Adenylate kinase (Inorganic triphosphate)	amp[c] + pppi[c] <=> adp[c] + ppi[c]				Energy metabolism: Oxidative Phosphorylation	1	-1000	1000	0
GL0506	Succinate reductase	fum[c] + fadh2[c] -> succ[c] + fad[c]	(GL15437-R1 and GL15912-R1 and GL22227-R1 and GL24204-R1 and GL20821-R1)	GL15437-R1 GL15912-R1 GL22227-R1 GL24204-R1 GL20821-R1	(SDHC.1 and SDHB and SDHD and SDHC.2 and SDHA)	Energy metabolism: Oxidative Phosphorylation	0	0	1000	0		1.3.99.1	bp with LC915
GL0507	alcohol oxidase	meoh[c] + o2[c] -> fald[c] + h2o2[c]	(GL17761-R1) or (GL18144-R1) or (GL21354-R1)	GL17761-R1 GL18144-R1 GL21354-R1	MOX	Energy metabolism: Methane metabolism	0	0	1000	0		1.1.3.13
GL0508	S-(hydroxymethyl)glutathione dehydrogenase	hygta[c] + nad[c] -> fgt[c] + nadh[c] + h[c]	(GL29181-R1)	GL29181-R1	ADH5	Energy metabolism: Methane metabolism	0	0	1000	0		1.1.1.284
GL0509	S-(hydroxymethyl)glutathione dehydrogenase	hygta[c] + nadp[c] -> fgt[c] + nadph[c] + h[c]	(GL29181-R1)	GL29181-R1	ADH5	Energy metabolism: Methane metabolism	0	0	1000	0		1.1.1.284
GL0510	Glycine hydroxymethyltransferase	nnme[c] + gly[c] + h2o[c] -> ser[c] + thmpt[c]	(GL28298-R1)	GL28298-R1	GLYA	Energy metabolism: Methane metabolism	0	0	1000	0		2.1.2.1
GL0511	Dihydroxyacetone kinase	atp[c] + glyn[c] -> adp[c] + t3p2[c] + h[c]	(GL15754-R1)	GL15754-R1	DAK1	Energy metabolism: Methane metabolism	0	0	1000	0		2.7.1.29
GL0512	Nitrate reductase	hno3[c] + nadh[c] + h[c] -> hno2[c] + nad[c] + h2o[c]	(GL22281-R1)	GL22281-R1	NR	Energy metabolism: Nitrogen metabolism	0	0	1000	0		1.7.1.2
GL0513	Nitrate reductase	hno3[c] + nadph + h[c] -> hno2[c] + nadp[c] + h2o	(GL22281-R1)	GL22281-R1	NR	Energy metabolism: Nitrogen metabolism	0	0	1000	0		1.7.1.2
GL0514	Nitrite reductase	hno2[c] + 3 nadh[c] + 5 h[c] -> nh4oh[c] + 3 nad[c] + h2o[c]	(GL29837-R1)	GL29837-R1	NIT6	Energy metabolism: Nitrogen metabolism	0	0	1000	0		1.7.1.4
GL0515	spontaneous conversion	nh4oh[c] <=> h2o[c] + nh3[c]				Energy Metabolism: Nitrogen metabolism	1	-1000	1000	0
GL0516	Nitrite reductase	hno2[c] + 3 nadph[c] + 5 h[c] -> nh3[c] + 3 nadp[c] + 2 h2o[c]	(GL29837-R1)	GL29837-R1	NIT6	Energy metabolism: Nitrogen metabolism	0	0	1000	0		1.7.1.4
GL0517	Carbonic anhydrase	co2[c] + h2o[c] -> hco3[c] + h[c]	(GL23170-R1) or (GL29865-R1)	GL23170-R1 GL29865-R1	(CAN1.1 or CAN1.2)	Energy metabolism: Nitrogen metabolism	0	0	1000	0		4.2.1.1
GL0518	Cyanate lyase	cya[c] + h[c] + hco3[c] -> cbm[c] + co2[c]	(GL26068-R1)	GL26068-R1	CYNS	Energy metabolism: Nitrogen metabolism	0	0	1000	0		4.2.1.104
GL0519	spontaneous reaction	cbm[c] + 2 h[c] -> nh3[c] + co2[c]				Energy metabolism: Nitrogen metabolism	0	0	1000	0
GL0520	Sulfite reductase (NADPH) flavoprotein	5 h[c] + 3 nadph[c] + slfi[c] -> 3 h2o[c] + 3 nadp[c] + h2s[c]	(GL20411-R1 and GL18754-R1)	GL20411-R1 GL18754-R1	(CYSJ and CYSI)	Energy metabolism: Sulfur metabolism	0	0	1000	0		1.8.1.2
GL0521	Sulfite oxidase	slf[c] + h2o2[c] <=> slfi[c] + o2[c] + h2o[c]	(GL19627-R1) or (GL23629-R1) or (GL23860-R1)	GL19627-R1 GL23629-R1 GL23860-R1	(SUOX1.1 or SUOX1.2 or SUOX1.3)	Energy metabolism: Sulfur metabolism	1	-1000	1000	0		1.8.3.1
GL0522	Phosphoadenosine phosphosulfate reductase	paps[c] + rthio[c] <=> 2 h[c] + pap[c] + slfi[c] + othio[c]	(GL31190-R1)	GL31190-R1	CYSH	Energy metabolism: Sulfur metabolism	1	-1000	1000	0		1.8.4.8
GL0523	Adenylyl-sulfate kinase	aps[c] + atp[c] -> adp[c] + h[c] + paps[c]	(GL25317-R1)	GL25317-R1	CYSC	Energy metabolism: Sulfur metabolism	0	0	1000	0		2.7.1.25
GL0524	Sulfate adenylyltransferase	atp[c] + h[c] + slf[c] -> aps[c] + ppi[c]	(GL25330-R1)	GL25330-R1	SAT	Energy metabolism: Sulfur metabolism	0	0	1000	0		2.7.7.4
GL0525	Cytochrome c	tslf[m] + 5 h2o[m] + 8 feri[m] -> 2 slf[m] + 8 fero[m] + 10 h[m]	(GL24144-R1)	GL24144-R1	SOXD	Energy metabolism: Sulfur metabolism	0	0	1000	0
GL0526	non-enzymatic	tslf[c] <=> s[c] + slfi[c]				Energy metabolism: Sulfur metabolism	1	-1000	1000	0
GL0527	3(2),5-bisphosphate nucleotidase	h2o[c] + pap[c] -> pi[c] + amp[c]	(GL23129-R1)	GL23129-R1	CYSQ	Energy metabolism: Sulfur metabolism	0	0	1000	0		3.1.3.7
GL0528	phosphoribosylformylglycinamidine synthase	atp[c] + fgar[c] + gln[c] + h2o[c] -> adp[c] + pi[c] + fgam[c] + glu[c] + h[c]	(GL16697-R1)	GL16697-R1	PFAS	Nucleotide metabolism: Purine metabolism	0	0	1000	0		6.3.5.3
GL0529	phosphoribosylformylglycinamidine cyclo-ligase	atp[c] + fgam[c] -> adp[c] + pi[c] + air[c] + 2 h[c]	(GL29731-R1)	GL29731-R1	ADE5	Nucleotide metabolism: Purine metabolism	0	0	1000	0		6.3.3.1
GL0530	phosphoribosylamine--glycine ligase	atp[c] + pram[c] + gly[c] -> adp[c] + pi[c] + gar[c] + h[c]	(GL29731-R1)	GL29731-R1	ADE5	Nucleotide metabolism: Purine metabolism	0	0	1000	0		6.3.4.13
GL0531	phosphoribosylaminoimidazole carboxylase	cair[c] + h[c] <=> air[c] + co2[c]	(GL16005-R1)	GL16005-R1	ADE2	Nucleotide metabolism: Purine metabolism	1	-1000	1000	0		4.1.1.21
GL0532	phosphoribosylaminoimidazole-succinocarboxamide synthase	atp[c] + cair[c] + asp[c] <=> adp[c] + pi[c] + saicar[c] + h[c]	(GL18703-R1) or (GL15683-R1)	GL18703-R1 GL15683-R1	(PURC1 or PURC2)	Nucleotide metabolism: Purine metabolism	1	-1000	1000	0		6.3.2.6
GL0533	adenine phosphoribosyltransferase	amp[c] + ppi[c] <=> ad[c] + prpp[c]	(GL18178-R1)	GL18178-R1	APRT	Nucleotide metabolism: Purine metabolism	1	-1000	1000	0		2.4.2.7
GL0534	adenine phosphoribosyltransferase	gmp[c] + ppi[c] <=> gn[c] + prpp[c]	(GL18178-R1)	GL18178-R1	APRT	Nucleotide metabolism: Purine metabolism	1	-1000	1000	0		2.4.2.7
GL0535	adenine phosphoribosyltransferase	aicar[c] + ppi[c] <=> aicad[c] + prpp[c]	(GL18178-R1)	GL18178-R1	APRT	Nucleotide metabolism: Purine metabolism	1	-1000	1000	0		2.4.2.7
GL0536	phosphoribosylaminoimidazolecarboxamide formyltransferase	imp[c] + h2o[c] <=> prfica[c]	(GL15686-R1)	GL15686-R1	PURH	Nucleotide metabolism: Purine metabolism	1	-1000	1000	0		2.1.2.3
GL0537	inosine triphosphate pyrophosphatase	gtp[c] + h2o[c] -> gmp[c] + ppi[c] + h[c]	(GL25036-R1)	GL25036-R1	ITPA	Nucleotide metabolism: Purine metabolism	0	0	1000	0		3.6.1.19
GL0538	inosine triphosphate pyrophosphatase	itp[c] + h2o[c] -> imp[c] + ppi[c] + h[c]	(GL25036-R1)	GL25036-R1	ITPA	Nucleotide metabolism: Purine metabolism	0	0	1000	0		3.6.1.19
GL0539	inosine triphosphate pyrophosphatase	dgtp[c] + h2o[c] -> dgmp[c] + ppi[c] + h[c]	(GL25036-R1)	GL25036-R1	ITPA	Nucleotide metabolism: Purine metabolism	0	0	1000	0		3.6.1.19
GL0540	inosine triphosphate pyrophosphatase	xtp[c] + h2o[c] -> xmp[c] + ppi[c] + h[c]	(GL25036-R1)	GL25036-R1	ITPA	Nucleotide metabolism: Purine metabolism	0	0	1000	0		3.6.1.19
GL0541	inosine triphosphate pyrophosphatase	ditp[c] + h2o[c] -> dimp[c] + ppi[c] + h[c]	(GL25036-R1)	GL25036-R1	ITPA	Nucleotide metabolism: Purine metabolism	0	0	1000	0		3.6.1.19
GL0542	adenylate cyclase	atp[c] -> camp[c] + ppi[c]	(GL25287-R1)	GL25287-R1		Nucleotide metabolism: Purine metabolism	0	0	1000	0		4.6.1.1
GL0543	adenylate cyclase	gtp[c] -> cgmp[c] + ppi[c]	(GL25287-R1)	GL25287-R1		Nucleotide metabolism: Purine metabolism	0	0	1000	0		4.6.1.1
GL0544	pyruvate kinase	atp[c] + pyr[c] <=> adp[c] + pep[c] + h[c]	(GL30680-R1)	GL30680-R1	PK	Nucleotide metabolism: Purine metabolism	1	-1000	1000	0		2.7.1.40
GL0545	pyruvate kinase	gtp[c] + pyr[c] <=> gdp[c] + pep[c] + h[c]	(GL30680-R1)	GL30680-R1	PK	Nucleotide metabolism: Purine metabolism	1	-1000	1000	0		2.7.1.40
GL0546	pyruvate kinase	datp[c] + pyr[c] <=> dadp[c] + pep[c] + h[c]	(GL30680-R1)	GL30680-R1	PK	Nucleotide metabolism: Purine metabolism	1	-1000	1000	0		2.7.1.40
GL0547	pyruvate kinase	dgtp[c] + pyr[c] <=> dgdp[c] + pep[c] + h[c]	(GL30680-R1)	GL30680-R1	PK	Nucleotide metabolism: Purine metabolism	1	-1000	1000	0		2.7.1.40
GL0548	exopolyphosphatase	pppgpp[c] + h2o[c] <=> ppgpp[c] + pi[c] + h[c]	(GL18424-R1)	GL18424-R1	PRUNE	Nucleotide metabolism: Purine metabolism	1	-1000	1000	0		3.6.1.11
GL0549	3',5'-cyclic-nucleotide phosphodiesterase	camp[c] + h2o[c] -> amp[c] + h[c]	(GL20729-R1)	GL20729-R1	CPDP	Nucleotide metabolism: Purine metabolism	0	0	1000	0		3.1.4.17
GL0550	3',5'-cyclic-nucleotide phosphodiesterase	cgmp[c] + h2o[c] -> gmp[c] + h[c]	(GL20729-R1)	GL20729-R1	CPDP	Nucleotide metabolism: Purine metabolism	0	0	1000	0		3.1.4.17
GL0551	guanylate kinase	atp[c] + gmp[c] <=> adp[c] + gdp[c]	(GL18724-R1)	GL18724-R1	GMK	Nucleotide metabolism: Purine metabolism	1	-1000	1000	0		2.7.4.8
GL0552	guanylate kinase	atp[c] + dgmp[c] <=> adp[c] + dgdp[c]	(GL18724-R1)	GL18724-R1	GMK	Nucleotide metabolism: Purine metabolism	1	-1000	1000	0		2.7.4.8
GL0553	ribonucleoside-diphosphate reductase	rthio[c] + adp[c] -> dadp[c] + othio[c] + h2o[c]	(GL23790-R1 and GL31337-R1) or (GL23790-R1 and GL31604-R1)	GL23790-R1 GL31337-R1 GL31604-R1	(RRM1 and (RRM2.1 or RRM2.2))	Nucleotide metabolism: Purine metabolism	0	0	1000	0		1.17.4.1
GL0554	ribonucleoside-diphosphate reductase	gdp[c] + rthio[c] -> dgdp[c] + othio[c] + h2o[c]	(GL23790-R1 and GL31337-R1) or (GL23790-R1 and GL31604-R1)	GL23790-R1 GL31337-R1 GL31604-R1	(RRM1 and (RRM2.1 or RRM2.2))	Nucleotide metabolism: Purine metabolism	0	0	1000	0		1.17.4.1
GL0555	purine-nucleoside phosphorylase	adn[c] + pi[c] -> ad[c] + r1p[c]	(GL20473-R1)	GL20473-R1	PUNA	Nucleotide metabolism: Purine metabolism	0	0	1000	0		2.4.2.1
GL0556	purine-nucleoside phosphorylase	inos[c] + pi[c] <=> hyxn[c] + r1p[c]	(GL20473-R1)	GL20473-R1	PUNA	Nucleotide metabolism: Purine metabolism	1	-1000	1000	0		2.4.2.1
GL0557	purine-nucleoside phosphorylase	dg[c] + pi[c] <=> gn[c] + dr1p[c]	(GL20473-R1)	GL20473-R1	PUNA	Nucleotide metabolism: Purine metabolism	1	-1000	1000	0		2.4.2.1
GL0558	purine-nucleoside phosphorylase	gsn[c] + pi[c] <=> gn[c] + r1p[c]	(GL20473-R1)	GL20473-R1	PUNA	Nucleotide metabolism: Purine metabolism	1	-1000	1000	0		2.4.2.1
GL0559	purine-nucleoside phosphorylase	xtsine[c] + pi[c] <=> xan[c] + r1p[c]	(GL20473-R1)	GL20473-R1	PUNA	Nucleotide metabolism: Purine metabolism	1	-1000	1000	0		2.4.2.1
GL0560	purine-nucleoside phosphorylase	2dan[c] + pi[c] <=> ad[c] + dr1p[c]	(GL20473-R1)	GL20473-R1	PUNA	Nucleotide metabolism: Purine metabolism	1	-1000	1000	0		2.4.2.1
GL0561	purine-nucleoside phosphorylase	hyxn[c] + dr1p[c] <=> din[c] + pi[c]	(GL20473-R1)	GL20473-R1	PUNA	Nucleotide metabolism: Purine metabolism	1	-1000	1000	0		2.4.2.1
GL0562	guanine deaminase	gn[c] + h2o[c] + h[c] -> xan[c] + nh3[c]	(GL24872-R1) or (GL23976-R1)	GL24872-R1 GL23976-R1	(GUAD1 or GUAD2)	Nucleotide metabolism: Purine metabolism	0	0	1000	0		3.5.4.3
GL0563	GMP synthase (glutamine-hydrolysing)	atp[c] + xmp[c] + nh3[c] -> amp[c] + ppi[c] + gmp[c] + 2 h[c]	(GL17919-R1)	GL17919-R1	GMPS	Nucleotide metabolism: Purine metabolism	0	0	1000	0		6.3.5.2
GL0564	GMP synthase (glutamine-hydrolysing)	atp[c] + xmp[c] + gln[c] + h2o[c] -> amp[c] + ppi[c] + gmp[c] + glu[c] + 2 h[c]	(GL17919-R1)	GL17919-R1	GMPS	Nucleotide metabolism: Purine metabolism	0	0	1000	0		6.3.5.2
GL0565	IMP dehydrogenase	imp[c] + nad[c] + h2o[c] -> xmp[c] + nadh[c] + h[c]	(GL26666-R1)	GL26666-R1	GUAB	Nucleotide metabolism: Purine metabolism	0	0	1000	0		1.1.1.205
GL0566	AMP deaminase	amp[c] + h2o[c] + h[c] -> imp[c] + nh3[c]	(GL23651-R1)	GL23651-R1	AMPD	Nucleotide metabolism: Purine metabolism	0	0	1000	0		3.5.4.6
GL0567	adenosine kinase	atp[c] + adn[c] -> adp[c] + amp[c] + h[c]	(GL30808-R1)	GL30808-R1	ADK	Nucleotide metabolism: Purine metabolism	0	0	1000	0		2.7.1.20
GL0568	adenosine deaminase	adn[c] + h2o[c] + h[c] -> inos[c] + nh3[c]	(GL24508-R1) or (GL24512-R1)	GL24508-R1 GL24512-R1	(ADA2.1 or ADA2.2)	Nucleotide metabolism: Purine metabolism	0	0	1000	0		3.5.4.4
GL0569	adenosine deaminase	h[c] + h2o[c] + 2dan[c] -> nh3[c] + din[c]	(GL24508-R1) or (GL24512-R1)	GL24508-R1 GL24512-R1	(ADA2.1 or ADA2.2)	Nucleotide metabolism: Purine metabolism	0	0	1000	0		3.5.4.4
GL0570	adenylate kinase	2 adp[c] <=> atp[c] + amp[c]	(GL22880-R1) or (GL30224-R1)	GL22880-R1 GL30224-R1	(AK1 or AK6)	Nucleotide metabolism: Purine metabolism	1	-1000	1000	0		2.7.4.3
GL0571	adenylate kinase	atp[c] + damp[c] <=> adp[c] + dadp[c]	(GL22880-R1) or (GL30224-R1)	GL22880-R1 GL30224-R1	(AK1 or AK6)	Nucleotide metabolism: Purine metabolism	1	-1000	1000	0		2.7.4.3
GL0572	adenylate kinase	2 adp[m] <=> atp[m] + amp[m]	(GL19805-R1)	GL19805-R1	AK2	Nucleotide metabolism: Purine metabolism	1	-1000	1000	0		2.7.4.3
GL0573	adenylate kinase	atp[m] + damp[m] <=> adp[m] + dadp[m]	(GL19805-R1)	GL19805-R1	AK2	Nucleotide metabolism: Purine metabolism	1	-1000	1000	0		2.7.4.3
GL0574	urate oxidase	urate[c] + o2[c] + h2o[c] -> hiura[c] + h2o2[c]	(GL23350-R1)	GL23350-R1	UAZ	Nucleotide metabolism: Purine metabolism	0	0	1000	0		1.7.3.3
GL0575	5-hydroxyisourate hydrolase	hiura[c] + h2o[c] -> houdhic[c] + h[c]	(GL30346-R1)	GL30346-R1	URAH	Nucleotide metabolism: Purine metabolism	0	0	1000	0		3.5.2.17
GL0576	spontaneous reaction	houdhic[c] + h[c] -> ratn[c] + co2[c]				Nucleotide metabolism: Purine metabolism	0	0	1000	0
GL0577	allantoin racemase	ratn[c] <=> satn[c]				Nucleotide metabolism: Purine metabolism	1	-1000	1000	0		5.1.99.3
GL0578	allantoinase	satn[c] + h2o[c] <=> att[c] + h[c]	(GL24291-R1)	GL24291-R1	ALLB	Nucleotide metabolism: Purine metabolism	1	-1000	1000	0		3.5.2.5
GL0579	allantoicase	att[c] + h2o[c] <=> ugc[c] + urea[c]	(GL25254-R1)	GL25254-R1	ALLC	Nucleotide metabolism: Purine metabolism	1	-1000	1000	0		3.5.3.4
GL0580	bis(5'-adenosyl)-triphosphatase	apppa[c] + h2o[c] -> adp[c] + amp[c] + 2 h[c]	(GL30211-R1)	GL30211-R1	FHIT	Nucleotide metabolism: Purine metabolism	0	0	1000	0		3.6.1.29
GL0581	ATP adenylyltransferase	adp[c] + atp[c] + h[c] -> pi[c] + appppa[c]	(GL23397-R1)	GL23397-R1	APA1_2	Nucleotide metabolism: Purine metabolism	0	0	1000	0		2.7.7.53
GL0582	ATP adenylyltransferase	slf[c] + appppa[c] -> aps[c] + atp[c]	(GL23397-R1)	GL23397-R1	APA1_2	Nucleotide metabolism: Purine metabolism	0	0	1000	0		2.7.7.53
GL0583	5-nucleotidase	damp[c] + h2o[c] -> 2dan[c] + pi[c]	(GL15482-R1)	GL15482-R1		Nucleotide metabolism: Purine metabolism	0	0	1000	0		3.1.3.5	KAAS
GL0584	Nucleoside diphosphate kinase	atp[c] + udp[c] -> adp[c] + utp[c]				Nucleotide metabolism: Purine metabolism	0	0	1000	0		2.7.4.6	metcyc
GL0585	Nucleoside diphosphate kinase	atp[c] + dtdp[c] -> adp[c] + dttp[c]				Nucleotide metabolism: Purine metabolism	0	0	1000	0		2.7.4.6	metcyc
GL0586	dihydroorotase	doroa[c] + h2o[c] <=> caasp[c] + h[c]	(GL31211-R1)	GL31211-R1	URA4	Nucleotide metabolism: Pyrimidine metabolism	1	-1000	1000	0		3.5.2.3
GL0587	dihydroorotate dehydrogenase (fumarate)	doroa[c] + fum[c] <=> oroa[c] + succ[c]	(GL30432-R1)	GL30432-R1	PYRD	Nucleotide metabolism: Pyrimidine metabolism	1	-1000	1000	0		1.3.98.1
GL0588	dihydroorotate dehydrogenase	doroa[c] + qn[c] -> oroa[c] + hqn[c]	(GL16722-R1)	GL16722-R1	DHODH	Nucleotide metabolism: Pyrimidine metabolism	0	0	1000	0		1.3.5.2
GL0589	orotate phosphoribosyltransferase	oroa[c] + prpp[c] <=> omp[c] + ppi[c]	(GL24054-R1)	GL24054-R1	PYRE	Nucleotide metabolism: Pyrimidine metabolism	1	-1000	1000	0		2.4.2.10
GL0590	orotidine-5'-phosphate decarboxylase	omp[c] + h[c] -> ump[c] + co2[c]	(GL31659-R1)	GL31659-R1	PYRF	Nucleotide metabolism: Pyrimidine metabolism	0	0	1000	0		4.1.1.23
GL0591	uridine kinase	atp[c] + cytd[c] -> adp[c] + cmp[c] + h[c]	(GL26017-R1)	GL26017-R1	UCK	Nucleotide metabolism: Pyrimidine metabolism	0	0	1000	0		2.7.1.48
GL0592	uridine kinase	utp[c] + cytd[c] -> udp[c] + cmp[c] + h[c]	(GL26017-R1)	GL26017-R1	UCK	Nucleotide metabolism: Pyrimidine metabolism	0	0	1000	0		2.7.1.48
GL0593	uridine kinase	gtp[c] + cytd[c] -> gdp[c] + cmp[c] + h[c]	(GL26017-R1)	GL26017-R1	UCK	Nucleotide metabolism: Pyrimidine metabolism	0	0	1000	0		2.7.1.48
GL0594	uridine kinase	itp[c] + cytd[c] -> idp[c] + cmp[c] + h[c]	(GL26017-R1)	GL26017-R1	UCK	Nucleotide metabolism: Pyrimidine metabolism	0	0	1000	0		2.7.1.48
GL0595	uridine kinase	atp[c] + uri[c] -> adp[c] + ump[c] + h[c]	(GL26017-R1)	GL26017-R1	UCK	Nucleotide metabolism: Pyrimidine metabolism	0	0	1000	0		2.7.1.48
GL0596	uridine kinase	utp[c] + uri[c] -> udp[c] + ump[c] + h[c]	(GL26017-R1)	GL26017-R1	UCK	Nucleotide metabolism: Pyrimidine metabolism	0	0	1000	0		2.7.1.48
GL0597	uridine kinase	gtp[c] + uri[c] -> gdp[c] + ump[c] + h[c]	(GL26017-R1)	GL26017-R1	UCK	Nucleotide metabolism: Pyrimidine metabolism	0	0	1000	0		2.7.1.48
GL0598	uridine kinase	itp[c] + uri[c] -> idp[c] + ump[c] + h[c]	(GL26017-R1)	GL26017-R1	UCK	Nucleotide metabolism: Pyrimidine metabolism	0	0	1000	0		2.7.1.48
GL0599	uridine kinase	datp[c] + cytd[c] -> dadp[c] + cmp[c] + h[c]	(GL26017-R1)	GL26017-R1	UCK	Nucleotide metabolism: Pyrimidine metabolism	0	0	1000	0		2.7.1.48
GL0600	uridine kinase	datp[c] + uri[c] -> dadp[c] + ump[c] + h[c]	(GL26017-R1)	GL26017-R1	UCK	Nucleotide metabolism: Pyrimidine metabolism	0	0	1000	0		2.7.1.48
GL0601	uridine kinase	dgtp[c] + uri[c] -> dgdp[c] + ump[c] + h[c]	(GL26017-R1)	GL26017-R1	UCK	Nucleotide metabolism: Pyrimidine metabolism	0	0	1000	0		2.7.1.48
GL0602	uridine kinase	dgtp[c] + cytd[c] -> dgdp[c] + cmp[c] + h[c]	(GL26017-R1)	GL26017-R1	UCK	Nucleotide metabolism: Pyrimidine metabolism	0	0	1000	0		2.7.1.48
GL0603	uridine kinase	dttp[c] + cytd[c] -> dtdp[c] + cmp[c] + h[c]	(GL26017-R1)	GL26017-R1	UCK	Nucleotide metabolism: Pyrimidine metabolism	0	0	1000	0		2.7.1.48
GL0604	uridine kinase	dttp[c] + uri[c] -> dtdp[c] + ump[c] + h[c]	(GL26017-R1)	GL26017-R1	UCK	Nucleotide metabolism: Pyrimidine metabolism	0	0	1000	0		2.7.1.48
GL0605	uridine kinase	dctp[c] + uri[c] -> dcdp[c] + ump[c] + h[c]	(GL26017-R1)	GL26017-R1	UCK	Nucleotide metabolism: Pyrimidine metabolism	0	0	1000	0		2.7.1.48
GL0606	uridine kinase	dutp[c] + uri[c] -> dudp[c] + ump[c] + h[c]	(GL26017-R1)	GL26017-R1	UCK	Nucleotide metabolism: Pyrimidine metabolism	0	0	1000	0		2.7.1.48
GL0607	uridine kinase	dctp[c] + cytd[c] -> dcdp[c] + cmp[c] + h[c]	(GL26017-R1)	GL26017-R1	UCK	Nucleotide metabolism: Pyrimidine metabolism	0	0	1000	0		2.7.1.48
GL0608	uridine kinase	dutp[c] + cytd[c] -> dudp[c] + cmp[c] + h[c]	(GL26017-R1)	GL26017-R1	UCK	Nucleotide metabolism: Pyrimidine metabolism	0	0	1000	0		2.7.1.48
GL0609	uridine phosphorylase	uri[m] + pi[m] <=> ura[m] + r1p[m]	(GL29934-R1)	GL29934-R1	UPP	Nucleotide metabolism: Pyrimidine metabolism	1	-1000	1000	0		2.4.2.3
GL0610	uridine phosphorylase	du[m] + pi[m] <=> ura[m] + dr1p[m]	(GL29934-R1)	GL29934-R1	UPP	Nucleotide metabolism: Pyrimidine metabolism	1	-1000	1000	0		2.4.2.3
GL0611	uridine nucleosidase	uri[m] + h2o[m] -> ura[m] + rib[m]	(GL31141-R1)	GL31141-R1	URH1	Nucleotide metabolism: Pyrimidine metabolism	0	0	1000	0		3.2.2.3
GL0612	uracil phosphoribosyltransferase	ump[c] + ppi[c] <=> ura[c] + prpp[c]	(GL26745-R1) or (GL26730-R1)	GL26745-R1 GL26730-R1	(UPRT1 or UPRT2)	Nucleotide metabolism: Pyrimidine metabolism	1	-1000	1000	0		2.4.2.9
GL0613	cytidine deaminase	cytd[c] + h2o[c] + h[c] -> uri[c] + nh3[c]	(GL24308-R1)	GL24308-R1	CDA	Nucleotide metabolism: Pyrimidine metabolism	0	0	1000	0		3.5.4.5
GL0614	cytidine deaminase	dc[c] + h2o[c] + h[c] -> du[c] + nh3[c]	(GL24308-R1)	GL24308-R1	CDA	Nucleotide metabolism: Pyrimidine metabolism	0	0	1000	0		3.5.4.5
GL0615	cytosine deaminase	cyts[c] + h2o[c] + h[c] -> ura[c] + nh3[c]	(GL30928-R1)	GL30928-R1	CODA	Nucleotide metabolism: Pyrimidine metabolism	0	0	1000	0		3.5.4.1
GL0616	pseudouridine-5'-phosphate glycosidase	ura[c] + r5p[c] <=> puri5p[c] + h2o[c]	(GL29974-R1) or (GL29974-R2)	GL29974-R1 GL29974-R2		Nucleotide metabolism: Pyrimidine metabolism	1	-1000	1000	0		3.2.-.-
GL0617	pseudouridine kinase	atp[c] + psdine[c] -> adp[c] + puri5p[c] + h[c]	(GL29974-R1) or (GL29974-R2)	GL29974-R1 GL29974-R2		Nucleotide metabolism: Pyrimidine metabolism	0	0	1000	0		2.7.1.83
GL0618	CTP synthase	atp[c] + utp[c] + nh3[c] -> adp[c] + pi[c] + ctp[c] + 2 h[c]	(GL24040-R1)	GL24040-R1	CTPS	Nucleotide metabolism: Pyrimidine metabolism	0	0	1000	0		6.3.4.2
GL0619	CTP synthase	atp[c] + utp[c] + gln[c] + h2o[c] -> adp[c] + pi[c] + ctp[c] + glu[c] + 2 h[c]	(GL24040-R1)	GL24040-R1	CTPS	Nucleotide metabolism: Pyrimidine metabolism	0	0	1000	0		6.3.4.2
GL0620	inosine triphosphate pyrophosphatase	utp[c] + h2o[c] -> ump[c] + ppi[c] + h[c]	(GL25036-R1)	GL25036-R1	ITPA	Nucleotide metabolism: Pyrimidine metabolism	0	0	1000	0		3.6.1.19
GL0621	thioredoxin reductase (NADPH)	othio[c] + nadph[c] + h[c] -> rthio[c] + nadp[c]	(GL24381-R1)	GL24381-R1	TRXB	Nucleotide metabolism: Pyrimidine metabolism	0	0	1000	0		1.8.1.9
GL0622	ribonucleoside-diphosphate reductase	rthio[c] + udp[c] -> dudp[c] + othio[c] + h2o[c]	(GL23790-R1 and GL31337-R1) or (GL23790-R1 and GL31604-R1)	GL23790-R1 GL31337-R1 GL31604-R1	(RRM1 and (RRM2.1 or RRM2.2))	Nucleotide metabolism: Pyrimidine metabolism	0	0	1000	0		1.17.4.1
GL0623	ribonucleoside-diphosphate reductase	rthio[c] + cdp[c] -> dcdp[c] + othio[c] + h2o[c]	(GL23790-R1 and GL31337-R1) or (GL23790-R1 and GL31604-R1)	GL23790-R1 GL31337-R1 GL31604-R1	(RRM1 and (RRM2.1 or RRM2.2))	Nucleotide metabolism: Pyrimidine metabolism	0	0	1000	0		1.17.4.1
GL0624	dUTP pyrophosphatase	dutp[c] + h2o[c] -> dump[c] + ppi[c] + h[c]	(GL18122-R1) or (GL25036-R1)	GL18122-R1 GL25036-R1	(DUT or ITPA)	Nucleotide metabolism: Pyrimidine metabolism	0	0	1000	0		3.6.1.23 3.6.1.19
GL0625	dTMP kinase	atp[c] + dtmp[c] <=> adp[c] + dtdp[c]	(GL21691-R1)	GL21691-R1	DTYMK	Nucleotide metabolism: Pyrimidine metabolism	1	-1000	1000	0		2.7.4.9
GL0626	dTMP kinase	atp[c] + dump[c] <=> adp[c] + dudp[c]	(GL21691-R1)	GL21691-R1	DTYMK	Nucleotide metabolism: Pyrimidine metabolism	1	-1000	1000	0		2.7.4.9
GL0627	dCMP deaminase	dcmp[c] + h2o[c] + h[c] -> dump[c] + nh3[c]	(GL30625-R1) or (GL30624-R1)	GL30625-R1 GL30624-R1	(COMEB1 or COMEB1)	Nucleotide metabolism: Pyrimidine metabolism	0	0	1000	0		3.5.4.12
GL0628	purine-nucleoside phosphorylase	du[c] + pi[c] -> ura[c] + dr1p[c]	(GL20473-R1)	GL20473-R1	PUNA	Nucleotide metabolism: Pyrimidine metabolism	0	0	1000	0		2.4.2.1
GL0629	Cytidylate kinase	adp[c] + cdp[c] <=> atp[c] + cmp[c]				Nucleotide metabolism: Pyrimidine metabolism	1	-1000	1000	0		2.7.4.14
GL0630	Cytidylate kinase	adp[c] + udp[c] <=> atp[c] + ump[c]				Nucleotide metabolism: Pyrimidine metabolism	1	-1000	1000	0		2.7.4.14
GL0631	cytidylate kinase	atp[c] + dcmp[c] <=> adp[c] + dcdp[c]				Nucleotide metabolism: Pyrimidine metabolism	1	-1000	1000	0		2.7.4.14
GL0632	5-Amino-6-(5-phosphoribosylamino)uracil reductase	apru[c] + h[c] + nadph[c] -> apdruci[c] + nadp[c]	(GL19803-R1)	GL19803-R1	RIBD	Metabolism of cofactors and vitamins: Riboflavin Metabolism	0	0	1000	0		1.1.1.193
GL0633	6,7-Dimethyl-8-ribityllumazine synthase	aura[c] + db4p[c] -> d8rl[c] + 2 h2o[c] + pi[c]	(GL24635-R1)	GL24635-R1	RIB4	Metabolism of cofactors and vitamins: Riboflavin Metabolism	0	0	1000	0		2.5.1.78
GL0634	Riboflavin synthase	2 d8rl[c] -> aura[c] + ribflav[c]	(GL30750-R1)	GL30750-R1	RIB5	Metabolism of cofactors and vitamins: Riboflavin Metabolism	0	0	1000	0		2.5.1.9
GL0635	Riboflavin kinase	ribflav[c] + atp[c] -> fmn[c] + adp[c] + h[c]	(GL20056-R1) or (GL26703-R1) or (GL18150-R1)	GL20056-R1 GL26703-R1 GL18150-R1	(FMN1.1 or FMN1.2 or FMN1.3)	Metabolism of cofactors and vitamins: Riboflavin Metabolism	0	0	1000	0		2.7.1.26
GL0636	Rriboflavin kinase, mitochondrial	ribflav[m] + atp[m] -> fmn[m] + adp[m] + h[m]	(GL20056-R1) or (GL26703-R1) or (GL18150-R1)	GL20056-R1 GL26703-R1 GL18150-R1	(FMN1.1 or FMN1.2 or FMN1.3)	Metabolism of cofactors and vitamins: Riboflavin Metabolism	0	0	1000	0		2.7.1.26
GL0637	FMN adenylyltransferase	fmn[c] + atp[c] + h[c] -> fad[c] + ppi[c]	(GL27043-R1) or (GL27041-R1)	GL27043-R1 GL27041-R1	(FLAD1.1 or FLAD1.2)	Metabolism of cofactors and vitamins: Riboflavin Metabolism	0	0	1000	0		2.7.7.2
GL0638	FMN adenylyltransferase, mitochondrial	fmn[m] + atp[m] + h[m] -> fad[m] + ppi[m]	(GL27043-R1) or (GL27041-R1)	GL27043-R1 GL27041-R1	(FLAD1.1 or FLAD1.2)	Metabolism of cofactors and vitamins: Riboflavin Metabolism	0	0	1000	0		2.7.7.2
GL0639	Pyrimidine phosphatase	apdruci[c] + h2o[c] -> aura[c] + pi[c]	(GL31290-R1) or (GL22258-R1)	GL31290-R1 GL22258-R1	(SDT1.1 or SDT1.2)	Metabolism of cofactors and vitamins: Riboflavin Metabolism	0	0	1000	0		3.1.3.-
GL0640	Acid phosphatase, extracellular	fmn[e] + h2o[e] -> ribflav[e] + pi[e]	(GL30997-R1) or (GL18407-R1)	GL30997-R1 GL18407-R1	(ACP1 or ACP2)	Metabolism of cofactors and vitamins: Riboflavin Metabolism	0	0	1000	0		3.1.3.2
GL0641	GTP cyclohydrolase II	gtp[c] + 3 h2o[c] -> d6rp5p[c] + for[c] + 2 h[c] + ppi[c]	(GL31218-R1) or (GL23554-R1)	GL31218-R1 GL23554-R1	(RIB1.1 or RIB1.2)	Metabolism of cofactors and vitamins: Riboflavin Metabolism	0	0	1000	0		3.5.4.25
GL0642	Diaminohydroxyphosphoribosylaminopyrimidine deaminase	d6rp5p[c] + h[c] + h2o[c] -> apru[c] + nh3[c]	(GL19803-R1)	GL19803-R1	RIBD	Metabolism of cofactors and vitamins: Riboflavin Metabolism	0	0	1000	0		3.5.4.26
GL0643	3,4-Dihydroxy-2-butanone-4-phosphate	rl5p[c] -> db4p[c] + for[c] + h[c]	(GL28091-R1)	GL28091-R1	RIB3	Metabolism of cofactors and vitamins: Riboflavin Metabolism	0	0	1000	0		4.1.99.12
GL0644	hydroxymethylpyrimidine kinase	atp[c] + top[c] -> adp[c] + ahmp[c] + h[c]	(GL22808-R1)	GL22808-R1	THI20	Metabolism of cofactors and vitamins: Thiamine metabolism	0	0	1000	0		2.7.1.49
GL0645	phosphomethylpyrimidine kinase	atp[c] + ahmp[c] -> adp[c] + ahmpp[c]	(GL22808-R1)	GL22808-R1	THI20	Metabolism of cofactors and vitamins: Thiamine metabolism	0	0	1000	0		2.7.4.7
GL0646	thiamine thiazole synthase	nad[c] + gly[c] + s[c] + 2 h[c] -> adpemtc[c] + nicd[c] + 3 h2o[c]	(GL23848-R1)	GL23848-R1	THI4	Metabolism of cofactors and vitamins: Thiamine metabolism	0	0	1000	0
GL0647	nudix hydrolase	adpemtc[c] + h2o[c] -> cthzp[c] + amp[c] + 4 h[c]				Metabolism of cofactors and vitamins: Thiamine metabolism	0	0	1000	0
GL0648	thiamine-phosphate diphosphorylase	ahmpp[c] + cthzp[c] + 2 h[c] -> thmp[c] + ppi[c] + co2[c]	(GL25730-R1)	GL25730-R1	THI6	Metabolism of cofactors and vitamins: Thiamine metabolism	0	0	1000	0		2.5.1.3
GL0649	thiamine-phosphate diphosphorylase	ahmpp[c] + thzp[c] + h[c] -> ppi[c] + thmp[c]	(GL25730-R1)	GL25730-R1	THI6	Metabolism of cofactors and vitamins: Thiamine metabolism	0	0	1000	0		2.5.1.3
GL0650	hydroxyethylthiazole kinase	atp[c] + thz[c] -> adp[c] + thzp[c] + h[c]	(GL25730-R1)	GL25730-R1	THI6	Metabolism of cofactors and vitamins: Thiamine metabolism	0	0	1000	0		2.7.1.50
GL0651	thiamine pyrophosphokinase	atp[c] + thdp[c] + 2 h[c] -> adp[c] + thtp[c]	(GL25960-R1)	GL25960-R1	THI80	Metabolism of cofactors and vitamins: Thiamine metabolism	0	0	1000	0		2.7.6.2
GL0652	thiamine pyrophosphokinase	atp[c] + thm[c] -> amp[c] + thdp[c] + h[c]	(GL25960-R1)	GL25960-R1	THI80	Metabolism of cofactors and vitamins: Thiamine metabolism	0	0	1000	0		2.7.6.2
GL0653	unclear reaction	h2o[c] + thmp[c] -> pi[c] + thm[c]	(GL24589-R2) or (GL24589-R1)	GL24589-R2 GL24589-R1		Metabolism of cofactors and vitamins: Thiamine metabolism	0	0	1000	0		3.1.3.-
GL0654	thiamine biosynthesis protein ThiC	air[c] + h[c] -> pi[c] + ac[c] + top[c]				Metabolism of cofactors and vitamins: Thiamine metabolism	0	0	1000	0		4.1.99.17	thiC
GL0655	unclear reaction	h2o[c] + thm[c] -> h[c] + top[c] + thz[c]				Metabolism of cofactors and vitamins: Thiamine metabolism	0	0	1000	0		3.5.99.2
GL0656	phosphoserine aminotransferase	pht[c] + akg[c] <=> ohpb[c] + glu[c]	(GL24824-R1)	GL24824-R1	PSAT1	Metabolism of cofactors and vitamins: Vitamin B6 metabolism	1	-1000	1000	0		2.6.1.52
GL0657	threonine synthase	pht[c] + h2o[c] -> hthr[c] + pi[c]	(GL15154-R1) or (GL20896-R1)	GL15154-R1 GL20896-R1	(THRC1.1 or THRC1.2)	Metabolism of cofactors and vitamins: Vitamin B6 metabolism	0	0	1000	0		4.2.3.1
GL0658	incomplete reaction	dxul[c] + hthr[c] -> vb6[c]				Metabolism of cofactors and vitamins: Vitamin B6 metabolism	0	0	1000	0
GL0659	pyridoxamine 5'-phosphate oxidase	pdxal[c] + nh3[c] + h2o2[c] <=> pdxam[c] + h2o[c] + o2[c]	(GL23761-R1)	GL23761-R1	PNPO	Metabolism of cofactors and vitamins: Vitamin B6 metabolism	1	-1000	1000	0		1.4.3.5
GL0660	pyridoxamine 5'-phosphate oxidase	vb6[c] + o2[c] <=> pdxal[c] + h2o2[c]	(GL23761-R1)	GL23761-R1	PNPO	Metabolism of cofactors and vitamins: Vitamin B6 metabolism	1	-1000	1000	0		1.4.3.5
GL0661	pyridoxamine 5'-phosphate oxidase	pdxam5pi[c] + h2o[c] + o2[c] + h[c] -> plp[c] + nh3[c] + h2o2[c]	(GL23761-R1)	GL23761-R1	PNPO	Metabolism of cofactors and vitamins: Vitamin B6 metabolism	0	0	1000	0		1.4.3.5
GL0662	pyridoxamine 5'-phosphate oxidase	pdxi5pi[c] + o2[c] + h[c] -> h2o2[c] + plp[c]	(GL23761-R1)	GL23761-R1	PNPO	Metabolism of cofactors and vitamins: Vitamin B6 metabolism	0	0	1000	0		1.4.3.5
GL0663	pyridoxine 4-dehydrogenase	vb6[c] + nadp[c] <=> pdxal[c] + nadph[c] + h[c]	(GL25591-R1) or (GL24569-R1) or (GL24569-R2)	GL25591-R1 GL24569-R1 GL24569-R2	(PND1.1 or PND1.2)	Metabolism of cofactors and vitamins: Vitamin B6 metabolism	1	-1000	1000	0		1.1.1.65
GL0664	pyridoxine kinase	atp[c] + pdxal[c] -> adp[c] + plp[c]	(GL16391-R1)	GL16391-R1	PDXK	Metabolism of cofactors and vitamins: Vitamin B6 metabolism	0	0	1000	0		2.7.1.35
GL0665	pyridoxine kinase	atp[c] + vb6[c] -> adp[c] + pdxi5pi[c] + h[c]	(GL16391-R1)	GL16391-R1	PDXK	Metabolism of cofactors and vitamins: Vitamin B6 metabolism	0	0	1000	0		2.7.1.35
GL0666	pyridoxine kinase	atp[c] + pdxam[c] -> adp[c] + pdxam5pi[c] + h[c]	(GL16391-R1)	GL16391-R1	PDXK	Metabolism of cofactors and vitamins: Vitamin B6 metabolism	0	0	1000	0		2.7.1.35
GL0667	pyridoxal phosphate phosphatase	plp[c] + h2o[c] -> pdxal[c] + pi[c] + h[c]	(GL25449-R1)	GL25449-R1	PHOSPHO2	Metabolism of cofactors and vitamins: Vitamin B6 metabolism	0	0	1000	0		3.1.3.74
GL0668	pyridoxal phosphate phosphatase	pdxi5pi[c] + h2o[c] -> vb6[c] + pi[c]	(GL25449-R1)	GL25449-R1	PHOSPHO2	Metabolism of cofactors and vitamins: Vitamin B6 metabolism	0	0	1000	0		3.1.3.74
GL0669	pyridoxal phosphate phosphatase	pdxam5pi[c] + h2o[c] -> pdxam[c] + pi[c]	(GL25449-R1)	GL25449-R1	PHOSPHO2	Metabolism of cofactors and vitamins: Vitamin B6 metabolism	0	0	1000	0		3.1.3.74
GL0670	5'-phosphate synthase pdxT subunit	ga3p[c] + rl5p[c] + gln[c] -> plp[c] + glu[c] + pi[c] + 3 h2o[c]	(GL18099-R1)	GL18099-R1	PDX2	Metabolism of cofactors and vitamins: Vitamin B6 metabolism	0	0	1000	0		4.3.3.6
GL0671	no ec	glal[c] + obut[c] + ala[c] -> vb6[c]				Metabolism of cofactors and vitamins: Vitamin B6 metabolism	0	0	1000	0			KAAS
GL0672	hydroxypyruvate decarboxylase	hpyr[c] + h[c] <=> glal[c] + co2[c]				Metabolism of cofactors and vitamins: Vitamin B5 metabolism	1	-1000	1000	0		4.1.1.40
GL0673	NAD(P) transhydrogenase	nadph[m] + nad[m] <=> nadp[m] + nadh[m]	(GL28475-R1)	GL28475-R1	NNT	Metabolism of cofactors and vitamins: Nicotinate and nicotinamide metabolism	1	-1000	1000	0		1.6.1.2
GL0674	Purine-nucleoside phosphorylase	nar[c] + pi[c] <=> nica[c] + r1p[c] + 2 h[c]	(GL20473-R1)	GL20473-R1	PUNA	Metabolism of cofactors and vitamins: Nicotinate and nicotinamide metabolism	1	-1000	1000	0		2.4.2.1
GL0675	Purine-nucleoside phosphorylase	nnr[c] + pi[c] <=> nicd[c] + r1p[c] + h[c]	(GL20473-R1)	GL20473-R1	PUNA	Metabolism of cofactors and vitamins: Nicotinate and nicotinamide metabolism	1	-1000	1000	0		2.4.2.1
GL0676	Nicotinate-nucleotide diphosphorylase (carboxylating)	prpp[c] + qa[c] + 2 h[c] -> ncn[c] + co2[c] + ppi[c]	(GL26615-R1)	GL26615-R1	QPRT	Metabolism of cofactors and vitamins: Nicotinate and nicotinamide metabolism	0	0	1000	0		2.4.2.19
GL0677	Nicotinate riboside kinase	ncn[c] + adp[c] + 2 h[c] -> nar[c] + atp[c]	(GL25758-R1)	GL25758-R1	NRK1_2	Metabolism of cofactors and vitamins: Nicotinate and nicotinamide metabolism	0	0	1000	0		2.7.1.173
GL0678	Ribosylnicotinamide kinase	nnr[c] + atp[c] -> nmn[c] + adp[c] + h[c]	(GL25758-R1)	GL25758-R1	NRK1_2	Metabolism of cofactors and vitamins: Nicotinate and nicotinamide metabolism	0	0	1000	0		2.7.1.22
GL0679	NAD kinase	atp[c] + nad[c] -> adp[c] + h[c] + nadp[c]	(GL25778-R1)	GL25778-R1	NADK2	Metabolism of cofactors and vitamins: Nicotinate and nicotinamide metabolism	0	0	1000	0		2.7.1.23
GL0680	NADH kinase	atp[m] + nadh[m] -> adp[m] + h[m] + nadph[m]	(GL18595-R1)	GL18595-R1	NADK1	Metabolism of cofactors and vitamins: Nicotinate and nicotinamide metabolism	0	0	1000	0		2.7.1.86
GL0681	Nicotinamide-nucleotide adenylyltransferase, mitochondrial	nmn[c] + atp[c] + h[c] <=> nad[c] + ppi[c]	(GL24452-R1)	GL24452-R1	NMNAT	Metabolism of cofactors and vitamins: Nicotinate and nicotinamide metabolism	1	-1000	1000	0		2.7.7.1
GL0682	Nicotinate-nucleotide adenylyltransferase	ncn[c] + atp[c] + h[c] <=> dmnad[c] + ppi[c]	(GL24452-R1)	GL24452-R1	NMNAT	Metabolism of cofactors and vitamins: Nicotinate and nicotinamide metabolism	1	-1000	1000	0		2.7.7.18
GL0683	Pyrimidine and pyridine-specific 5'-nucleotidase	nmn[c] + h2o[c] -> nnr[c] + pi[c]	(GL31290-R1) or (GL22258-R1)	GL31290-R1 GL22258-R1	(SDT1.1 or SDT1.2)	Metabolism of cofactors and vitamins: Nicotinate and nicotinamide metabolism	0	0	1000	0		3.1.3.-
GL0684	Pyrimidine and pyridine-specific 5'-nucleotidase	ncn[c] + h2o[c] + h[c] -> nar[c] + pi[c]	(GL31290-R1) or (GL22258-R1)	GL31290-R1 GL22258-R1	(SDT1.1 or SDT1.2)	Metabolism of cofactors and vitamins: Nicotinate and nicotinamide metabolism	0	0	1000	0		3.1.3.-
GL0685	Uridine nucleosidase	nnr[c] + h2o[c] -> nicd[c] + rib[c] + h[c]	(GL31141-R1)	GL31141-R1	URH1	Metabolism of cofactors and vitamins: Nicotinate and nicotinamide metabolism	0	0	1000	0		3.2.2.3
GL0686	Uridine nucleosidase	nar[c] + h2o[c] -> nica[c] + rib[c] + 2 h[c]	(GL31141-R1)	GL31141-R1	URH1	Metabolism of cofactors and vitamins: Nicotinate and nicotinamide metabolism	0	0	1000	0		3.2.2.3
GL0687	NAD nucleosidase	nad[c] + h2o[c] -> adprib[c] + nicd[c] + h[c]	(GL29719-R1) or (GL25683-R1) or (GL15763-R1) or (GL19452-R1) or (GL25562-R1) or (GL26051-R1)	GL29719-R1 GL25683-R1 GL15763-R1 GL19452-R1 GL25562-R1 GL26051-R1		Metabolism of cofactors and vitamins: Nicotinate and nicotinamide metabolism	0	0	1000	0		3.5.1.-
GL0688	Nicotinamidase, mitochondrial	nicd[m] + h2o[m] -> nica[m] + nh3[m]	(GL31139-R1)	GL31139-R1	PNC1	Metabolism of cofactors and vitamins: Nicotinate and nicotinamide metabolism	0	0	1000	0		3.5.1.19
GL0689	Nicotinamidase	nicd[c] + h2o[c] -> nica[c] + nh3[c]	(GL31139-R1)	GL31139-R1	PNC1	Metabolism of cofactors and vitamins: Nicotinate and nicotinamide metabolism	0	0	1000	0		3.5.1.19
GL0690	Nicotinate phosphoribosyltransferase	nica[c] + prpp[c] + atp[c] + h2o[c] <=> ncn[c] + ppi[c] + adp[c] + pi[c]	(GL25862-R1)	GL25862-R1	NAPRT1	Metabolism of cofactors and vitamins: Nicotinate and nicotinamide metabolism	1	-1000	1000	0		6.3.4.21
GL0691	NAD synthase (glutamine)	dmnad[c] + gln[c] + atp[c] + h2o[c] -> glu[c] + amp[c] + nad[c] + ppi[c] + h[c]	(GL21958-R1)	GL21958-R1	QNS1	Metabolism of cofactors and vitamins: Nicotinate and nicotinamide metabolism	0	0	1000	0		6.3.5.1
GL0692	2-Dehydropantoate 2-reductase, mitochondrial	akp[m] + h[m] + nadph[m] <=> pant[m] + nadp[m]	(GL16815-R1) or (GL22910-R1) or (GL29423-R1)	GL16815-R1 GL22910-R1 GL29423-R1	(PANE1 or PANE2 or PANE3)	Metabolism of cofactors and vitamins: Pantothenate and CoA biosynthesis	1	-1000	1000	0		1.1.1.169
GL0693	Acetohydroxy acid isomeroreductase, mitochondrial	alac[m] + h[m] + nadph[m] -> dmbut[m] + nadp[m]	(GL25971-R1)	GL25971-R1	ILVC	Metabolism of cofactors and vitamins: Pantothenate and CoA biosynthesis	0	0	1000	0		1.1.1.86
GL0694	3-Methyl-2-oxobutanoate hydroxymethyltransferase	omval[m] + metthf[m] + h2o[m] -> akp[m] + thf[m]	(GL24034-R1)	GL24034-R1	PANB	Metabolism of cofactors and vitamins: Pantothenate and CoA biosynthesis	0	0	1000	0		2.1.2.11
GL0695	Branched-chain amino acid aminotransferase II	val[m] + akg[m] <=> omval[m] + glu[m]	(GL18545-R1) or (GL29910-R1)	GL18545-R1 GL29910-R1	(ILVE1 or ILVE2)	Metabolism of cofactors and vitamins: Pantothenate and CoA biosynthesis	1	-1000	1000	0		2.6.1.42
GL0696	Dephospho-CoA kinase	dpcoa[c] + atp[c] -> acp[c] + adp[c] + h[c] + pap[c]	(GL24486-R1)	GL24486-R1	COAE	Metabolism of cofactors and vitamins: Pantothenate and CoA biosynthesis	0	0	1000	0		2.7.1.24
GL0697	Pantothenate kinase II	pnto[c] + atp[c] -> ppnto[c] + adp[c] + h[c]	(GL30357-R1)	GL30357-R1	COAW	Metabolism of cofactors and vitamins: Pantothenate and CoA biosynthesis	0	0	1000	0		2.7.1.33
GL0698	Pantothenate kinase II	pnte[c] + atp[c] -> 4ppnte[c] + adp[c] + h[c]	(GL30357-R1)	GL30357-R1	COAW	Metabolism of cofactors and vitamins: Pantothenate and CoA biosynthesis	0	0	1000	0		2.7.1.33
GL0699	Pantetheine-phosphate adenylyltransferase	4ppnte[c] + atp[c] + h[c] -> dpcoa[c] + ppi[c]	(GL24700-R1)	GL24700-R1	COAD	Metabolism of cofactors and vitamins: Pantothenate and CoA biosynthesis	0	0	1000	0		2.7.7.3
GL0700	4'-Phosphopantetheinyl transferase	apoacp[c] + coa[c] <=> pap[c] + acp[c]	(GL26698-R1)	GL26698-R1	ACPT	Metabolism of cofactors and vitamins: Pantothenate and CoA biosynthesis	1	-1000	1000	0		2.7.8.7
GL0701	Phosphopantothenoylcysteine decarboxylase	ppntocys[c] + h[c] -> co2[c] + 4ppnte[c]	(GL23627-R1)	GL23627-R1	COAC	Metabolism of cofactors and vitamins: Pantothenate and CoA biosynthesis	0	0	1000	0		4.1.1.36
GL0702	Dihydroxy-acid dehydratase (2,3-dihydroxy-3-methylbutanoate), mitochondrial	dmbut[m] -> omval[m] + h2o[m]	(GL19372-R1) or (GL23768-R1)	GL19372-R1 GL23768-R1	(ILVD1.1 or ILCD1.2)	Metabolism of cofactors and vitamins: Pantothenate and CoA biosynthesis	0	0	1000	0		4.2.1.9
GL0703	Pantothenate synthase	bala[c] + pant[c] + atp[c] -> amp[c] + pnto[c] + h[c] + ppi[c]	(GL24943-R1)	GL24943-R1	PANC	Metabolism of cofactors and vitamins: Pantothenate and CoA biosynthesis	0	0	1000	0		6.3.2.1
GL0704	Phosphopantothenate-cysteine ligase	ppnto[c] + cys[c] + ctp[c] -> ppntocys[c] + cmp[c] + h[c] + ppi[c]	(GL27634-R1)	GL27634-R1	COAB	Metabolism of cofactors and vitamins: Pantothenate and CoA biosynthesis	0	0	1000	0		6.3.2.5
GL0705	Aspartate 1 decarboxylase	asp[c] + h[c] -> bala[c] + co2[c]				Metabolism of cofactors and vitamins: Pantothenate and CoA biosynthesis	0	0	1000	0
GL0706	8-amino-7-oxononanoate synthase	chcoa[c] + ala[c] + h[c] -> aona[c] + coa[c] + co2[c]	(GL19660-R1)	GL19660-R1	BIOF	Metabolism of cofactors and vitamins: Biotin metabolism	0	0	1000	0		2.3.1.47
GL0707	8-amino-7-oxononanoate synthase	chcoa[m] + ala[m] + h[m] -> aona[m] + coa[m] + co2[m]	(GL19660-R1)	GL19660-R1	BIOF	Metabolism of cofactors and vitamins: Biotin metabolism	0	0	1000	0		2.3.1.47
GL0708	adenosylmethionine---8-amino-7-oxononanoate aminotransferase	sam[m] + aona[m] -> samob[m] + danna[m]	(GL17915-R1)	GL17915-R1	BIO1	Metabolism of cofactors and vitamins: Biotin metabolism	0	0	1000	0		2.6.1.62
GL0709	dethiobiotin synthetase	atp[m] + danna[m] + co2[m] -> adp[m] + pi[m] + dtb[m] + 3 h[m]	(GL17915-R1)	GL17915-R1	BIO3	Metabolism of cofactors and vitamins: Biotin metabolism	0	0	1000	0		6.3.3.3
GL0710	biotin synthase	dtb[m] + s[m] + 2 sam[m] -> bt[m] + 2 dad5[m] + 2 met[m]	(GL29355-R1)	GL29355-R1	BIOB	Metabolism of cofactors and vitamins: Biotin metabolism	0	0	1000	0		2.8.1.6
GL0711	biotin--protein ligase	atp[c] + bt[c] + h[c] -> ppi[c] + btamp[c]	(GL20927-R1)	GL20927-R1	HLCS	Metabolism of cofactors and vitamins: Biotin metabolism	0	0	1000	0		6.3.4.9 6.3.4.10 6.3.4.11 6.3.4.15
GL0712	biotin--protein ligase	btamp[c] -> amp[c] + bccp[c] + h[c]	(GL20927-R1)	GL20927-R1	HLCS	Metabolism of cofactors and vitamins: Biotin metabolism	0	0	1000	0		6.3.4.9 6.3.4.10 6.3.4.11 6.3.4.15
GL0713	B-ketoacyl-ACP synthase (c10,0), fatty acyl CoA synthase	6 h[m] + 4 nadph[m] + 3 malcoa[m] -> 2 h2o[m] + 2 co2[m] + 4 nadp[m] + 2 coa[m] + chcoa[m]	(GL29324-R1) or (GL19135-R1) or (GL24906-R1)	GL29324-R1 GL19135-R1 GL24906-R1	(FABG1.1 or FABG1.2 or FABG1.3)	Metabolism of cofactors and vitamins: Biotin metabolism	0	0	1000	0		1.1.1.100	KAAS
GL0714	lipoyl synthase	2 sam[m] + 2 s[m] + c80acp[m] -> 2 met[m] + lpacp[m] + 2 dad5[m]	(GL29916-R1)	GL29916-R1	LIPA	Metabolism of cofactors and vitamins: Lipoic acid metabolism	0	0	1000	0		2.8.1.8
GL0715	lipoyl synthase	2 sam[m] + 2 s[m] + pn6ol[m] -> 2 met[m] + 2 dad5[m] + pn6ll[m]	(GL29916-R1)	GL29916-R1	LIPA	Metabolism of cofactors and vitamins: Lipoic acid metabolism	0	0	1000	0		2.8.1.8
GL0716	lipoyl synthase	2 sam[c] + 2 s[c] + c80acp[c] <=> 2 met[c] + lpacp[c] + 2 dad5[c]	(GL29916-R1)	GL29916-R1	LIPA	Metabolism of cofactors and vitamins: Lipoic acid metabolism	1	-1000	1000	0		2.8.1.8
GL0717	lipoyl(octanoyl) transferase	c80acp[m] + apop[m] -> h[m] + pn6ol[m] + acp[m]	(GL29343-R1)	GL29343-R1	LIPB	Metabolism of cofactors and vitamins: Lipoic acid metabolism	0	0	1000	0		2.3.1.181
GL0718	lipoyl(octanoyl) transferase	lpacp[m] + apop[m] -> h[m] + pn6ll[m] + acp[m]	(GL29343-R1)	GL29343-R1	LIPB	Metabolism of cofactors and vitamins: Lipoic acid metabolism	0	0	1000	0		2.3.1.181
GL0719	lipoate-protein ligase A	atp[c] + h[c] + lipt[c] -> ppi[c] + lipamp[c]	(GL31522-R1)	GL31522-R1	LPLA	Metabolism of cofactors and vitamins: Lipoic acid metabolism	0	0	1000	0		2.7.7.63
GL0720	lipoate-protein ligase A	lipamp[c] + apop[c] -> 2 h[c] + amp[c] + pn6ll[c]	(GL31522-R1)	GL31522-R1	LPLA	Metabolism of cofactors and vitamins: Lipoic acid metabolism	0	0	1000	0		2.7.7.63
GL0721	cyclic pyranopterin phosphate synthase	gtp[c] + h2o[c] -> cpmp[c] + ppi[c] + h[c]	(GL30063-R1)	GL30063-R1	MOCS1	Metabolism of cofactors and vitamins: Folate biosynthesis	0	0	1000	0		4.1.99.18
GL0722	GTP cyclohydrolase I	gtp[c] + h2o[c] + h[c] -> fpyntp[c]	(GL31331-R1)	GL31331-R1	GCH1	Metabolism of cofactors and vitamins: Folate biosynthesis	0	0	1000	0		3.5.4.16
GL0723	GTP cyclohydrolase I	fpyntp[c] + h2o[c] -> diantp[c] + for[c] + 2 h[c]	(GL31331-R1)	GL31331-R1	GCH1	Metabolism of cofactors and vitamins: Folate biosynthesis	0	0	1000	0		3.5.4.16
GL0724	GTP cyclohydrolase I	diantp[c] -> diatrpao[c]	(GL31331-R1)	GL31331-R1	GCH1	Metabolism of cofactors and vitamins: Folate biosynthesis	0	0	1000	0		3.5.4.16
GL0725	GTP cyclohydrolase I	diatrpao[c] -> ahtd[c] + h2o[c]	(GL31331-R1)	GL31331-R1	GCH1	Metabolism of cofactors and vitamins: Folate biosynthesis	0	0	1000	0		3.5.4.16
GL0726	alkaline phosphatase	ahtd[c] + 3 h2o[c] -> dhp[c] + 3 pi[c] + 2 h[c]	(GL20807-R1)	GL20807-R1	PHOD1	Metabolism of cofactors and vitamins: Folate biosynthesis	0	0	1000	0		3.1.3.1
GL0727	alkaline phosphatase	ahtd[e] + 3 h2o[e] -> dhp[e] + 3 pi[e] + 2 h[e]	(GL24589-R2) or (GL24589-R1)	GL24589-R2 GL24589-R1	(PHOD2.1 or PHOD2.2)	Metabolism of cofactors and vitamins: Folate biosynthesis	0	0	1000	0		3.1.3.1
GL0728	alkaline phosphatase	h2o[c] + d6pgc[c] -> pi[c] + glca[c]	(GL20807-R1)	GL20807-R1	PHOD1	Metabolism of cofactors and vitamins: Folate biosynthesis	0	0	1000	0		3.1.3.1
GL0729	alkaline phosphatase	h2o[e] + d6pgc[e] -> pi[e] + glcna[e] + 2 h[e]	(GL24589-R2) or (GL24589-R1)	GL24589-R2 GL24589-R1	(PHOD2.1 or PHOD2.2)	Metabolism of cofactors and vitamins: Folate biosynthesis	0	0	1000	0		3.1.3.1
GL0730	dihydropteroate synthase	ahhmp[c] + abee[c] -> dhpt[c] + h2o[c]	(GL26867-R1) or (GL26871-R1)	GL26867-R1 GL26871-R1	(FOLKP1 or FOLKP2)	Metabolism of cofactors and vitamins: Folate biosynthesis	0	0	1000	0		2.5.1.15
GL0731	dihydropteroate synthase	ahhmd[c] + abee[c] -> ppi[c] + dhpt[c]	(GL26867-R1) or (GL26871-R1)	GL26867-R1 GL26871-R1	(FOLKP1 or FOLKP2)	Metabolism of cofactors and vitamins: Folate biosynthesis	0	0	1000	0		2.5.1.15
GL0732	dihydropteroate synthase	ahhmp[m] + abee[m] -> dhpt[m] + h2o[m]	(GL26867-R1) or (GL26871-R1)	GL26867-R1 GL26871-R1	(FOLKP1 or FOLKP2)	Metabolism of cofactors and vitamins: Folate biosynthesis	0	0	1000	0		2.5.1.15
GL0733	dihydropteroate synthase	ahhmd[m] + abee[m] -> ppi[m] + dhpt[m]	(GL26867-R1) or (GL26871-R1)	GL26867-R1 GL26871-R1	(FOLKP1 or FOLKP2)	Metabolism of cofactors and vitamins: Folate biosynthesis	0	0	1000	0		2.5.1.15
GL0734	2-amino-4-hydroxy-6-hydroxymethyldihydropteridine diphosphokinase	atp[c] + ahhmp[c] -> amp[c] + ahhmd[c] + h[c]	(GL26867-R1) or (GL26871-R1)	GL26867-R1 GL26871-R1	(FOLKP1 or FOLKP2)	Metabolism of cofactors and vitamins: Folate biosynthesis	0	0	1000	0		2.7.6.3
GL0735	folylpolyglutamate synthase	atp[c] + dhpt[c] + glu[c] -> adp[c] + pi[c] + dhf[c] + h[c]	(GL31600-R1) or (GL19435-R1)	GL31600-R1 GL19435-R1	(FPGS1 or FPGS2)	Metabolism of cofactors and vitamins: Folate biosynthesis	0	0	1000	0		6.3.2.17
GL0736	folylpolyglutamate synthase	atp[c] + thf[c] + glu[c] -> adp[c] + pi[c] + thfg[c] + h[c]	(GL31600-R1) or (GL19435-R1)	GL31600-R1 GL19435-R1	(FPGS1 or FPGS2)	Metabolism of cofactors and vitamins: Folate biosynthesis	0	0	1000	0		6.3.2.17
GL0737	dihydrofolate reductase	h[c] + nadph[c] + dhf[c] -> thf[c] + nadp[c]	(GL30256-R1)	GL30256-R1	FOLA	Metabolism of cofactors and vitamins: Folate biosynthesis	0	0	1000	0		1.5.1.3
GL0738	dihydrofolate reductase	2 h[c] + 2 nadph[c] + fol[c] -> 2 nadp[c] + thf[c]	(GL30256-R1)	GL30256-R1	FOLA	Metabolism of cofactors and vitamins: Folate biosynthesis	0	0	1000	0		1.5.1.3
GL0739	dihydrofolate reductase	nadp[c] + dhf[c] -> h[c] + nadph[c] + fol[c]	(GL30256-R1)	GL30256-R1	FOLA	Metabolism of cofactors and vitamins: Folate biosynthesis	0	0	1000	0		1.5.1.3
GL0740	para-aminobenzoate synthetase	chor[c] + gln[c] -> adchor[c] + glu[c]	(GL30289-R1)	GL30289-R1	PAB	Metabolism of cofactors and vitamins: Folate biosynthesis	0	0	1000	0		2.6.1.85
GL0741	4-amino-4-deoxychorismate pyruvate-lyase	adchor[c] <=> abee[c] + pyr[c] + h[c]				Metabolism of cofactors and vitamins: Folate biosynthesis	1	-1000	1000	0		4.1.3.38
GL0742	Dihydroneopterin aldolase	dhp[c] -> ahhmp[c] + glal[c]				Metabolism of cofactors and vitamins: Folate biosynthesis	0	0	1000	0		4.1.2.25
GL0743	aminomethyltransferase	methf[c] + h2o[c] -> foli[c] + h[c]	(GL22957-R1)	GL22957-R1	AMT	Metabolism of cofactors and vitamins: One carbon pool by folate	0	0	1000	0		2.1.2.10
GL0744	phosphoribosylaminoimidazolecarboxamide formyltransferase	10fthfh[c] + aicar[c] <=> thf[c] + prfica[c]	(GL15686-R1)	GL15686-R1	PURH	Metabolism of cofactors and vitamins: One carbon pool by folate	1	-1000	1000	0		2.1.2.3
GL0745	phosphoribosylglycinamide formyltransferase	10fthfh[c] + gar[c] <=> thf[c] + fgar[c] + h[c]	(GL29370-R1)	GL29370-R1		Metabolism of cofactors and vitamins: One carbon pool by folate	1	-1000	1000	0		2.1.2.2
GL0746	phosphoribosylglycinamide formyltransferase	gar[c] + methf[c] + h2o[c] -> fgar[c] + thf[c] + 2 h[c]	(GL29370-R1)	GL29370-R1		Metabolism of cofactors and vitamins: One carbon pool by folate	0	0	1000	0		2.1.2.2
GL0747	methionyl-tRNA formyltransferase	lmettrna[c] + 10fthfh[c] -> thf[c] + fofmet[c] + h[c]	(GL15239-R1)	GL15239-R1	MTFMT	Metabolism of cofactors and vitamins: One carbon pool by folate	0	0	1000	0		2.1.2.9
GL0748	methionyl-tRNA formyltransferase	lmettrna[m] + 10fthfh[m] -> thf[m] + fofmet[m] + h[m]	(GL15239-R1)	GL15239-R1	MTFMT	Metabolism of cofactors and vitamins: One carbon pool by folate	0	0	1000	0		2.1.2.9
GL0749	thymidylate synthase	dump[c] + metthf[c] -> dhf[c] + dtmp[c]	(GL24266-R1)	GL24266-R1	TYMS	Metabolism of cofactors and vitamins: One carbon pool by folate	0	0	1000	0		2.1.1.45
GL0750	formyltetrahydrofolate synthetase	thf[c] + for[c] + atp[c] -> adp[c] + pi[c] + 10fthfh[c]	(GL24693-R1)	GL24693-R1	MTHFD	Metabolism of cofactors and vitamins: One carbon pool by folate	0	0	1000	0		6.3.4.3
GL0751	methenyltetrahydrofolate cyclohydrolase	methf[c] + h2o[c] <=> 10fthfh[c] + h[c]	(GL24693-R1)	GL24693-R1	MTHFD	Metabolism of cofactors and vitamins: One carbon pool by folate	1	-1000	1000	0		3.5.4.9
GL0752	methylenetetrahydrofolate dehydrogenase (NADP+)	metthf[c] + nadp[c] <=> methf[c] + nadph[c]	(GL24693-R1)	GL24693-R1	MTHFD	Metabolism of cofactors and vitamins: One carbon pool by folate	1	-1000	1000	0		1.5.1.5
GL0753	5-formyltetrahydrofolate cyclo-ligase	atp[c] + foli[c] -> adp[c] + pi[c] + methf[c]	(GL27636-R1)	GL27636-R1	MTHFS	Metabolism of cofactors and vitamins: One carbon pool by folate	0	0	1000	0		6.3.3.2
GL0754	5-formyltetrahydrofolate cyclo-ligase	atp[m] + foli[m] -> adp[m] + pi[m] + methf[m]	(GL27636-R1)	GL27636-R1	MTHFS	Metabolism of cofactors and vitamins: One carbon pool by folate	0	0	1000	0		6.3.3.2
GL0755	methylenetetrahydrofolate dehydrogenase (NAD+)	metthf[c] + nad[c] <=> methf[c] + nadh[c]	(GL31646-R1)	GL31646-R1	MTD1	Metabolism of cofactors and vitamins: One carbon pool by folate	1	-1000	1000	0		1.5.1.15
GL0756	methylenetetrahydrofolate reductase (NADPH)	metthf[c] + nadph[c] + h[c] -> mthf[c] + nadp[c]	(GL21649-R1) or (GL24633-R1)	GL21649-R1 GL24633-R1	(MTHFR1 or MTHFR2)	Metabolism of cofactors and vitamins: One carbon pool by folate	0	0	1000	0		1.5.1.20
GL0757	porphobilinogen synthase	2 amievul[c] -> ppbg[c] + 2 h2o[c] + h[c]	(GL25682-R1)	GL25682-R1	ALAD	Metabolism of cofactors and vitamins: Porphyrin and chlorophyll metabolism	0	0	1000	0		4.2.1.24
GL0758	hydroxymethylbilane synthase	4 ppbg[c] + h2o[c] <=> hmtb[c] + 4 nh3[c]	(GL30153-R1)	GL30153-R1	HMBS	Metabolism of cofactors and vitamins: Porphyrin and chlorophyll metabolism	1	-1000	1000	0		2.5.1.61
GL0759	uroporphyrinogen-III synthase	hmtb[c] -> uprg[c] + h2o[c]	(GL22504-R1)	GL22504-R1	UROS	Metabolism of cofactors and vitamins: Porphyrin and chlorophyll metabolism	0	0	1000	0		4.2.1.75
GL0760	uroporphyrinogen decarboxylase	uprg[c] + 4 h[c] -> cpgiii[c] + 4 co2[c]	(GL26657-R1)	GL26657-R1	UROD	Metabolism of cofactors and vitamins: Porphyrin and chlorophyll metabolism	0	0	1000	0		4.1.1.37
GL0761	uroporphyrinogen decarboxylase	udpgi[c] -> cpgi[c] + 4 co2[c] + 4 h[c]	(GL26657-R1)	GL26657-R1	UROD	Metabolism of cofactors and vitamins: Porphyrin and chlorophyll metabolism	0	0	1000	0		4.1.1.37
GL0762	spontaneous reaction	hmtb[c] + 8 h[c] -> udpgi[c] + h2o[c]				Metabolism of cofactors and vitamins: Porphyrin and chlorophyll metabolism	0	0	1000	0
GL0763	coproporphyrinogen III oxidase	cpgiii[c] + o2[c] + 2 h[c] -> ppgix[c] + 2 co2[c] + 2 h2o[c]	(GL18616-R1) or (GL19284-R1)	GL18616-R1 GL19284-R1	(CPOX1 or CPOX2)	Metabolism of cofactors and vitamins: Porphyrin and chlorophyll metabolism	0	0	1000	0		1.3.3.3
GL0764	oxygen-dependent protoporphyrinogen oxidase	ppgix[m] + 3 o2[m] -> pprix[m] + 3 h2o2[m]	(GL22520-R1)	GL22520-R1	PPOX	Metabolism of cofactors and vitamins: Porphyrin and chlorophyll metabolism	0	0	1000	0		1.3.3.4
GL0765	ferrochelatase	pprix[m] + fe2[m] -> heme[m] + 2 h[m]	(GL17841-R1)	GL17841-R1	FECH	Metabolism of cofactors and vitamins: Porphyrin and chlorophyll metabolism	0	0	1000	0		4.99.1.1
GL0766	uroporphyrin-III C-methyltransferase	2 sam[m] + uprg[m] -> 2 sah[m] + pre2[m] + h[m]	(GL31045-R1)	GL31045-R1	MET1	Metabolism of cofactors and vitamins: Porphyrin and chlorophyll metabolism	0	0	1000	0		2.1.1.107
GL0767	protoheme IX farnesyltransferase	heme[c] + h2o[c] + fpp[c] -> hemeo[c] + ppi[c]	(GL29011-R1)	GL29011-R1	COX10	Metabolism of cofactors and vitamins: Porphyrin and chlorophyll metabolism	0	0	1000	0		2.5.1.-
GL0768	cytochrome c oxidase assembly protein subunit 15	h2o[c] + hemeo[c] -> 4 h[c] + hemea[c]	(GL26573-R1)	GL26573-R1	COX15	Metabolism of cofactors and vitamins: Porphyrin and chlorophyll metabolism	0	0	1000	0
GL0769	cytochrome c heme-lyase	apoce[m] + heme[m] + 2 h[m] -> cytc[m]	(GL27321-R1)	GL27321-R1		Metabolism of cofactors and vitamins: Porphyrin and chlorophyll metabolism	0	0	1000	0		4.4.1.17
GL0770	frataxin	4 h[c] + o2[c] + 4 fe2[c] -> 2 h2o[c] + 4 fe3[c]	(GL29675-R1)	GL29675-R1	FXN	Metabolism of cofactors and vitamins: Porphyrin and chlorophyll metabolism	0	0	1000	0		1.16.3.1
GL0771	4-hydroxybenzoate polyprenyltransferase	alka[c] + 4hba[c] -> ppi[c] + hex4hyb[c] + h[c]	(GL31174-R1) or (GL15698-R1)	GL31174-R1 GL15698-R1	(COQ2.1 or COQ2.2)	Metabolism of cofactors and vitamins: Ubiquinone and other terpenoid-quinone biosynthesis	0	0	1000	0		2.5.1.39
GL0772	hexaprenyl-diphosphate synthase	ggpp[c] + 2 ippp[c] + h[c] -> 2 ppi[c] + alka[c]	(GL29478-R1)	GL29478-R1	COQ1	Metabolism of cofactors and vitamins: Ubiquinone and other terpenoid-quinone biosynthesis	0	0	1000	0		2.5.1.82
GL0773	3-demethylubiquinone-9 3-methyltransferase	sam[m] + hmhmb[m] -> h[m] + q6[m] + sah[m]	(GL21867-R1)	GL21867-R1	UBIG	Metabolism of cofactors and vitamins: Ubiquinone and other terpenoid-quinone biosynthesis	0	0	1000	0		2.1.1.64
GL0774	spontaneous reaction	o2[m] + 2 hex4hyb[m] -> 2 3dh5hpb[m]				Metabolism of cofactors and vitamins: Ubiquinone and other terpenoid-quinone biosynthesis	0	0	1000	0
GL0775	dihydroxyhexaprenylbenzoate methyltransferase	sam[m] + 3dh5hpb[m] -> h[m] + sah[m] + hhm[m]				Metabolism of cofactors and vitamins: Ubiquinone and other terpenoid-quinone biosynthesis	0	0	1000	0		2.1.1.114
GL0776	spontaneous reaction	h[m] + hhm[m] -> co2[m] + hm[m]				Metabolism of cofactors and vitamins: Ubiquinone and other terpenoid-quinone biosynthesis	0	0	1000	0
GL0777	ubiquinone biosynthesis monooxygenase Coq6	o2[m] + hm[m] -> h2o[m] + hmb[m]	(GL21960-R1)	GL21960-R1	COQ6	Metabolism of cofactors and vitamins: Ubiquinone and other terpenoid-quinone biosynthesis	0	0	1000	0		1.14.13.-
GL0778	ubiquinone biosynthesis methyltransferase	sam[m] + hmb[m] -> h[m] + sah[m] + hmmb[m]	(GL23586-R1)	GL23586-R1	COQ5	Metabolism of cofactors and vitamins: Ubiquinone and other terpenoid-quinone biosynthesis	0	0	1000	0		2.1.1.201
GL0779	ubiquinone biosynthesis monooxygenase Coq7	nadph[m] + h[m] + o2[m] + hmmb[m] -> nadp[m] + h2o[m] + hmhmb[m]	(GL20748-R1)	GL20748-R1	COQ7	Metabolism of cofactors and vitamins: Ubiquinone and other terpenoid-quinone biosynthesis	0	0	1000	0		1.14.13.-
GL0780	chorismate pyruvate-lyase (4-hydroxybenzoate-forming)	chor[c] -> pyr[c] + 4hba[c]				Metabolism of cofactors and vitamins: Ubiquinone and other terpenoid-quinone biosynthesis	0	0	1000	0		4.1.3.40
GL0781	glycerol-3-phosphate dehydrogenase (NAD+)	t3p2[c] + nadh[c] + h[c] -> gl3p[c] + nad[c]	(GL29426-R1)	GL29426-R1	GPD1	Lipid metabolism: Glycerophospholipid metabolism	0	0	1000	0		1.1.1.8
GL0782	glycerol-3-phosphate dehydrogenase	fad[c] + gl3p[c] -> t3p2[c] + fadh2[c]	(GL23923-R1)	GL23923-R1	GLPA	Lipid metabolism: Glycerophospholipid metabolism	0	0	1000	0		1.1.5.3
GL0783	glyceronephosphate O-acyltransferase	0.158 c160coa[c] + 0.064 c180coa[c] + 0.0118 c200coa[c] + 0.034 c220coa[c] + 0.311 c181coa[c] + 0.101 c182coa[c] + 0.1062 c183coa[c] + 0.007 c202coa[c] + 0.00452 c140coa[c] + 0.02283 c161coa[c] + 0.00117 c162coa[c] + 0.00195 c203coa[c] + 0.00319 c240coa[c] + t3p2[c] + h[c] -> at3p2[c]	(GL22206-R1) or (GL17541-R1)	GL22206-R1 GL17541-R1	(GNPAT1 or GNPAT2)	Lipid metabolism: Glycerophospholipid metabolism	0	0	1000	0		2.3.1.42
GL0784	1-acylglycerone phosphate reductase	4 h[c] + nadph[c] + at3p2[c] -> nadp[c] + agl3p[c]	(GL29313-R1) or (GL23120-R1) or (GL30723-R1)	GL29313-R1 GL23120-R1 GL30723-R1	(AYR1.1 or AYR1.2 or AYR1.3)	Lipid metabolism: Glycerophospholipid metabolism	0	0	1000	0		1.1.1.101
GL0785	glycerol-3-phosphate O-acyltransferase	gl3p[c] + 0.158 c160coa[c] + 0.064 c180coa[c] + 0.0118 c200coa[c] + 0.034 c220coa[c] + 0.311 c181coa[c] + 0.101 c182coa[c] + 0.1062 c183coa[c] + 0.007 c202coa[c] + 0.00452 c140coa[c] + 0.02283 c161coa[c] + 0.00117 c162coa[c] + 0.00195 c203coa[c] + 0.00319 c240coa[c] -> agl3p[c] + coa[c]	(GL22206-R1) or (GL17541-R1)	GL22206-R1 GL17541-R1	(GNPAT1 or GNPAT2)	Lipid metabolism: Glycerophospholipid metabolism	0	0	1000	0		2.3.1.15
GL0786	lysophosphatidate acyltransferase	agl3p[c] + 0.158 c160coa[c] + 0.064 c180coa[c] + 0.0118 c200coa[c] + 0.034 c220coa[c] + 0.311 c181coa[c] + 0.101 c182coa[c] + 0.1062 c183coa[c] + 0.007 c202coa[c] + 0.00452 c140coa[c] + 0.02283 c161coa[c] + 0.00117 c162coa[c] + 0.00195 c203coa[c] + 0.00319 c240coa[c] -> pa[c] + coa[c]	(GL26728-R1)	GL26728-R1	LPT1	Lipid metabolism: Glycerophospholipid metabolism	0	0	1000	0		2.3.1.51
GL0787	phospholipase D1/2	pc[c] + h2o[c] -> pa[c] + cln[c]	(GL22110-R1) or (GL23571-R1)	GL22110-R1 GL23571-R1	PLD1.1 or PLD1.2)(	Lipid metabolism: Glycerophospholipid metabolism	0	0	1000	0		3.1.4.4
GL0788	phospholipase D1/2	pe[c] + h2o[c] -> ethla[c] + pa[c] + h[c]	(GL22110-R1) or (GL23571-R1)	GL22110-R1 GL23571-R1	PLD1.1 or PLD1.2)(	Lipid metabolism: Glycerophospholipid metabolism	0	0	1000	0		3.1.4.4
GL0789	diacylglycerol kinase (CTP)	ctp[c] + dagly[c] + 2 h[c] -> cdp[c] + pa[c]	(GL20888-R1)	GL20888-R1	DGK1	Lipid metabolism: Glycerophospholipid metabolism	0	0	1000	0		2.7.1.174
GL0790	phosphatidate phosphatase/diacylglycerol diphosphate phosphatase	pa[c] + h2o[c] -> dagly[c] + pi[c] + 3 h[c]	(GL31188-R1) or (GL24833-R1)	GL31188-R1 GL24833-R1	(LPIN or DPP1)	Lipid metabolism: Glycerophospholipid metabolism	0	0	1000	0		3.1.3.4 3.1.3.81
GL0791	lysophospholipid acyltransferase	lpe[c] + acylcoa[c] -> pe[c] + coa[c]	(GL26728-R1)	GL26728-R1	LPEAT	Lipid metabolism: Glycerophospholipid metabolism	0	0	1000	0
GL0792	lysophospholipid acyltransferase	2 h[c] + 0.158 c160coa[c] + 0.064 c180coa[c] + 0.0118 c200coa[c] + 0.034 c220coa[c] + 0.311 c181coa[c] + 0.101 c182coa[c] + 0.1062 c183coa[c] + 0.007 c202coa[c] + 0.00452 c140coa[c] + 0.02283 c161coa[c] + 0.00117 c162coa[c] + 0.00195 c203coa[c] + 0.00319 c240coa[c] + acglpe[c] <=> coa[c] + ps[c]	(GL26728-R1)	GL26728-R1	LPSAT	Lipid metabolism: Glycerophospholipid metabolism	1	-1000	1000	0
GL0793	lysophospholipid acyltransferase	acylcoa[c] + agpi[c] + h[c] <=> coa[c] + pins[c]	(GL26728-R1)	GL26728-R1	LPIAT	Lipid metabolism: Glycerophospholipid metabolism	1	-1000	1000	0
GL0794	lysophospholipid acyltransferase	acylcoa[c] + mlcl[c] <=> coa[c] + cl[c]	(GL26728-R1)	GL26728-R1	LCLAT	Lipid metabolism: Glycerophospholipid metabolism	1	-1000	1000	0
GL0795	lysophospholipid acyltransferase	acylcoa[c] + acglpo[c] <=> coa[c] + pg[c] + h[c]	(GL26728-R1)	GL26728-R1	LPGAT	Lipid metabolism: Glycerophospholipid metabolism	1	-1000	1000	0		2.3.1.-
GL0796	phospholipase A2	h[c] + h2o[c] + pe[c] -> 0.158 c160[c] + 0.064 c180[c] + 0.0118 c200[c] + 0.034 c220[c] + 0.311 c181[c] + 0.101 c182[c] + 0.1062 c183[c] + 0.007 c202[c] + 0.00452 c140[c] + 0.02283 c161[c] + 0.00117 c162[c] + 0.00195 c203[c] + 0.00319 c240[c] + lpe[c]	(GL24737-R1)	GL24737-R1	PLA2G	Lipid metabolism: Glycerophospholipid metabolism	0	0	1000	0		3.1.1.4
GL0797	Phosphatidylcholine 2-acylhydrolase	h[c] + h2o[c] + pc[c] -> 0.158 c160[c] + 0.064 c180[c] + 0.0118 c200[c] + 0.034 c220[c] + 0.311 c181[c] + 0.101 c182[c] + 0.1062 c183[c] + 0.007 c202[c] + 0.00452 c140[c] + 0.02283 c161[c] + 0.00117 c162[c] + 0.00195 c203[c] + 0.00319 c240[c] + lpc[c]	(GL24737-R1)	GL24737-R1	PLA2G	Lipid metabolism: Glycerophospholipid metabolism	0	0	1000	0		3.1.1.4
GL0798	lysophospholipid hydrolase	lpe[c] + h2o[c] -> carbo[c] + glypeln[c]	(GL21376-R1) or (GL20722-R1)	GL21376-R1 GL20722-R1	(PLB1 or PLB2)	Lipid metabolism: Glycerophospholipid metabolism	0	0	1000	0		3.1.1.5
GL0799	lysophospholipid hydrolase	lpc[c] + h2o[c] -> carbo[c] + glypcln[c]	(GL30083-R1)	GL30083-R1	NTE	Lipid metabolism: Glycerophospholipid metabolism	0	0	1000	0		3.1.1.5
GL0800	methylene-fatty-acyl-phospholipid synthase	sam[c] + pndm[c] -> sah[c] + pc[c] + h[c]	(GL22508-R1)	GL22508-R1	OPI3	Lipid metabolism: Glycerophospholipid metabolism	0	0	1000	0		2.1.1.16
GL0801	methylene-fatty-acyl-phospholipid synthase	sam[c] + pcpmme[c] -> sah[c] + pndm[c] + h[c]	(GL22508-R1)	GL22508-R1	OPI3	Lipid metabolism: Glycerophospholipid metabolism	0	0	1000	0		2.1.1.16
GL0802	phosphatidylethanolamine N-methyltransferase	sam[c] + pe[c] -> sah[c] + pcpmme[c] + h[c]	(GL21392-R1)	GL21392-R1	CHO2	Lipid metabolism: Glycerophospholipid metabolism	0	0	1000	0		2.1.1.17
GL0803	choline-phosphate cytidylyltransferase	ctp[c] + pcln[c] -> ppi[c] + cdpcln[c]	(GL18582-R1)	GL18582-R1	PCYT1	Lipid metabolism: Glycerophospholipid metabolism	0	0	1000	0		2.7.7.15
GL0804	choline kinase	atp[c] + cln[c] -> adp[c] + pcln[c] + h[c]	(GL29666-R1)	GL29666-R1	CKI1	Lipid metabolism: Glycerophospholipid metabolism	0	0	1000	0		2.7.1.32
GL0805	betaine lipid synthase	dagly[c] + sam[c] -> dghs[c] + 5mta[c]	(GL16153-R1)	GL16153-R1	BTA1	Lipid metabolism: Glycerophospholipid metabolism	0	0	1000	0
GL0806	betaine lipid synthase	dghs[c] + 3 sam[c] -> dgts[c] + 3 sah[c] + 3 h[c]	(GL16153-R1)	GL16153-R1	BTA1	Lipid metabolism: Glycerophospholipid metabolism	0	0	1000	0
GL0807	ethanolaminephosphotransferase	cdpea[c] + dagly[c] + 2 h[c] -> cmp[c] + pe[c]	(GL29534-R1)	GL29534-R1	EPT1	Lipid metabolism: Glycerophospholipid metabolism	0	0	1000	0		2.7.8.1
GL0808	ethanolamine-phosphate cytidylyltransferase	pen[c] + ctp[c] + h[c] -> ppi[c] + cdpea[c]				Lipid metabolism: Glycerophospholipid metabolism	0	0	1000	0		2.7.7.14
GL0809	phosphatidylserine decarboxylase	ps[m] + h[m] -> pe[m] + co2[m]	(GL25501-R1) or (GL22720-R1) or (GL30171-R1)	GL25501-R1 GL22720-R1 GL30171-R1	(PISD2.1 or PISD2.2 or PISD2.3)	Lipid metabolism: Glycerophospholipid metabolism	0	0	1000	0		4.1.1.65
GL0810	phosphatidylserine decarboxylase	ps[c] + h[c] -> pe[c] + co2[c]	(GL22720-R1)	GL22720-R1	PISD1	Lipid metabolism: Glycerophospholipid metabolism	0	0	1000	0		4.1.1.65
GL0811	phosphatidylserine synthase 2	ps[c] + ethla[c] <=> pe[c] + ser[c]	(GL23630-R1)	GL23630-R1	PTDSS2	Lipid metabolism: Glycerophospholipid metabolism	1	-1000	1000	0		2.7.8.29
GL0812	CDP-diacylglycerol---serine O-phosphatidyltransferase	cdpdg[c] + ser[c] <=> cmp[c] + ps[c] + h[c]	(GL24671-R1)	GL24671-R1	CHO1	Lipid metabolism: Glycerophospholipid metabolism	1	-1000	1000	0		2.7.8.8
GL0813	phosphatidate cytidylyltransferase	ctp[c] + pa[c] <=> ppi[c] + cdpdg[c] + h[c]	(GL25298-R1)	GL25298-R1	CDS1	Lipid metabolism: Glycerophospholipid metabolism	1	-1000	1000	0		2.7.7.41
GL0814	CDP-diacylglycerol--inositol 3-phosphatidyltransferase	cdpdg[c] + ins[c] <=> cmp[c] + pins[c]	(GL24678-R1)	GL24678-R1	CDIPT	Lipid metabolism: Glycerophospholipid metabolism	1	-1000	1000	0		2.7.8.11
GL0815	CDP-diacylglycerol--glycerol-3-phosphate 3-phosphatidyltransferase	cdpdg[m] + gl3p[m] -> cmp[m] + pgp[m] + h[m]	(GL24487-R1)	GL24487-R1	PGS1	Lipid metabolism: Glycerophospholipid metabolism	0	0	1000	0		2.7.8.5
GL0816	phosphatidylglycerophosphatase GEP4	pgp[m] + h2o[m] -> pg[m] + pi[m]	(GL16974-R1)	GL16974-R1	GEP4	Lipid metabolism: Glycerophospholipid metabolism	0	0	1000	0		3.1.3.27
GL0817	cardiolipin synthase	pg[m] + cdpdg[m] -> cl[m] + cmp[m] + h[m]	(GL21682-R1)	GL21682-R1	CRLS	Lipid metabolism: Glycerophospholipid metabolism	0	0	1000	0		2.7.8.-
GL0818	cardiolipin synthase	2 pg[m] -> cl[m] + gl[m]	(GL21682-R1)	GL21682-R1	CRLS	Lipid metabolism: Glycerophospholipid metabolism	0	0	1000	0		2.7.8.-
GL0819	Phospholipid-translocating ATPase	h2o[m] + atp[m] + pg[m] -> h[c] + pi[m] + adp[m] + pg[c]				Lipid Metabolism	0	0	1000	0		3.6.3.1
GL0820	cardiolipin-specific phospholipase	cl[c] + h2o[c] -> mlcl[c] + carbo[c] + h[c]	(GL20408-R1)	GL20408-R1	CLD1	Lipid metabolism: Glycerophospholipid metabolism	0	0	1000	0		3.1.1.-
GL0821	phosphatidylglycerol phospholipase C	pg[c] + h2o[c] -> dagly[c] + gl3p[c]	(GL31144-R1)	GL31144-R1	PGC1	Lipid metabolism: Glycerophospholipid metabolism	0	0	1000	0		3.1.4.-
GL0822	glycerophosphoryl diester phosphodiesterase	h2o[c] + glypeln[c] -> gl3p[c] + ethla[c] + h[c]	(GL31514-R1)	GL31514-R1	GPDP	Lipid metabolism: Glycerophospholipid metabolism	0	0	1000	0		3.1.4.46
GL0823	glycerophosphoryl diester phosphodiesterase	h2o[c] + glypcln[c] -> gl3p[c] + cln[c]	(GL31514-R1)	GL31514-R1	GPDP	Lipid metabolism: Glycerophospholipid metabolism	0	0	1000	0		3.1.4.46
GL0824	Glycerol dehydrogenase	nad[c] + gl[c] -> h[c] + nadh[c] + glyn[c]	(GL25059-R1) or (GL28729-R1)	GL25059-R1 GL28729-R1	(GLDA1.1 or GLDA1.2)	Lipid metabolism: Glycerophospholipid metabolism	0	0	1000	0		1.1.1.6
GL0825	glycerol 2-dehydrogenase (NADP+)	gl[c] + nadp[c] -> glyn[c] + nadph[c] + h[c]	(GL22317-R1)	GL22317-R1	GCY1	Lipid metabolism: Glycerolipid metabolism	0	0	1000	0		1.1.1.156
GL0826	D-Glyceraldehyde:NAD+ oxidoreductase	glyal[c] + nad[c] + h2o[c] <=> g[c] + nadh[c] + 2 h[c]	(GL30174-R1) or (GL24130-R1)	GL30174-R1 GL24130-R1	(ALD1.1 or ALD1.2)	Lipid metabolism: Glycerolipid metabolism	1	-1000	1000	0		1.2.1.3
GL0827	D-Glyceraldehyde:NAD+ oxidoreductase	glyal[m] + nad[m] + h2o[m] <=> g[m] + nadh[m] + 2 h[m]	(GL26572-R1) or (GL18415-R1) or (GL27033-R1)	GL26572-R1 GL18415-R1 GL27033-R1	(ALD1.3 or ALD1.4 or ALD1.5)	Lipid metabolism: Glycerolipid metabolism	1	-1000	1000	0		1.2.1.3
GL0828	glycerol:NADP+ oxidoreductase	gl[c] + nadp[c] <=> glyal[c] + nadph[c] + h[c]	(GL25699-R1)	GL25699-R1	ADH2	Lipid metabolism: Glycerolipid metabolism	1	-1000	1000	0		1.1.1.2
GL0829	glycerol 3-phosphatase 1	gl3p[c] + h2o[c] -> gl[c] + pi[c]	(GL26511-R1)	GL26511-R1	GPP1	Lipid metabolism: Glycerolipid metabolism	0	0	1000	0		3.1.3.21
GL0830	glycerol kinase	atp[c] + gl[c] -> adp[c] + gl3p[c] + h[c]	(GL27363-R1)	GL27363-R1	GK	Lipid metabolism: Glycerolipid metabolism	0	0	1000	0		2.7.1.30
GL0831	triacylglycerol lipase	dagly[c] + 0.158 c160coa[c] + 0.064 c180coa[c] + 0.0118 c200coa[c] + 0.034 c220coa[c] + 0.311 c181coa[c] + 0.101 c182coa[c] + 0.1062 c183coa[c] + 0.007 c202coa[c] + 0.00452 c140coa[c] + 0.02283 c161coa[c] + 0.00117 c162coa[c] + 0.00195 c203coa[c] + 0.00319 c240coa[c] -> tagly[c] + coa[c]	(GL21632-R1)	GL21632-R1		Lipid metabolism: Glycerolipid metabolism	0	0	1000	0		2.3.1.20
GL0832	triacylglycerol lipase	h2o[c] + tagly[c] -> h[c] + dagly[c] + 0.158 c160[c] + 0.064 c180[c] + 0.0118 c200[c] + 0.034 c220[c] + 0.311 c181[c] + 0.101 c182[c] + 0.1062 c183[c] + 0.007 c202[c] + 0.00452 c140[c] + 0.02283 c161[c] + 0.00117 c162[c] + 0.00195 c203[c] + 0.00319 c240[c]	(GL30614-R1 and GL24371-R1) or (GL20230-R1 and GL24704-R1 and GL22854-R1)	GL30614-R1 GL24371-R1 GL20230-R1 GL24704-R1 GL22854-R1	((ATG1 and ATG2) or (ATG15.1 and ATG15.2 and ATG15.3))	Lipid metabolism: Glycerolipid metabolism	0	0	1000	0		3.1.1.3
GL0833	diacylglycerol lipase	h[c] + h2o[c] + dagly[c] -> magly[c] + 0.158 c160[c] + 0.064 c180[c] + 0.0118 c200[c] + 0.034 c220[c] + 0.311 c181[c] + 0.101 c182[c] + 0.1062 c183[c] + 0.007 c202[c] + 0.00452 c140[c] + 0.02283 c161[c] + 0.00117 c162[c] + 0.00195 c203[c] + 0.00319 c240[c]	(GL30614-R1 and GL24371-R1) or (GL20230-R1 and GL24704-R1 and GL22854-R1)	GL30614-R1 GL24371-R1 GL20230-R1 GL24704-R1 GL22854-R1	((ATG1 and ATG2) or (ATG15.1 and ATG15.2 and ATG15.3))	Lipid metabolism: Glycerolipid metabolism	0	0	1000	0		3.1.1.3
GL0834	Acylglycerol lipase	h2o[c] + magly[c] -> gl[c] + 0.158 c160[c] + 0.064 c180[c] + 0.0118 c200[c] + 0.034 c220[c] + 0.311 c181[c] + 0.101 c182[c] + 0.1062 c183[c] + 0.007 c202[c] + 0.00452 c140[c] + 0.02283 c161[c] + 0.00117 c162[c] + 0.00195 c203[c] + 0.00319 c240[c]	(GL23911-R1)	GL23911-R1	ACGL	Lipid metabolism: Glycerolipid metabolism	0	0	1000	0		3.1.1.23
GL0835	phospholipid:diacylglycerol acyltransferase	dagly[c] + pc[c] -> tagly[c] + lpc[c]	(GL25371-R1)	GL25371-R1	PPDG	Lipid metabolism: Glycerolipid metabolism	0	0	1000	0		2.3.1.158
GL0836	phospholipid:diacylglycerol acyltransferase	dagly[c] + pe[c] -> tagly[c] + lpe[c]	(GL25371-R1)	GL25371-R1	PPDG	Lipid metabolism: Glycerolipid metabolism	0	0	1000	0		2.3.1.158
GL0837	phospholipid:diacylglycerol acyltransferase	dagly[c] + pg[c] -> tagly[c] + lpg[c]	(GL25371-R1)	GL25371-R1	PPDG	Lipid metabolism: Glycerolipid metabolism	0	0	1000	0		2.3.1.158
GL0838	phospholipid:diacylglycerol acyltransferase	dagly[c] + ps[c] -> tagly[c] + lps[c]	(GL25371-R1)	GL25371-R1	PPDG	Lipid metabolism: Glycerolipid metabolism	0	0	1000	0		2.3.1.158
GL0839	Acyl-[coa] formatio	0.158 c160coa[c] + 0.064 c180coa[c] + 0.0118 c200coa[c] + 0.034 c220coa[c] + 0.311 c181coa[c] + 0.101 c182coa[c] + 0.1062 c183coa[c] + 0.007 c202coa[c] + 0.00452 c140coa[c] + 0.02283 c161coa[c] + 0.00117 c162coa[c] + 0.00195 c203coa[c] + 0.00319 c240coa[c] -> acylcoa[c]				Lipid metabolism: Glycerolipid metabolism	0	0	1000	0
GL0840	ethanolamine kinase	atp[c] + ethla[c] -> h[c] + adp[c] + pen[c]				Lipid metabolism: Glycerolipid metabolism	0	0	1000	0		2.7.1.82
GL0841	lysophosphatidylcholine acyltransferase	lpc[c] + 0.158 c160coa[c] + 0.064 c180coa[c] + 0.0118 c200coa[c] + 0.034 c220coa[c] + 0.311 c181coa[c] + 0.101 c182coa[c] + 0.1062 c183coa[c] + 0.007 c202coa[c] + 0.00452 c140coa[c] + 0.02283 c161coa[c] + 0.00117 c162coa[c] + 0.00195 c203coa[c] + 0.00319 c240coa[c] -> coa[c] + pc[c] + 2 h[c]				Lipid metabolism: Glycerolipid metabolism	0	0	1000	0		2.3.1.23	KAAS	R01318
GL0842	farnesyl-diphosphate farnesyltransferase	2 fpp[c] -> ppi[c] + pspp[c]	(GL21690-R1)	GL21690-R1	FDFT1	Lipid metabolism: Steroid biosynthesis	0	0	1000	0		2.5.1.21
GL0843	farnesyl-diphosphate farnesyltransferase	pspp[c] + nadph[c] + h[c] -> ppi[c] + sql[c] + nadp[c]	(GL21690-R1)	GL21690-R1	FDFT1	Lipid metabolism: Steroid biosynthesis	0	0	1000	0		2.5.1.21
GL0844	squalene monooxygenase	sql[c] + nadph[c] + o2[c] + h[c] -> s23e[c] + nadp[c] + h2o[c]	(GL23376-R1)	GL23376-R1	SQLE	Lipid metabolism: Steroid biosynthesis	0	0	1000	0		1.14.14.17
GL0845	lanosterol synthase	s23e[c] -> lnst[c]	(GL18675-R1)	GL18675-R1	LSS	Lipid metabolism: Steroid biosynthesis	0	0	1000	0		5.4.99.7
GL0846	Lanosterol,NADPH:oxygen oxidoreductase (14-methyl cleaving)	lnst[c] + 3 o2[c] + 3 nadph[c] + 2 h[c] -> dctol[c] + for[c] + 3 nadp[c] + 4 h2o[c]	(GL22375-R1) or (GL26139-R1)	GL22375-R1 GL26139-R1	(CYP51.1 or CYP15.2)	Lipid metabolism: Steroid biosynthesis	0	0	1000	0		1.14.13.70
GL0847	sterol,NADPH:oxygen oxidoreductase (14-methyl cleaving)	obl[c] + 3 o2[c] + 3 nadph[c] + 2 h[c] -> amt3bol[c] + for[c] + 3 nadp[c] + 4 h2o[c]	(GL22375-R1) or (GL26139-R1)	GL22375-R1 GL26139-R1	(CYP51.1 or CYP15.2)	Lipid metabolism: Steroid biosynthesis	0	0	1000	0		1.14.13.70
GL0848	4,4-dimethyl-5a-cholesta-8,24-dien-3b-ol:NADP+ D14-oxidoreductase	dctol[c] + nadph[c] + h[c] -> dcdol[c] + nadp[c]	(GL23832-R1)	GL23832-R1	ERG24	Lipid metabolism: Steroid biosynthesis	0	0	1000	0		1.3.1.70
GL0849	elta14-sterol reductase	amt3bol[c] + nadph[c] + h[c] -> mefol[c] + nadp[c]	(GL23832-R1)	GL23832-R1	ERG24	Lipid metabolism: Steroid biosynthesis	0	0	1000	0		1.3.1.70
GL0850	methylsterol monooxygenase	dcdol[c] + 3 nadph[c] + 2 h[c] + 3 o2[c] -> dcda[c] + 3 nadp[c] + 4 h2o[c]	(GL23074-R1)	GL23074-R1	ERG25	Lipid metabolism: Steroid biosynthesis	0	0	1000	0		1.14.13.72
GL0851	sterol-4alpha-carboxylate 3-dehydrogenase (decarboxylating)	dcda[c] + nadp[c] -> cdol[c] + nadph[c] + co2[c]	(GL16838-R1)	GL16838-R1	ERG26	Lipid metabolism: Steroid biosynthesis	0	0	1000	0		1.1.1.170
GL0852	3-keto steroid reductase	cdol[c] + nadph[c] + h[c] -> mzymst[c] + nadp[c]	(GL22371-R1)	GL22371-R1	ERG27	Lipid metabolism: Steroid biosynthesis	0	0	1000	0		1.1.1.270
GL0853	spontaneous reaction	mzymst[c] <=> zymst[c]				Lipid metabolism: Steroid biosynthesis	1	-1000	1000	0
GL0854	sterol 24-C-methyltransferase	sam[c] + zymst[c] -> sah[c] + epst[c] + h[c]	(GL18323-R1)	GL18323-R1	ERG6	Lipid metabolism: Steroid biosynthesis	0	0	1000	0		2.1.1.41
GL0855	sterol 24-C-methyltransferase	cycl[c] + sam[c] -> mecynol[c] + sah[c] + h[c]	(GL18323-R1)	GL18323-R1	ERG6	Lipid metabolism: Steroid biosynthesis	0	0	1000	0		2.1.1.41
GL0856	lathosterol oxidase	epst[c] + nadph[c] + o2[c] + h[c] -> ertrol[c] + nadp[c] + 2 h2o[c]	(GL26052-R1)	GL26052-R1	ERG3	Lipid metabolism: Steroid biosynthesis	0	0	1000	0		1.14.19.20
GL0857	lathosterol oxidase	last[c] + nadh[c] + h[c] + o2[c] -> pvd3[c] + nad[c] + 2 h2o[c]	(GL26052-R1)	GL26052-R1	ERG3	Lipid metabolism: Steroid biosynthesis	0	0	1000	0		1.14.19.20
GL0858	lathosterol oxidase	last[c] + nadph[c] + h[c] + o2[c] -> pvd3[c] + nadp[c] + 2 h2o[c]	(GL26052-R1)	GL26052-R1	ERG3	Lipid metabolism: Steroid biosynthesis	0	0	1000	0		1.14.19.20
GL0859	lathosterol oxidase	7dhast[c] + 2 foch[c] + o2[c] + 4 h[c] -> 5dhast[c] + 2 fich[c] + 2 h2o[c]	(GL26052-R1)	GL26052-R1	ERG3	Lipid metabolism: Steroid biosynthesis	0	0	1000	0		1.14.19.20
GL0860	lathosterol oxidase	epst[c] + 2 foch[c] + o2[c] + 2 h[c] -> dhrol[c] + 2 fich[c] + 2 h2o[c]	(GL26052-R1)	GL26052-R1	ERG3	Lipid metabolism: Steroid biosynthesis	0	0	1000	0		1.14.19.20
GL0861	C-22 sterol desaturase	ertrol[c] + nadph[c] + o2[c] + h[c] -> erteol[c] + nadp[c] + 2 h2o[c]	(GL30444-R1)	GL30444-R1	ERG5	Lipid metabolism: Steroid biosynthesis	0	0	1000	0		1.14.14.-
GL0862	delta24(24-1)-sterol reductase	erteol[c] + nadph[c] + h[c] -> ergost[c] + nadp[c]	(GL21870-R1)	GL21870-R1	ERG4	Lipid metabolism: Steroid biosynthesis	0	0	1000	0		1.3.1.71
GL0863	Ultraviolet light (UV)	ergost[c] -> vd2[c]				Lipid metabolism: Steroid biosynthesis	0	0	1000	0
GL0864	Ultraviolet light (UV)	pvd3[c] -> vd3[c]				Lipid metabolism: Steroid biosynthesis	0	0	1000	0
GL0865	lysosomal acid lipase/cholesteryl ester hydrolase	h2o[c] + chlestr[c] -> h[c] + carbo[c] + chtrol[c]	(GL30230-R1)	GL30230-R1	LIPA	Lipid metabolism: Steroid biosynthesis	0	0	1000	0		3.1.1.13
GL0866	sterol O-acyltransferase	acylcoa[c] + chtrol[c] <=> coa[c] + chlestr[c]	(GL21829-R1)	GL21829-R1	SOAT	Lipid metabolism: Steroid biosynthesis	1	-1000	1000	0		2.3.1.26
GL0867	delta24-sterol reductase	h[c] + nadph[c] + zymst[c] -> nadp[c] + ac8bol[c]				Lipid metabolism: Steroid biosynthesis	0	0	1000	0		1.3.1.72
GL0868	cholestenol Delta-isomerase	ac8bol[c] -> last[c]				Lipid metabolism: Steroid biosynthesis	0	0	1000	0		5.3.3.5
GL0869	7-dehydrocholesterol reductase	h[c] + nadh[c] + pvd3[c] -> nad[c] + chtrol[c]				Lipid metabolism: Steroid biosynthesis	0	0	1000	0		1.3.1.21
GL0870	7-dehydrocholesterol reductase	h[c] + nadph[c] + pvd3[c] -> nadp[c] + chtrol[c]				Lipid metabolism: Steroid biosynthesis	0	0	1000	0		1.3.1.21
GL0871	serine palmitoyltransferase	c160coa[c] + ser[c] + h[c] -> dhsph[c] + coa[c] + co2[c]	(GL21000-R1) or (GL20589-R1)	GL21000-R1 GL20589-R1	(SPT1.2 or SPT1.1)	Lipid metabolism: Sphingolipid metabolism	0	0	1000	0		2.3.1.50
GL0872	3-dehydrosphinganine reductase	dhsph[c] + nadph[c] + h[c] -> sph[c] + nadp[c]	(GL25388-R1)	GL25388-R1		Lipid metabolism: Sphingolipid metabolism	0	0	1000	0		1.1.1.102
GL0873	sphingosine kinase	atp[c] + sph[c] -> adp[c] + dhsp[c] + h[c]	(GL17336-R1)	GL17336-R1	SPHK	Lipid metabolism: Sphingolipid metabolism	0	0	1000	0		2.7.1.91
GL0874	sphingosine kinase	sph[c] + atp[c] -> sph1p[c] + adp[c] + 3 h[c]	(GL17336-R1)	GL17336-R1	SPHK	Lipid metabolism: Sphingolipid metabolism	0	0	1000	0		2.7.1.91
GL0875	sphinganine-1-phosphate aldolase	dhsp[c] -> pen[c] + c16a[c]	(GL25157-R2) or (GL25157-R1)	GL25157-R2 GL25157-R1	(SGPL1.1 or SGPL1.2)	Lipid metabolism: Sphingolipid metabolism	0	0	1000	0		4.1.2.27
GL0876	sphinganine-1-phosphate aldolase	sph1p[c] -> pen[c] + c16e[c]	(GL25157-R2) or (GL25157-R1)	GL25157-R2 GL25157-R1	(SGPL1.1 or SGPL1.2)	Lipid metabolism: Sphingolipid metabolism	0	0	1000	0		4.1.2.27
GL0877	neutral ceramidase	cer[c] + h2o[c] -> carbo[c] + sphe[c] + 2 h[c]	(GL16966-R1)	GL16966-R1	ASAH2	Lipid metabolism: Sphingolipid metabolism	0	0	1000	0		3.5.1.23
GL0878	sphinganine C4-monooxygenase	sph[c] + nadph[c] + h[c] + o2[c] -> psph[c] + nadp[c] + h2o[c]	(GL21718-R1)	GL21718-R1	SUR2	Lipid metabolism: Sphingolipid metabolism	0	0	1000	0		1.14.18.5
GL0879	sphinganine C4-monooxygenase	dcer2[c] + nadph[c] + h[c] + o2[c] -> pcer2[c] + nadp[c] + h2o[c]	(GL21718-R1)	GL21718-R1	SUR2	Lipid metabolism: Sphingolipid metabolism	0	0	1000	0		1.14.18.5
GL0880	Acyl-CoA-dependent ceramide synthase	acylcoa[c] + sph[c] + h[c] -> coa[c] + dcer2[c]	(GL31296-R1) or (GL31296-R2) or (GL31295-R1) or (GL31295-R2) or (GL26740-R1)	GL31296-R1 GL31296-R2 GL31295-R1 GL31295-R2 GL26740-R1	(LAG1.1 or LAG1.2 or LAG1.3 or LAG1.4 or LAG1.4)	Lipid Metabolism: Sphingolipid metabolism	0	0	1000	0		2.3.1.24
GL0881	Acyl-CoA-dependent ceramide synthase	dcer2[c] + h2o[c] -> acylcoa[c] + sph[c] + co2[c]	(GL31296-R1) or (GL31296-R2) or (GL31295-R1) or (GL31295-R2) or (GL26740-R1)	GL31296-R1 GL31296-R2 GL31295-R1 GL31295-R2 GL26740-R1	(LAG1.1 or LAG1.2 or LAG1.3 or LAG1.4 or LAG1.5)	Lipid metabolism: Sphingolipid metabolism	0	0	1000	0		2.3.1.24
GL0882	Acyl-CoA-dependent ceramide synthase	acylcoa[c] + psph[c] + h[c] -> coa[c] + pcer2[c]	(GL31296-R1) or (GL31296-R2) or (GL31295-R1) or (GL31295-R2) or (GL26740-R1)	GL31296-R1 GL31296-R2 GL31295-R1 GL31295-R2 GL26740-R1	(LAG1.1 or LAG1.2 or LAG1.3 or LAG1.4 or LAG1.5)	Lipid metabolism: Sphingolipid metabolism	0	0	1000	0		2.3.1.24
GL0883	Acyl-CoA-dependent ceramide synthase	sphen[c] + acylcoa[c] <=> coa[c] + spmylin[c]	(GL31296-R1) or (GL31296-R2) or (GL31295-R1) or (GL31295-R2) or (GL26740-R1)	GL31296-R1 GL31296-R2 GL31295-R1 GL31295-R2 GL26740-R1	(LAG1.1 or LAG1.2 or LAG1.3 or LAG1.4 or LAG1.5)	Lipid metabolism: Sphingolipid metabolism	0	0	1000	0		2.3.1.24
GL0884	N-Acylsphingosine amidohydrolase	dcer2[c] + h2o[c] -> carbo[c] + sph[c] + 2 h[c]	(GL16966-R1) or (GL30086-R1)	GL16966-R1 GL30086-R1	(ASAH2 or YDC1)	Lipid metabolism: Sphingolipid metabolism	0	0	1000	0		3.5.1.23
GL0885	neutral ceramidase	pcer2[c] + h2o[c] -> carbo[c] + psph[c] + 2 h[c]	(GL16966-R1)	GL16966-R1	ASAH2	Lipid metabolism: Sphingolipid metabolism	0	0	1000	0		3.5.1.23
GL0886	sphingolipid delta-4 desaturase	dcer2[c] + nadph[c] + o2[c] + h[c] -> cer[c] + nadp[c] + 2 h2o[c]	(GL24114-R1)	GL24114-R1	DEGS	Lipid metabolism: Sphingolipid metabolism	0	0	1000	0		1.14.-.-
GL0887	sphingomyelin phosphodiesterase 2	spmylin[c] + h2o[c] + h[c] -> cer[c] + pcln[c]	(GL30344-R1)	GL30344-R1	SMPD2	Lipid metabolism: Sphingolipid metabolism	0	0	1000	0		3.1.4.12
GL0888	ceramide glucosyltransferase	udpglc[c] + cer[c] -> udp[c] + glucer[c] + 3 h[c]	(GL30004-R1)	GL30004-R1	UGCG	Lipid metabolism: Sphingolipid metabolism	0	0	1000	0		2.4.1.80
GL0889	fatty acid synthase subunit beta, fungi type	accoa[c] + acp[c] -> coa[c] + acacp[c]	(GL24188-R1)	GL24188-R1	FAS1	Lipid Metabolism: Fatty acid biosynthesis	0	0	1000	0		2.3.1.86
GL0890	fatty acid synthase subunit beta, fungi type	malcoa[c] + acp[c] -> malacp[c] + coa[c]	(GL24188-R1)	GL24188-R1	FAS1	Lipid Metabolism: Fatty acid biosynthesis	0	0	1000	0		2.3.1.86
GL0891	3-oxoacyl-[acyl-carrier protein] reductase	aacacp[c] + nadph[c] + h[c] <=> c4hacp[c] + nadp[c]	(GL29324-R1) or (GL19135-R1) or (GL24906-R1)	GL29324-R1 GL19135-R1 GL24906-R1	(FABG1.1 or FABG1.2 or FABG1.3)	Lipid Metabolism: Fatty acid biosynthesis	1	-1000	1000	0		1.1.1.100
GL0892	fatty acid synthase subunit beta, fungi type	c4hacp[c] <=> c4dacp[c] + h2o[c]	(GL24188-R1)	GL24188-R1	FAS1	Lipid Metabolism: Fatty acid biosynthesis	1	-1000	1000	0		2.3.1.86
GL0893	fatty acid synthase subunit beta, fungi type	c4dacp[c] + nadph[c] + h[c] <=> c40acp[c] + nadp[c]	(GL24188-R1)	GL24188-R1	FAS1	Lipid Metabolism: Fatty acid biosynthesis	1	-1000	1000	0		2.3.1.86
GL0894	oleoyl-[ACP] hydrolase	h2o[c] + c40acp[c] -> h[c] + acp[c] + c40[c]				Lipid Metabolism: Fatty acid biosynthesis	0	0	1000	0		3.1.2.14
GL0895	fatty acid synthase subunit alpha, fungi type	c40acp[c] + malacp[c] + h[c] -> c6oacp[c] + co2[c] + acp[c]			FAS2	Lipid Metabolism: Fatty acid biosynthesis	0	0	1000	0
GL0896	3-oxoacyl-[acyl-carrier protein] reductase	c6oacp[c] + nadph[c] + h[c] <=> c6hacp[c] + nadp[c]	(GL29324-R1) or (GL19135-R1) or (GL24906-R1)	GL29324-R1 GL19135-R1 GL24906-R1	(FABG1.1 or FABG1.2 or FABG1.3)	Lipid Metabolism: Fatty acid biosynthesis	1	-1000	1000	0		1.1.1.100
GL0897	fatty acid synthase subunit beta, fungi type	c6hacp[c] <=> c6dacp[c] + h2o[c]	(GL24188-R1)	GL24188-R1	FAS1	Lipid Metabolism: Fatty acid biosynthesis	1	-1000	1000	0		2.3.1.86
GL0898	fatty acid synthase subunit beta, fungi type	c6dacp[c] + nadph[c] + h[c] <=> c60acp[c] + nadp[c]	(GL24188-R1)	GL24188-R1	FAS1	Lipid Metabolism: Fatty acid biosynthesis	1	-1000	1000	0		2.3.1.86
GL0899	oleoyl-[ACP] hydrolase	h2o[c] + c60acp[c] -> h[c] + acp[c] + c60[c]				Lipid Metabolism: Fatty acid biosynthesis	0	0	1000	0		3.1.2.14
GL0900	fatty acid synthase subunit alpha, fungi type	c60acp[c] + malacp[c] + h[c] -> c8oacp[c] + co2[c] + acp[c]			FAS2	Lipid Metabolism: Fatty acid biosynthesis	0	0	1000	0
GL0901	3-oxoacyl-[acyl-carrier protein] reductase	c8oacp[c] + nadph[c] + h[c] <=> c8hacp[c] + nadp[c]	(GL29324-R1) or (GL19135-R1) or (GL24906-R1)	GL29324-R1 GL19135-R1 GL24906-R1	(FABG1.1 or FABG1.2 or FABG1.3)	Lipid Metabolism: Fatty acid biosynthesis	1	-1000	1000	0		1.1.1.100
GL0902	fatty acid synthase subunit beta, fungi type	c8hacp[c] <=> c8dacp[c] + h2o[c]	(GL24188-R1)	GL24188-R1	FAS1	Lipid Metabolism: Fatty acid biosynthesis	1	-1000	1000	0		2.3.1.86
GL0903	fatty acid synthase subunit beta, fungi type	c8dacp[c] + nadph[c] + h[c] <=> c80acp[c] + nadp[c]	(GL24188-R1)	GL24188-R1	FAS1	Lipid Metabolism: Fatty acid biosynthesis	1	-1000	1000	0		2.3.1.86
GL0904	oleoyl-[ACP] hydrolase	h2o[c] + c80acp[c] -> h[c] + acp[c] + c80[c]				Lipid Metabolism: Fatty acid biosynthesis	0	0	1000	0		3.1.2.14
GL0905	fatty acid synthase subunit alpha, fungi type	c80acp[c] + malacp[c] + h[c] -> c10oacp[c] + co2[c] + acp[c]			FAS2	Lipid Metabolism: Fatty acid biosynthesis	0	0	1000	0
GL0906	3-oxoacyl-[acyl-carrier protein] reductase	c10oacp[c] + nadph[c] + h[c] <=> c10hacp[c] + nadp[c]	(GL29324-R1) or (GL19135-R1) or (GL24906-R1)	GL29324-R1 GL19135-R1 GL24906-R1	(FABG1.1 or FABG1.2 or FABG1.3)	Lipid Metabolism: Fatty acid biosynthesis	1	-1000	1000	0		1.1.1.100
GL0907	fatty acid synthase subunit beta, fungi type	c10hacp[c] <=> c10dacp[c] + h2o[c]	(GL24188-R1)	GL24188-R1	FAS1	Lipid Metabolism: Fatty acid biosynthesis	1	-1000	1000	0		2.3.1.86
GL0908	fatty acid synthase subunit beta, fungi type	c10dacp[c] + nadph[c] + h[c] <=> c100acp[c] + nadp[c]	(GL24188-R1)	GL24188-R1	FAS1	Lipid Metabolism: Fatty acid biosynthesis	1	-1000	1000	0		2.3.1.86
GL0909	oleoyl-[ACP] hydrolase	h2o[c] + c100acp[c] -> h[c] + acp[c] + c100[c]				Lipid Metabolism: Fatty acid biosynthesis	0	0	1000	0		3.1.2.14
GL0910	fatty acid synthase subunit alpha, fungi type	c100acp[c] + malacp[c] + h[c] -> c12oacp[c] + co2[c] + acp[c]			FAS2	Lipid Metabolism: Fatty acid biosynthesis	0	0	1000	0
GL0911	3-oxoacyl-[acyl-carrier protein] reductase	c12oacp[c] + nadph[c] + h[c] <=> c12hacp[c] + nadp[c]	(GL29324-R1) or (GL19135-R1) or (GL24906-R1)	GL29324-R1 GL19135-R1 GL24906-R1	(FABG1.1 or FABG1.2 or FABG1.3)	Lipid Metabolism: Fatty acid biosynthesis	1	-1000	1000	0		1.1.1.100
GL0912	fatty acid synthase subunit beta, fungi type	c12hacp[c] <=> c12dacp[c] + h2o[c]	(GL24188-R1)	GL24188-R1	FAS1	Lipid Metabolism: Fatty acid biosynthesis	1	-1000	1000	0		2.3.1.86
GL0913	fatty acid synthase subunit beta, fungi type	c12dacp[c] + nadph[c] + h[c] <=> c120acp[c] + nadp[c]	(GL24188-R1)	GL24188-R1	FAS1	Lipid Metabolism: Fatty acid biosynthesis	1	-1000	1000	0		2.3.1.86
GL0914	oleoyl-[ACP] hydrolase	h2o[c] + c120acp[c] -> h[c] + acp[c] + c120[c]				Lipid Metabolism: Fatty acid biosynthesis	0	0	1000	0		3.1.2.14
GL0915	fatty acid synthase subunit alpha, fungi type	c120acp[c] + malacp[c] + h[c] -> c14oacp[c] + co2[c] + acp[c]			FAS2	Lipid Metabolism: Fatty acid biosynthesis	0	0	1000	0
GL0916	3-oxoacyl-[acyl-carrier protein] reductase	c14oacp[c] + nadph[c] + h[c] <=> c14hacp[c] + nadp[c]	(GL29324-R1) or (GL19135-R1) or (GL24906-R1)	GL29324-R1 GL19135-R1 GL24906-R1	(FABG1.1 or FABG1.2 or FABG1.3)	Lipid Metabolism: Fatty acid biosynthesis	1	-1000	1000	0		1.1.1.100
GL0917	fatty acid synthase subunit beta, fungi type	c14hacp[c] <=> c14dacp[c] + h2o[c]	(GL24188-R1)	GL24188-R1	FAS1	Lipid Metabolism: Fatty acid biosynthesis	1	-1000	1000	0		2.3.1.86
GL0918	fatty acid synthase subunit beta, fungi type	c14dacp[c] + nadph[c] + h[c] <=> c140acp[c] + nadp[c]	(GL24188-R1)	GL24188-R1	FAS1	Lipid Metabolism: Fatty acid biosynthesis	1	-1000	1000	0		2.3.1.86
GL0919	oleoyl-[ACP] hydrolase	h2o[c] + c140acp[c] -> h[c] + acp[c] + c140[c]				Lipid Metabolism: Fatty acid biosynthesis	0	0	1000	0		3.1.2.14
GL0920	fatty acid synthase subunit alpha, fungi type	c140acp[c] + malacp[c] + h[c] -> c16oacp[c] + co2[c] + acp[c]			FAS2	Lipid Metabolism: Fatty acid biosynthesis	0	0	1000	0
GL0921	3-oxoacyl-[acyl-carrier protein] reductase	c16oacp[c] + nadph[c] + h[c] <=> c16hacp[c] + nadp[c]	(GL29324-R1) or (GL19135-R1) or (GL24906-R1)	GL29324-R1 GL19135-R1 GL24906-R1	(FABG1.1 or FABG1.2 or FABG1.3)	Lipid Metabolism: Fatty acid biosynthesis	1	-1000	1000	0		1.1.1.100
GL0922	fatty acid synthase subunit beta, fungi type	c16hacp[c] <=> c16dacp[c] + h2o[c]	(GL24188-R1)	GL24188-R1	FAS1	Lipid Metabolism: Fatty acid biosynthesis	1	-1000	1000	0		2.3.1.86
GL0923	fatty acid synthase subunit beta, fungi type	c16dacp[c] + nadph[c] + h[c] <=> c160acp[c] + nadp[c]	(GL24188-R1)	GL24188-R1	FAS1	Lipid Metabolism: Fatty acid biosynthesis	1	-1000	1000	0		2.3.1.86
GL0924	oleoyl-[ACP] hydrolase	h2o[c] + c160acp[c] -> h[c] + acp[c] + c160[c]				Lipid Metabolism: Fatty acid biosynthesis	0	0	1000	0		3.1.2.14
GL0925	fatty acid synthase subunit alpha, fungi type	c160acp[c] + malacp[c] + h[c] -> c18oacp[c] + acp[c] + co2[c]			FAS2	Lipid Metabolism: Fatty acid biosynthesis	0	0	1000	0
GL0926	3-oxoacyl-[acyl-carrier protein] reductase	c18oacp[c] + nadph[c] + h[c] <=> c18hacp[c] + nadp[c]	(GL29324-R1) or (GL19135-R1) or (GL24906-R1)	GL29324-R1 GL19135-R1 GL24906-R1	(FABG1.1 or FABG1.2 or FABG1.3)	Lipid Metabolism: Fatty acid biosynthesis	1	-1000	1000	0		1.1.1.100
GL0927	fatty acid synthase subunit beta, fungi type	c160acp[c] + coa[c] <=> c160coa[c] + acp[c]	(GL24188-R1)	GL24188-R1	FAS1	Lipid Metabolism: Fatty acid biosynthesis	1	-1000	1000	0		2.3.1.86
GL0928	beta-ketoacyl-ACP synthase I	malacp[c] + acacp[c] + h[c] -> co2[c] + acp[c] + aacacp[c]				Lipid Metabolism: Fatty acid biosynthesis	0	0	1000	0		2.3.1.41
GL0929	Biotin carboxylase	hco3[c] + atp[c] + bccp[c] -> h[c] + pi[c] + adp[c] + cccp[c]				Lipid Metabolism: Fatty acid biosynthesis	0	0	1000	0		6.3.4.14
GL0930	acyl-CoA oxidase	fad[m] + c240coa[m] -> fadh2[m] + c24dcoa[m]	(GL23176-R1) or (GL26761-R1) or (GL27881-R1) or (GL26706-R1)	GL23176-R1 GL26761-R1 GL27881-R1 GL26706-R1	(ACOX1.1 or ACOX1.2 or ACOX1.3 or ACADM)	Lipid Metabolism: Fatty acid degradation	0	0	1000	0		1.3.3.6 1.3.8.7
GL0931	Enoyl-CoA hydratase	h2o[m] + c24dcoa[m] -> c24hcoa[m]	(GL27016-R1)	GL27016-R1	ECHS1	Lipid Metabolism: Fatty acid degradation	0	0	1000	0		4.2.1.17
GL0932	3-hydroxyacyl-CoA dehydrogenase	nad[m] + c24hcoa[m] -> nadh[m] + h[m] + c24ocoa[m]				Lipid Metabolism: Fatty acid degradation	0	0	1000	0		1.1.1.35/1.1.1.211
GL0933	acetyl-CoA C-acyltransferase	coa[m] + c24ocoa[m] -> accoa[m] + c220coa[m]	(GL30546-R1) or (GL23502-R1)	GL30546-R1 GL23502-R1	(ACAA1.1 or ACAA1.2)	Lipid Metabolism: Fatty acid degradation	0	0	1000	0		2.3.1.16
GL0934	acyl-CoA oxidase	fad[m] + c220coa[m] -> fadh2[m] + c22dcoa[m]	(GL23176-R1) or (GL26761-R1) or (GL27881-R1) or (GL26706-R1)	GL23176-R1 GL26761-R1 GL27881-R1 GL26706-R1	(ACOX1.1 or ACOX1.2 or ACOX1.3 or ACADM)	Lipid Metabolism: Fatty acid degradation	0	0	1000	0		1.3.3.6 1.3.8.7
GL0935	Enoyl-CoA hydratase	h2o[m] + c22dcoa[m] -> c22hcoa[m]	(GL27016-R1)	GL27016-R1	ECHS1	Lipid Metabolism: Fatty acid degradation	0	0	1000	0		4.2.1.17
GL0936	3-hydroxyacyl-CoA dehydrogenase	nad[m] + c22hcoa[m] -> nadh[m] + h[m] + c22ocoa[m]				Lipid Metabolism: Fatty acid degradation	0	0	1000	0		1.1.1.35/1.1.1.211
GL0937	acetyl-CoA C-acyltransferase	coa[m] + c22ocoa[m] -> accoa[m] + c200coa[m]	(GL30546-R1) or (GL23502-R1)	GL30546-R1 GL23502-R1	(ACAA1.1 or ACAA1.2)	Lipid Metabolism: Fatty acid degradation	0	0	1000	0		2.3.1.16
GL0938	acyl-CoA oxidase	fad[m] + c200coa[m] -> fadh2[m] + c20dcoa[m]	(GL23176-R1) or (GL26761-R1) or (GL27881-R1) or (GL26706-R1)	GL23176-R1 GL26761-R1 GL27881-R1 GL26706-R1	(ACOX1.1 or ACOX1.2 or ACOX1.3 or ACADM)	Lipid Metabolism: Fatty acid degradation	0	0	1000	0		1.3.3.6 1.3.8.7
GL0939	Enoyl-CoA hydratase	h2o[m] + c20dcoa[m] -> c20hcoa[m]	(GL27016-R1)	GL27016-R1	ECHS1	Lipid Metabolism: Fatty acid degradation	0	0	1000	0		4.2.1.17
GL0940	3-hydroxyacyl-CoA dehydrogenase	nad[m] + c20hcoa[m] -> nadh[m] + h[m] + c20ocoa[m]				Lipid Metabolism: Fatty acid degradation	0	0	1000	0		1.1.1.35/1.1.1.211
GL0941	acetyl-CoA C-acyltransferase	coa[m] + c20ocoa[m] -> accoa[m] + c180coa[m]	(GL30546-R1) or (GL23502-R1)	GL30546-R1 GL23502-R1	(ACAA1.1 or ACAA1.2)	Lipid Metabolism: Fatty acid degradation	0	0	1000	0		2.3.1.16
GL0942	acyl-CoA oxidase	fad[m] + c180coa[m] -> fadh2[m] + c18dcoa[m]	(GL23176-R1) or (GL26761-R1) or (GL27881-R1) or (GL26706-R1)	GL23176-R1 GL26761-R1 GL27881-R1 GL26706-R1	(ACOX1.1 or ACOX1.2 or ACOX1.3 or ACADM)	Lipid Metabolism: Fatty acid degradation	0	0	1000	0		1.3.3.6 1.3.8.7
GL0943	Enoyl-CoA hydratase	h2o[m] + c18dcoa[m] -> c18hcoa[m]	(GL27016-R1)	GL27016-R1	ECHS1	Lipid Metabolism: Fatty acid degradation	0	0	1000	0		4.2.1.17
GL0944	3-hydroxyacyl-CoA dehydrogenase	nad[m] + c18hcoa[m] -> nadh[m] + h[m] + c18ocoa[m]				Lipid Metabolism: Fatty acid degradation	0	0	1000	0		1.1.1.35/1.1.1.211
GL0945	acetyl-CoA C-acyltransferase	coa[m] + c18ocoa[m] -> accoa[m] + c160coa[m]	(GL30546-R1) or (GL23502-R1)	GL30546-R1 GL23502-R1	(ACAA1.1 or ACAA1.2)	Lipid Metabolism: Fatty acid degradation	0	0	1000	0		2.3.1.16
GL0946	acyl-CoA oxidase	fad[m] + c160coa[m] -> fadh2[m] + c16dcoa[m]	(GL23176-R1) or (GL26761-R1) or (GL27881-R1) or (GL26706-R1)	GL23176-R1 GL26761-R1 GL27881-R1 GL26706-R1	(ACOX1.1 or ACOX1.2 or ACOX1.3 or ACADM)	Lipid Metabolism: Fatty acid degradation	0	0	1000	0		1.3.3.6 1.3.8.7
GL0947	Enoyl-CoA hydratase	h2o[m] + c16dcoa[m] -> c16hcoa[m]	(GL27016-R1)	GL27016-R1	ECHS1	Lipid Metabolism: Fatty acid degradation	0	0	1000	0		4.2.1.17
GL0948	3-hydroxyacyl-CoA dehydrogenase	nad[m] + c16hcoa[m] -> nadh[m] + h[m] + c16ocoa[m]				Lipid Metabolism: Fatty acid degradation	0	0	1000	0		1.1.1.35/1.1.1.211
GL0949	acetyl-CoA C-acyltransferase	coa[m] + c16ocoa[m] -> accoa[m] + c140coa[m]	(GL30546-R1) or (GL23502-R1)	GL30546-R1 GL23502-R1	(ACAA1.1 or ACAA1.2)	Lipid Metabolism: Fatty acid degradation	0	0	1000	0		2.3.1.16
GL0950	acyl-CoA oxidase	fad[m] + c140coa[m] -> fadh2[m] + c14dcoa[m]	(GL23176-R1) or (GL26761-R1) or (GL27881-R1) or (GL26706-R1)	GL23176-R1 GL26761-R1 GL27881-R1 GL26706-R1	(ACOX1.1 or ACOX1.2 or ACOX1.3 or ACADM)	Lipid Metabolism: Fatty acid degradation	0	0	1000	0		1.3.3.6 1.3.8.7
GL0951	Enoyl-CoA hydratase	h2o[m] + c14dcoa[m] -> c14hcoa[m]	(GL27016-R1)	GL27016-R1	ECHS1	Lipid Metabolism: Fatty acid degradation	0	0	1000	0		4.2.1.17
GL0952	3-hydroxyacyl-CoA dehydrogenase	nad[m] + c14hcoa[m] -> nadh[m] + h[m] + c14ocoa[m]				Lipid Metabolism: Fatty acid degradation	0	0	1000	0		1.1.1.35/1.1.1.211
GL0953	acetyl-CoA C-acyltransferase	coa[m] + c14ocoa[m] -> accoa[m] + c120coa[m]	(GL30546-R1) or (GL23502-R1)	GL30546-R1 GL23502-R1	(ACAA1.1 or ACAA1.2)	Lipid Metabolism: Fatty acid degradation	0	0	1000	0		2.3.1.16
GL0954	acyl-CoA oxidase	fad[m] + c120coa[m] -> fadh2[m] + c12dcoa[m]	(GL23176-R1) or (GL26761-R1) or (GL27881-R1) or (GL26706-R1)	GL23176-R1 GL26761-R1 GL27881-R1 GL26706-R1	(ACOX1.1 or ACOX1.2 or ACOX1.3 or ACADM)	Lipid Metabolism: Fatty acid degradation	0	0	1000	0		1.3.3.6 1.3.8.7
GL0955	Enoyl-CoA hydratase	h2o[m] + c12dcoa[m] -> c12hcoa[m]	(GL27016-R1)	GL27016-R1	ECHS1	Lipid Metabolism: Fatty acid degradation	0	0	1000	0		4.2.1.17
GL0956	3-hydroxyacyl-CoA dehydrogenase	nad[m] + c12hcoa[m] -> nadh[m] + h[m] + c12ocoa[m]				Lipid Metabolism: Fatty acid degradation	0	0	1000	0		1.1.1.35/1.1.1.211
GL0957	acetyl-CoA C-acyltransferase	coa[m] + c12ocoa[m] -> accoa[m] + c100coa[m]	(GL30546-R1) or (GL23502-R1)	GL30546-R1 GL23502-R1	(ACAA1.1 or ACAA1.2)	Lipid Metabolism: Fatty acid degradation	0	0	1000	0		2.3.1.16
GL0958	acyl-CoA oxidase	fad[m] + c100coa[m] -> fadh2[m] + c10dcoa[m]	(GL23176-R1) or (GL26761-R1) or (GL27881-R1) or (GL26706-R1)	GL23176-R1 GL26761-R1 GL27881-R1 GL26706-R1	(ACOX1.1 or ACOX1.2 or ACOX1.3 or ACADM)	Lipid Metabolism: Fatty acid degradation	0	0	1000	0		1.3.3.6 1.3.8.7
GL0959	Enoyl-CoA hydratase	h2o[m] + c10dcoa[m] -> c10hcoa[m]	(GL27016-R1)	GL27016-R1	ECHS1	Lipid Metabolism: Fatty acid degradation	0	0	1000	0		4.2.1.17
GL0960	3-hydroxyacyl-CoA dehydrogenase	nad[m] + c10hcoa[m] -> nadh[m] + h[m] + c10ocoa[m]				Lipid Metabolism: Fatty acid degradation	0	0	1000	0		1.1.1.35/1.1.1.211
GL0961	acetyl-CoA C-acyltransferase	coa[m] + c10ocoa[m] -> accoa[m] + c80coa[m]	(GL30546-R1) or (GL23502-R1)	GL30546-R1 GL23502-R1	(ACAA1.1 or ACAA1.2)	Lipid Metabolism: Fatty acid degradation	0	0	1000	0		2.3.1.16
GL0962	acyl-CoA oxidase	fad[m] + c80coa[m] -> fadh2[m] + c8dcoa[m]	(GL23176-R1) or (GL26761-R1) or (GL27881-R1) or (GL26706-R1)	GL23176-R1 GL26761-R1 GL27881-R1 GL26706-R1	(ACOX1.1 or ACOX1.2 or ACOX1.3 or ACADM)	Lipid Metabolism: Fatty acid degradation	0	0	1000	0		1.3.3.6 1.3.8.7
GL0963	Enoyl-CoA hydratase	h2o[m] + c8dcoa[m] -> c8hcoa[m]	(GL27016-R1)	GL27016-R1	ECHS1	Lipid Metabolism: Fatty acid degradation	0	0	1000	0		4.2.1.17
GL0964	3-hydroxyacyl-CoA dehydrogenase	nad[m] + c8hcoa[m] -> nadh[m] + h[m] + c8ocoa[m]				Lipid Metabolism: Fatty acid degradation	0	0	1000	0		1.1.1.35/1.1.1.211
GL0965	acetyl-CoA C-acyltransferase	coa[m] + c8ocoa[m] -> accoa[m] + c60coa[m]	(GL30546-R1) or (GL23502-R1)	GL30546-R1 GL23502-R1	(ACAA1.1 or ACAA1.2)	Lipid Metabolism: Fatty acid degradation	0	0	1000	0		2.3.1.16
GL0966	acyl-CoA dehydrogenase	fad[m] + c60coa[m] -> fadh2[m] + c6dcoa[m]	(GL23176-R1) or (GL26761-R1) or (GL27881-R1) or (GL26706-R1)	GL23176-R1 GL26761-R1 GL27881-R1 GL26706-R1	(ACOX1.1 or ACOX1.2 or ACOX1.3 or ACADM)	Lipid Metabolism: Fatty acid degradation	0	0	1000	0		1.3.3.6 1.3.8.7
GL0967	Enoyl-CoA hydratase	h2o[m] + c6dcoa[m] -> c6hcoa[m]	(GL27016-R1)	GL27016-R1	ECHS1	Lipid Metabolism: Fatty acid degradation	0	0	1000	0		4.2.1.17
GL0968	3-hydroxyacyl-CoA dehydrogenase	nad[m] + c6hcoa[m] -> nadh[m] + h[m] + c6ocoa[m]				Lipid Metabolism: Fatty acid degradation	0	0	1000	0		1.1.1.35/1.1.1.211
GL0969	acetyl-CoA C-acyltransferase	coa[m] + c6ocoa[m] -> accoa[m] + c40coa[m]	(GL30546-R1) or (GL23502-R1)	GL30546-R1 GL23502-R1	(ACAA1.1 or ACAA1.2)	Lipid Metabolism: Fatty acid degradation	0	0	1000	0		2.3.1.16
GL0970	acyl-CoA dehydrogenase	fad[m] + c40coa[m] -> fadh2[m] + c4dcoa[m]	(GL23176-R1) or (GL26761-R1) or (GL27881-R1) or (GL26706-R1)	GL23176-R1 GL26761-R1 GL27881-R1 GL26706-R1	(ACOX1.1 or ACOX1.2 or ACOX1.3 or ACADM)	Lipid Metabolism: Fatty acid degradation	0	0	1000	0		1.3.3.6 1.3.8.7
GL0971	enoyl-CoA hydratase	h2o[m] + c4dcoa[m] -> c4hcoa[m]	(GL27016-R1)	GL27016-R1	ECHS1	Lipid Metabolism: Fatty acid degradation	0	0	1000	0		4.2.1.17
GL0972	3-hydroxyacyl-CoA dehydrogenase	nad[m] + c4hcoa[m] -> nadh[m] + h[m] + aaccoa[m]				Lipid Metabolism: Fatty acid degradation	0	0	1000	0		1.1.1.35/1.1.1.211
GL0973	palmitoyl-protein thioesterase	h2o[m] + c40coa[m] -> h[m] + coa[m] + c40[m]	(GL25670-R1)	GL25670-R1	PPT	Lipid Metabolism: Biosynthesis of saturated fatty acids	0	0	1000	0		3.1.2.22
GL0974	3-hydroxyacyl-CoA dehydrogenase	c6ocoa[c] + nadh[c] + h[c] <=> c6hcoa[c] + nad[c]				Lipid Metabolism: Biosynthesis of saturated fatty acids	1	-1000	1000	0		1.1.1.35/1.1.1.211
GL0975	enoyl-CoA hydratase	c6hcoa[c] <=> c6dcoa[c] + h2o[c]	(GL27016-R1)	GL27016-R1	ECHS1	Lipid Metabolism: Biosynthesis of saturated fatty acids	1	-1000	1000	0		4.2.1.17
GL0976	mitochondrial trans-2-enoyl-CoA reductase	c6dcoa[m] + nadph[m] + h[m] -> c60coa[m] + nadp[m]	(GL21676-R1)	GL21676-R1	MECR	Lipid Metabolism: Biosynthesis of saturated fatty acids	0	0	1000	0		1.3.1.38
GL0977	palmitoyl-protein thioesterase	h2o[m] + c60coa[m] -> h[m] + coa[m] + c60[m]	(GL25670-R1)	GL25670-R1	PPT	Lipid Metabolism: Biosynthesis of saturated fatty acids	0	0	1000	0		3.1.2.22
GL0978	3-hydroxyacyl-CoA dehydrogenase	c8ocoa[c] + nadh[c] + h[c] <=> c8hcoa[c] + nad[c]				Lipid Metabolism: Biosynthesis of saturated fatty acids	1	-1000	1000	0		1.1.1.35/1.1.1.211
GL0979	enoyl-CoA hydratase	c8hcoa[c] <=> c8dcoa[c] + h2o[c]	(GL27016-R1)	GL27016-R1	ECHS1	Lipid Metabolism: Biosynthesis of saturated fatty acids	1	-1000	1000	0		4.2.1.17
GL0980	mitochondrial trans-2-enoyl-CoA reductase	c8dcoa[m] + nadph[m] + h[m] -> c80coa[m] + nadp[m]	(GL21676-R1)	GL21676-R1	MECR	Lipid Metabolism: Biosynthesis of saturated fatty acids	0	0	1000	0		1.3.1.38
GL0981	palmitoyl-protein thioesterase	h2o[m] + c80coa[m] -> h[m] + coa[m] + c80[m]	(GL25670-R1)	GL25670-R1	PPT	Lipid Metabolism: Biosynthesis of saturated fatty acids	0	0	1000	0		3.1.2.22
GL0982	3-hydroxyacyl-CoA dehydrogenase	c10ocoa[c] + nadh[c] + h[c] <=> c10hcoa[c] + nad[c]				Lipid Metabolism: Biosynthesis of saturated fatty acids	1	-1000	1000	0		1.1.1.35/1.1.1.211
GL0983	enoyl-CoA hydratase	c10hcoa[c] <=> c10dcoa[c] + h2o[c]	(GL27016-R1)	GL27016-R1	ECHS1	Lipid Metabolism: Biosynthesis of saturated fatty acids	1	-1000	1000	0		4.2.1.17
GL0984	mitochondrial trans-2-enoyl-CoA reductase	c10dcoa[m] + nadph[m] + h[m] -> c100coa[m] + nadp[m]	(GL21676-R1)	GL21676-R1	MECR	Lipid Metabolism: Biosynthesis of saturated fatty acids	0	0	1000	0		1.3.1.38
GL0985	palmitoyl-protein thioesterase	h2o[m] + c100coa[m] -> h[m] + coa[m] + c100[m]	(GL25670-R1)	GL25670-R1	PPT	Lipid Metabolism: Biosynthesis of saturated fatty acids	0	0	1000	0		3.1.2.22
GL0986	3-hydroxyacyl-CoA dehydrogenase	c12ocoa[c] + nadh[c] + h[c] <=> c12hcoa[c] + nad[c]				Lipid Metabolism: Biosynthesis of saturated fatty acids	1	-1000	1000	0		1.1.1.35/1.1.1.211
GL0987	enoyl-CoA hydratase	c12hcoa[c] <=> c12dcoa[c] + h2o[c]	(GL27016-R1)	GL27016-R1	ECHS1	Lipid Metabolism: Biosynthesis of saturated fatty acids	1	-1000	1000	0		4.2.1.17
GL0988	mitochondrial trans-2-enoyl-CoA reductase	c12dcoa[m] + nadph[m] + h[m] -> c120coa[m] + nadp[m]	(GL21676-R1)	GL21676-R1	MECR	Lipid Metabolism: Biosynthesis of saturated fatty acids	0	0	1000	0		1.3.1.38
GL0989	palmitoyl-protein thioesterase	h2o[m] + c120coa[m] -> h[m] + coa[m] + c120[m]	(GL25670-R1)	GL25670-R1	PPT	Lipid Metabolism: Biosynthesis of saturated fatty acids	0	0	1000	0		3.1.2.22
GL0990	3-hydroxyacyl-CoA dehydrogenase	c14ocoa[c] + nadh[c] + h[c] <=> c14hcoa[c] + nad[c]				Lipid Metabolism: Biosynthesis of saturated fatty acids	1	-1000	1000	0		1.1.1.35/1.1.1.211
GL0991	enoyl-CoA hydratase	c14hcoa[c] <=> c14dcoa[c] + h2o[c]	(GL27016-R1)	GL27016-R1	ECHS1	Lipid Metabolism: Biosynthesis of saturated fatty acids	1	-1000	1000	0		4.2.1.17
GL0992	mitochondrial trans-2-enoyl-CoA reductase	c14dcoa[m] + nadph[m] + h[m] -> c140coa[m] + nadp[m]	(GL21676-R1)	GL21676-R1	MECR	Lipid Metabolism: Biosynthesis of saturated fatty acids	0	0	1000	0		1.3.1.38
GL0993	palmitoyl-protein thioesterase	h2o[m] + c140coa[m] -> h[m] + coa[m] + c140[m]	(GL25670-R1)	GL25670-R1	PPT	Lipid Metabolism: Biosynthesis of saturated fatty acids	0	0	1000	0		3.1.2.22
GL0994	3-hydroxyacyl-CoA dehydrogenase	c16ocoa[c] + nadh[c] + h[c] <=> c16hcoa[c] + nad[c]				Lipid Metabolism: Biosynthesis of saturated fatty acids	1	-1000	1000	0		1.1.1.35/1.1.1.211
GL0995	enoyl-CoA hydratase	c16hcoa[c] <=> c16dcoa[c] + h2o[c]	(GL27016-R1)	GL27016-R1	ECHS1	Lipid Metabolism: Biosynthesis of saturated fatty acids	1	-1000	1000	0		4.2.1.17
GL0996	mitochondrial trans-2-enoyl-CoA reductase	c16dcoa[m] + nadph[m] + h[m] -> c160coa[m] + nadp[m]	(GL21676-R1)	GL21676-R1	MECR	Lipid Metabolism: Biosynthesis of saturated fatty acids	0	0	1000	0		1.3.1.38
GL0997	palmitoyl-protein thioesterase	h2o[m] + c160coa[m] -> h[m] + coa[m] + c160[m]	(GL25670-R1)	GL25670-R1	PPT	Lipid Metabolism: Biosynthesis of saturated fatty acids	0	0	1000	0		3.1.2.22
GL0998	fatty acid elongase 3	h[c] + malcoa[c] + c160coa[c] -> coa[c] + co2[c] + c18ocoa[c]	(GL30558-R1)	GL30558-R1	ELO3	Lipid Metabolism: Biosynthesis of saturated fatty acids	0	0	1000	0		2.3.1.199
GL0999	very-long-chain 3-oxoacyl-CoA reductase	h[c] + nadph[c] + c18ocoa[c] <=> nadp[c] + c18hcoa[c]	(GL20137-R1) or (GL17560-R1)	GL20137-R1 GL17560-R1	(HSD17B12.1 or HSD17B12.2)	Lipid Metabolism: Biosynthesis of saturated fatty acids	1	-1000	1000	0		1.1.1.330
GL1000	very-long-chain (3R)-3-hydroxyacyl-[acyl-carrier protein] dehydratase	c18hcoa[c] <=> h2o[c] + c18dcoa[c]				Lipid Metabolism: Biosynthesis of saturated fatty acids	1	-1000	1000	0		4.2.1.134
GL1001	very-long-chain enoyl-CoA reductase	h[c] + nadph[c] + c18dcoa[c] -> nadp[c] + c180coa[c]	(GL25919-R1) or (GL25919-R2)	GL25919-R1 GL25919-R2	(TER1.1 or TER1.2)	Lipid Metabolism: Biosynthesis of saturated fatty acids	0	0	1000	0		1.3.1.93
GL1002	palmitoyl-protein thioesterase	h2o[c] + c180coa[c] -> h[c] + coa[c] + c180[c]				Lipid Metabolism: Biosynthesis of saturated fatty acids	0	0	1000	0		3.1.2.2
GL1003	fatty acid elongase 3	h[c] + malcoa[c] + c180coa[c] -> coa[c] + co2[c] + c20ocoa[c]	(GL30558-R1)	GL30558-R1	ELO3	Lipid Metabolism: Biosynthesis of saturated fatty acids	0	0	1000	0		2.3.1.199
GL1004	very-long-chain 3-oxoacyl-CoA reductase	h[c] + nadph[c] + c20ocoa[c] <=> nadp[c] + c20hcoa[c]	(GL20137-R1) or (GL17560-R1)	GL20137-R1 GL17560-R1	(HSD17B12.1 or HSD17B12.2)	Lipid Metabolism: Biosynthesis of saturated fatty acids	1	-1000	1000	0		1.1.1.330
GL1005	very-long-chain (3R)-3-hydroxyacyl-[acyl-carrier protein] dehydratase	c20hcoa[c] <=> h2o[c] + c20dcoa[c]				Lipid Metabolism: Biosynthesis of saturated fatty acids	1	-1000	1000	0		4.2.1.134
GL1006	very-long-chain enoyl-CoA reductase	h[c] + nadph[c] + c20dcoa[c] -> nadp[c] + c200coa[c]	(GL25919-R1) or (GL25919-R2)	GL25919-R1 GL25919-R2	(TER1.1 or TER1.2)	Lipid Metabolism: Biosynthesis of saturated fatty acids	0	0	1000	0		1.3.1.93
GL1007	palmitoyl-protein thioesterase	h2o[c] + c200coa[c] -> coa[c] + c200[c] + h[c]				Lipid Metabolism: Biosynthesis of saturated fatty acids	0	0	1000	0		3.1.2.2
GL1008	fatty acid elongase 3	h[c] + malcoa[c] + c200coa[c] -> coa[c] + co2[c] + c22ocoa[c]	(GL30558-R1)	GL30558-R1	ELO3	Lipid Metabolism: Biosynthesis of saturated fatty acids	0	0	1000	0		2.3.1.199
GL1009	very-long-chain 3-oxoacyl-CoA reductase	h[c] + nadph[c] + c22ocoa[c] <=> nadp[c] + c22hcoa[c]	(GL20137-R1) or (GL17560-R1)	GL20137-R1 GL17560-R1	(HSD17B12.1 or HSD17B12.2)	Lipid Metabolism: Biosynthesis of saturated fatty acids	1	-1000	1000	0		1.1.1.330
GL1010	very-long-chain (3R)-3-hydroxyacyl-[acyl-carrier protein] dehydratase	c22hcoa[c] <=> h2o[c] + c22dcoa[c]				Lipid Metabolism: Biosynthesis of saturated fatty acids	1	-1000	1000	0		4.2.1.134
GL1011	very-long-chain enoyl-CoA reductase	h[c] + nadph[c] + c22dcoa[c] -> nadp[c] + c220coa[c]	(GL25919-R1) or (GL25919-R2)	GL25919-R1 GL25919-R2	(TER1.1 or TER1.2)	Lipid Metabolism: Biosynthesis of saturated fatty acids	0	0	1000	0		1.3.1.93
GL1012	palmitoyl-protein thioesterase	h2o[c] + c220coa[c] -> coa[c] + c220[c] + h[c]				Lipid Metabolism: Biosynthesis of saturated fatty acids	0	0	1000	0		3.1.2.2
GL1013	fatty acid elongase 3	h[c] + malcoa[c] + c220coa[c] -> coa[c] + co2[c] + c24ocoa[c]	(GL30558-R1)	GL30558-R1	ELO3	Lipid Metabolism: Biosynthesis of saturated fatty acids	0	0	1000	0		2.3.1.199
GL1014	very-long-chain 3-oxoacyl-CoA reductase	h[c] + nadph[c] + c24ocoa[c] <=> nadp[c] + c24hcoa[c]	(GL20137-R1) or (GL17560-R1)	GL20137-R1 GL17560-R1	(HSD17B12.1 or HSD17B12.2)	Lipid Metabolism: Biosynthesis of saturated fatty acids	1	-1000	1000	0		1.1.1.330
GL1015	very-long-chain (3R)-3-hydroxyacyl-[acyl-carrier protein] dehydratase	c24hcoa[c] <=> h2o[c] + c24dcoa[c]				Lipid Metabolism: Biosynthesis of saturated fatty acids	1	-1000	1000	0		4.2.1.134
GL1016	very-long-chain enoyl-CoA reductase	h[c] + nadph[c] + c24dcoa[c] -> nadp[c] + c240coa[c]	(GL25919-R1) or (GL25919-R2)	GL25919-R1 GL25919-R2	(TER1.1 or TER1.2)	Lipid Metabolism: Biosynthesis of saturated fatty acids	0	0	1000	0		1.3.1.93
GL1017	palmitoyl-protein thioesterase	h2o[c] + c240coa[c] -> coa[c] + c240[c] + h[c]				Lipid Metabolism: Biosynthesis of saturated fatty acids	0	0	1000	0		3.1.2.2
GL1018	delta 9 desaturase	h[c] + nadh[c] + o2[c] + c160acp[c] -> 2 h2o[c] + nad[c] + c161acp[c]	(GL25107-R2) or (GL25107-R1) or (GL18154-R1) or (GL30752-R1)	GL25107-R2 GL25107-R1 GL18154-R1 GL30752-R1	(SCD1.1 or SCD1.2 or SCD1.3 or SCD1.4)	Lipid Metabolism: Biosynthesis of unsaturated fatty acids	0	0	1000	0		1.14.19.1
GL1019	oleoyl-[ACP] hydrolase	h2o[c] + c161acp[c] -> h[c] + acp[c] + c161[c]				Lipid Metabolism: Biosynthesis of unsaturated fatty acids	0	0	1000	0		3.1.2.14
GL1020	delta 9 desaturase	h[c] + nadh[c] + o2[c] + c161acp[c] -> 2 h2o[c] + nad[c] + c162acp[c]	(GL25107-R2) or (GL25107-R1) or (GL18154-R1) or (GL30752-R1)	GL25107-R2 GL25107-R1 GL18154-R1 GL30752-R1	(SCD1.1 or SCD1.2 or SCD1.3 or SCD1.4)	Lipid Metabolism: Biosynthesis of unsaturated fatty acids	0	0	1000	0		1.14.19.1
GL1021	oleoyl-[ACP] hydrolase	h2o[c] + c162acp[c] -> h[c] + acp[c] + c162[c]				Lipid Metabolism: Biosynthesis of unsaturated fatty acids	0	0	1000	0		3.1.2.14
GL1022	delta 9 desaturase	nadph[c] + h[c] + o2[c] + c180acp[c] -> nadp[c] + 2 h2o[c] + c181acp[c]	(GL25107-R2) or (GL25107-R1) or (GL18154-R1) or (GL30752-R1)	GL25107-R2 GL25107-R1 GL18154-R1 GL30752-R1	(SCD1.1 or SCD1.2 or SCD1.3 or SCD1.4)	Lipid Metabolism: Biosynthesis of unsaturated fatty acids	0	0	1000	0		1.14.19.1
GL1023	oleoyl-[ACP] hydrolase	h2o[c] + c181acp[c] -> h[c] + acp[c] + c181[c]				Lipid Metabolism: Biosynthesis of unsaturated fatty acids	0	0	1000	0		3.1.2.14
GL1024	delta 12 desaturase	nadph[c] + h[c] + o2[c] + c181acp[c] -> nadp[c] + 2 h2o[c] + c182acp[c]	(GL20908-R1) or (GL20908-R2) or (GL22223-R1) or (GL23646-R1) or (GL18436-R1)	GL20908-R1 GL20908-R2 GL22223-R1 GL23646-R1 GL18436-R1	(FAD2.1 FAD2.2 or FAD2.3 or FAD2.4 FAD2.5)	Lipid Metabolism: Biosynthesis of unsaturated fatty acids	0	0	1000	0		1.14.19.6
GL1025	oleoyl-[ACP] hydrolase	h2o[c] + c182acp[c] -> h[c] + acp[c] + c182[c]				Lipid Metabolism: Biosynthesis of unsaturated fatty acids	0	0	1000	0		3.1.2.14
GL1026	delta 9 desaturase	h[c] + nadph[c] + o2[c] + c160coa[c] -> 2 h2o[c] + nadp[c] + c161coa[c]	(GL25107-R2) or (GL25107-R1) or (GL18154-R1) or (GL30752-R1)	GL25107-R2 GL25107-R1 GL18154-R1 GL30752-R1	(SCD1.1 or SCD1.2 or SCD1.3 or SCD1.4)	Lipid Metabolism: Biosynthesis of unsaturated fatty acids	0	0	1000	0		1.14.19.1
GL1027	delta 9 desaturase	h[c] + nadph[c] + o2[c] + c161coa[c] -> 2 h2o[c] + nadp[c] + c162coa[c]	(GL25107-R2) or (GL25107-R1) or (GL18154-R1) or (GL30752-R1)	GL25107-R2 GL25107-R1 GL18154-R1 GL30752-R1	(SCD1.1 or SCD1.2 or SCD1.3 or SCD1.4)	Lipid Metabolism: Biosynthesis of unsaturated fatty acids	0	0	1000	0		1.14.19.1
GL1028	delta 9 desaturase	h[c] + nadph[c] + o2[c] + c180coa[c] -> 2 h2o[c] + nadp[c] + c181coa[c]	(GL25107-R2) or (GL25107-R1) or (GL18154-R1) or (GL30752-R1)	GL25107-R2 GL25107-R1 GL18154-R1 GL30752-R1	(SCD1.1 or SCD1.2 or SCD1.3 or SCD1.4)	Lipid Metabolism: Biosynthesis of unsaturated fatty acids	0	0	1000	0		1.14.19.1
GL1029	delta 12 desaturase	h[c] + nadph[c] + o2[c] + c181coa[c] -> 2 h2o[c] + nadp[c] + c182coa[c]	(GL20908-R1) or (GL20908-R2) or (GL22223-R1) or (GL23646-R1) or (GL18436-R1)	GL20908-R1 GL20908-R2 GL22223-R1 GL23646-R1 GL18436-R1	(FAD2.1 FAD2.2 or FAD2.3 or FAD2.4 FAD2.5)	Lipid Metabolism: Biosynthesis of unsaturated fatty acids	0	0	1000	0		1.14.19.6
GL1030	delta 12 desaturase	h[c] + nadph[c] + o2[c] + c182coa[c] -> 2 h2o[c] + nadp[c] + c183coa[c]	(GL20908-R1) or (GL20908-R2) or (GL22223-R1) or (GL23646-R1) or (GL18436-R1)	GL20908-R1 GL20908-R2 GL22223-R1 GL23646-R1 GL18436-R1	(FAD2.1 FAD2.2 or FAD2.3 or FAD2.4 FAD2.5)	Lipid Metabolism: Biosynthesis of unsaturated fatty acids	0	0	1000	0		1.14.19.6
GL1031	choloyl-CoA hydrolase	h2o[c] + c161coa[c] -> h[c] + coa[c] + c161[c]				Lipid Metabolism: Biosynthesis of unsaturated fatty acids	0	0	1000	0		3.1.2.27
GL1032	choloyl-CoA hydrolase	h2o[c] + c162coa[c] -> h[c] + coa[c] + c162[c]				Lipid Metabolism: Biosynthesis of unsaturated fatty acids	0	0	1000	0		3.1.2.27
GL1033	choloyl-CoA hydrolase	h2o[c] + c181coa[c] -> h[c] + coa[c] + c181[c]				Lipid Metabolism: Biosynthesis of unsaturated fatty acids	0	0	1000	0		3.1.2.27
GL1034	choloyl-CoA hydrolase	h2o[c] + c182coa[c] -> h[c] + coa[c] + c182[c]				Lipid Metabolism: Biosynthesis of unsaturated fatty acids	0	0	1000	0		3.1.2.27
GL1035	choloyl-CoA hydrolase	h2o[c] + c183coa[c] -> h[c] + coa[c] + c183[c]				Lipid Metabolism: Biosynthesis of unsaturated fatty acids	0	0	1000	0		3.1.2.27
GL1036	fatty acid elongase	h[c] + malcoa[c] + c181coa[c] -> coa[c] + co2[c] + c201ocoa[c]	(GL30558-R1)	GL30558-R1	ELO3	Lipid Metabolism: Biosynthesis of unsaturated fatty acids	0	0	1000	0		2.3.1.199
GL1037	very-long-chain 3-oxoacyl-CoA reductase	h[c] + nadph[c] + c201ocoa[c] <=> nadp[c] + c201hcoa[c]	(GL20137-R1) or (GL17560-R1)	GL20137-R1 GL17560-R1	(HSD17B12.1 or HSD17B12.2)	Lipid Metabolism: Biosynthesis of unsaturated fatty acids	1	-1000	1000	0		1.1.1.330
GL1038	very-long-chain (3R)-3-hydroxyacyl-[acyl-carrier protein] dehydratase	c201hcoa[c] <=> h2o[c] + c201dcoa[c]				Lipid Metabolism: Biosynthesis of unsaturated fatty acids	1	-1000	1000	0		4.2.1.134
GL1039	very-long-chain enoyl-CoA reductase	h[c] + nadph[c] + c201dcoa[c] <=> nadp[c] + c201coa[c]	(GL25919-R1) or (GL25919-R2)	GL25919-R1 GL25919-R2	TER	Lipid Metabolism: Biosynthesis of unsaturated fatty acids	1	-1000	1000	0		1.3.1.93
GL1040	choloyl-CoA hydrolase	h2o[c] + c201coa[c] -> coa[c] + c201[c] + h[c]				Lipid Metabolism: Biosynthesis of unsaturated fatty acids	0	0	1000	0		3.1.2.27
GL1041	fatty acid elongase	h[c] + malcoa[c] + c182coa[c] -> coa[c] + co2[c] + c202ocoa[c]	(GL30558-R1)	GL30558-R1	ELO3	Lipid Metabolism: Biosynthesis of unsaturated fatty acids	0	0	1000	0		2.3.1.199
GL1042	very-long-chain 3-oxoacyl-CoA reductase	h[c] + nadph[c] + c202ocoa[c] <=> nadp[c] + c202hcoa[c]	(GL20137-R1) or (GL17560-R1)	GL20137-R1 GL17560-R1	(HSD17B12.1 or HSD17B12.2)	Lipid Metabolism: Biosynthesis of unsaturated fatty acids	1	-1000	1000	0		1.1.1.330
GL1043	very-long-chain (3R)-3-hydroxyacyl-[acyl-carrier protein] dehydratase	c202hcoa[c] <=> h2o[c] + c202dcoa[c]				Lipid Metabolism: Biosynthesis of unsaturated fatty acids	1	-1000	1000	0		4.2.1.134
GL1044	very-long-chain enoyl-CoA reductase	h[c] + nadph[c] + c202dcoa[c] <=> nadp[c] + c202coa[c]	(GL25919-R1) or (GL25919-R2)	GL25919-R1 GL25919-R2	TER	Lipid Metabolism: Biosynthesis of unsaturated fatty acids	1	-1000	1000	0		1.3.1.93
GL1045	choloyl-CoA hydrolase	h2o[c] + c202coa[c] -> coa[c] + c202[c] + h[c]				Lipid Metabolism: Biosynthesis of unsaturated fatty acids	0	0	1000	0		3.1.2.27
GL1046	fatty acid elongase	h[c] + malcoa[c] + c183coa[c] -> coa[c] + co2[c] + c203ocoa[c]	(GL30558-R1)	GL30558-R1	ELO3	Lipid Metabolism: Biosynthesis of unsaturated fatty acids	0	0	1000	0		2.3.1.199
GL1047	very-long-chain 3-oxoacyl-CoA reductase	h[c] + nadph[c] + c203ocoa[c] <=> nadp[c] + c203hcoa[c]	(GL20137-R1) or (GL17560-R1)	GL20137-R1 GL17560-R1	(HSD17B12.1 or HSD17B12.2)	Lipid Metabolism: Biosynthesis of unsaturated fatty acids	1	-1000	1000	0		1.1.1.330
GL1048	very-long-chain (3R)-3-hydroxyacyl-[acyl-carrier protein] dehydratase	c203hcoa[c] <=> h2o[c] + c203dcoa[c]				Lipid Metabolism: Biosynthesis of unsaturated fatty acids	1	-1000	1000	0		4.2.1.134
GL1049	very-long-chain enoyl-CoA reductase	h[c] + nadph[c] + c203dcoa[c] <=> nadp[c] + c203coa[c]	(GL25919-R1) or (GL25919-R2)	GL25919-R1 GL25919-R2	(TER1.1 or TER1.2)	Lipid Metabolism: Biosynthesis of unsaturated fatty acids	1	-1000	1000	0		1.3.1.93
GL1050	choloyl-CoA hydrolase	h2o[c] + c203coa[c] -> coa[c] + c203[c] + h[c]				Lipid Metabolism: Biosynthesis of unsaturated fatty acids	0	0	1000	0		3.1.2.27
GL1051	Long-chain acyl-CoA synthetase	atp[c] + coa[c] + c40[c] -> amp[c] + ppi[c] + c40coa[c]	(GL23180-R1) or (GL23589-R1)	GL23180-R1 GL23589-R1	(ACSL1.1 or ASCL1.2)	Lipid Metabolism: Fatty acid metabolism	0	0	1000	0		6.2.1.3
GL1052	Long-chain acyl-CoA synthetase	atp[c] + coa[c] + c60[c] -> amp[c] + ppi[c] + c60coa[c]	(GL23180-R1) or (GL23589-R1)	GL23180-R1 GL23589-R1	(ACSL1.1 or ASCL1.2)	Lipid Metabolism: Fatty acid metabolism	0	0	1000	0		6.2.1.3
GL1053	Long-chain acyl-CoA synthetase	atp[c] + coa[c] + c80[c] -> amp[c] + ppi[c] + c80coa[c]	(GL23180-R1) or (GL23589-R1)	GL23180-R1 GL23589-R1	(ACSL1.1 or ASCL1.2)	Lipid Metabolism: Fatty acid metabolism	0	0	1000	0		6.2.1.3
GL1054	Long-chain acyl-CoA synthetase	atp[c] + coa[c] + c100[c] -> amp[c] + ppi[c] + c100coa[c]	(GL23180-R1) or (GL23589-R1)	GL23180-R1 GL23589-R1	(ACSL1.1 or ASCL1.2)	Lipid Metabolism: Fatty acid metabolism	0	0	1000	0		6.2.1.3
GL1055	Long-chain acyl-CoA synthetase	atp[c] + coa[c] + c120[c] -> amp[c] + ppi[c] + c120coa[c]	(GL23180-R1) or (GL23589-R1)	GL23180-R1 GL23589-R1	(ACSL1.1 or ASCL1.2)	Lipid Metabolism: Fatty acid metabolism	0	0	1000	0		6.2.1.3
GL1056	Long-chain acyl-CoA synthetase	atp[c] + coa[c] + c140[c] -> amp[c] + ppi[c] + c140coa[c]	(GL23180-R1) or (GL23589-R1)	GL23180-R1 GL23589-R1	(ACSL1.1 or ASCL1.2)	Lipid Metabolism: Fatty acid metabolism	0	0	1000	0		6.2.1.3
GL1057	Long-chain acyl-CoA synthetase	atp[c] + coa[c] + c160[c] -> amp[c] + ppi[c] + c160coa[c]	(GL23180-R1) or (GL23589-R1)	GL23180-R1 GL23589-R1	(ACSL1.1 or ASCL1.2)	Lipid Metabolism: Fatty acid metabolism	0	0	1000	0		6.2.1.3
GL1058	Long-chain acyl-CoA synthetase	coa[m] + atp[m] + c160[m] -> ppi[m] + amp[m] + c160coa[m]	(GL23180-R1) or (GL23589-R1)	GL23180-R1 GL23589-R1	(ACSL1.1 or ASCL1.2)	Lipid Metabolism: Fatty acid metabolism	0	0	1000	0		6.2.1.3
GL1059	Long-chain acyl-CoA synthetase	atp[c] + coa[c] + c161[c] -> amp[c] + ppi[c] + c161coa[c]	(GL23180-R1) or (GL23589-R1)	GL23180-R1 GL23589-R1	(ACSL1.1 or ASCL1.2)	Lipid Metabolism: Fatty acid metabolism	0	0	1000	0		6.2.1.3
GL1060	Long-chain acyl-CoA synthetase	atp[c] + coa[c] + c180[c] -> amp[c] + ppi[c] + c180coa[c]	(GL23180-R1) or (GL23589-R1)	GL23180-R1 GL23589-R1	(ACSL1.1 or ASCL1.2)	Lipid Metabolism: Fatty acid metabolism	0	0	1000	0		6.2.1.3
GL1061	Long-chain acyl-CoA synthetase	atp[c] + coa[c] + c200[c] -> amp[c] + ppi[c] + c200coa[c]	(GL23180-R1) or (GL23589-R1)	GL23180-R1 GL23589-R1	(ACSL1.1 or ASCL1.2)	Lipid Metabolism: Fatty acid metabolism	0	0	1000	0		6.2.1.3
GL1062	c161 Oxidation	6 coa[m] + 7 nad[m] + 7 h2o[m] + 6 fad[m] + c161coa[m] -> 8 accoa[m] + 7 nadp[m] + 7 h[m] + 6 fadh2[m]	(GL23176-R1 and GL27016-R1 and GL30546-R1) or (GL23176-R1 and GL27016-R1 and GL23502-R1) or (GL26761-R1 and GL27016-R1 and GL30546-R1) or (GL26761-R1 and GL27016-R1 and GL23502-R1) or (GL27881-R1 and GL27016-R1 and GL30546-R1) or (GL27881-R1 and GL27016-R1 and GL23502-R1)	GL23176-R1 GL26761-R1 GL27881-R1 GL27016-R1 GL30546-R1 GL23502-R1		Lipid Metabolism: Fatty acid metabolism	0	0	1000	0		1.3.3.6;4.2.1.17;1.1.1.35;2.3.1.16
GL1063	c162 Oxidation	7 coa[m] + 7 nad[m] + 8 h2o[m] + 5 fad[m] + c162coa[m] -> 9 accoa[m] + 7 nadp[m] + 7 h[m] + 5 fadh2[m]	(GL23176-R1 and GL27016-R1 and GL30546-R1) or (GL23176-R1 and GL27016-R1 and GL23502-R1) or (GL26761-R1 and GL27016-R1 and GL30546-R1) or (GL26761-R1 and GL27016-R1 and GL23502-R1) or (GL27881-R1 and GL27016-R1 and GL30546-R1) or (GL27881-R1 and GL27016-R1 and GL23502-R1)	GL23176-R1 GL26761-R1 GL27881-R1 GL27016-R1 GL30546-R1 GL23502-R1		Lipid Metabolism: Fatty acid metabolism	0	0	1000	0		1.3.3.6;4.2.1.17;1.1.1.35;2.3.1.16
GL1064	c181 Oxidation	7 coa[m] + 8 nad[m] + 8 h2o[m] + 7 fad[m] + c181coa[m] -> 9 accoa[m] + 8 nadp[m] + 9 h[m] + 7 fadh2[m]	(GL23176-R1 and GL27016-R1 and GL30546-R1) or (GL23176-R1 and GL27016-R1 and GL23502-R1) or (GL26761-R1 and GL27016-R1 and GL30546-R1) or (GL26761-R1 and GL27016-R1 and GL23502-R1) or (GL27881-R1 and GL27016-R1 and GL30546-R1) or (GL27881-R1 and GL27016-R1 and GL23502-R1)	GL23176-R1 GL26761-R1 GL27881-R1 GL27016-R1 GL30546-R1 GL23502-R1		Lipid Metabolism: Fatty acid metabolism	0	0	1000	0		1.3.3.6;4.2.1.17;1.1.1.35;2.3.1.16
GL1065	c182 Oxidation	8 coa[m] + 8 nad[m] + 9 h2o[m] + 6 fad[m] + c182coa[m] -> 10 accoa[m] + 8 nadp[m] + 9 h[m] + 6 fadh2[m]	(GL23176-R1 and GL27016-R1 and GL30546-R1) or (GL23176-R1 and GL27016-R1 and GL23502-R1) or (GL26761-R1 and GL27016-R1 and GL30546-R1) or (GL26761-R1 and GL27016-R1 and GL23502-R1) or (GL27881-R1 and GL27016-R1 and GL30546-R1) or (GL27881-R1 and GL27016-R1 and GL23502-R1)	GL23176-R1 GL26761-R1 GL27881-R1 GL27016-R1 GL30546-R1 GL23502-R1		Lipid Metabolism: Fatty acid metabolism	0	0	1000	0		1.3.3.6;4.2.1.17;1.1.1.35;2.3.1.16
GL1066	c183 Oxidation	9 coa[m] + 8 nad[m] + 10 h2o[m] + 5 fad[m] + c183coa[m] -> 11 accoa[m] + 8 nadp[m] + 9 h[m] + 5 fadh2[m]	(GL23176-R1 and GL27016-R1 and GL30546-R1) or (GL23176-R1 and GL27016-R1 and GL23502-R1) or (GL26761-R1 and GL27016-R1 and GL30546-R1) or (GL26761-R1 and GL27016-R1 and GL23502-R1) or (GL27881-R1 and GL27016-R1 and GL30546-R1) or (GL27881-R1 and GL27016-R1 and GL23502-R1)	GL23176-R1 GL26761-R1 GL27881-R1 GL27016-R1 GL30546-R1 GL23502-R1		Lipid Metabolism: Fatty acid metabolism	0	0	1000	0		1.3.3.6;4.2.1.17;1.1.1.35;2.3.1.16
GL1067	c201 Oxidation	8 coa[m] + 9 nad[m] + 9 h2o[m] + 8 fad[m] + c201coa[m] -> 10 accoa[m] + 9 nadp[m] + 9 h[m] + 8 fadh2[m]	(GL23176-R1 and GL27016-R1 and GL30546-R1) or (GL23176-R1 and GL27016-R1 and GL23502-R1) or (GL26761-R1 and GL27016-R1 and GL30546-R1) or (GL26761-R1 and GL27016-R1 and GL23502-R1) or (GL27881-R1 and GL27016-R1 and GL30546-R1) or (GL27881-R1 and GL27016-R1 and GL23502-R1)	GL23176-R1 GL26761-R1 GL27881-R1 GL27016-R1 GL30546-R1 GL23502-R1		Lipid Metabolism: Fatty acid metabolism	0	0	1000	0		1.3.3.6;4.2.1.17;1.1.1.35;2.3.1.16
GL1068	c202 Oxidation	9 coa[m] + 9 nad[m] + 10 h2o[m] + 7 fad[m] + c202coa[m] -> 11 accoa[m] + 9 nadp[m] + 9 h[m] + 7 fadh2[m]	(GL23176-R1 and GL27016-R1 and GL30546-R1) or (GL23176-R1 and GL27016-R1 and GL23502-R1) or (GL26761-R1 and GL27016-R1 and GL30546-R1) or (GL26761-R1 and GL27016-R1 and GL23502-R1) or (GL27881-R1 and GL27016-R1 and GL30546-R1) or (GL27881-R1 and GL27016-R1 and GL23502-R1)	GL23176-R1 GL26761-R1 GL27881-R1 GL27016-R1 GL30546-R1 GL23502-R1		Lipid Metabolism: Fatty acid metabolism	0	0	1000	0		1.3.3.6;4.2.1.17;1.1.1.35;2.3.1.16
GL1069	c203 Oxidation	10 coa[m] + 9 nad[m] + 11 h2o[m] + 6 fad[m] + c203coa[m] -> 12 accoa[m] + 9 nadp[m] + 9 h[m] + 6 fadh2[m]	(GL23176-R1 and GL27016-R1 and GL30546-R1) or (GL23176-R1 and GL27016-R1 and GL23502-R1) or (GL26761-R1 and GL27016-R1 and GL30546-R1) or (GL26761-R1 and GL27016-R1 and GL23502-R1) or (GL27881-R1 and GL27016-R1 and GL30546-R1) or (GL27881-R1 and GL27016-R1 and GL23502-R1)	GL23176-R1 GL26761-R1 GL27881-R1 GL27016-R1 GL30546-R1 GL23502-R1		Lipid Metabolism: Fatty acid metabolism	0	0	1000	0		1.3.3.6;4.2.1.17;1.1.1.35;2.3.1.16
GL1070	acyl-CoA oxidase	fad[m] + o8coa[m] -> fadh2[m] + t2eo8coa[m]	(GL23176-R1) or (GL26761-R1) or (GL27881-R1)	GL23176-R1 GL26761-R1 GL27881-R1	(ACOX1.1 or ACOX1.2 or ACOX1.3)	Lipid Metabolism: alpha-Linolenic acid metabolism	0	0	1000	0		1.3.3.6
GL1071	acyl-CoA oxidase	fad[c] + o8coa[c] -> fadh2[c] + t2eo8coa[c]	(GL23176-R1) or (GL26761-R1) or (GL27881-R1)	GL23176-R1 GL26761-R1 GL27881-R1	(ACOX1.2 or ACOX1.3)	Lipid Metabolism: alpha-Linolenic acid metabolism	0	0	1000	0		1.3.3.6
GL1072	acyl-CoA oxidase	fad[m] + o6coa[m] -> fadh2[m] + t2eo6coa[m]	(GL23176-R1) or (GL26761-R1) or (GL27881-R1)	GL23176-R1 GL26761-R1 GL27881-R1	(ACOX1.1 or ACOX1.2 or ACOX1.3)	Lipid Metabolism: alpha-Linolenic acid metabolism	0	0	1000	0		1.3.3.6
GL1073	acyl-CoA oxidase	fad[c] + o6coa[c] -> fadh2[c] + t2eo6coa[c]	(GL23176-R1) or (GL26761-R1) or (GL27881-R1)	GL23176-R1 GL26761-R1 GL27881-R1	(ACOX1.2 or ACOX1.3)	Lipid Metabolism: alpha-Linolenic acid metabolism	0	0	1000	0		1.3.3.6
GL1074	acyl-CoA oxidase	fad[m] + o4coa[m] -> fadh2[m] + t2eo4coa[m]	(GL23176-R1) or (GL26761-R1) or (GL27881-R1)	GL23176-R1 GL26761-R1 GL27881-R1	(ACOX1.1 or ACOX1.2 or ACOX1.3)	Lipid Metabolism: alpha-Linolenic acid metabolism	0	0	1000	0		1.3.3.6
GL1075	acyl-CoA oxidase	fad[c] + o4coa[c] -> fadh2[c] + t2eo4coa[c]	(GL23176-R1) or (GL26761-R1) or (GL27881-R1)	GL23176-R1 GL26761-R1 GL27881-R1	(ACOX1.2 or ACOX1.3)	Lipid Metabolism: alpha-Linolenic acid metabolism	0	0	1000	0		1.3.3.6
GL1076	acetyl-CoA acyltransferase	coa[c] + 3op8coa[c] -> acylcoa[c] + o6coa[c]	(GL30546-R1) or (GL23502-R1)	GL30546-R1 GL23502-R1	(ACAA1.1 or ACAA1.2)	Lipid Metabolism: alpha-Linolenic acid metabolism	0	0	1000	0		2.3.1.16
GL1077	acetyl-CoA acyltransferase	coa[m] + 3op8coa[m] -> o6coa[m] + acylcoa[m]	(GL30546-R1) or (GL23502-R1)	GL30546-R1 GL23502-R1	(ACAA1.1 or ACAA1.2)	Lipid Metabolism: alpha-Linolenic acid metabolism	0	0	1000	0		2.3.1.16
GL1078	acetyl-CoA acyltransferase	coa[c] + 3op6coa[c] -> acylcoa[c] + o4coa[c]	(GL30546-R1) or (GL23502-R1)	GL30546-R1 GL23502-R1	(ACAA1.1 or ACAA1.2)	Lipid Metabolism: alpha-Linolenic acid metabolism	0	0	1000	0		2.3.1.16
GL1079	acetyl-CoA acyltransferase	coa[m] + 3op6coa[m] -> acylcoa[m] + o4coa[m]	(GL30546-R1) or (GL23502-R1)	GL30546-R1 GL23502-R1	(ACAA1.1 or ACAA1.2)	Lipid Metabolism: alpha-Linolenic acid metabolism	0	0	1000	0		2.3.1.16
GL1080	acetyl-CoA acyltransferase	coa[c] + 3op4coa[c] -> acylcoa[c] + o4coa[c]	(GL30546-R1) or (GL23502-R1)	GL30546-R1 GL23502-R1	(ACAA1.1 or ACAA1.2)	Lipid Metabolism: alpha-Linolenic acid metabolism	0	0	1000	0		2.3.1.16
GL1081	acetyl-CoA acyltransferase	coa[m] + 3op4coa[m] -> acylcoa[m] + o4coa[m]	(GL30546-R1) or (GL23502-R1)	GL30546-R1 GL23502-R1	(ACAA1.1 or ACAA1.2)	Lipid Metabolism: alpha-Linolenic acid metabolism	0	0	1000	0		2.3.1.16
GL1082	cytosolic phospholipase A2	h2o[c] + pc[c] -> 4 h[c] + lpc[c] + alin[c]	(GL24737-R1)	GL24737-R1	PLA2G	Lipid Metabolism: alpha-Linolenic acid metabolism	0	0	1000	0		3.1.1.4
GL1083	enoyl-CoA hydratase	2 h[m] + h2o[m] + t2eo4coa[m] -> 3op4coa[m]	(GL27016-R1)	GL27016-R1	ECHS1	Lipid Metabolism: alpha-Linolenic acid metabolism	0	0	1000	0		4.2.1.17
GL1084	enoyl-CoA hydratase	2 h[c] + h2o[c] + t2eo4coa[c] -> 3op4coa[c]	(GL27016-R1)	GL27016-R1	ECHS1	Lipid Metabolism: alpha-Linolenic acid metabolism	0	0	1000	0		4.2.1.17
GL1085	enoyl-CoA hydratase	2 h[m] + h2o[m] + t2eo6coa[m] -> 3op6coa[m]	(GL27016-R1)	GL27016-R1	ECHS1	Lipid Metabolism: alpha-Linolenic acid metabolism	0	0	1000	0		4.2.1.17
GL1086	enoyl-CoA hydratase	2 h[c] + h2o[c] + t2eo6coa[c] -> 3op6coa[c]	(GL27016-R1)	GL27016-R1	ECHS1	Lipid Metabolism: alpha-Linolenic acid metabolism	0	0	1000	0		4.2.1.17
GL1087	enoyl-CoA hydratase	2 h[m] + h2o[m] + t2eo8coa[m] -> 3op8coa[m]	(GL27016-R1)	GL27016-R1	ECHS1	Lipid Metabolism: alpha-Linolenic acid metabolism	0	0	1000	0		4.2.1.17
GL1088	enoyl-CoA hydratase	2 h[c] + h2o[c] + t2eo8coa[c] -> 3op8coa[c]	(GL27016-R1)	GL27016-R1	ECHS1	Lipid Metabolism: alpha-Linolenic acid metabolism	0	0	1000	0		4.2.1.17
GL1089	hydroxymethylglutaryl-CoA reductase (NADPH)	h3mcoa[c] + 2 nadph[c] + 2 h[c] -> mvl[c] + coa[c] + 2 nadp[c]	(GL24088-R1)	GL24088-R1	HMGCR	Metabolism of terpenoids and polyketides: Terpenoid backbone biosynthesis	0	0	1000	0		1.1.1.34
GL1090	phosphomevalonate kinase	atp[m] + pmvl[m] + h[m] -> adp[m] + ppmvl[m]	(GL17808-R1)	GL17808-R1	MVAK2	Metabolism of terpenoids and polyketides: Terpenoid backbone biosynthesis	0	0	1000	0		2.7.4.2
GL1091	phosphomevalonate kinase	atp[c] + pmvl[c] + h[c] -> adp[c] + ppmvl[c]	(GL17808-R1)	GL17808-R1	MVAK2	Metabolism of terpenoids and polyketides: Terpenoid backbone biosynthesis	0	0	1000	0		2.7.4.2
GL1092	diphosphomevalonate decarboxylase	atp[c] + ppmvl[c] -> adp[c] + pi[c] + ippp[c] + co2[c] + h[c]	(GL25304-R1)	GL25304-R1	MVD	Metabolism of terpenoids and polyketides: Terpenoid backbone biosynthesis	0	0	1000	0		4.1.1.33
GL1093	isopentenyl-diphosphate delta-isomerase	ippp[c] <=> dmpp[c]	(GL29704-R1)	GL29704-R1	IDI	Metabolism of terpenoids and polyketides: Terpenoid backbone biosynthesis	1	-1000	1000	0		5.3.3.2
GL1094	farnesyl diphosphate synthase	dmpp[c] + ippp[c] -> ppi[c] + gpp[c]	(GL25499-R1) or (GL22068-R1)	GL25499-R1 GL22068-R1	(FDPS1.1 or FDPS1.2)	Metabolism of terpenoids and polyketides: Terpenoid backbone biosynthesis	0	0	1000	0		2.5.1.1
GL1095	geranylgeranyl diphosphate synthase, type III	gpp[c] + ippp[c] -> ppi[c] + fpp[c]	(GL24453-R1)	GL24453-R1	GGPS1	Metabolism of terpenoids and polyketides: Terpenoid backbone biosynthesis	0	0	1000	0		2.5.1.10
GL1096	geranylgeranyl diphosphate synthase, type III	fpp[c] + ippp[c] -> ppi[c] + ggpp[c]	(GL24453-R1)	GL24453-R1	GGPS1	Metabolism of terpenoids and polyketides: Terpenoid backbone biosynthesis	0	0	1000	0		2.5.1.29
GL1097	hexaprenyl-diphosphate synthase	fpp[m] + 3 ippp[m] + h[m] -> alka[m] + 3 ppi[m]	(GL29478-R1)	GL29478-R1	COQ1	Metabolism of terpenoids and polyketides: Terpenoid backbone biosynthesis	0	0	1000	0		2.5.1.83
GL1098	ditrans,polycis-polyprenyl diphosphate synthase	fpp[c] + ippp[c] -> dedip[c] + ppi[c]	(GL24585-R1) or (GL30574-R1)	GL24585-R1 GL30574-R1	(DHDDS or NUS1)	Metabolism of terpenoids and polyketides: Terpenoid backbone biosynthesis	0	0	1000	0		2.5.1.87
GL1099	protein farnesyltransferase	fpp[c] + pcysn[c] -> sfp[c] + ppi[c]	(GL15842-R1 and GL22321-R1)	GL15842-R1 GL22321-R1	(FNTB and FNTA)	Metabolism of terpenoids and polyketides: Terpenoid backbone biosynthesis	0	0	1000	0		2.5.1.58
GL1100	prenyl protein peptidase	sfp[c] + 2 h[c] + h2o[c] -> pcsfcys[c] + pt[c]	(GL21984-R2) or (GL21984-R1) or (GL22640-R1)	GL21984-R2 GL21984-R1 GL22640-R1	(STE24.1 or STE24.2 or FACE2)	Metabolism of terpenoids and polyketides: Terpenoid backbone biosynthesis	0	0	1000	0		3.4.24.84 3.4.22.-
GL1101	protein-S-isoprenylcysteine O-methyltransferase	sam[c] + pcsfcys[c] -> sah[c] + pcsfcysme[c] + h[c]	(GL31565-R1)	GL31565-R1	STE14	Metabolism of terpenoids and polyketides: Terpenoid backbone biosynthesis	0	0	1000	0		2.1.1.100
GL1102	spontaneous reaction	pcsfcysme[c] -> facys[c]				Metabolism of terpenoids and polyketides: Terpenoid backbone biosynthesis	0	0	1000	0
GL1103	prenylcysteine oxidase / farnesylcysteine lyase	facys[c] + o2[c] + h2o[c] -> 2t6tfal[c] + cys[c] + h2o2[c]	(GL27133-R1)	GL27133-R1	PCYOX1/FCLY	Metabolism of terpenoids and polyketides: Terpenoid backbone biosynthesis	0	0	1000	0		1.8.3.5 1.8.3.6
GL1104	prenylcysteine oxidase / farnesylcysteine lyase	facys[m] + o2[m] + h2o[m] -> 2t6tfal[m] + cys[m] + h2o2[m]	(GL27133-R1)	GL27133-R1	PCYOX1/FCLY	Metabolism of terpenoids and polyketides: Terpenoid backbone biosynthesis	0	0	1000	0		1.8.3.5 1.8.3.6
GL1105	spontaneous reaction	dedip[c] -> doldp[c]				Metabolism of terpenoids and polyketides: Terpenoid backbone biosynthesis	0	0	1000	0
GL1106	Mevalonate kinase	atp[c] + mvl[c] -> h[c] + adp[c] + pmvl[c]				Metabolism of terpenoids and polyketides: Terpenoid backbone biosynthesis	0	0	1000	0		2.7.1.36
GL1107	Dolichyldiphosphatase	doldp[c] + h2o[c] -> dolp[c] + pi[c] + h[c]	(GL20894-R1) or (GL24942-R1)	GL20894-R1 GL24942-R1	(DOLPP1 or DOLPP2)	Glycan biosynthesis and metabolism: N-Glycan biosynthesis	0	0	1000	0		3.6.1.43
GL1108	UDP-N-acetylglucosamine--dolichyl-phosphate N-acetylglucosaminephosphotransferase	udpnag[c] + dolp[c] <=> ump[c] + nadgldpl[c]	(GL23621-R1)	GL23621-R1	ALG7	Glycan biosynthesis and metabolism: N-Glycan biosynthesis	1	-1000	1000	0		2.7.8.15
GL1109	Beta-1,4-N-acetylglucosaminyltransferase	udpnag[c] + nadgldpl[c] -> udp[c] + cdppd[c] + h[c]	(GL25442-R1)	GL25442-R1	ALG14	Glycan biosynthesis and metabolism: N-Glycan biosynthesis	0	0	1000	0		2.4.1.144
GL1110	Beta-1,4-mannosyltransferase	gdpman[c] + cdppd[c] -> gdp[c] + g00003[c] + h[c]	(GL29609-R1)	GL29609-R1	ALG1	Glycan biosynthesis and metabolism: N-Glycan biosynthesis	0	0	1000	0		2.4.1.142
GL1111	Glycolipid 3-alpha-mannosyltransferase	gdpman[c] + g00003[c] -> gdp[c] + g00004[c] + h[c]	(GL22888-R1)	GL22888-R1	ALG2	Glycan biosynthesis and metabolism: N-Glycan biosynthesis	0	0	1000	0		2.4.1.132
GL1112	Glycolipid 3-alpha-mannosyltransferase	gdpman[c] + g00004[c] -> gdp[c] + g00005[c] + h[c]	(GL22888-R1)	GL22888-R1	ALG2	Glycan biosynthesis and metabolism: N-Glycan biosynthesis	0	0	1000	0		2.4.1.257
GL1113	Alpha-1,2-mannosyltransferase	g00005[c] + gdpman[c] -> g10526[c] + gdp[c] + h[c]	(GL24380-R1)	GL24380-R1	ALG11	Glycan biosynthesis and metabolism: N-Glycan biosynthesis	0	0	1000	0		2.4.1.131
GL1114	Alpha-1,2-mannosyltransferase	g10526[c] + gdpman[c] -> g00006[c] + gdp[c] + h[c]	(GL24380-R1)	GL24380-R1	ALG11	Glycan biosynthesis and metabolism: N-Glycan biosynthesis	0	0	1000	0		2.4.1.131
GL1115	Dolichol-phosphate mannosyltransferase	gdpman[c] + dolp[c] -> gdp[c] + dolmanp[c]	(GL22207-R1)	GL22207-R1	DPM1	Glycan biosynthesis and metabolism: N-Glycan biosynthesis	0	0	1000	0		2.4.1.83
GL1116	Alpha-1,3-mannosyltransferase	dolmanp[c] + g00006[c] -> dolp[c] + g10595[c] + h[c]	(GL17348-R1) or (GL24686-R1)	GL17348-R1 GL24686-R1	(ALG3.1 or ALG3.2)	Glycan biosynthesis and metabolism: N-Glycan biosynthesis	0	0	1000	0		2.4.1.258
GL1117	Dolichyl-phosphate beta-glucosyltransferase	udpglc[c] + dolp[c] -> udp[c] + dolgp[c]	(GL19116-R1)	GL19116-R1	ALG5	Glycan biosynthesis and metabolism: N-Glycan biosynthesis	0	0	1000	0		2.4.1.117
GL1118	Alpha-1,2-mannosyltransferase	dolmanp[c] + g10595[c] -> dolp[c] + g10596[c] + h[c]	(GL29468-R1)	GL29468-R1	ALG9	Glycan biosynthesis and metabolism: N-Glycan biosynthesis	0	0	1000	0		2.4.1.259
GL1119	Alpha-1,2-mannosyltransferase	dolmanp[c] + g10597[c] -> dolp[c] + g00007[c] + h[c]	(GL29468-R1)	GL29468-R1	ALG9	Glycan biosynthesis and metabolism: N-Glycan biosynthesis	0	0	1000	0		2.4.1.261
GL1120	Alpha-1,6-mannosyltransferase	dolmanp[c] + g10596[c] -> dolp[c] + g10597[c] + h[c]	(GL17041-R1)	GL17041-R1	ALG12	Glycan biosynthesis and metabolism: N-Glycan biosynthesis	0	0	1000	0		2.4.1.260
GL1121	Alpha-1,3-glucosyltransferase	dolgp[c] + g00007[c] -> dolp[c] + g10598[c] + h[c]	(GL16923-R1)	GL16923-R1	ALG6	Glycan biosynthesis and metabolism: N-Glycan biosynthesis	0	0	1000	0		2.4.1.267
GL1122	Alpha-1,3-glucosyltransferase	dolgp[c] + g10598[c] -> dolp[c] + g10599[c] + h[c]	(GL31336-R1)	GL31336-R1	ALG8	Glycan biosynthesis and metabolism: N-Glycan biosynthesis	0	0	1000	0		2.4.1.265
GL1123	Alpha-1,2-glucosyltransferase	dolgp[c] + g10599[c] -> dolp[c] + g00008[c] + h[c]	(GL29870-R1) or (GL29870-R2)	GL29870-R1 GL29870-R2	ALG10	Glycan biosynthesis and metabolism: N-Glycan biosynthesis	0	0	1000	0		2.4.1.256
GL1124	Dolichyl-diphosphooligosaccharide--protein glycosyltransferase	pasn[c] + g00008[c] -> doldp[c] + g00009[c]	(GL31136-R1 and GL26650-R1 and GL19811-R1) or (GL20856-R1 and GL22881-R1) or (GL21733-R1)	GL31136-R1 GL26650-R1 GL19811-R1 GL20856-R1 GL22881-R1 GL21733-R1	(OST1 and OST2 and OST3) or (SWP1 and SWP2) or STT3	Glycan biosynthesis and metabolism: N-Glycan biosynthesis	0	0	1000	0		2.4.99.18
GL1125	mannosyl-oligosaccharide glucosidase	h2o[c] + g00009[c] -> glc[c] + g00171[c]				Glycan biosynthesis and metabolism: N-Glycan biosynthesis	0	0	1000	0		3.2.1.106
GL1126	Alpha 1,3-glucosidase	h2o[c] + g00171[c] -> glc[c] + g00010[c]	(GL19735-R1)	GL19735-R1	GANAB	Glycan biosynthesis and metabolism: N-Glycan biosynthesis	0	0	1000	0		3.2.1.84
GL1127	Alpha 1,3-glucosidase	h2o[c] + g00010[c] -> glc[c] + g00011[c]	(GL19735-R1)	GL19735-R1	GANAB	Glycan biosynthesis and metabolism: N-Glycan biosynthesis	0	0	1000	0		3.2.1.84
GL1128	Mannosyl-oligosaccharide alpha-1,2-mannosidase	h2o[c] + g00011[c] -> man[c] + g10694[c]	(GL21852-R1) or (GL21617-R1) or (GL20698-R1) or (GL20698-R2) or (GL20848-R1) or (GL21844-R1) or (GL21844-R2) or (GL30115-R1)	GL21852-R1 GL21617-R1 GL20698-R1 GL20698-R2 GL20848-R1 GL21844-R1 GL21844-R2 GL30115-R1	(MAN1.1 or MAN1.2 or MAN1.3 or MAN1.4 or MAN1.5 or MAN1.6 or MAN1.7 or MAN1.8)	Glycan biosynthesis and metabolism: N-Glycan biosynthesis	0	0	1000	0		3.2.1.113
GL1129	Mannosyl-oligosaccharide alpha-1,2-mannosidase	g00011[c] + 4 h2o[c] -> g00012[c] + 4 man[c]	(GL21852-R1) or (GL21617-R1) or (GL20698-R1) or (GL20698-R2) or (GL20848-R1) or (GL21844-R1) or (GL21844-R2) or (GL30115-R1)	GL21852-R1 GL21617-R1 GL20698-R1 GL20698-R2 GL20848-R1 GL21844-R1 GL21844-R2 GL30115-R1	(MAN1.1 or MAN1.2 or MAN1.3 or MAN1.4 or MAN1.5 or MAN1.6 or MAN1.7 or MAN1.8)	Glycan biosynthesis and metabolism: N-Glycan biosynthesis	0	0	1000	0		3.2.1.113
GL1130	phosphatidylinositol glycan	udpnag[c] + pins[c] -> udp[c] + g00143[c]	(GL24108-R1 and GL24854-R1 and GL29391-R1 and GL21073-R1 and GL22447-R1)	GL24108-R1 GL24854-R1 GL29391-R1 GL21073-R1 GL22447-R1	(PIGA and PIGH and PIGC and PIGQ and PIGP)	Glycan biosynthesis and metabolism: Glycosylphosphatidylinositol(GPI)-anchor biosynthesis	0	0	1000	0		2.4.1.198
GL1131	N-acetylglucosaminylphosphatidylinositol deacetylase	g00143[c] + h2o[c] -> g00144[c] + ac[c]	(GL15219-R1)	GL15219-R1	PIGL	Glycan biosynthesis and metabolism: Glycosylphosphatidylinositol(GPI)-anchor biosynthesis	0	0	1000	0		3.5.1.89
GL1132	phosphatidylinositol glycan, class M	dolmanp[c] + g00145[c] -> dolp[c] + g00146[c]	(GL24601-R1)	GL24601-R1	PIGM	Glycan biosynthesis and metabolism: Glycosylphosphatidylinositol(GPI)-anchor biosynthesis	0	0	1000	0		2.3.-.-
GL1133	phosphatidylinositol glycan, class W	g00144[c] + c160coa[c] -> g00145[c] + coa[c]	(GL25426-R1)	GL25426-R1	PIGW	Glycan biosynthesis and metabolism: Glycosylphosphatidylinositol(GPI)-anchor biosynthesis	0	0	1000	0		2.3.-.-
GL1134	phosphatidylinositol glycan, class N	pe[c] + g00146[c] -> dagly[c] + g00147[c] + 3 h[c]	(GL22405-R1)	GL22405-R1	PIGN	Glycan biosynthesis and metabolism: Glycosylphosphatidylinositol(GPI)-anchor biosynthesis	0	0	1000	0		2.7.-.-
GL1135	phosphatidylinositol glycan, class V	dolmanp[c] + g00147[c] -> dolp[c] + g00148[c]	(GL16434-R1)	GL16434-R1	PIGV	Glycan biosynthesis and metabolism: Glycosylphosphatidylinositol(GPI)-anchor biosynthesis	0	0	1000	0		2.4.1.-
GL1136	phosphatidylinositol glycan, class B	dolmanp[c] + g00148[c] -> dolp[c] + g00149[c]			PIGB	Glycan biosynthesis and metabolism: Glycosylphosphatidylinositol(GPI)-anchor biosynthesis	0	0	1000	0		2.4.1.-
GL1137	phosphatidylinositol glycan, class Z	dolmanp[c] + g00149[c] -> dolp[c] + g00140[c]	(GL20526-R1)	GL20526-R1	PIGZ	Glycan biosynthesis and metabolism: Glycosylphosphatidylinositol(GPI)-anchor biosynthesis	0	0	1000	0		2.4.1.-
GL1138	phosphatidylinositol glycan	pe[c] + g00149[c] -> dagly[c] + g13044[c]	(GL21011-R1 and GL15853-R1)	GL21011-R1 GL15853-R1	(PIGF and PIGO)	Glycan biosynthesis and metabolism: Glycosylphosphatidylinositol(GPI)-anchor biosynthesis	0	0	1000	0		2.6.-.-
GL1139	ATP maintenance requirement	atp[c] + h2o[c] -> adp[c] + pi[c] + h[c]				Energy Metabolism	0	0	1000	0			NGAM
GL1140	1,3-Beta-D-glucan transport	13glucan[c] <=> 13glucan[e]				Cytoplasm membrane transport	1	-1000	1000	0
GL1141	6-Phospho-D-gluconate transport in/out via proton symport	d6pgc[c] + h[c] <=> d6pgc[e] + h[e]				Cytoplasm membrane transport	1	-1000	1000	0
GL1142	Glycogen transport	glycogen[c] <=> glycogen[e]				Cytoplasm membrane transport	1	-1000	1000	0
GL1143	Nitrate transport	hno3[c] <=> hno3[e]				Cytoplasm membrane transport	1	-1000	1000	0		2.A.1.8.5
GL1144	Acetate plasma membrane transport	ac[e] <=> ac[c]				Cytoplasm membrane transport	1	-1000	1000	0
GL1145	L-Alanine reversible transport via proton symport	ala[c] <=> ala[e]	(GL21744-R1) or (GL23088-R1) or (GL29937-R2) or (GL29937-R1) or (GL23068-R2) or (GL23068-R1)	GL21744-R1 GL23088-R1 GL29937-R2 GL29937-R1 GL23068-R2 GL23068-R1		Cytoplasm membrane transport	1	-1000	1000	0		2.A.3.10.14;19;13;17
GL1146	L-Arganine reversible transport via proton symport	arg[c] <=> arg[e]	(GL21744-R1) or (GL23088-R1) or (GL29937-R2) or (GL29937-R1) or (GL23068-R2) or (GL23068-R1)	GL21744-R1 GL23088-R1 GL29937-R2 GL29937-R1 GL23068-R2 GL23068-R1		Cytoplasm membrane transport	1	-1000	1000	0		2.A.29.9.1;2.A.3.10.14
GL1147	L-Asparagine reversible transport via proton symport	asn[e] <=> asn[c]	(GL21744-R1) or (GL23088-R1) or (GL29937-R2) or (GL29937-R1) or (GL23068-R2) or (GL23068-R1)	GL21744-R1 GL23088-R1 GL29937-R2 GL29937-R1 GL23068-R2 GL23068-R1		Cytoplasm membrane transport	1	-1000	1000	0		2.A.3.10.14;19
GL1148	L-Aspartate reversible transport via proton symport	asp[c] <=> asp[e]	(GL21744-R1) or (GL23088-R1) or (GL29937-R2) or (GL29937-R1) or (GL23068-R2) or (GL23068-R1)	GL21744-R1 GL23088-R1 GL29937-R2 GL29937-R1 GL23068-R2 GL23068-R2		Cytoplasm membrane transport	1	-1000	1000	0		2.A.3.10.14;19
GL1149	CO2 transporter via diffusion	co2[c] <=> co2[e]				Cytoplasm membrane transport	1	-1000	1000	0
GL1150	L-Cysteine reversible transport via proton symport	cys[c] <=> cys[e]	(GL21744-R1) or (GL23088-R1) or (GL29937-R2) or (GL29937-R1) or (GL23068-R2) or (GL23068-R1) or (GL19746-R1) or (GL27449-R1)	GL21744-R1 GL23088-R1 GL29937-R2 GL29937-R1 GL23068-R2 GL23068-R1 GL19746-R1 GL27449-R1		Cytoplasm membrane transport	1	-1000	1000	0		2.A.3.8.15
GL1151	D-Fructose transport	fru[e] <=> fru[c]	(GL21773-R1) or (GL22927-R1) or (GL21772-R1)	GL21773-R1 GL22927-R1 GL21772-R1		Cytoplasm membrane transport	1	-1000	1000	0		2.A.1.1.33
GL1152	Glucose-6-phosphate transport via phosphate antiport	g6p[e] + 2 pi[c] -> g6p[c] + 2 pi[e]	(GL22556-R1)	GL22556-R1		Cytoplasm membrane transport	0	0	1000	0
GL1153	D-Galactose transport in via proton symport	glac[e] -> glac[c]	(GL22344-R1) or (GL22344-R2) or (GL25452-R1)	GL22344-R1 GL22344-R2 GL25452-R1		Cytoplasm membrane transport	1	-1000	1000	0		2.A.1.1.39 2.A.1.1.51 2.A.1.1.68
GL1154	Glucose transport by via symport	glc[e] + h[e] -> glc[c] + h[c]	(GL23118-R1) or (GL26711-R1) or (GL29589-R1) or (GL22344-R1) or (GL22344-R2) or (GL25452-R1)	GL23118-R1 GL26711-R1 GL29589-R1 GL22344-R1 GL22344-R2 GL25452-R1		Cytoplasm membrane transport	0	0	1000	0		2.A.1.1.43
GL1155	L-Glutamine reversible transport via proton symport	gln[e] <=> gln[c]	(GL21744-R1) or (GL23088-R1) or (GL29937-R2) or (GL29937-R1) or (GL23068-R2) or (GL23068-R1)	GL21744-R1 GL23088-R1 GL29937-R2 GL29937-R1 GL23068-R2 GL23068-R1		Cytoplasm membrane transport	1	-1000	1000	0		2.A.3.10.14;19
GL1156	L-Glutamate transport via proton symport, reversible	glu[e] <=> glu[c]	(GL21744-R1) or (GL23088-R1) or (GL29937-R2) or (GL29937-R1) or (GL23068-R2) or (GL23068-R1)	GL21744-R1 GL23088-R1 GL29937-R2 GL29937-R1 GL23068-R2 GL23068-R1		Cytoplasm membrane transport	1	-1000	1000	0		2.A.23.1.2
GL1157	Glycine reversible transport via proton symport	gly[e] <=> gly[c]	(GL21744-R1) or (GL23088-R1) or (GL29937-R2) or (GL29937-R1) or (GL23068-R2) or (GL23068-R1) or (GL19746-R1) or (GL27449-R1)	GL21744-R1 GL23088-R1 GL29937-R2 GL29937-R1 GL23068-R2 GL23068-R1 GL19746-R1 GL27449-R1		Cytoplasm membrane transport	1	-1000	1000	0		2.A.3.10.14
GL1158	L-Histidine reversible transport via proton symport	his[e] <=> his[c]	(GL21744-R1) or (GL23088-R1) or (GL29937-R2) or (GL29937-R1) or (GL23068-R2) or (GL23068-R1)	GL21744-R1 GL23088-R1 GL29937-R2 GL29937-R1 GL23068-R2 GL23068-R1		Cytoplasm membrane transport	1	-1000	1000	0		2.A.3.10.14;19
GL1159	L-Isoleucine reversible transport via proton symport	ile[e] <=> ile[c]	(GL21744-R1) or (GL23088-R1) or (GL29937-R2) or (GL29937-R1) or (GL23068-R2) or (GL23068-R1) or (GL19746-R1) or (GL27449-R1)	GL21744-R1 GL23088-R1 GL29937-R2 GL29937-R1 GL23068-R2 GL23068-R1 GL19746-R1 GL27449-R1		Cytoplasm membrane transport	1	-1000	1000	0		2.A.3.10.14;19
GL1160	L-Leucine reversible transport via proton symport	leu[e] <=> leu[c]	(GL21744-R1) or (GL23088-R1) or (GL29937-R2) or (GL29937-R1) or (GL23068-R2) or (GL23068-R1) or (GL19746-R1) or (GL27449-R1)	GL21744-R1 GL23088-R1 GL29937-R2 GL29937-R1 GL23068-R2 GL23068-R1 GL19746-R1 GL27449-R1		Cytoplasm membrane transport	1	-1000	1000	0		2.A.3.10.14;18;19
GL1161	L-Lysine reversible transport via proton symport	lys[c] <=> lys[e]	(GL21744-R1) or (GL23088-R1) or (GL29937-R2) or (GL29937-R1) or (GL23068-R2) or (GL23068-R1) or (GL20736-R1) or (GL28933-R1) or (GL23271-R1)	GL21744-R1 GL23088-R1 GL29937-R2 GL29937-R1 GL23068-R2 GL23068-R1 GL20736-R1 GL28933-R1 GL23271-R1		Cytoplasm membrane transport	1	-1000	1000	0		2.A.3.10.10;2.A.3.1.2
GL1162	Maltose transport in via proton symport	mlt[e] <=> mlt[c]	(GL20971-R1) or (GL31406-R1)	GL20971-R1 GL31406-R1		Cytoplasm membrane transport	1	-1000	1000	0		2.A.2.6.1
GL1163	L-Methionine reversible transport via proton symport	met[e] <=> met[c]	(GL21744-R1) or (GL23088-R1) or (GL29937-R2) or (GL29937-R1) or (GL23068-R2) or (GL23068-R1) or (GL20912-R1) or (GL21051-R1) or (GL16126-R1) or (GL22815-R1) or (GL24099-R1) or (GL19746-R1) or (GL27449-R1)	GL21744-R1 GL23088-R1 GL29937-R2 GL29937-R1 GL23068-R2 GL23068-R1 GL20912-R1 GL21051-R1 GL16126-R1 GL22815-R1 GL24099-R1 GL19746-R1 GL27449-R1		Cytoplasm membrane transport	1	-1000	1000	0		2.A.3.8.4;2.A.3.10.14;19
GL1164	Ammonia reversible transport	nh3[c] <=> nh3[e]	(GL22186-R1) or (GL30450-R1)	GL22186-R1 GL30450-R1		Cytoplasm membrane transport	1	-1000	1000	0		1.A.11.3.3
GL1165	O2 transport (diffusion)	o2[c] <=> o2[e]				Cytoplasm membrane transport	1	-1000	1000	0
GL1166	L-Phenylalanine reversible transport via proton symport	phe[c] <=> phe[e]	(GL21744-R1) or (GL23088-R1) or (GL29937-R2) or (GL29937-R1) or (GL23068-R2) or (GL23068-R1) or (GL19746-R1) or (GL27449-R1)	GL21744-R1 GL23088-R1 GL29937-R2 GL29937-R1 GL23068-R2 GL23068-R1 GL19746-R1 GL27449-R1		Cytoplasm membrane transport	1	-1000	1000	0		2.A.3.10.14;18;19
GL1167	Phosphate reversible transport via symport	h[c] + pi[c] <=> h[e] + pi[e]	(GL30656-R1) or (GL25833-R1) or (GL26065-R1) or (GL23411-R1) or (GL25963-R1) or (GL25961-R1) or (GL26064-R1)	GL30656-R1 GL25833-R1 GL26065-R1 GL23411-R1 GL25963-R1 GL25961-R1 GL26064-R1		Cytoplasm membrane transport	1	-1000	1000	0		2.A.1.9.1;2.A.1.9.2
GL1168	L-Proline reversible transport via proton symport	pro[e] <=> pro[c]	(GL21744-R1) or (GL23088-R1) or (GL29937-R2) or (GL29937-R1) or (GL23068-R2) or (GL23068-R1) or (GL19300-R1)	GL21744-R1 GL23088-R1 GL29937-R2 GL29937-R1 GL23068-R2 GL23068-R1 GL19300-R1		Cytoplasm membrane transport	1	-1000	1000	0		2.A.3.10.22
GL1169	Riboflavin transport in via proton symport	ribflav[e] <=> ribflav[c]	(GL30779-R1) or (GL25006-R1) or (GL24503-R1) or (GL20131-R1) or (GL23540-R1) or (GL23703-R1) or (GL17436-R1) or (GL21332-R1) or (GL21022-R1) or (GL25002-R1) or (GL21280-R1) or (GL17440-R1) or (GL25007-R1) or (GL24502-R1) or (GL23229-R1) or (GL20932-R1) or (GL25385-R1) or (GL21581-R1) or (GL22661-R1)	GL30779-R1 GL25006-R1 GL24503-R1 GL20131-R1 GL23540-R1 GL23703-R1 GL17436-R1 GL21332-R1 GL21022-R1 GL25002-R1 GL21280-R1 GL17440-R1 GL25007-R1 GL24502-R1 GL23229-R1 GL20932-R1 GL25385-R1 GL21581-R1 GL22661-R1		Cytoplasm membrane transport	1	-1000	1000	0		2.A.1.13.4
GL1170	D-Sorbitol transport via passive diffusion	sot[c] <=> sot[e]				Cytoplasm membrane transport	1	-1000	1000	0
GL1171	L-Serine reversible transport via proton symport	ser[c] <=> ser[e]	(GL21744-R1) or (GL23088-R1) or (GL29937-R2) or (GL29937-R1) or (GL23068-R2) or (GL23068-R1) or (GL19746-R1) or (GL27449-R1)	GL21744-R1 GL23088-R1 GL29937-R2 GL29937-R1 GL23068-R2 GL23068-R1 GL19746-R1 GL27449-R1		Cytoplasm membrane transport	1	-1000	1000	0		2.A.3.10.13;14;19
GL1172	L-Threonine reversible transport via proton symport	thr[c] <=> thr[e]	(GL21744-R1) or (GL23088-R1) or (GL29937-R2) or (GL29937-R1) or (GL23068-R2) or (GL23068-R1) or (GL19746-R1) or (GL27449-R1)	GL21744-R1 GL23088-R1 GL29937-R2 GL29937-R1 GL23068-R2 GL23068-R1 GL19746-R1 GL27449-R1		Cytoplasm membrane transport	1	-1000	1000	0		2.A.3.10.14;19
GL1173	L-Tryptophan reversible transport via proton symport	trp[c] <=> trp[e]	(GL21744-R1) or (GL23088-R1) or (GL29937-R2) or (GL29937-R1) or (GL23068-R2) or (GL23068-R1) or (GL19746-R1) or (GL27449-R1)	GL21744-R1 GL23088-R1 GL29937-R2 GL29937-R1 GL23068-R2 GL23068-R1 GL19746-R1 GL27449-R1		Cytoplasm membrane transport	1	-1000	1000	0		2.A.3.10.14;18;19
GL1174	L-Tyrosine reversible transport via proton symport	tyr[c] <=> tyr[e]	(GL21744-R1) or (GL23088-R1) or (GL29937-R2) or (GL29937-R1) or (GL23068-R2) or (GL23068-R1) or (GL19746-R1) or (GL27449-R1)	GL21744-R1 GL23088-R1 GL29937-R2 GL29937-R1 GL23068-R2 GL23068-R1 GL19746-R1 GL27449-R1		Cytoplasm membrane transport	1	-1000	1000	0		2.A.18.4.2;2.A.3.10.14;18;19
GL1175	L-Valine reversible transport via proton symport	val[c] <=> val[e]	(GL21744-R1) or (GL23088-R1) or (GL29937-R2) or (GL29937-R1) or (GL23068-R2) or (GL23068-R1) or (GL19746-R1) or (GL27449-R1)	GL21744-R1 GL23088-R1 GL29937-R2 GL29937-R1 GL23068-R2 GL23068-R1 GL19746-R1 GL27449-R1		Cytoplasm membrane transport	1	-1000	1000	0		2.A.3.10.14;19
GL1176	Chitosan plasma membrane transport	chito[e] <=> chito[c]				Cytoplasm membrane transport	1	-1000	1000	0
GL1177	Chitin plasma membrane transport	chit[e] <=> chit[c]				Cytoplasm membrane transport	1	-1000	1000	0
GL1178	N-Acetyl Glucosamine reversible transport	nag[e] <=> nag[c]	(GL24286-R1) or (GL30855-R1)	GL24286-R1 GL30855-R1		Cytoplasm membrane transport	1	-1000	1000	0		2.A.1.58.1
GL1179	Multidrug resistance-associated protein 5	gsh[e] -> gsh[c]	(GL29864-R1) or (GL27256-R1) or (GL16451-R1) or (GL25544-R1) or (GL21152-R1) or (GL16452-R1)	GL29864-R1 GL27256-R1 GL16451-R1 GL25544-R1 GL21152-R1 GL16452-R1		Cytoplasm membrane transport	0	0	1000	0		2.A.67.1.5
GL1180	K+/H+ transporter	h[c] + k[e] -> h[e] + k[c]	(GL28199-R1) or (GL31246-R1)	GL28199-R1 GL31246-R1		Cytoplasm membrane transport	0	0	1000	0		2.A.37.4.1
GL1181	Na+/H+ Exchanger	na[c] + h[e] -> na[e] + h[c]	(GL19518-R1) or (GL25703-R1) or (GL20136-R1)	GL19518-R1 GL25703-R1 GL20136-R1		Cytoplasm membrane transport	0	0	1000	0		2.A.36.4.2	tcdb
GL1182	Na+/H+ Exchanger	h[c] + na[e] <=> h[e] + na[c]	(GL21279-R1) or (GL19518-R1) or (GL25703-R1) or (GL20136-R1)	GL21279-R1 GL19518-R1 GL25703-R1 GL20136-R1		Cytoplasm membrane transport	1	-1000	1000	0		2.A.36.4.1;2.A.36.1.12
GL1183	Glycerol:H symporter	h[e] + gl[e] <=> h[c] + gl[c]	(GL16154-R1) or (GL31453-R1) or (GL23173-R1) or (GL30638-R1)	GL16154-R1 GL31453-R1 GL23173-R1 GL30638-R1		Cytoplasm membrane transport	1	-1000	1000	0		2.A.1.1.73;2.A.50.1.1
GL1184	Myo-inositol transporter	ins[c] <=> ins[e]	(GL31453-R1) or (GL16154-R1) or (GL15342-R1) or (GL21866-R1) or (GL24337-R1) or (GL22354-R1) or (GL21815-R1) or (GL20600-R1) or (GL29589-R1)	GL31453-R1 GL16154-R1 GL15342-R1 GL21866-R1 GL24337-R1 GL22354-R1 GL21815-R1 GL20600-R1 GL29589-R1		Cytoplasm membrane transport	1	-1000	1000	0		2.A.1.1.63
GL1185	Sulfate transporter	slf[e] <=> slf[c]	(GL23319-R1)	GL23319-R1		Cytoplasm membrane transport	1	-1000	1000	0		2.A.53.7.1
GL1186	H2O transporter	h2o[e] <=> h2o[c]	(GL25914-R1)	GL25914-R1		Cytoplasm membrane transport	1	-1000	1000	0		1.A.8.6.2	tcdb
GL1187	Cellobiose transporter	cellob[e] <=> cellob[c]				Cytoplasm membrane transport	1	-1000	1000	0
GL1188	Na+-translocating F-type ATPase	atp[c] + h2o[c] + na[c] -> adp[c] + pi[c] + na[e]	(GL29594-R1)	GL29594-R1		Cytoplasm membrane transport	0	0	1000	0		3.A.3.9.1	tcdb
GL1189	2-amino-4-hydroxy-6-(d-erythro-1,2,3-trihydroxypropyl)-7,8-dihydropteridine transport	dhp[e] <=> dhp[c]				Cytoplasm membrane transport	1	-1000	1000	0
GL1190	pyridoxine transporter	vb6[e] <=> vb6[c]				Cytoplasm membrane transport	1	-1000	1000	0
GL1191	Trehalose transporter	tre[e] <=> tre[c]				Cytoplasm membrane transport	1	-1000	1000	0
GL1192	2Hydroxy3(4hydroxyphenyl)propenoate transporter	hhpp[c] <=> hhpp[e]				Cytoplasm membrane transport	1	-1000	1000	0
GL1193	Urea active transporter	urea[e] <=> urea[c]				Cytoplasm membrane transport	1	-1000	1000	0		2.A.21.6.1;2
GL1194	D-Mannose transport in via proton symport	man[e] <=> man[c]	(GL15342-R1) or (GL26008-R1) or (GL24337-R1) or (GL20600-R1) or (GL21728-R1)	GL15342-R1 GL26008-R1 GL24337-R1 GL20600-R1 GL21728-R1		Cytoplasm membrane transport	1	-1000	1000	0		2.A.1.1.33
GL1195	D-Xylose transport	xyl[c] <=> xyl[e]	(GL25805-R2) or (GL25805-R1) or (GL26008-R1) or (GL22354-R2) or (GL22354-R1) or (GL21498-R1)	GL25805-R2 GL25805-R1 GL26008-R1 GL22354-R2 GL22354-R1 GL21498-R1		Cytoplasm membrane transport	1	-1000	1000	0		2.A.1.1.40
GL1196	l-arabinose transporter	ara[e] <=> ara[c]	(GL26711-R1) or (GL23118-R1) or (GL21866-R1) or (GL26008-R1) or (GL24337-R1) or (GL21815-R1) or (GL29589-R1) or (GL21498-R1) or (GL22019-R1)	GL26711-R1 GL23118-R1 GL21866-R1 GL26008-R1 GL24337-R1 GL21815-R1 GL29589-R1 GL21498-R1 GL22019-R1		Cytoplasm membrane transport	1	-1000	1000	0		2.A.1.1.57
GL1197	fucose transporter	fuc[e] <=> fuc[c]				Cytoplasm membrane transport	1	-1000	1000	0
GL1198	Lrhamnose transporter	rmn[e] <=> rmn[c]				Cytoplasm membrane transport	1	-1000	1000	0
GL1199	Sucrose transporter	suc[e] <=> suc[c]				Cytoplasm membrane transport	1	-1000	1000	0
GL1200	lactose transporter	lact[e] <=> lact[c]				Cytoplasm membrane transport	1	-1000	1000	0
GL1201	D-Mannitol Transport	mnt[c] <=> mnt[e]				Cytoplasm membrane transport	1	-1000	1000	0
GL1202	Starch transporter	star[e] -> star[c]				Cytoplasm membrane transport	0	0	1000	0
GL1203	tagly exchange	tagly[e] <=> tagly[c]				Cytoplasm membrane transport	1	-1000	1000	0
GL1204	thiamin transporter	thm[e] -> thm[c]				Cytoplasm membrane transport	0	0	1000	0
GL1205	Ethanol mitochondrial membrane transport	eth[c] <=> eth[e]				Cytoplasm membrane transport	1	-1000	1000	0
GL1206	Ethanol mitochondrial membrane transport	cit[c] <=> cit[e]				Cytoplasm membrane transport	1	-1000	1000	0
GL1207	Ethanol mitochondrial membrane transport	mal[c] <=> mal[e]				Cytoplasm membrane transport	1	-1000	1000	0
GL1208	L-cysteine transporter	cys[c] <=> cys[m]				Transport, Mitochondrial Membrane	1	-1000	1000	0		2.A.3.8.15	tcdb
GL1209	2-Oxobutanoate transporter (mitochondrial)	obut[c] <=> obut[m]				Transport, Mitochondrial Membrane	1	-1000	1000	0
GL1210	3-Carboxy-4-methyl-2-oxopentanoate transport, diffusion, mitochondrial	oicap[c] <=> oicap[m]				Transport, Mitochondrial Membrane	1	-1000	1000	0
GL1211	3Mob, diffusion, mitochondrial	omval[m] <=> omval[c]				Transport, Mitochondrial Membrane	1	-1000	1000	0
GL1212	3-Methyl-2-oxopentanoate transport, diffusion, mitochondrial	3mop[c] <=> 3mop[m]				Transport, Mitochondrial Membrane	1	-1000	1000	0
GL1213	4-Methyl-2-oxopentanoate transporter (mitochondrial)	4mop[m] <=> 4mop[c]				Transport, Mitochondrial Membrane	1	-1000	1000	0
GL1214	L-2-Aminoadipate transporter (mitochondrial)	ama[m] <=> ama[c]				Transport, Mitochondrial Membrane	1	-1000	1000	0
GL1215	L-2-Aminoadipate 6-semialdehyde transporter (mitochondrial)	amasa[m] <=> amasa[c]				Transport, Mitochondrial Membrane	1	-1000	1000	0
GL1216	3-Aminopropanal transporter (mitochondrial)	aproa[m] <=> aproa[c]				Transport, Mitochondrial Membrane	1	-1000	1000	0
GL1217	ATP/ADP exchanger	adp[c] + pi[c] + atp[m] <=> atp[c] + pi[m] + adp[m]				Transport, Mitochondrial Membrane	1	-1000	1000	0
GL1218	Carbamoyl phosphate transporter (mitochondrial)	cap[m] <=> cap[c]				Transport, Mitochondrial Membrane	1	-1000	1000	0
GL1219	L-Citrulline transporter (mitochondrial)	citr[m] <=> citr[c]				Transport, Mitochondrial Membrane	1	-1000	1000	0
GL1220	3,4-Dihydroxyphenylacetaldehyde transporter (mitochondrial)	dhpacl[m] <=> dhpacl[c]				Transport, Mitochondrial Membrane	1	-1000	1000	0
GL1221	Glyoxylate transporter (mitochondrial)	glx[m] <=> glx[c]				Transport, Mitochondrial Membrane	1	-1000	1000	0
GL1222	H2O2 transporter (mitochondrial)	h2o2[m] <=> h2o2[c]				Transport, Mitochondrial Membrane	1	-1000	1000	0
GL1223	slfi transporter (mitochondrial)	slfi[c] <=> slfi[m]	(GL29336-R1) or (GL15391-R1)	GL29336-R1 GL15391-R1		Transport, Mitochondrial Membrane	1	-1000	1000	0		2.A.29.15.1
GL1224	(S)-3-Hydroxy-3-methylglutaryl-CoA transporter (mitochondrial)	h3mcoa[m] <=> h3mcoa[c]				Transport, Mitochondrial Membrane	1	-1000	1000	0
GL1225	Thiosulfate transporter (mitochondrial)	tslf[m] <=> tslf[c]				Transport, Mitochondrial Membrane	1	-1000	1000	0
GL1226	L-Homoserine transporter (mitochondrial)	hser[m] <=> hser[c]				Transport, Mitochondrial Membrane	1	-1000	1000	0
GL1227	L-Lysine transporter (mitochondrial)	lys[m] <=> lys[c]	(GL21744-R1) or (GL23088-R1) or (GL29937-R2) or (GL29937-R1) or (GL23068-R2) or (GL23068-R1) or (GL20736-R1) or (GL28933-R1) or (GL23271-R1)			Transport, Mitochondrial Membrane	1	-1000	1000	0		2.A.3.10.10
GL1228	Malonyl-CoA transporter (mitochondrial)	malcoa[m] <=> malcoa[c]				Transport, Mitochondrial Membrane	1	-1000	1000	0
GL1229	Mercaptopyruvate transporter (mitochondrial)	mpyr[m] <=> mpyr[c]				Transport, Mitochondrial Membrane	1	-1000	1000	0
GL1230	Nicotinate transporter (mitochondrial)	nica[m] <=> nica[c]				Transport, Mitochondrial Membrane	1	-1000	1000	0
GL1231	Nicotinamide transporter (mitochondrial)	nicd[m] <=> nicd[c]				Transport, Mitochondrial Membrane	1	-1000	1000	0
GL1232	O-Acetyl-L-homoserine transporter (mitochondrial)	oahser[m] <=> oahser[c]				Transport, Mitochondrial Membrane	1	-1000	1000	0
GL1233	3-Oxopropanoate transporter (mitochondrial)	opp[m] <=> opp[c]				Transport, Mitochondrial Membrane	1	-1000	1000	0
GL1234	(S)-1-Pyrroline-5-carboxylate transporter (mitochondrial)	p5c[m] <=> p5c[c]				Transport, Mitochondrial Membrane	1	-1000	1000	0
GL1235	Phenylacetate transporter (mitochondrial)	pac[m] <=> pac[c]				Transport, Mitochondrial Membrane	1	-1000	1000	0
GL1236	Phenylacetaldehyde transporter (mitochondrial)	phal[m] <=> phal[c]				Transport, Mitochondrial Membrane	1	-1000	1000	0
GL1237	Succinic semialdehyde transporter (mitochondrial)	succsal[m] <=> succsal[c]				Transport, Mitochondrial Membrane	1	-1000	1000	0
GL1238	Tetrahydrofolate transporter (mitochondrial)	thf[m] <=> thf[c]				Transport, Mitochondrial Membrane	1	-1000	1000	0
GL1239	trans-4-Hydroxy-L-proline mitochondrial transport via diffusion	hpro[c] <=> hpro[m]				Transport, Mitochondrial Membrane	1	-1000	1000	0
GL1240	5-Aminolevulinate mitochondrial transport	amievul[c] <=> amievul[m]				Transport, Mitochondrial Membrane	1	-1000	1000	0
GL1241	Aceto acetate Transport Mitochondrial	actac[c] <=> actac[m]				Transport, Mitochondrial Membrane	1	-1000	1000	0
GL1242	Acetaldehyde mitochondrial diffusion	acal[c] <=> acal[m]				Transport, Mitochondrial Membrane	1	-1000	1000	0
GL1243	Acyl carrier protein Transport Mitochondrial	acp[c] <=> acp[m]	(GL30670-R1)	GL30670-R1		Transport, Mitochondrial Membrane	1	-1000	1000	0		3.D.1.6.2
GL1244	Acetate Transport Mitochondrial	ac[c] <=> ac[m]				Transport, Mitochondrial Membrane	1	-1000	1000	0
GL1245	Alanine transport from mitochondia to cytoplasm	ala[m] <=> ala[c]				Transport, Mitochondrial Membrane	1	-1000	1000	0
GL1246	Aspartate-glutamate transporter	glu[c] + asp[m] -> asp[c] + glu[m]	(GL29937-R1) or (GL29937-R2)	GL29937-R1 GL29937-R2		Transport, Mitochondrial Membrane	0	0	1000	0		2.A.29.14.1;2.A.29.14.2
GL1247	ADP/ATP transporter, mitochondrial	adp[c] + atp[m] + h[c] -> adp[m] + atp[c] + h[m]	(GL30579-R1) or (GL26039-R1) or (GL19745-R1) or (GL25576-R1)	GL30579-R1 GL26039-R1 GL19745-R1 GL25576-R1		Transport, Mitochondrial Membrane	0	0	1000	0		2.A.29.1.7
GL1248	Citrate Transport Mitochondrial	cit[c] + mal[c] <=> mal[m] + cit[m]	(GL29336-R1) or (GL15391-R1)	GL29336-R1 GL15391-R1		Transport, Mitochondrial Membrane	1	-1000	1000	0		2.A.29.2.3
GL1249	CO2 transport (diffusion), mitochondrial	co2[c] <=> co2[m]				Transport, Mitochondrial Membrane	1	-1000	1000	0
GL1250	COA transporter (mitochondrial), irreversible	coa[c] <=> coa[m]				Transport, Mitochondrial Membrane	1	-1000	1000	0
GL1251	Dicarboxylate transport mitochondrial	mal[c] + succ[m] <=> mal[m] + succ[c]	(GL29336-R1) or (GL15391-R1)	GL29336-R1 GL15391-R1		Transport, Mitochondrial Membrane	1	-1000	1000	0		2.A.29.2.3
GL1252	D-Lactate Transport Mitochondrial	dlac[c] <=> dlac[m]				Transport, Mitochondrial Membrane	1	-1000	1000	0
GL1253	Glycine mitochondrial transport via proton symport	gly[c] <=> gly[m]				Transport, Mitochondrial Membrane	1	-1000	1000	0
GL1254	H2O Transport Mitochondrial	h2o[c] <=> h2o[m]	(GL25914-R1)	GL25914-R1		Transport, Mitochondrial Membrane	1	-1000	1000	0		1.A.8.6.2
GL1255	Isoleucine transport from mitochondria to cytosol	ile[m] <=> ile[c]				Transport, Mitochondrial Membrane	1	-1000	1000	0
GL1256	L-Lactate Transport Mitochondrial	llac[c] <=> llac[m]				Transport, Mitochondrial Membrane	1	-1000	1000	0
GL1257	Malate Transport Mitochondrial	mal[c] + pi[m] <=> pi[c] + mal[m]	(GL29336-R1) or (GL15391-R1)	GL29336-R1 GL15391-R1		Transport, Mitochondrial Membrane	1	-1000	1000	0		2.A.29.2.3
GL1258	O2 transport (diffusion)	o2[c] <=> o2[m]				Transport, Mitochondrial Membrane	1	-1000	1000	0
GL1259	Ornithine mitochondrial transport via proton antiport	orn[m] <=> orn[c]	(GL29979-R1) or (GL29979-R2) or (GL25119-R1)	GL29979-R1 GL29979-R2 GL25119-R1		Transport, Mitochondrial Membrane	1	-1000	1000	0		2.A.29.8.2;2.A.29.9.1
GL1260	Propanoyl coA Transport	ppcoa[c] <=> ppcoa[m]				Transport, Mitochondrial Membrane	1	-1000	1000	0
GL1261	L-Proline Transport Mitochondrial	pro[c] <=> pro[m]	(GL21744-R1) or (GL20736-R1) or (GL23088-R1) or (GL28933-R1) or (GL29937-R2) or (GL29937-R1) or (GL23271-R1) or (GL23068-R2) or (GL23068-R1)	GL21744-R1 GL20736-R1 GL23088-R1 GL28933-R1 GL29937-R2 GL29937-R1 GL23271-R1 GL23068-R2 GL23068-R1		Transport, Mitochondrial Membrane	1	-1000	1000	0		2.A.3.10.3
GL1262	Pyruvate mitochondrial transport via proton symport	pyr[c] <=> pyr[m]	(GL25710-R1) or (GL29960-R1)	GL25710-R1 GL29960-R1		Transport, Mitochondrial Membrane	1	-1000	1000	0		2.A.7.9.3
GL1263	Serine mitochondrial transport via proton symport	ser[c] <=> ser[m]				Transport, Mitochondrial Membrane	1	-1000	1000	0
GL1264	Succinate/fumarate mitochondrial antiporter	succ[c] + fum[m] <=> fum[c] + succ[m]	(GL22680-R1)	GL22680-R1		Transport, Mitochondrial Membrane	1	-1000	1000	0		2.A.29.13.1
GL1265	Oxaloacetate:PI antiport Mitochondrial	oaa[c] + pi[m] <=> pi[c] + oaa[m]	(GL29336-R1) or (GL15391-R1)	GL29336-R1 GL15391-R1		Transport, Mitochondrial Membrane	1	-1000	1000	0		2.A.29.2.3
GL1266	Threonine mitochondrial transport via proton symport	thr[c] <=> thr[m]				Transport, Mitochondrial Membrane	1	-1000	1000	0
GL1267	Tyrosine mitochondrial transport via proton symport	tyr[c] <=> tyr[m]				Transport, Mitochondrial Membrane	1	-1000	1000	0
GL1268	Valine reversible mitochondrial transport via proton symport	val[c] <=> val[m]				Transport, Mitochondrial Membrane	1	-1000	1000	0
GL1269	2-Oxoadipate transport out of mitochondria via diffusion	oap[m] <=> oap[c]				Transport, Mitochondrial Membrane	1	-1000	1000	0
GL1270	Leucine mitochondrial membrane transport	leu[c] <=> leu[m]				Transport, Mitochondrial Membrane	1	-1000	1000	0
GL1271	Ethanol mitochondrial membrane transport	eth[c] <=> eth[m]				Transport, Mitochondrial Membrane	1	-1000	1000	0
GL1272	4-Aminobutanal mitochondrial transport via diffusion	abutn[c] <=> abutn[m]				Transport, Mitochondrial Membrane	1	-1000	1000	0
GL1273	4-Aminobutanoate mitochondrial transport via diffusion	gaba[c] <=> gaba[m]				Transport, Mitochondrial Membrane	1	-1000	1000	0
GL1274	FAD/FMN antiport	fad[c] + fmn[m] <=> fad[m] + fmn[c]				Transport, Mitochondrial Membrane	1	-1000	1000	0
GL1275	Transport of riboflavin, mitochondrial	ribflav[c] <=> ribflav[m]				Transport, Mitochondrial Membrane	1	-1000	1000	0
GL1276	Amino acid permease (Dicarboxylic amino acid permease)	asp[m] <=> asp[c]	(GL21744-R1) or (GL20736-R1) or (GL28933-R1) or (GL29937-R2) or (GL29937-R1) or (GL23068-R1)	GL21744-R1 GL20736-R1 GL28933-R1 GL29937-R2 GL29937-R1 GL23068-R1		Transport, Mitochondrial Membrane	1	-1000	1000	0		2.A.3.10.14
GL1277	porphobilinogen transporter	ppbg[m] <=> ppbg[c]				Transport, Mitochondrial Membrane	1	-1000	1000	0
GL1278	2-oxoglutarate transporter	akg[c] <=> akg[m]	(GL22404-R1)	GL22404-R1		Transport, Mitochondrial Membrane	1	-1000	1000	0		2.A.29.2.6
GL1279	Multidrug resistance-associated protein 5	amp[c] <=> amp[m]	(GL17967-R1) or (GL21671-R1) or (GL25809-R1) or (GL20911-R1) or (GL22201-R1) or (GL22443-R1) or (GL22443-R1) or (GL22200-R1) or (GL20247-R1) or (GL15291-R1) or (GL24133-R1)	GL17967-R1 GL21671-R1 GL25809-R1 GL20911-R1 GL22201-R1 GL22443-R1 GL22443-R1 GL22200-R1 GL20247-R1 GL15291-R1 GL24133-R1		Transport, Mitochondrial Membrane	1	-1000	1000	0		3.A.1.208.15
GL1280	c100coa transporter	c100coa[c] <=> c100coa[m]				Transport, Mitochondrial Membrane	1	-1000	1000	0		4.C.1.1.1
GL1281	c40coa transporter	c40coa[c] <=> c40coa[m]				Transport, Mitochondrial Membrane	1	-1000	1000	0		4.C.1.1.1
GL1282	c60coa transporter	c60coa[c] <=> c60coa[m]				Transport, Mitochondrial Membrane	1	-1000	1000	0		4.C.1.1.1
GL1283	c80coa transporter	c80coa[c] <=> c80coa[m]				Transport, Mitochondrial Membrane	1	-1000	1000	0		4.C.1.1.1
GL1284	Mitochondrial carnitine/acylcarnitine carrier protein	car[c] <=> car[m]	(GL25231-R1) or (GL29464-R1)	GL25231-R1 GL29464-R1		Transport, Mitochondrial Membrane	1	-1000	1000	0		2.A.29.8.1;2;3;4
GL1285	Citrate transport protein	cit[m] + icit[c] <=> cit[c] + icit[m]	(GL26640-R1) or (GL27597-R1)	GL26640-R1 GL27597-R1		Transport, Mitochondrial Membrane	1	-1000	1000	0		2.A.29.7.3
GL1286	5-Deoxyadenosine transporter	dad5[m] <=> dad5[c]				Transport, Mitochondrial Membrane	1	-1000	1000	0
GL1287	Multidrug resistance-associated protein 5	gsh[c] <=> gsh[m]	(GL17967-R1) or (GL21671-R1) or (GL25809-R1) or (GL20911-R1) or (GL22201-R1) or (GL22443-R1) or (GL22443-R1) or (GL22200-R1) or (GL20247-R1) or (GL15291-R1) or (GL24133-R1)	GL17967-R1 GL21671-R1 GL25809-R1 GL20911-R1 GL22201-R1 GL22443-R1 GL22443-R1 GL22200-R1 GL20247-R1 GL15291-R1 GL24133-R1		Transport, Mitochondrial Membrane	1	-1000	1000	0		3.A.1.208.15
GL1288	K+/H+antiporters	h[c] + k[m] <=> h[m] + k[c]	(GL25606-R1)	GL25606-R1		Transport, Mitochondrial Membrane	1	-1000	1000	0		2.A.97.1.4
GL1289	Hydrochloric acid transporter	hcit[c] <=> hcit[m]				Transport, Mitochondrial Membrane	1	-1000	1000	0
GL1290	HCO3 transporter	hco3[m] <=> hco3[c]				Transport, Mitochondrial Membrane	1	-1000	1000	0
GL1291	heme transporter	heme[c] <=> heme[m]	(GL21922-R1)	GL21922-R1		Transport, Mitochondrial Membrane	1	-1000	1000	0		3.D.3.3.1
GL1292	3-Hexaprenyl-4-hydroxybenzoate transporter	hex4hyb[c] <=> hex4hyb[m]				Transport, Mitochondrial Membrane	1	-1000	1000	0
GL1293	isopentenyl diphosphate transporter	ippp[c] <=> ippp[m]				Transport, Mitochondrial Membrane	1	-1000	1000	0
GL1294	metthf transporter	metthf[c] <=> metthf[m]				Transport, Mitochondrial Membrane	1	-1000	1000	0
GL1295	The NAD+ transporter	nad[c] <=> nad[m]	(GL26775-R1) or (GL16837-R1)	GL26775-R1 GL16837-R1		Transport, Mitochondrial Membrane	1	-1000	1000	0		2.A.29.27.1;2.A.29.27.3
GL1296	The NADP transporter	nadp[c] <=> nadp[m]	(GL26775-R1) or (GL16837-R1)	GL26775-R1 GL16837-R1		Transport, Mitochondrial Membrane	1	-1000	1000	0		2.A.29.27.1;2.A.29.27.3
GL1297	n2-acetyl-l-ornithine transporter	naorn[m] <=> naorn[c]				Transport, Mitochondrial Membrane	1	-1000	1000	0
GL1298	orotate transporter	oroa[m] <=> oroa[c]				Transport, Mitochondrial Membrane	1	-1000	1000	0
GL1299	(r)-pantoate transporter	pant[m] <=> pant[c]				Transport, Mitochondrial Membrane	1	-1000	1000	0
GL1300	sulfur transporter	s[c] <=> s[m]				Transport, Mitochondrial Membrane	1	-1000	1000	0
GL1301	s-adenosyl-l-homocysteine transporter	sah[m] <=> sah[c]				Transport, Mitochondrial Membrane	1	-1000	1000	0
GL1302	sam transporter	sam[c] <=> sam[m]	(GL23715-R1)	GL23715-R1		Transport, Mitochondrial Membrane	1	-1000	1000	0		2.A.29.18.1
GL1303	s-adenosyl-4-methylthio-2-oxobutanoate transporter	samob[m] <=> samob[c]				Transport, Mitochondrial Membrane	1	-1000	1000	0
GL1304	CMP transport in/out via proton symport	cmp[c] <=> cmp[m]				Transport, Mitochondrial Membrane	1	-1000	1000	0
GL1305	Cystathione Transport	llct[c] <=> llct[m]				Transport, Mitochondrial Membrane	1	-1000	1000	0
GL1306	Mitochondrial phosphate carrier	h[c] + pi[c] -> h[m] + pi[m]	(GL23491-R1) or (GL28147-R1)	GL23491-R1 GL28147-R1		Transport, Mitochondrial Membrane	0	0	1000	0		2.A.29.4.1;2.A.29.4.3
GL1307	uracil transporter	ura[m] <=> ura[c]	(GL20717-R1)	GL20717-R1		Transport, Mitochondrial Membrane	1	-1000	1000	0
GL1308	(R,R)-Butane-2,3-diol transporter (mitochondrial)	bu23d[m] <=> bu23d[c]				Transport, Mitochondrial Membrane	1	-1000	1000	0
GL1309	3-Hydroxyisovaleryl-CoA transporter (mitochondrial)	hicoa[m] <=> hicoa[c]				Transport, Mitochondrial Membrane	1	-1000	1000	0
GL1310	(R)-Pantothenate transporter (mitochondrial)	pnto[m] <=> pnto[c]				Transport, Mitochondrial Membrane	1	-1000	1000	0
GL1311	Acetyl-COA Transporter	accoa[c] <=> accoa[m]	(GL29334-R1)	GL29334-R1		Transport, Mitochondrial Membrane	1	-1000	1000	0		2.A.1.25.1
GL1312	Phospho-D-glycerate transport in/out via proton symport	pg[c] <=> pg[m]				Transport, Mitochondrial Membrane	1	-1000	1000	0
GL1313	L-Methionine reversible transport via proton symport	met[m] <=> met[c]	(GL21744-R1) or (GL23088-R1) or (GL29937-R2) or (GL29937-R1) or (GL23068-R2) or (GL23068-R1) or (GL20912-R1) or (GL21051-R1) or (GL16126-R1) or (GL22815-R1) or (GL24099-R1) or (GL19746-R1) or (GL27449-R1)	GL21744-R1 GL23088-R1 GL29937-R2 GL29937-R1 GL23068-R2 GL23068-R1 GL20912-R1 GL21051-R1 GL16126-R1 GL22815-R1 GL24099-R1 GL19746-R1 GL27449-R1		Transport, Mitochondrial Membrane	1	-1000	1000	0		2.A.3.8.4;2.A.3.10.14;19
GL1314	Vitamin H:H symporter	h[m] + bt[m] -> h[c] + bt[c]				Transport, Mitochondrial Membrane	0	0	1000	0
GL1315	guanosine transporter	h[m] + gsn[m] <=> h[c] + gsn[c]				Transport, Mitochondrial Membrane	1	-1000	1000	0
GL1316	fadh2 exchange	fadh2[m] <=> fadh2[c]				Transport, Mitochondrial Membrane	1	-1000	1000	0
GL1317	glutamate uniporter	glu[m] <=> glu[c]	(GL30069-R1)	GL30069-R1		Transport, Mitochondrial Membrane	1	-1000	1000	0		2.A.29.14.4
ex_thm[e]	thiamin exchange	thm[e] <=>				Exchange Reaction	1	0	1000	0
ex_epm[e]	Epimelibiose exchange	epm[e] <=>				Exchange Reaction	1	0	1000	0
ex_glacgl[e]	Galactosylglycerol exchange	glacgl[e] <=>				Exchange Reaction	1	0	1000	0
ex_glacl[e]	Galactinol exchange	glacl[e] <=>				Exchange Reaction	1	0	1000	0
ex_glycogen[e]	Glycogen exchange	glycogen[e] <=>				Exchange Reaction	1	0	1000	0
ex_mann[e]	Manninotriose exchange	mann[e] <=>				Exchange Reaction	1	0	1000	0
ex_meli[e]	Melibiose exchange	meli[e] <=>				Exchange Reaction	1	0	1000	0
ex_melt[e]	Melibiitol exchange	melt[e] <=>				Exchange Reaction	1	0	1000	0
ex_raff[e]	Raffinose exchange	raff[e] <=>				Exchange Reaction	1	0	1000	0
ex_suc6p[e]	Sucrose 6-phosphate exchange	suc6p[e] <=>				Exchange Reaction	1	0	1000	0
ex_fmn[e]	FMN exchange	fmn[e] <=>				Exchange Reaction	1	0	1000	0
ex_g6p[e]	G6P Exchange	g6p[e] <=>				Exchange Reaction	1	0	1000	0
ex_chito[e]	Exchange of chitosan	chito[e] <=>				Exchange Reaction	1	0	1000	0
ex_chit[e]	Exchange of Chitin	chit[e] <=>				Exchange Reaction	1	0	1000	0
ex_d6pgc[e]	6-Phospho Gluconate Exchange	d6pgc[e] <=>				Exchange Reaction	1	0	1000	0
ex_ac[e]	Acetate exchange	ac[e] <=>				Exchange Reaction	1	0	1000	0
ex_ala[e]	D-Alanine exchange	ala[e] <=>				Exchange Reaction	1	-0.01	1000	0
ex_cys[e]	L-Cysteine exchange	cys[e] <=>				Exchange Reaction	1	-0.01	1000	0
ex_arg[e]	L-Arginine exchange	arg[e] <=>				Exchange Reaction	1	-0.01	1000	0
ex_asn[e]	L-Asparagine exchange	asn[e] <=>				Exchange Reaction	1	-0.01	1000	0
ex_asp[e]	L-Aspartate exchange	asp[e] <=>				Exchange Reaction	1	-0.01	1000	0
ex_gln[e]	L-Glutamine exchange	gln[e] <=>				Exchange Reaction	1	-0.01	1000	0
ex_glu[e]	L-Glutamate exchange	glu[e] <=>				Exchange Reaction	1	-0.01	1000	0
ex_gly[e]	Glycine exchange	gly[e] <=>				Exchange Reaction	1	-0.01	1000	0
ex_his[e]	L-Histidine exchange	his[e] <=>				Exchange Reaction	1	-0.01	1000	0
ex_ile[e]	L-Isoleucine exchange	ile[e] <=>				Exchange Reaction	1	-0.01	1000	0
ex_leu[e]	L-Leucine exchange	leu[e] <=>				Exchange Reaction	1	-0.01	1000	0
ex_lys[e]	L-Lysine exchange	lys[e] <=>				Exchange Reaction	1	-0.01	1000	0
ex_met[e]	L-Methionine exchange	met[e] <=>				Exchange Reaction	1	-0.01	1000	0
ex_phe[e]	L-Phenylalanine exchange	phe[e] <=>				Exchange Reaction	1	-0.01	1000	0
ex_pro[e]	L-Proline exchange	pro[e] <=>				Exchange Reaction	1	-0.01	1000	0
ex_ser[e]	L-Serine exchange	ser[e] <=>				Exchange Reaction	1	-0.01	1000	0
ex_thr[e]	L-Threonine exchange	thr[e] <=>				Exchange Reaction	1	-0.01	1000	0
ex_trp[e]	L-Tryptophan exchange	trp[e] <=>				Exchange Reaction	1	-0.01	1000	0
ex_tyr[e]	L-Tyrosine exchange	tyr[e] <=>				Exchange Reaction	1	-0.01	1000	0
ex_val[e]	L-Valine exchange	val[e] <=>				Exchange Reaction	1	-0.01	1000	0
ex_slf[e]	sulfate exchange	slf[e] <=>				Exchange Reaction	1	-1000	1000	0
ex_glc[e]	D-Glucose exchange	glc[e] <=>				Exchange Reaction	1	-1	1000	0
ex_h[e]	H+ exchange	h[e] <=>				Exchange Reaction	1	-1000	1000	0
ex_h2o[e]	H2O exchange	h2o[e] <=>				Exchange Reaction	1	-1000	1000	0
ex_nh3[e]	Ammonia exchange	nh3[e] <=>				Exchange Reaction	1	-1000	1000	0
ex_pi[e]	Phosphate exchange	pi[e] <=>				Exchange Reaction	1	-1000	1000	0
ex_o2[e]	O2 exchange	o2[e] <=>				Exchange Reaction	1	-1000	1000	0
ex_hno3[e]	Nitrate exchange	hno3[e] <=>				Exchange Reaction	1	0	1000	0
ex_tre[e]	Trehalose exchange	tre[e] <=>				Exchange Reaction	1	0	1000	0
ex_co2[e]	CO2 exchange	co2[e] <=>				Exchange Reaction	1	0	1000	0
ex_gl[e]	Glycerol exchange	gl[e] <=>				Exchange Reaction	1	0	1000	0
ex_nag[e]	N-Acetyl Glucosamine exchange	nag[e] <=>				Exchange Reaction	1	0	1000	0
ex_ribflav[e]	Riboflavin exchange	ribflav[e] <=>				Exchange Reaction	1	0	1000	0
ex_sot[e]	D-Sorbitol exchange	sot[e] <=>				Exchange Reaction	1	0	1000	0
ex_na[e]	Sodium exchange	na[e] <=>				Exchange Reaction	1	0	1000	0
ex_k[e]	K+ exchange	k[e] <=>				Exchange Reaction	1	0	1000	0
ex3glucan[e]	1,3-beta-D-Glucan exchange	13glucan[e] <=>				Exchange Reaction	1	0	1000	0
ex_ahtd[e]	2-amino-4-hydroxy-6-(erythro-1,2,3-trihydroxypropyl)-dihydropteridine triphosphate exchange	ahtd[e] <=>				Exchange Reaction	1	0	1000	0
ex_chib[e]	chitobiose exchange	chib[e] <=>				Exchange Reaction	1	0	1000	0
ex_dhp[e]	2-amino-4-hydroxy-6-(d-erythro-1,2,3-trihydroxypropyl)-7,8-dihydropteridine exchange	dhp[e] <=>				Exchange Reaction	1	0	1000	0
ex_gc[e]	gamma-l-glutamyl-l-cysteine exchange	gc[e] <=>				Exchange Reaction	1	0	1000	0
ex_gsh[e]	glutathione exchange	gsh[e] <=>				Exchange Reaction	1	0	1000	0
ex_hx[e]	Hydrogen halide exchange	hx[e] <=>				Exchange Reaction	1	0	1000	0
ex_rglutt[e]	R-S-Glutathione exchange	rglutt[e] <=>				Exchange Reaction	1	0	1000	0
ex_rx[e]	Organic halide exchange	rx[e] <=>				Exchange Reaction	1	0	1000	0
ex_stac[e]	stachyose exchange	stac[e] <=>				Exchange Reaction	1	0	1000	0
ex_glcna[e]	2-Keto-D-gluconate transport	glcna[e] <=>				Exchange Reaction	1	0	1000	0
ex_vb6[e]	pyridoxine exchange	vb6[e] <=>				Exchange Reaction	1	0	1000	0
ex_urea[e]	urea exchange	urea[e] <=>				Exchange Reaction	1	0	1000	0
ex_hhpp[e]	2Hydroxy3(4hydroxyphenyl)propenoate exchange	hhpp[e] <=>				Exchange Reaction	1	0	1000	0
ex_star[e]	starch(n) exchange	star[e] <=>				Exchange Reaction	1	0	1000	0
ex_cellob[e]	Cellobiose exchange	cellob[e] <=>				Exchange Reaction	1	0	1000	0
ex_fru[e]	D-Fructose exchange	fru[e] <=>				Exchange Reaction	1	0	1000	0
ex_ins[e]	myo-Inositol exchange	ins[e] <=>				Exchange Reaction	1	0	1000	0
ex_mlt[e]	Maltose exchange	mlt[e] <=>				Exchange Reaction	1	0	1000	0
ex_man[e]	D-Mannose exchange	man[e] <=>				Exchange Reaction	1	0	1000	0
ex_xyl[e]	D-Xylose exchange	xyl[e] <=>				Exchange Reaction	1	0	1000	0
ex_ara[e]	L-arabinose exchange	ara[e] <=>				Exchange Reaction	1	0	1000	0
ex_fuc[e]	fucose exchange	fuc[e] <=>				Exchange Reaction	1	0	1000	0
ex_glac[e]	aD-Galactose exchange	glac[e] <=>				Exchange Reaction	1	0	1000	0
ex_rmn[e]	LRhamnose exchange	rmn[e] <=>				Exchange Reaction	1	0	1000	0
ex_suc[e]	sucrose exchange	suc[e] <=>				Exchange Reaction	1	0	1000	0
ex_lact[e]	lactose exchange	lact[e] <=>				Exchange Reaction	1	0	1000	0
ex_mnt[e]	D-Mannitol exchange	mnt[e] <=>				Exchange Reaction	1	0	1000	0
ex_eth[e]	Ethanol exchange	eth[e] <=>				Exchange Reaction	1	0	1000	0
ex_cit[e]	Citrate exchange	cit[e] <=>				Exchange Reaction	1	0	1000	0
ex_mal[e]	(S)Malate exchange	mal[e] <=>				Exchange Reaction	1	0	1000	0
IPS	IPS synthase	0.05717 gdpman[c] + 0.05677 udpglac[c] + 0.88092 udpglc[c] + 0.0012 udpxyl[c] + 0.0004 udpara[c] + 0.00051 dtdprmn[c] + 0.00303 gdpfuc[c] + atp[c] + h2o[c] -> IPS[c] + 0.93929 udp[c] + 0.0602 gdp[c] + 0.00051 dtdp[c] + adp[c] + pi[c]				IPS fraction	0	0	1000	0
EPS	EPS transporter	IPS[c] -> EPS[e]				Cytoplasm membrane transport	0	0	1000	0
ex_EPS[e]	EPS1 exchange synthase	EPS[e] <=>				Exchange Reaction	1	0	1000	0
biomass	Biomass fraction	67.83676 atp[c] + 67.83676 h2o[c] + 0.24508 chit[c] + 0.82138 13glucan[c] + 0.23846 14glucan[c] + 0.17023 gdpman[c] + 0.27464 ala[c] + 0.11218 arg[c] + 0.08017 asn[c] + 0.22526 asp[c] + 0.01198 cys[c] + 0.09252 gln[c] + 0.31639 glu[c] + 0.26387 gly[c] + 0.06728 his[c] + 0.12305 ile[c] + 0.16114 leu[c] + 0.12599 lys[c] + 0.05496 met[c] + 0.09328 phe[c] + 0.12958 pro[c] + 0.12918 ser[c] + 0.11687 t…				Biomass fraction	0	0	1000	1

## Sheet: metabolites
Metabolite name	Metabolite description	Neutral metabolite formula	Charged metabolite formula	Metabolite charge	Metabolite Compartment	Metabolite KeggID	Metabolite PubChemID	Metabolite CheBI ID	Inchi string	Smiles
eth[c]	Ethanol	C2H6O	C2H6O	0	cytosol	C00469	3752	16236	1S/C2H6O/c123/h3H,2H2,1H3	0
nadp[c]	NADP(+)	C21H28N7O17P3	C21H25N7O17P3	-3	cytosol	C00006	3308	18009	1S/C21H28N7O17P3/c22171219(2572417)28(82612)2116(4446(33,34)35)14(30)11(4321)64148(38,39)4547(36,37)4051013(29)15(31)20(4210)273129(427)18(23)32/h14,78,1011,1316,2021,2931H,56H2,(H7,22,23,24,25,32,33,34,35,36,37,38,39)/p+1/t10,11,13,14,15,16,20,21/m1/s1	0
acal[c]	Acetaldehyde	C2H4O	C2H4O	0	cytosol	C00084	3384	15343	1S/C2H4O/c123/h2H,1H3	0
h[c]	Hydrogen	H	H+	1	cytosol	C00080	3380	49637	1S/H2/h1H	0
nadph[c]	NADPH	C21H30N7O17P3	C21H26N7O17P3	-4	cytosol	C00005	3307	16474	1S/C21H30N7O17P3/c22171219(2572417)28(82612)2116(4446(33,34)35)14(30)11(4321)64148(38,39)4547(36,37)4051013(29)15(31)20(4210)273129(427)18(23)32/h1,34,78,1011,1316,2021,2931H,2,56H2,(H2,23,32)(H,36,37)(H,38,39)(H2,22,24,25)(H2,33,34,35)/t10,11,13,14,15,16,20,21/m1/s1	0
ga3p[c]	DGlyceraldehyde 3phosphate	C3H7O6P	C3H5O6P	-2	cytosol	C00118	3418	29052	1S/C3H7O6P/c413(5)2910(6,7)8/h1,3,5H,2H2,(H2,6,7,8)/t3/m0/s1	0
nad[c]	NAD(+)	C21H27N7O14P2	C21H26N7O14P2	-1	cytosol	C00003	3305	15846	1S/C21H27N7O14P2/c22171219(2572417)28(82612)2116(32)14(30)11(4121)63944(36,37)4243(34,35)3851013(29)15(31)20(4010)273129(427)18(23)33/h14,78,1011,1316,2021,2932H,56H2,(H5,22,23,24,25,33,34,35,36,37)/p+1/t10,11,13,14,15,16,20,21/m1/s1	0
pi[c]	Orthophosphate	H3O4P	HO4P	-2	cytosol	C00009	3311	18367	1S/H3O4P/c15(2,3)4/h(H3,1,2,3,4)/p2	0
13pdg[c]	3PhosphoDglyceroyl phosphate	C3H8O10P2	C3H4O10P2	-4	cytosol	C00236	3535	16001	1S/C3H8O10P2/c42(11214(6,7)8)3(5)1315(9,10)11/h2,4H,1H2,(H2,6,7,8)(H2,9,10,11)/t2/m1/s1	0
nadh[c]	NADH	C21H29N7O14P2	C21H27N7O14P2	-2	cytosol	C00004	3306	16908	1S/C21H29N7O14P2/c22171219(2572417)28(82612)2116(32)14(30)11(4121)63944(36,37)4243(34,35)3851013(29)15(31)20(4010)273129(427)18(23)33/h1,34,78,1011,1316,2021,2932H,2,56H2,(H2,23,33)(H,34,35)(H,36,37)(H2,22,24,25)/t10,11,13,14,15,16,20,21/m1/s1	0
h2o[c]	Water	H20	H2O	0	cytosol	C00001	3303	15377	1S/H2O/h1H2	0
ac[c]	Acetate	C2H4O2	C2H3O2	-1	cytosol	C00033	3335	15366	1S/C2H4O2/c12(3)4/h1H3,(H,3,4)	0
acal[m]	Acetaldehyde	C2H4O	C2H4O	0	mitochondrion	C00084	3384	15343	1S/C2H4O/c123/h2H,1H3	0
nadp[m]	NADP(+)	C21H28N7O17P3	C21H25N7O17P3	-3	mitochondrion	C00006	3308	18009	1S/C21H28N7O17P3/c22171219(2572417)28(82612)2116(4446(33,34)35)14(30)11(4321)64148(38,39)4547(36,37)4051013(29)15(31)20(4210)273129(427)18(23)32/h14,78,1011,1316,2021,2931H,56H2,(H7,22,23,24,25,32,33,34,35,36,37,38,39)/p+1/t10,11,13,14,15,16,20,21/m1/s1	0
h2o[m]	Water	H20	H2O	0	mitochondrion	C00001	3303	15377	1S/H2O/h1H2	0
ac[m]	Acetate	C2H4O2	C2H3O2	-1	mitochondrion	C00033	3335	15366	1S/C2H4O2/c12(3)4/h1H3,(H,3,4)	0
nadph[m]	NADPH	C21H30N7O17P3	C21H26N7O17P3	-4	mitochondrion	C00005	3307	16474	1S/C21H30N7O17P3/c22171219(2572417)28(82612)2116(4446(33,34)35)14(30)11(4321)64148(38,39)4547(36,37)4051013(29)15(31)20(4210)273129(427)18(23)32/h1,34,78,1011,1316,2021,2931H,2,56H2,(H2,23,32)(H,36,37)(H,38,39)(H2,22,24,25)(H2,33,34,35)/t10,11,13,14,15,16,20,21/m1/s1	0
h[m]	Hydrogen	H	H	1	mitochondrion	C00080	3380	49637	1S/H2/h1H	0
nad[m]	NAD(+)	C21H27N7O14P2	C21H26N7O14P2	-1	mitochondrion	C00003	3305	15846	1S/C21H27N7O14P2/c22171219(2572417)28(82612)2116(32)14(30)11(4121)63944(36,37)4243(34,35)3851013(29)15(31)20(4010)273129(427)18(23)33/h14,78,1011,1316,2021,2932H,56H2,(H5,22,23,24,25,33,34,35,36,37)/p+1/t10,11,13,14,15,16,20,21/m1/s1	0
nadh[m]	NADH	C21H29N7O14P2	C21H27N7O14P2	-2	mitochondrion	C00004	3306	16908	1S/C21H29N7O14P2/c22171219(2572417)28(82612)2116(32)14(30)11(4121)63944(36,37)4243(34,35)3851013(29)15(31)20(4010)273129(427)18(23)33/h1,34,78,1011,1316,2021,2932H,2,56H2,(H2,23,33)(H,34,35)(H,36,37)(H2,22,24,25)/t10,11,13,14,15,16,20,21/m1/s1	0
pyr[m]	Pyruvate	C3H4O3	C3H3O3	-1	mitochondrion	C00022	3324	32816	1S/C3H4O3/c12(4)3(5)6/h1H3,(H,5,6)	0
coa[m]	Coenzyme A	C21H36N7O16P3S	C21H32N7O16P3S	-4	mitochondrion	C00010	3312	15346	1S/C21H36N7O16P3S/c121(2,16(31)19(32)244312(29)235648)84147(38,39)4446(36,37)4071115(4345(33,34)35)14(30)20(4211)2810271317(22)2592618(13)28/h911,1416,20,3031,48H,38H2,12H3,(H,23,29)(H,24,32)(H,36,37)(H,38,39)(H2,22,25,26)(H2,33,34,35)/t11,14,15,16+,20/m1/s1	0
accoa[m]	AcetylCoA	C23H38N7O17P3S	C23H34N7O17P3S	-4	mitochondrion	C00024	3326	15351	1S/C23H38N7O17P3S/c112(31)51762514(32)452621(35)18(34)23(2,3)94450(41,42)4749(39,40)4381317(4648(36,37)38)16(33)22(4513)3011291519(24)27102820(15)30/h1011,13,1618,22,3334H,49H2,13H3,(H,25,32)(H,26,35)(H,39,40)(H,41,42)(H2,24,27,28)(H2,36,37,38)/t13,16,17,18+,22/m1/s1	0
co2[m]	Carbon dioxide	CO2	CO2	0	mitochondrion	C00011	3313	16526	1S/CO2/c213	0
glc[c]	DGlucose	C6H12O6	C6H12O6	0	cytosol	c00031	3333	4176	0	0
atp[c]	ATP	C10H16N5O13P3	C10H12N5O13P3	-4	cytosol	C00002	3304	15422	1S/C10H16N5O13P3/c11859(132128)15(3145)107(17)6(16)4(2610)12530(21,22)2831(23,24)2729(18,19)20/h24,67,10,1617H,1H2,(H,21,22)(H,23,24)(H2,11,12,13)(H2,18,19,20)/t4,6,7,10/m1/s1	0
g6p[c]	DGlucose 6phosphate	C6H13O9P	C6H11O9P	-2	cytosol	C00092	3392	4170	1S/C6H13O9P/c732(11416(11,12)13)156(10)5(9)4(3)8/h210H,1H2,(H2,11,12,13)/t2,3,4+,5,6?/m1/s1	0
adp[c]	ADP	C10H15N5O10P2	C10H12N5O10P2	-3	cytosol	C00008	3310	16761	1S/C3H8O10P2/c42(11214(6,7)8)3(5)1315(9,10)11/h2,4H,1H2,(H2,6,7,8)(H2,9,10,11)/t2/m1/s1	0
man[c]	DMannose	C6H12O6	C6H12O6	0	cytosol	C00159	3459	16024	1S/C6H12O6/c713(9)5(11)6(12)4(10)28/h1,36,812H,2H2/t3,4,5,6/m1/s1	0
man6p[c]	DMannose 6phosphate	C6H13O9P	C6H11O9P	-2	cytosol	C00275	3572	48066	1S/C6H13O9P/c732(11416(11,12)13)156(10)5(9)4(3)8/h210H,1H2,(H2,11,12,13)/t2,3,4+,5+,6?/m1/s1	0
fru[c]	DFructose	C6H12O6	C6H12O6	0	cytosol	C00095	3395	15824	1S/C6H12O6/c7134(9)5(10)6(11,28)123/h35,711H,12H2/t3,4,5+,6?/m1/s1	0
f6p[c]	DFructose 6phosphate	C6H13O9P	C6H11O9P	-2	cytosol	C00085	3385	57579	1S/C6H13O9P/c713(8)5(10)6(11)4(9)21516(12,13)14/h47,911H,12H2,(H2,12,13,14)/p2/t4,5,6/m1/s1	0
fdp[c]	DFructose 1,6bisphosphate	C6H14O12P2	C6H10O12P2	-4	cytosol	C00354	3647	37736	1S/C6H14O12P2/c743(11619(10,11)12)186(9,5(4)8)21720(13,14)15/h35,79H,12H2,(H2,10,11,12)(H2,13,14,15)/t3,4,5+,6?/m1/s1	0
pep[c]	Phosphoenolpyruvate	C3H5O6P	C3H2O6P	-3	cytosol	C00074	3374	44897	1S/C3H5O6P/c12(3(4)5)910(6,7)8/h1H2,(H,4,5)(H2,6,7,8)	0
pyr[c]	Pyruvate	C3H4O3	C3H3O3	-1	cytosol	C00022	3324	32816	1S/C3H4O3/c12(4)3(5)6/h1H3,(H,5,6)	0
oaa[c]	Oxaloacetate	C4H4O5	C4H2O5	-2	cytosol	C00036	3338	30744	1S/C4H4O5/c52(4(8)9)13(6)7/h1H2,(H,6,7)(H,8,9)	0
co2[c]	Carbon dioxide	CO2	CO2	0	cytosol	C00011	3313	16526	1S/CO2/c213	0
t3p2[c]	Glycerone phosphate	C3H7O6P	C3H5O6P	-2	cytosol	C00111	3411	16108	1S/C3H7O6P/c413(5)2910(6,7)8/h4H,12H2,(H2,6,7,8)	0
f1p[c]	DFructose 1phosphate	C6H13O9P	C6H11O9P	-2	cytosol	C01094	4329	18105	1S/C6H13O9P/c7134(8)5(9)6(10,153)21416(11,12)13/h35,710H,12H2,(H2,11,12,13)/t3,4,5+,6?/m1/s1	0
glyal[c]	DGlyceraldehyde	C3H6O3	C3H6O3	0	cytosol	C00577	3856	17378	1S/C3H6O3/c413(6)25/h1,3,56H,2H2/t3/m0/s1	0
2pg[c]	2PhosphoDglycerate	C3H7O7P	C3H4O7P	-3	cytosol	C00631	3904	17835	1S/C3H7O7P/c412(3(5)6)1011(7,8)9/h2,4H,1H2,(H,5,6)(H2,7,8,9)/t2/m1/s1	0
udpglac[c]	UDPalphaDgalactose	C15H24N2O17P2	C15H22N2O17P2	-2	cytosol	C00052	3354	67119	1S/C15H24N2O17P2/c18358(20)10(22)12(24)14(325)3336(28,29)3435(26,27)30469(21)11(23)13(316)17217(19)1615(17)25/h12,56,814,18,2024H,34H2,(H,26,27)(H,28,29)(H,16,19,25)/t5,6,8+,9,10+,11,12,13,14/m1/s1	0
udpglc[c]	UDPglucose	C15H24N2O17P2	C15H22N2O17P2	-2	cytosol	C00029	3331	18066	1S/C15H24N2O17P2/c18358(20)10(22)12(24)14(325)3336(28,29)3435(26,27)30469(21)11(23)13(316)17217(19)1615(17)25/h12,56,814,18,2024H,34H2,(H,26,27)(H,28,29)(H,16,19,25)/t5,6,8,9,10+,11,12,13,14?/m0/s1	0
3pg[c]	3PhosphoDglycerate	C3H7O7P	C3H4O7P	-3	cytosol	C00197	3497	17794	1S/C3H7O7P/c42(3(5)6)11011(7,8)9/h2,4H,1H2,(H,5,6)(H2,7,8,9)/t2/m1/s1	0
g1p[c]	DGlucose 1phosphate	C6H13O9P	C6H11O9P	-2	cytosol	C00103	3403	29042	1S/C6H13O9P/c7123(8)4(9)5(10)6(142)1516(11,12)13/h210H,1H2,(H2,11,12,13)/t2,3,4+,5,6/m1/s1	0
coa[c]	Coenzyme A	C21H36N7O16P3S	C21H32N7O16P3S	-4	cytosol	C00010	3312	15346	1S/C21H36N7O16P3S/c121(2,16(31)19(32)244312(29)235648)84147(38,39)4446(36,37)4071115(4345(33,34)35)14(30)20(4211)2810271317(22)2592618(13)28/h911,1416,20,3031,48H,38H2,12H3,(H,23,29)(H,24,32)(H,36,37)(H,38,39)(H2,22,25,26)(H2,33,34,35)/t11,14,15,16+,20/m1/s1	0
accoa[c]	AcetylCoA	C23H38N7O17P3S	C23H34N7O17P3S	-4	cytosol	C00024	3326	15351	1S/C23H38N7O17P3S/c112(31)51762514(32)452621(35)18(34)23(2,3)94450(41,42)4749(39,40)4381317(4648(36,37)38)16(33)22(4513)3011291519(24)27102820(15)30/h1011,13,1618,22,3334H,49H2,13H3,(H,25,32)(H,26,35)(H,39,40)(H,41,42)(H2,24,27,28)(H2,36,37,38)/t13,16,17,18+,22/m1/s1	0
amp[c]	AMP	C10H14N5O7P	C10H12N5O7P	-2	cytosol	C00020	3322	16027	1S/C10H14N5O7P/c11859(132128)15(3145)107(17)6(16)4(2210)12123(18,19)20/h24,67,10,1617H,1H2,(H2,11,12,13)(H2,18,19,20)/t4,6,7,10/m1/s1	0
ppi[c]	Diphosphate	H4O7P2	HO7P2	-3	cytosol	C00013	3315	18361	1S/H4O7P2/c18(2,3)79(4,5)6/h(H2,1,2,3)(H2,4,5,6)/p4	0
atp[m]	ATP	C10H16N5O13P3	C10H12N5O13P3	-4	mitochondrion	C00002	3304	15422	1S/C10H16N5O13P3/c11859(132128)15(3145)107(17)6(16)4(2610)12530(21,22)2831(23,24)2729(18,19)20/h24,67,10,1617H,1H2,(H,21,22)(H,23,24)(H2,11,12,13)(H2,18,19,20)/t4,6,7,10/m1/s1	0
amp[m]	AMP	C10H14N5O7P	C10H12N5O7P	-2	mitochondrion	C00020	3322	16027	1S/C10H14N5O7P/c11859(132128)15(3145)107(17)6(16)4(2210)12123(18,19)20/h24,67,10,1617H,1H2,(H2,11,12,13)(H2,18,19,20)/t4,6,7,10/m1/s1	0
ppi[m]	Diphosphate	H4O7P2	HO7P2	-3	mitochondrion	C00013	3315	18361	1S/H4O7P2/c18(2,3)79(4,5)6/h(H2,1,2,3)(H2,4,5,6)/p4	0
mal[c]	(S)Malate	C4H6O5	C4H4O5	-2	cytosol	C00149	3449	30797	1S/C4H6O5/c52(4(8)9)13(6)7/h2,5H,1H2,(H,6,7)(H,8,9)/t2/m0/s1	0
mal[m]	(S)Malate	C4H6O5	C4H4O5	-2	mitochondrion	C00149	3449	30797	1S/C4H6O5/c52(4(8)9)13(6)7/h2,5H,1H2,(H,6,7)(H,8,9)/t2/m0/s1	0
icit[m]	Isocitrate	C6H8O7	C6H5O7	-3	mitochondrion	C00311	3605	30887	1S/C6H8O7/c73(8)12(5(10)11)4(9)6(12)13/h2,4,9H,1H2,(H,7,8)(H,10,11)(H,12,13)	0
akg[m]	2Oxoglutarate	C5H6O5	C5H4O5	-2	mitochondrion	C00026	3328	30915	1S/C5H6O5/c63(5(9)10)124(7)8/h12H2,(H,7,8)(H,9,10)	0
for[c]	Formate	CH2O2	CHO2	-1	cytosol	C00058	3358	15740	1S/CH2O2/c213/h1H,(H,2,3)/p1	0
oaa[m]	Oxaloacetate	C4H4O5	C4H2O5	-2	mitochondrion	C00036	3338	30744	1S/C4H4O5/c52(4(8)9)13(6)7/h1H2,(H,6,7)(H,8,9)	0
succoa[m]	SuccinylCoA	C25H40N7O19P3S	C25H35N7O19P3S	-5	mitochondrion	C00091	3391	15380	1S/C25H40N7O19P3S/c125(2,20(38)23(39)286514(33)27785516(36)4315(34)35)104854(45,46)5153(43,44)4791319(5052(40,41)42)18(37)24(4913)3212311721(26)29113022(17)32/h1113,1820,24,3738H,310H2,12H3,(H,27,33)(H,28,39)(H,34,35)(H,43,44)(H,45,46)(H2,26,29,30)(H2,40,41,42)/t13,18,19,20+,24/m1/s1	0
fadh2[m]	FADH2	C27H35N9O15P2	C27H33N9O15P2	-2	mitochondrion	C01352	4556	17877	1S/C27H35N9O15P2/c11031213(411(10)2)35(2418(3212)25(42)3427(43)3324)514(37)19(39)15(38)64852(44,45)5153(46,47)4971620(40)21(41)26(5016)369311722(28)2983023(17)36/h34,89,1416,1921,26,32,3741H,57H2,12H3,(H,44,45)(H,46,47)(H2,28,29,30)(H2,33,34,42,43)/t14,15+,16+,19,20+,21+,26+/m0/s1	0
q[m]	Ubiquinone	C49H74O4	C49H74O4	0	mitochondrion	C00399	3689	16389	0	0
qh2[m]	Ubiquinol	C49H76O4	C49H76O4	0	mitochondrion	C00390	3680	17976	0	0
fad[m]	FAD	C27H33N9O15P2	C27H31N9O15P2	-2	mitochondrion	C00016	3318	16238	1S/C27H33N9O15P2/c11031213(411(10)2)35(2418(3212)25(42)3427(43)3324)514(37)19(39)15(38)64852(44,45)5153(46,47)4971620(40)21(41)26(5016)369311722(28)2983023(17)36/h34,89,1416,1921,26,3741H,57H2,12H3,(H,44,45)(H,46,47)(H2,28,29,30)(H,34,42,43)/t14,15+,16+,19,20+,21+,26+/m0/s1	0
succ[m]	Succinate	C4H6O4	C4H4O4	-2	mitochondrion	C00042	3344	15741	1S/C4H6O4/c53(6)124(7)8/h12H2,(H,5,6)(H,7,8)	0
fum[m]	Fumarate	C4H4O4	C4H2O4	-2	mitochondrion	C00122	3422	18012	1S/C4H4O4/c53(6)124(7)8/h12H,(H,5,6)(H,7,8)/b21+	0
cit[c]	Citrate	C6H8O7	C6H5O7	-3	cytosol	C00158	3458	30769	1S/C6H8O7/c73(8)16(13,5(11)12)24(9)10/h13H,12H2,(H,7,8)(H,9,10)(H,11,12)	0
cit[m]	Citrate	C6H8O7	C6H5O7	-3	mitochondrion	C00158	3458	30769	1S/C6H8O7/c73(8)16(13,5(11)12)24(9)10/h13H,12H2,(H,7,8)(H,9,10)(H,11,12)	0
hcit[m]	(R)2Hydroxybutane1,2,4tricarboxylate	C7H10O7	C7H7O7	-3	mitochondrion	C01251	4471	52222	1S/C7H10O7/c84(9)127(14,6(12)13)35(10)11/h14H,13H2,(H,8,9)(H,10,11)(H,12,13)/t7/m1/s1	0
fgt[c]	SFormylglutathione	C11H17N3O7S	C11H16N3O7S	-1	cytosol	C01031	4274	16225	1S/C11H17N3O7S/c126(11(20)21)128(16)147(422515)10(19)1339(17)18/h57H,14,12H2,(H,13,19)(H,14,16)(H,17,18)(H,20,21)/t6,7/m0/s1	0
gsh[c]	Glutathione	C10H17N3O6S	C10H16N3O6S	-1	cytosol	C00051	3353	16856	1S/C10H17N3O6S/c115(10(18)19)127(14)136(420)9(17)1238(15)16/h56,20H,14,11H2,(H,12,17)(H,13,14)(H,15,16)(H,18,19)/t5,6/m0/s1	0
adp[m]	ADP	C10H15N5O10P2	C10H12N5O10P2	-3	mitochondrion	C00008	3310	16761	1S/C3H8O10P2/c42(11214(6,7)8)3(5)1315(9,10)11/h2,4H,1H2,(H2,6,7,8)(H2,9,10,11)/t2/m1/s1	0
pi[m]	Orthophosphate	H3O4P	HO4P	-2	mitochondrion	C00009	3311	18367	1S/H3O4P/c15(2,3)4/h(H3,1,2,3,4)/p2	0
hco3[c]	Hydrogencarbonate	H2CO3	HCO3	-1	cytosol	C00288	3583	17544	1S/CH2O3/c21(3)4/h(H2,2,3,4)/p1	0
hco3[m]	Hydrogencarbonate	H2CO3	HCO3	-1	mitochondrion	C00288	3583	17544	1S/CH2O3/c21(3)4/h(H2,2,3,4)/p1	0
d6pgc[c]	6PhosphoDgluconate	C6H13O10P	C6H10O10P	-3	cytosol	C00345	3638	48928	1S/C6H13O10P/c72(11617(13,14)15)3(8)4(9)5(10)6(11)12/h25,710H,1H2,(H,11,12)(H2,13,14,15)/t2,3,4+,5/m1/s1	0
rl5p[c]	DRibulose 5phosphate	C5H11O8P	C5H9O8P	-2	cytosol	C00199	3499	17363	1S/C5H11O8P/c613(7)5(9)4(8)21314(10,11)12/h46,89H,12H2,(H2,10,11,12)/t4,5+/m1/s1	0
d6pgl[c]	6OPhosphonoDglucono1,5lactone	C6H11O9P	C6H9O9P	-2	cytosol	C01236	4457	16938	1S/C6H11O9P/c732(11416(11,12)13)156(10)5(9)4(3)8/h25,79H,1H2,(H2,11,12,13)/t2,3,4+,5/m1/s1	0
s7p[c]	Sedoheptulose 7phosphate	C7H15O10P	C7H13O10P	-2	cytosol	C05382	7756	15721	1S/C7H15O10P/c813(9)5(11)7(13)6(12)4(10)21718(14,15)16/h48,1013H,12H2,(H2,14,15,16)/t4,5,6,7+/m1/s1	0
e4p[c]	DErythrose 4phosphate	C4H9O7P	C4H7O7P	-2	cytosol	C00279	3574	48153	1S/C4H9O7P/c513(6)4(7)21112(8,9)10/h1,34,67H,2H2,(H2,8,9,10)/t3,4+/m0/s1	0
glca[c]	DGluconate	C6H12O7	C6H11O7	-1	cytosol	C00257	3556	18391	1S/C6H12O7/c712(8)3(9)4(10)5(11)6(12)13/h25,711H,1H2,(H,12,13)/p1/t2,3,4+,5/m1/s1	0
rib[c]	DRibose	C5H10O5	C5H10O5	0	cytosol	C00121	3421	16988	1S/C5H10O5/c6123(7)4(8)5(9)102/h29H,1H2/t2,3,4,5?/m1/s1	0
r5p[c]	DRibose 5phosphate	C5H11O8P	C5H9O8P	-2	cytosol	C00117	3417	52742	1S/C5H11O8P/c632(11214(9,10)11)135(8)4(3)7/h28H,1H2,(H2,9,10,11)/t2,3,4,5?/m1/s1	0
prpp[c]	5PhosphoalphaDribose 1diphosphate	C5H13O14P3	C5H8O14P3	-5	cytosol	C00119	3419	58017	1S/C5H13O14P3/c632(11620(8,9)10)175(4(3)7)1822(14,15)1921(11,12)13/h27H,1H2,(H,14,15)(H2,8,9,10)(H2,11,12,13)/p5/t2,3,4,5/m1/s1	0
glact[c]	DGlucono1,5lactone	C6H10O6	C6H10O6	0	cytosol	C01040	3498	16217	1S/C6H10O6/c7123(8)4(9)5(10)6(11)122/h25,710H,1H2/t2,3,4+,5/m1/s1	0
xul5p[c]	DXylulose 5phosphate	C5H11O8P	C5H9O8P	-2	cytosol	C00231	3530	16332	1S/C5H11O8P/c613(7)5(9)4(8)21314(10,11)12/h46,89H,12H2,(H2,10,11,12)/p2/t4,5/m1/s1	0
acpi[c]	Acetyl phosphate	C2H5O5P	C2H3O5P	-2	cytosol	C00227	3527	15350	1S/C2H5O5P/c12(3)78(4,5)6/h1H3,(H2,4,5,6)	0
r1p[c]	DRibose 1phosphate	C5H11O8P	C5H9O8P	-2	cytosol	C00620	3894	35425	1S/C5H11O8P/c6123(7)4(8)5(122)1314(9,10)11/h28H,1H2,(H2,9,10,11)/t2,3,4,5?/m1/s1	0
xol[c]	Xylitol	C5H12O5	C5H12O5	0	cytosol	C00379	3669	17151	1S/C5H12O5/c613(8)5(10)4(9)27/h310H,12H2/t3,4+,5+	0
xul[c]	DXylulose	C5H10O5	C5H10O5	0	cytosol	C00310	3604	17140	1S/C5H10O5/c613(8)5(10)4(9)27/h3,58,10H,12H2/t3,5+/m1/s1	0
udpga[c]	UDPglucuronate	C15H22N2O18P2	C15H19N2O18P2	-3	cytosol	C00167	3467	17200	1S/C15H22N2O18P2/c1851217(15(26)165)129(22)6(19)4(3212)33136(27,28)3537(29,30)341410(23)7(20)8(21)11(3314)13(24)25/h12,4,612,14,1923H,3H2,(H,24,25)(H,27,28)(H,29,30)(H,16,18,26)/t4,6,7+,8+,9,10,11+,12,14/m1/s1	0
aol[c]	DArabinitol	C5H12O5	C5H12O5	0	cytosol	C01904	5013	18333	1S/C5H12O5/c613(8)5(10)4(9)27/h310H,12H2/t3,4/m1/s1	0
rl[c]	DRibulose	C5H10O5	C5H10O5	0	cytosol	C00309	3603	17173	1S/C5H10O5/c613(8)5(10)4(9)27/h3,58,10H,12H2/t3,5/m1/s1	0
xyl[c]	DXylose	C5H10O5	C5H10O5	0	cytosol	C00181	3481	15936	1S/C5H10O5/c613(8)5(10)4(9)27/h1,35,710H,2H2/t3,4+,5+/m0/s1	0
utp[c]	UTP	C9H15N2O15P3	C9H11N2O15P3	-4	cytosol	C00075	3375	15713	1S/C9H15N2O15P3/c1251211(9(15)105)87(14)6(13)4(248)32328(19,20)2629(21,22)2527(16,17)18/h12,4,68,1314H,3H2,(H,19,20)(H,21,22)(H,10,12,15)(H2,16,17,18)/t4,6,7,8/m1/s1	0
ribol[c]	Ribitol	C5H12O5	C5H12O5	0	cytosol	C00474	3757	48505	1S/C5H12O5/c613(8)5(10)4(9)27/h310H,12H2/t3,4+,5	0
guln[c]	gulonate	C6H12O7	C6H11O7	-1	cytosol	C00800	0	0	1S/C6H12O7/c712(8)3(9)4(10)5(11)6(12)13/h25,711H,1H2,(H,12,13)/p1/t2,3+,4,5/m0/s1	0
ga[c]	Dglucuronate	C6H10O7	C6H9O7	-1	cytosol	C00191	3491	58720	1S/C6H10O7/c712(8)4(5(10)11)136(12)3(1)9/h14,69,12H,(H,10,11)/p1/t1,2,3+,4,6?/m0/s1	0
mnt[c]	Dmannitol	C6H14O6	C6H14O6	0	cytosol	C00392	3682	16899	1S/C6H14O6/c713(9)5(11)6(12)4(10)28/h312H,12H2/t3,4,5,6/m1/s1	0
sot[c]	DSorbitol	C6H14O6	C6H14O6	0	cytosol	C00794	4052	17924	1S/C6H14O6/c713(9)5(11)6(12)4(10)28/h312H,12H2/t3,4+,5,6/m1/s1	0
mnt1p[c]	DMannitol 1phosphate	C6H15O9P	C6H13O9P	-2	cytosol	C00644	3917	16298	1S/C6H15O9P/c713(8)5(10)6(11)4(9)21516(12,13)14/h311H,12H2,(H2,12,13,14)/t3,4,5,6/m1/s1	0
rmf[c]	LRhamnofuranose	C6H12O5	C6H12O5	0	cytosol	C02431	5458	16935	1S/C6H12O5/c12(7)53(8)4(9)6(10)115/h210H,1H3/t2,3,4+,5,6?/m0/s1	0
rml[c]	LRhamnono1,4lactone	C6H10O5	C6H10O5	0	cytosol	C02991	5900	17937	1S/C6H10O5/c12(7)53(8)4(9)6(10)115/h25,79H,1H3/t2,3,4+,5/m0/s1	0
gdpddm[c]	GDP4dehydro6deoxyDmannose	C16H23N5O15P2	C16H21N5O15P2	-2	cytosol	C01222	4444	16955	1S/C16H23N5O15P2/c147(22)9(24)11(26)15(334)3538(30,31)3637(28,29)32258(23)10(25)14(345)21318612(21)1916(17)2013(6)27/h35,811,1415,2326H,2H2,1H3,(H,28,29)(H,30,31)(H3,17,19,20,27)/t4,5,8,9+,10,11+,14,15/m1/s1	0
gdpfuc[c]	GDPLfucose	C16H25N5O15P2	C16H23N5O15P2	-2	cytosol	C00325	3619	17009	1S/C16H25N5O15P2/c147(22)9(24)11(26)15(334)3538(30,31)3637(28,29)32258(23)10(25)14(345)21318612(21)1916(17)2013(6)27/h35,711,1415,2226H,2H2,1H3,(H,28,29)(H,30,31)(H3,17,19,20,27)/t4,5+,7+,8+,9+,10+,11,14+,15?/m0/s1	0
f26p[c]	DFructose 2,6bisphosphate	C6H14O12P2	C6H10O12P2	-4	cytosol	C00665	3934	28602	1S/C6H14O12P2/c726(1820(13,14)15)5(9)4(8)3(176)11619(10,11)12/h35,79H,12H2,(H2,10,11,12)(H2,13,14,15)/t3,4,5+,6+/m1/s1	0
man1p[c]	DMannose 1phosphate	C6H13O9P	C6H11O9P	-2	cytosol	C00636	3909	35374	1S/C6H13O9P/c7123(8)4(9)5(10)6(142)1516(11,12)13/h210H,1H2,(H2,11,12,13)/t2,3,4+,5+,6?/m1/s1	0
gtp[c]	GTP	C10H16N5O14P3	C10H12N5O14P3	-4	cytosol	C00044	3346	15996	1S/C10H16N5O14P3/c11101374(8(18)1410)12215(7)96(17)5(16)3(279)12631(22,23)2932(24,25)2830(19,20)21/h23,56,9,1617H,1H2,(H,22,23)(H,24,25)(H2,19,20,21)(H3,11,13,14,18)/t3,5,6,9/m1/s1	0
gdpman[c]	GDPmannose	C16H25N5O16P2	C16H23N5O16P2	-2	cytosol	C00096	3396	15820	1S/C16H25N5O16P2/c171619126(13(28)2016)18321(12)1410(26)8(24)5(3414)23338(29,30)3739(31,32)361511(27)9(25)7(23)4(122)3515/h35,711,1415,2227H,12H2,(H,29,30)(H,31,32)(H3,17,19,20,28)/t4,5,7,8,9+,10,11+,14,15/m1/s1	0
rmn[c]	Lrhamnose	C6H12O5	C6H12O5	0	cytosol	C00507	3790	16055	1S/C6H12O5/c13(8)5(10)6(11)4(9)27/h26,811H,1H3/t3,4,5,6/m0/s1	0
ladhde[c]	LLactaldehyde	C3H6O2	C3H6O2	0	cytosol	C00424	3714	18041	1S/C3H6O2/c13(5)24/h23,5H,1H3/t3/m0/s1	0
llac[c]	LLactate	C3H6O3	C3H5O3	-1	cytosol	C00186	3486	3486	1S/C3H6O3/c12(4)3(5)6/h2,4H,1H3,(H,5,6)/t2/m0/s1	0
glac[c]	Dgalactose	C6H12O6	C6H12O6	0	cytosol	C00124	3424	4139	0	0
o2[c]	Dioxygen	O2	O2	0	cytosol	C00007	3309	15379	1S/O2/c12	0
dgla[c]	DGalactonate	C6H12O7	C6H11O7	-1	cytosol	C00880	4136	16534	1S/C6H12O7/c712(8)3(9)4(10)5(11)6(12)13/h25,711H,1H2,(H,12,13)/t2,3+,4+,5/m1/s1	0
h2o2[c]	Hydrogen peroxide	H2O2	H2O2	0	cytosol	C00027	3329	16240	1S/H2O2/c12/h12H	0
gal1p[c]	alphaDGalactose 1phosphate	C6H13O9P	C6H11O9P	-2	cytosol	C00446	3734	17973	1S/C6H13O9P/c7123(8)4(9)5(10)6(142)1516(11,12)13/h210H,1H2,(H2,11,12,13)/t2,3+,4+,5,6/m1/s1	0
mlt[e]	maltose	C12H22O11	C12H22O11	0	extracellular	C00208	0	0	0	0
h2o[e]	Water	H20	H2O	0	extracellular	C00001	3303	15377	1S/H2O/h1H2	0
glc[e]	d-glucose	C6H12O6	C6H12O6	0	extracellular	C00031	3333	0	0	0
meli[e]	Melibiose	C12H22O11	C12H22O11	0	extracellular	C05402	7769	28053	1S/C12H22O11/c13135(14)8(17)10(19)12(233)21246(15)7(16)9(18)11(20)224/h320H,12H2/t3,4,5+,6,7+,8+,9,10,11?,12+/m1/s1	0
glac[e]	Dgalactose	C6H12O6	C6H12O6	0	extracellular	C00124	3424	4139	0	0
epm[e]	Epimelibiose	C12H22O11	C12H22O11	0	extracellular	C05400	7767	4808	1S/C12H22O11/c13135(14)8(17)10(19)12(233)21246(15)7(16)9(18)11(20)224/h320H,12H2/t3,4,5,6+,7+,8+,9,10+,11+,12+/m1/s1	0
man[e]	DMannose	C6H12O6	C6H12O6	0	extracellular	C00159	3459	16024	1S/C6H12O6/c713(9)5(11)6(12)4(10)28/h1,36,812H,2H2/t3,4,5,6/m1/s1	0
melt[e]	Melibiitol	C12H24O11	C12H24O11	0	extracellular	C05399	7766	27527	1S/C12H24O11/c1314(14)7(16)8(17)5(15)222369(18)10(19)11(20)12(21)236/h421H,13H2/t4,5+,6,7,8,9+,10+,11,12+/m1/s1	0
sot[e]	DSorbitol	C6H14O6	C6H14O6	0	extracellular	C00794	4052	17924	1S/C6H14O6/c713(9)5(11)6(12)4(10)28/h312H,12H2/t3,4+,5,6/m1/s1	0
mann[e]	Manninotriose	C18H32O16	C18H32O16	0	extracellular	C05404	7771	31005	1S/C18H32O16/c1915(21)9(23)10(24)6(22)3311716(30)14(28)12(26)8(3417)4321815(29)13(27)11(25)7(220)3318/h1,518,2030H,24H2/t5,6+,7+,8+,9+,10+,11,12,13,14,15+,16+,17,18/m0/s1	0
glacl[e]	Galactinol	C12H22O11	C12H22O11	0	extracellular	C01235	4456	17505	1S/C12H22O11/c13123(14)4(15)10(21)12(222)23118(19)6(17)5(16)7(18)9(11)20/h221H,1H2/t2,3+,4+,5,6,7,8+,9,10,11,12/m1/s1	0
ins[e]	Myoinositol	C6H12O6	C6H12O6	0	extracellular	C00137	3437	17268	1S/C6H12O6/c712(8)4(10)6(12)5(11)3(1)9/h112H/t1,2,3,4+,5,6	0
glacgl[e]	Galactosylglycerol	C9H18O8	C9H18O8	0	extracellular	C05401	7768	15754	1S/C9H18O8/c1014(12)31698(15)7(14)6(13)5(211)179/h415H,13H2/t4,5,6+,7+,8,9/m1/s1	0
gl[e]	Glycerol	C3H8O3	C3H8O3	0	extracellular	C00116	3416	17754	1S/C3H8O3/c413(6)25/h36H,12H2	0
raff[e]	Raffinose	C18H32O16	C18H32O16	0	extracellular	C00492	3775	16634	1S/C18H32O16/c19158(22)11(25)13(27)16(315)30379(23)12(26)14(28)17(327)3418(421)15(29)10(24)6(220)3318/h517,1929H,14H2/t5,6,7,8+,9,10,11+,12+,13,14,15+,16+,17,18+/m1/s1	0
fru[e]	DFructose	C6H12O6	C6H12O6	0	extracellular	C00095	3395	15824	1S/C6H12O6/c7134(9)5(10)6(11,28)123/h35,711H,12H2/t3,4,5+,6?/m1/s1	0
stac[e]	Stachyose	C24H42O21	C24H42O21	0	extracellular	C01613	4765	17164	1S/C24H42O21/c251610(28)14(32)17(35)21(416)393811(29)15(33)18(36)22(428)404912(30)16(34)19(37)23(439)4524(527)20(38)13(31)7(226)4424/h623,2538H,15H2/t6,7,8,9,10+,11+,12,13,14+,15+,16+,17,18,19,20+,21+,22+,23,24+/m1/s1	0
ddgla[c]	2Dehydro3deoxyDgalactonate	C6H10O6	C6H9O6	-1	cytosol	C01216	4438	17028	1S/C6H10O6/c725(10)3(8)14(9)6(11)12/h3,5,78,10H,12H2,(H,11,12)/t3,5/m1/s1	0
glycogen[c]	Glycogen	C6H10O5	C6H10O5	0	cytosol	C00182	3482	28087	0	0
mltose[c]	maltotetraose	C24H42O21	C24H42O21	0	cytosol	C02052	0	0	0	0
mltiose[c]	maltotriose	C18H32O16	C18H32O16	0	cytosol	C01835	4954	0	0	0
dolmanp[c]	Dolichyl phosphate Dmannose	C86H143O9P	C86H142O9P	-1	cytosol	C03862	6598	15809	1S/C86H143O9P/c166(2)33183467(3)35193668(4)37203869(5)39214070(6)41224271(7)43234472(8)45244673(9)47254874(10)49265075(11)51275276(12)53285477(13)55295678(14)57305879(15)59316080(16)61326281(17)63649396(91,92)958685(90)84(89)83(88)82(6587)9486/h33,35,37,39,41,43,45,47,49,51,53,55,57,59,61,8190H,1832,34,36,38,40,42,44,46,48,50,52,54,56,58,60,6265H2,117H3,(H,91,92)/p1/b6735+,6837+,6939,7041,7143,72…	0
dolp[c]	Dolichyl phosphate	C80H133O4P	C80H131O4P	-2	cytosol	C00110	3410	16214	1S/C80H133O4P/c165(2)33183466(3)35193667(4)37203868(5)39214069(6)41224270(7)43234471(8)45244672(9)47254873(10)49265074(11)51275275(12)53285476(13)55295677(14)57305878(15)59316079(16)61326280(17)63648485(81,82)83/h33,35,37,39,41,43,45,47,49,51,53,55,57,59,61,80H,1832,34,36,38,40,42,44,46,48,50,52,54,56,58,60,6264H2,117H3,(H2,81,82,83)/p2/b6635+,6737+,6839,6941,7043,7145,7247,7349,7451,7553,7655,77…	0
mannan[c]	Mannans	C6H10O5	C6H10O5	0	cytosol	C00464	3748	28808	0	0
udp[c]	UDP	C9H14N2O12P2	C9H11N2O12P2	-3	cytosol	C00015	3317	17659	1S/C9H14N2O12P2/c1251211(9(15)105)87(14)6(13)4(228)32125(19,20)2324(16,17)18/h12,4,68,1314H,3H2,(H,19,20)(H,10,12,15)(H2,16,17,18)/t4,6,7,8/m1/s1	0
14glucan[c]	1,4-alpha-d-glucan	C6H10O5	C6H10O5	0	cytosol	C00718	3984	28102	0	0
tre6p[c]	Trehalose 6phosphate	C12H23O14P	C12H21O14P	-2	cytosol	C00689	3958	18283	1S/C12H23O14P/c13135(14)7(16)9(18)11(243)261210(19)8(17)6(15)4(2512)22327(20,21)22/h319H,12H2,(H2,20,21,22)/t3,4,5,6,7+,8+,9,10,11,12/m1/s1	0
mlt[c]	maltose	C12H22O11	C12H22O11	0	cytosol	C00208	0	0	0	0
13glucan[c]	1,3BetaDglucan	C6H10O5	C6H10O5	0	cytosol	C00965	4216	37671	1S/C18H32O16/c19147(22)10(25)11(26)17(314)34159(24)6(321)3218(13(15)28)33148(23)5(220)3016(29)12(14)27/h429H,13H2/t4,5,6,7,8,9,10+,11,12,13,14+,15+,16,17+,18+/m1S/s1	0
udpxyl[c]	UDPDxylose	C14H22N2O16P2	C14H20N2O16P2	-2	cytosol	C00190	3490	57632	1S/C14H22N2O16P2/c17532813(11(22)8(5)19)3134(26,27)3233(24,25)29469(20)10(21)12(306)16217(18)1514(16)23/h12,56,813,17,1922H,34H2,(H,24,25)(H,26,27)(H,15,18,23)/p2/t5,6,8+,9,10,11,12,13/m1/s1	0
xylan[c]	Xylans	C5H8O5	C5H8O5	0	cytosol	C00707	3974	37166	0	0
tre[c]	Trehalose	C12H22O11	C12H22O11	0	cytosol	C01083	4320	27082	1S/C12H22O11/c13135(15)7(17)9(19)11(213)231210(20)8(18)6(16)4(214)2212/h320H,12H2/t3,4,5,6,7+,8+,9,10,11?,12?/m1/s1	0
star[c]	starch(n)	C48H80O40	C48H80O40	0	cytosol	C00369	0	0	0	0
dex[c]	Dextrin	C24H40O20	C24H40O20	0	cytosol	C00721	0	0	0	0
starr[c]	starch(n1)	C24H40O20	C24H40O20	0	cytosol	C00369	0	0	0	0
suc[c]	Sucrose	C12H22O11	C12H22O11	0	cytosol	C00089	3389	17992	1S/C12H22O11/c13146(16)8(18)9(19)11(214)2312(315)10(20)7(17)5(214)2212/h411,1320H,13H2/t4,5,6,7,8+,9,10+,11,12+/m1/s1	0
cellob[e]	Cellobiose	C12H22O11	C12H22O11	0	extracellular	C00185	3485	17057	1S/C12H22O11/c13135(15)6(16)9(19)12(223)23104(214)2111(20)8(18)7(10)17/h320H,12H2/t3,4,5,6+,7,8,9,10,11?,12+/m1/s1	0
cellob[c]	Cellobiose	C12H22O11	C12H22O11	0	cytosol	C00185	3485	17057	1S/C12H22O11/c13135(15)6(16)9(19)12(223)23104(214)2111(20)8(18)7(10)17/h320H,12H2/t3,4,5,6+,7,8,9,10,11?,12+/m1/s1	0
suc6p[e]	Sucrose 6phosphate	C12H23O14P	C12H21O14P	-2	extracellular	C16688	51091010	16308	1S/C12H23O14P/c13146(15)8(17)9(18)11(244)2612(314)10(19)7(16)5(2512)22327(20,21)22/h411,1319H,13H2,(H2,20,21,22)/t4,5,6,7,8+,9,10+,11,12+/m1/s1	0
g6p[e]	DGlucose 6phosphate	C6H13O9P	C6H11O9P	-2	extracellular	C00092	3392	4170	1S/C6H13O9P/c732(11416(11,12)13)156(10)5(9)4(3)8/h210H,1H2,(H2,11,12,13)/t2,3,4+,5,6?/m1/s1	0
glycogen[e]	Glycogen	C6H10O5	C6H10O5	0	extracellular	C00182	3482	28087	0	0
13glucan[e]	1,3BetaDglucan	C6H10O5	C6H10O5	0	extracellular	C00965	4216	37671	1S/C18H32O16/c19147(22)10(25)11(26)17(314)34159(24)6(321)3218(13(15)28)33148(23)5(220)3016(29)12(14)27/h429H,13H2/t4,5,6,7,8,9,10+,11,12,13,14+,15+,16,17+,18+/m1S/s1	0
cellu[e]	Cellulose	C6H10O5	C6H10O5	0	extracellular	C00760	4022	18246	0	0
cellot[e]	Cellotriose	C18H32O16	C18H32O16	0	extracellular	C06219	8465	3528	1S/C18H32O16/c19147(22)8(23)12(27)17(314)34156(321)3218(13(28)10(15)25)33145(220)3016(29)11(26)9(14)24/h429H,13H2/t4,5,6,7,8+,9,10,11,12,13,14,15,16?,17+,18+/m1/s1	0
glcnt[c]	DGlucosamine	C6H13NO5	C6H13NO5	0	cytosol	C00329	3623	47977	1S/C6H13NO5/c735(10)4(9)2(18)126(3)11/h26,811H,1,7H2/t2,3,4,5,6?/m1/s1	0
nag[c]	NAcetylDglucosamine	C8H15NO6	C8H15NO6	0	cytosol	C00140	3440	506227	1S/C8H15NO6/c13(11)957(13)6(12)4(210)158(5)14/h48,10,1214H,2H2,1H3,(H,9,11)/t4,5,6,7,8?/m1/s1	0
ga6p[c]	alphaDGlucosamine 6phosphate	C6H14NO8P	C6H13NO8P	-1	cytosol	C00352	3645	15873	1S/C6H14NO8P/c735(9)4(8)2(156(3)10)11416(11,12)13/h26,810H,1,7H2,(H2,11,12,13)/t2,3,4,5,6+/m1/s1	0
naga6p[c]	NAcetylDglucosamine 6phosphate	C8H16NO9P	C8H14NO9P	-2	cytosol	C00357	3650	15784	1S/C8H16NO9P/c13(10)957(12)6(11)4(188(5)13)21719(14,15)16/h48,1113H,2H2,1H3,(H,9,10)(H2,14,15,16)/p2/t4,5,6,7,8?/m1/s1	0
udpnag[c]	UDPNacetylalphaDglucosamine	C17H27N3O17P2	C17H25N3O17P2	-2	cytosol	C00043	3345	16264	1S/C17H27N3O17P2/c16(22)181013(26)11(24)7(421)3516(10)3639(31,32)3738(29,30)335812(25)14(27)15(348)20329(23)1917(20)28/h23,78,1016,21,2427H,45H2,1H3,(H,18,22)(H,29,30)(H,31,32)(H,19,23,28)/t7,8,10,11,12,13,14,15,16/m1/s1	0
chit[c]	Chitin	C8H13NO5	C8H13NO5	0	cytosol	C00461	3745	17029	1S/C24H41N3O16/c17(31)251318(36)20(11(529)3922(13)38)422415(279(3)33)19(37)21(12(630)4124)432314(268(2)32)17(35)16(34)10(428)4023/h1024,2830,3438H,46H2,13H3,(H,25,31)(H,26,32)(H,27,33)/t10,11,12,13,14,15,16,17,18,19,20,21,22,23+,24+/m1/s1	0
udpnacg[c]	UDPNacetyl3(1carboxyvinyl)Dglucosamine	C20H29N3O19P2	C20H26N3O19P2	-3	cytosol	C04631	7220	57771	1S/C20H29N3O19P2/c17(18(30)31)381612(218(2)25)19(409(524)14(16)28)4144(35,36)4243(33,34)3761013(27)15(29)17(3910)234311(26)2220(23)32/h34,910,1217,19,24,2729H,1,56H2,2H3,(H,21,25)(H,30,31)(H,33,34)(H,35,36)(H,22,26,32)/p3/t9,10,12,13,14,15,16,17,19?/m1/s1	0
gln[c]	LGlutamine	C5H10N2O3	C5H10N2O3	0	cytosol	C00064	3364	18050	1S/C5H10N2O3/c63(5(9)10)124(7)8/h3H,12,6H2,(H2,7,8)(H,9,10)/t3/m0/s1	0
glu[c]	LGlutamate	C5H9NO4	C5H8NO4	-1	cytosol	C00025	3327	16015	1S/C5H9NO4/c63(5(9)10)124(7)8/h3H,12,6H2,(H,7,8)(H,9,10)/t3/m0/s1	0
naga1p[c]	NAcetylalphaDglucosamine 1phosphate	C8H16NO9P	C8H14NO9P	-2	cytosol	C04256	6921	57776	1S/C8H16NO9P/c13(11)957(13)6(12)4(210)178(5)1819(14,15)16/h48,10,1213H,2H2,1H3,(H,9,11)(H2,14,15,16)/p2/t4,5,6,7,8/m1/s1	0
chit[e]	Chitin	C8H13NO5	C8H13NO5	0	extracellular	C00461	3745	17029	1S/C24H41N3O16/c17(31)251318(36)20(11(529)3922(13)38)422415(279(3)33)19(37)21(12(630)4124)432314(268(2)32)17(35)16(34)10(428)4023/h1024,2830,3438H,46H2,13H3,(H,25,31)(H,26,32)(H,27,33)/t10,11,12,13,14,15,16,17,18,19,20,21,22,23+,24+/m1/s1	0
chib[e]	N,NDiacetylchitobiose	C16H28N2O11	C16H28N2O11	0	extracellular	C01674	4818	28681	1S/C16H28N2O11/c15(21)17913(25)14(8(420)2715(9)26)291610(186(2)22)12(24)11(23)7(319)2816/h716,1920,2326H,34H2,12H3,(H,17,21)(H,18,22)/t7,8,9,10,11,12,13,14,15?,16+/m1/s1	0
nag[e]	NAcetylDglucosamine	C8H15NO6	C8H15NO6	0	extracellular	C00140	3440	506227	1S/C8H15NO6/c13(11)957(13)6(12)4(210)158(5)14/h48,10,1214H,2H2,1H3,(H,9,11)/t4,5,6,7,8?/m1/s1	0
chito[c]	Chitosan	C6H11NO4	C6H11NO4	0	cytosol	C00734	3997	16261	1S/C18H35N3O13/c19712(27)14(5(223)3016(7)29)33189(21)13(28)15(6(324)3218)34178(20)11(26)10(25)4(122)3117/h418,2229H,13,1921H2/t4,5,6,7,8,9,10,11,12,13,14,15,16,17+,18+/m1/s1	0
chito[e]	Chitosan	C6H11NO4	C6H11NO4	0	extracellular	C00734	3997	16261	1S/C18H35N3O13/c19712(27)14(5(223)3016(7)29)33189(21)13(28)15(6(324)3218)34178(20)11(26)10(25)4(122)3117/h418,2229H,13,1921H2/t4,5,6,7,8,9,10,11,12,13,14,15,16,17+,18+/m1/s1	0
ac[e]	Acetate	C2H4O2	C2H3O2	-1	extracellular	C00033	3335	15366	1S/C2H4O2/c12(3)4/h1H3,(H,3,4)	0
h[e]	Hydrogen	H	H	1	extracellular	C00080	3380	49637	1S/H2/h1H	0
nh3[c]	NH3	NH3	NH4	1	cytosol	C00014	3316	16134	1S/H3N/h1H3	0
mthgxl[c]	Methylglyoxal	C3H4O2	C3H4O2	0	cytosol	C00546	3827	17158	1S/C3H4O2/c13(5)24/h2H,1H3	0
dlald[c]	DLactaldehyde	C3H6O2	C3H6O2	0	cytosol	C00937	3714	18041	1S/C3H6O2/c13(5)24/h23,5H,1H3/t3/m0/s1	0
feri[m]	Ferricytochrome c	C42H51FeN8O6S2	C42H54FeN8O6S2	3	mitochondrion	C00125	3425	15991	0	0
llac[m]	LLactate	C3H6O3	C3H5O3	-1	mitochondrion	C00186	3486	3486	1S/C3H6O3/c12(4)3(5)6/h2,4H,1H3,(H,5,6)/t2/m0/s1	0
fero[m]	Ferrocytochrome c	C42H52FeN8O6S2	C42H54FeN8O6S2	2	mitochondrion	C00126	3426	16928	0	0
dlac[m]	DLactate	C3H6O3	C3H5O3	-1	mitochondrion	C00256	3555	16004	1S/C3H6O3/c12(4)3(5)6/h2,4H,1H3,(H,5,6)/p1/t2/m1/s1	0
aaccoa[c]	AcetoacetylCoA	C25H40N7O18P3S	C25H36N7O18P3S	-4	cytosol	C00332	3626	15345	1S/C25H40N7O18P3S/c113(33)816(35)54762715(34)452823(38)20(37)25(2,3)104753(44,45)5052(42,43)4691419(4951(39,40)41)18(36)24(4814)3212311721(26)29113022(17)32/h1112,14,1820,24,3637H,410H2,13H3,(H,27,34)(H,28,38)(H,42,43)(H,44,45)(H2,26,29,30)(H2,39,40,41)/t14,18,19,20+,24/m1/s1	0
omval[c]	(R)3Methyl2oxobutanoate	C5H8O3	C5H7O3	-1	cytosol	C00141	3441	16530	1S/C5H8O3/c13(2)4(6)5(7)8/h3H,12H3,(H,7,8)	0
ippmal[c]	AlphaIsopropylmalate	C7H12O5	C7H10O5	-2	cytosol	C02504	5516	35128	1S/C7H12O5/c14(2)7(12,6(10)11)35(8)9/h4,12H,3H2,12H3,(H,8,9)(H,10,11)/t7/m0/s1	0
glx[m]	Glyoxylate	C2H2O3	C2HO3	-1	mitochondrion	C00048	3350	16891	1S/C2H2O3/c312(4)5/h1H,(H,4,5)	0
lgt[c]	(R)SLactoylglutathione	C13H21N3O8S	C13H20N3O8S	-1	cytosol	C03451	6272	15694	1S/C13H21N3O8S/c16(17)13(24)2558(11(21)15410(19)20)169(18)327(14)12(22)23/h68,17H,25,14H2,1H3,(H,15,21)(H,16,18)(H,19,20)(H,22,23)/t6,7+,8+/m1/s1	0
malcoa[c]	MalonylCoA	C24H38N7O19P3S	C24H33N7O19P3S	-5	cytosol	C00083	3383	15531	1S/C24H38N7O19P3S/c124(2,19(37)22(38)274313(32)26565415(35)714(33)34)94753(44,45)5052(42,43)4681218(4951(39,40)41)17(36)23(4812)3111301620(25)28102921(16)31/h1012,1719,23,3637H,39H2,12H3,(H,26,32)(H,27,38)(H,33,34)(H,42,43)(H,44,45)(H2,25,28,29)(H2,39,40,41)/t12,17,18,19+,23/m1/s1	0
cccp[c]	carboxybiotin-carboxyl-carrier protein	C18H26N5O6SR2	C18H26N5O6SR2	0	cytosol	C04419	7051	0	0	0
bccp[c]	Holo[carboxylase]	C17H27N5O4SR2	C17H27N5O4SR2	0	cytosol	C06250	8489	0	0	0
h2o2[m]	Hydrogen peroxide	H2O2	H2O2	0	mitochondrion	C00027	3329	16240	1S/H2O2/c12/h12H	0
o2[m]	Dioxygen	O2	O2	0	mitochondrion	C00007	3309	15379	1S/O2/c12	0
glx[c]	Glyoxylate	C2H2O3	C2HO3	-1	cytosol	C00048	3350	16891	1S/C2H2O3/c312(4)5/h1H,(H,4,5)	0
oacoa[c]	OxalylCoA	C23H36N7O19P3S	C23H31N7O19P3S	-5	cytosol	C00313	3607	15535	1S/C23H36N7O19P3S/c123(2,16(33)19(34)264312(31)25565322(37)21(35)36)84652(43,44)4951(41,42)4571115(4850(38,39)40)14(32)20(4711)3010291317(24)2792818(13)30/h911,1416,20,3233H,38H2,12H3,(H,25,31)(H,26,34)(H,35,36)(H,41,42)(H,43,44)(H2,24,27,28)(H2,38,39,40)/t11,14,15,16+,20/m1/s1	0
frmd[c]	Formamide	CH3NO	CH3NO	0	cytosol	C00488	3771	16397	1S/CH3NO/c213/h1H,(H2,2,3)	0
oa[c]	Oxalate	C2H2O4	C2O4	-2	cytosol	C00209	3509	46904	1S/C2H2O4/c31(4)2(5)6/h(H,3,4)(H,5,6)/p1	0
prop[c]	Propanoate	C3H6O2	C3H5O2	-1	cytosol	C00163	0	0	0	0
ppcoa[c]	PropanoylCoA	C24H40N7O17P3S	C24H36N7O17P3S	-4	cytosol	C00100	3400	57392	1S/C24H40N7O17P3S/c1415(33)52872614(32)562722(36)19(35)24(2,3)104551(42,43)4850(40,41)4491318(4749(37,38)39)17(34)23(4613)3112301620(25)28112921(16)31/h1113,1719,23,3435H,410H2,13H3,(H,26,32)(H,27,36)(H,40,41)(H,42,43)(H2,25,28,29)(H2,37,38,39)/p4/t13,17,18,19+,23/m1/s1	0
prop[m]	Propanoate	C3H6O2	C3H5O2	-1	mitochondrion	C00163	0	0	0	0
ppcoa[m]	PropanoylCoA	C24H40N7O17P3S	C24H36N7O17P3S	-4	mitochondrion	C00100	3400	57392	1S/C24H40N7O17P3S/c1415(33)52872614(32)562722(36)19(35)24(2,3)104551(42,43)4850(40,41)4491318(4749(37,38)39)17(34)23(4613)3112301620(25)28112921(16)31/h1113,1719,23,3435H,410H2,13H3,(H,26,32)(H,27,36)(H,40,41)(H,42,43)(H2,25,28,29)(H2,37,38,39)/p4/t13,17,18,19+,23/m1/s1	0
ppap[c]	Propanoyl phosphate	C3H7O5P	C3H5O5P	-2	cytosol	C02876	0	0	0	0
c4hcoa[c]	(S)3HydroxybutanoylCoA	C25H42N7O18P3S	C25H38N7O18P3S	-4	cytosol	C01144	4375	57316	1S/C25H42N7O18P3S/c113(33)816(35)54762715(34)452823(38)20(37)25(2,3)104753(44,45)5052(42,43)4691419(4951(39,40)41)18(36)24(4814)3212311721(26)29113022(17)32/h1114,1820,24,33,3637H,410H2,13H3,(H,27,34)(H,28,38)(H,42,43)(H,44,45)(H2,26,29,30)(H2,39,40,41)/p4/t13,14+,18+,19+,20,24+/m0/s1	0
dac[m]	Diacetyl	C4H6O2	C4H6O2	0	mitochondrion	C00741	4004	16583	1S/C4H6O2/c13(5)4(2)6/h12H3	0
acen[m]	(R)Acetoin	C4H8O2	C4H8O2	0	mitochondrion	C00810	4068	15686	1S/C4H8O2/c13(5)4(2)6/h3,5H,12H3/t3/m1/s1	0
bu23d[m]	(R,R)Butane2,3diol	C4H10O2	C4H10O2	0	mitochondrion	C03044	5947	16982	1S/C4H10O2/c13(5)4(2)6/h36H,12H3/t3,4/m1/s1	0
succsal[c]	Succinic semialdehyde	C4H6O3	C4H5O3	-1	cytosol	C00232	3531	16265	1S/C4H6O3/c53124(6)7/h3H,12H2,(H,6,7)/p1	0
succ[c]	Succinate	C4H6O4	C4H4O4	-2	cytosol	C00042	3344	15741	1S/C4H6O4/c53(6)124(7)8/h12H2,(H,5,6)(H,7,8)	0
alac[m]	(S)2Acetolactate	C5H8O4	C5H7O4	-1	mitochondrion	C06010	8282	18409	1S/C5H8O4/c13(6)5(2,9)4(7)8/h9H,12H3,(H,7,8)/t5/m0/s1	0
h3mcoa[c]	(S)3Hydroxy3methylglutarylCoA	C27H44N7O20P3S	C27H39N7O20P3S	-5	cytosol	C00356	3649	15467	1S/C27H44N7O20P3S/c126(2,21(40)24(41)305415(35)29675817(38)927(3,42)816(36)37)115157(48,49)5456(46,47)50101420(5355(43,44)45)19(39)25(5214)3413331822(28)31123223(18)34/h1214,1921,25,3940,42H,411H2,13H3,(H,29,35)(H,30,41)(H,36,37)(H,46,47)(H,48,49)(H2,28,31,32)(H2,43,44,45)/t14,19,20,21+,25,27+/m1/s1	0
gaba[m]	4Aminobutanoate	C4H9NO2	C4H9NO2	0	mitochondrion	C00334	3628	59888	1/C4H9NO2/c53124(6)7/h13,5H2,(H,6,7)/p1/fC4H8NO2/q1	0
succsal[m]	Succinic semialdehyde	C4H6O3	C4H5O3	-1	mitochondrion	C00232	3531	16265	1S/C4H6O3/c53124(6)7/h3H,12H2,(H,6,7)/p1	0
glu[m]	LGlutamate	C5H9NO4	C5H8NO4	-1	mitochondrion	C00025	3327	16015	1S/C5H9NO4/c63(5(9)10)124(7)8/h3H,12,6H2,(H,7,8)(H,9,10)/t3/m0/s1	0
actac[m]	Acetoacetate	C4H6O3	C4H5O3	-1	mitochondrion	C00164	3464	13705	1S/C4H6O3/c13(5)24(6)7/h2H2,1H3,(H,6,7)/p1	0
aaccoa[m]	AcetoacetylCoA	C25H40N7O18P3S	C25H36N7O18P3S	-4	mitochondrion	C00332	3626	15345	1S/C25H40N7O18P3S/c113(33)816(35)54762715(34)452823(38)20(37)25(2,3)104753(44,45)5052(42,43)4691419(4951(39,40)41)18(36)24(4814)3212311721(26)29113022(17)32/h1112,14,1820,24,3637H,410H2,13H3,(H,27,34)(H,28,38)(H,42,43)(H,44,45)(H2,26,29,30)(H2,39,40,41)/t14,18,19,20+,24/m1/s1	0
h3mcoa[m]	(S)3Hydroxy3methylglutarylCoA	C27H44N7O20P3S	C27H39N7O20P3S	-5	mitochondrion	C00356	3649	15467	1S/C27H44N7O20P3S/c126(2,21(40)24(41)305415(35)29675817(38)927(3,42)816(36)37)115157(48,49)5456(46,47)50101420(5355(43,44)45)19(39)25(5214)3413331822(28)31123223(18)34/h1214,1921,25,3940,42H,411H2,13H3,(H,29,35)(H,30,41)(H,36,37)(H,46,47)(H,48,49)(H2,28,31,32)(H2,43,44,45)/t14,19,20,21+,25,27+/m1/s1	0
c4dcoa[c]	CrotonoylCoA	C25H40N7O17P3S	C25H36N7O17P3S	-4	cytosol	C00877	4133	57332	1S/C25H40N7O17P3S/c14516(34)53982715(33)672823(37)20(36)25(2,3)114652(43,44)4951(41,42)45101419(4850(38,39)40)18(35)24(4714)3213311721(26)29123022(17)32/h45,1214,1820,24,3536H,611H2,13H3,(H,27,33)(H,28,37)(H,41,42)(H,43,44)(H2,26,29,30)(H2,38,39,40)/p4/b54+/t14,18,19,20?,24/m1/s1	0
ins[c]	Myoinositol	C6H12O6	C6H12O6	0	cytosol	C00137	3437	17268	1S/C6H12O6/c712(8)4(10)6(12)5(11)3(1)9/h112H/t1,2,3,4+,5,6	0
pins[c]	1Phosphatidyl1Dmyoinositols	C11H17O13PR2	C11H16O13PR2	-1	cytosol	C01194	4419	16749	0	0
pinsp[c]	1Phosphatidyl1Dmyoinositol 3phosphates	C11H18O16P2R2	C11H18O16P2R2	0	cytosol	C04549	7155	17283	0	0
pyi35bp[c]	Phosphatidyl1Dmyoinositol 3,5bisphosphate	C11H24O19P3R2	C11H19O19P3R2	-5	cytosol	C11556	13721	16152	0	0
tpi[c]	1DMyoinositol 1,4,5trisphosphate	C6H15O15P3	C6H9O15P3	-6	cytosol	C01245	4466	16595	1S/C6H15O15P3/c712(8)5(2023(13,14)15)6(2124(16,17)18)3(9)4(1)1922(10,11)12/h19H,(H2,10,11,12)(H2,13,14,15)(H2,16,17,18)/t1,2+,3+,4,5,6/m1/s1	0
tkpi[c]	1DmyoInositol 1,4,5,6tetrakisphosphate	C6H16O18P4	C6H8O18P4	-8	cytosol	C11555	13722	57627	1S/C6H16O18P4/c712(8)4(2226(12,13)14)6(2428(18,19)20)5(2327(15,16)17)3(1)2125(9,10)11/h18H,(H2,9,10,11)(H2,12,13,14)(H2,15,16,17)(H2,18,19,20)/p8/t1,2+,3,4,5+,6+/m1/s1	0
pkpi[c]	1DmyoInositol 1,3,4,5,6pentakisphosphate	C6H17O21P5	C6H7O21P5	-10	cytosol	C01284	4503	57733	1S/C6H17O21P5/c712(2328(8,9)10)4(2530(14,15)16)6(2732(20,21)22)5(2631(17,18)19)3(1)2429(11,12)13/h17H,(H2,8,9,10)(H2,11,12,13)(H2,14,15,16)(H2,17,18,19)(H2,20,21,22)/p10/t1,2+,3,4,5+,6+	0
pha[c]	Phytate	C6H18O24P6	C6H6O24P6	-12	cytosol	C01204	4428	58130	1S/C6H18O24P6/c731(8,9)2512(2632(10,11)12)4(2834(16,17)18)6(3036(22,23)24)5(2935(19,20)21)3(1)2733(13,14)15/h16H,(H2,7,8,9)(H2,10,11,12)(H2,13,14,15)(H2,16,17,18)(H2,19,20,21)(H2,22,23,24)/p12/t1,2,3,4+,5,6	0
pins4p[c]	1Phosphatidyl1Dmyoinositol 4phosphates	C11H18O16P2R2	C11H18O16P2R2	0	cytosol	C01277	4496	17526	0	0
d45pi[c]	1Phosphatidyl1Dmyoinositol 4,5bisphosphates	C11H19O19P3R2	C11H14O19P3R2	-5	cytosol	C04637	7226	18348	0	0
mi4p[c]	1DMyoinositol 4phosphate	C6H13O9P	C6H11O9P	-2	cytosol	C03546	6349	18384	1S/C6H13O9P/c712(8)4(10)6(5(11)3(1)9)1516(12,13)14/h111H,(H2,12,13,14)/p2/t1,2,3,4+,5,6/m0/s1	0
mi3p[c]	1DMyoinositol 3phosphate	C6H13O9P	C6H11O9P	-2	cytosol	C04006	6716	18169	1S/C6H13O9P/c712(8)4(10)6(5(11)3(1)9)1516(12,13)14/h111H,(H2,12,13,14)/p2/t1,2,3+,4,5,6/m0/s1	0
mi1p[c]	1DMyoinositol 1phosphate	C6H13O9P	C6H11O9P	-2	cytosol	C01177	4404	18297	1S/C6H13O9P/c712(8)4(10)6(5(11)3(1)9)1516(12,13)14/h111H,(H2,12,13,14)/p2/t1,2,3+,4,5,6/m1/s1	0
myobispi[c]	1DMyoinositol 1,4bisphosphate	C6H14O12P2	C6H10O12P2	-4	cytosol	C01220	4442	17816	1S/C6H14O12P2/c712(8)6(1820(14,15)16)4(10)3(9)5(1)1719(11,12)13/h110H,(H2,11,12,13)(H2,14,15,16)/t1,2,3,4+,5+,6+/m1/s1	0
dagly[c]	1,2Diacylsnglycerol	C40.05H75.05O5	C40.05H75.05O5	0	cytosol	C00641	3465	17815	0	0
udpara[c]	UDP-L-arabinose	C14H22N2O16P2	C14H20N2O16P2	-2	cytosol	C00935	4187	17983	0	0
akg[c]	2Oxoglutarate	C5H6O5	C5H4O5	-2	cytosol	C00026	3328	30915	1S/C5H6O5/c63(5(9)10)124(7)8/h12H2,(H,7,8)(H,9,10)	0
asp[c]	LAspartate	C4H7NO4	C4H6NO4	-1	cytosol	C00049	3351	29991	1S/C4H7NO4/c52(4(8)9)13(6)7/h2H,1,5H2,(H,6,7)(H,8,9)/p1/t2/m0/s1	0
cap[c]	Carbamoyl phosphate	CH4NO5P	CH2NO5P	-2	cytosol	C00169	3469	17672	1S/CH4NO5P/c21(3)78(4,5)6/h(H2,2,3)(H2,4,5,6)	0
caasp[c]	NCarbamoylLaspartic acid	C5H8N2O5	C5H6N2O5	-2	cytosol	C00438	3727	15859	1S/C5H8N2O5/c65(12)72(4(10)11)13(8)9/h2H,1H2,(H,8,9)(H,10,11)(H3,6,7,12)/t2/m0/s1	0
pram[c]	5PhosphobetaDribosylamine	C5H12NO7P	C5H11NO7P	-1	cytosol	C03090	5988	37737	1S/C5H12NO7P/c654(8)3(7)2(135)11214(9,10)11/h25,78H,1,6H2,(H2,9,10,11)/t2,3,4,5/m1/s1	0
ala[m]	LAlanine	C3H7NO2	C3H7NO2	0	mitochondrion	C00041	3343	16977	1S/C3H7NO2/c12(4)3(5)6/h2H,4H2,1H3,(H,5,6)/t2/m0/s1	0
asn[c]	LAsparagine	C4H8N2O3	C4H8N2O3	0	cytosol	C00152	3452	17196	1S/C4H8N2O3/c52(4(8)9)13(6)7/h2H,1,5H2,(H2,6,7)(H,8,9)/t2/m0/s1	0
argsucc[c]	(N(omega)Larginino)succinic acid	C10H18N4O6	C10H17N4O6	-1	cytosol	C03406	6235	15682	1S/C10H18N4O6/c115(8(17)18)2131310(12)146(9(19)20)47(15)16/h56H,14,11H2,(H,15,16)(H,17,18)(H,19,20)(H3,12,13,14)/t5,6?/m0/s1	0
arg[c]	LArginine	C6H14N4O2	C6H15N4O2	1	cytosol	C00062	3362	16467	1S/C6H14N4O2/c74(5(11)12)213106(8)9/h4H,13,7H2,(H,11,12)(H4,8,9,10)/t4/m0/s1	0
fum[c]	Fumarate	C4H4O4	C4H2O4	-2	cytosol	C00122	3422	18012	1S/C4H4O4/c53(6)124(7)8/h12H,(H,5,6)(H,7,8)/b21+	0
asuc[c]	N6(1,2Dicarboxyethyl)AMP	C14H18N5O11P	C14H14N5O11P	-4	cytosol	C03794	6543	15919	1S/C14H18N5O11P/c207(21)15(14(24)25)1811812(1631511)19(4178)1310(23)9(22)6(3013)22931(26,27)28/h36,910,13,2223H,12H2,(H,20,21)(H,24,25)(H,15,16,18)(H2,26,27,28)/t5?,6,9,10,13/m1/s1	0
saicar[c]	1(5'Phosphoribosyl)5amino4(Nsuccinocarboxamide)imidazole	C13H19N4O12P	C13H15N4O12P	-4	cytosol	C04823	7384	18319	1S/C13H19N4O12P/c14107(11(22)164(13(23)24)16(18)19)15317(10)129(21)8(20)5(2912)22830(25,26)27/h35,89,12,2021H,12,14H2,(H,16,22)(H,18,19)(H,23,24)(H2,25,26,27)/t4?,5,8,9,12/m1/s1	0
aicar[c]	1(5Phosphoribosyl)5amino4imidazolecarboxamide	C9H15N4O8P	C9H13N4O8P	-2	cytosol	C04677	7258	18406	1S/C9H15N4O8P/c1074(8(11)16)12213(7)96(15)5(14)3(219)12022(17,18)19/h23,56,9,1415H,1,10H2,(H2,11,16)(H2,17,18,19)/t3,5,6,9/m1/s1	0
imp[c]	IMP	C10H13N4O8P	C10H11N4O8P	-2	cytosol	C00130	3430	17202	1S/C10H13N4O8P/c1564(12123(18,19)20)2210(7(6)16)1431358(14)112129(5)17/h24,67,10,1516H,1H2,(H,11,12,17)(H2,18,19,20)/t4,6,7,10/m1/s1	0
gdp[c]	GDP	C10H15N5O11P2	C10H12N5O11P2	-3	cytosol	C00035	3337	17552	1S/C10H15N5O11P2/c11101374(8(18)1410)12215(7)96(17)5(16)3(259)12428(22,23)2627(19,20)21/h23,56,9,1617H,1H2,(H,22,23)(H2,19,20,21)(H3,11,13,14,18)/t3,5,6,9/m1/s1	0
citr[c]	LCitrulline	C6H13N3O3	C6H13N3O3	0	cytosol	C00327	3621	16349	1S/C6H13N3O3/c74(5(10)11)21396(8)12/h4H,13,7H2,(H,10,11)(H3,8,9,12)/t4/m0/s1	0
car[c]	Carnitine	C7H16NO3	C7H16NO3	0	cytosol	C00487	3770	3424	1S/C7H15NO3/c18(2,3)56(9)47(10)11/h6,9H,45H2,13H3/p+1	0
acar[c]	OAcetylcarnitine	C9H18NO4	C9H18NO4	0	cytosol	C02571	5567	15960	1S/C9H17NO4/c17(11)148(59(12)13)610(2,3)4/h8H,56H2,14H3/p+1/t8/m1/s1	0
acar[m]	OAcetylcarnitine	C9H18NO4	C9H18NO4	0	mitochondrion	C02571	5567	15960	1S/C9H17NO4/c17(11)148(59(12)13)610(2,3)4/h8H,56H2,14H3/p+1/t8/m1/s1	0
car[m]	Carnitine	C7H16NO3	C7H16NO3	0	mitochondrion	C00487	3770	3424	1S/C7H15NO3/c18(2,3)56(9)47(10)11/h6,9H,45H2,13H3/p+1	0
all[c]	LAllothreonine	C4H9NO3	C4H9NO3	0	cytosol	C05519	7864	28718	1S/C4H9NO3/c12(6)3(5)4(7)8/h23,6H,5H2,1H3,(H,7,8)/t2,3/m0/s1	0
aaac[c]	L2Aminoacetoacetate	C4H7NO3	C4H7NO3	0	cytosol	C03508	6318	16944	1S/C4H7NO3/c12(6)3(5)4(7)8/h3H,5H2,1H3,(H,7,8)/t3/m0/s1	0
g[c]	DGlycerate	C3H6O4	C3H5O4	-1	cytosol	C00258	3557	32398	1S/C3H6O4/c412(5)3(6)7/h2,45H,1H2,(H,6,7)/p1/t2/m1/s1	0
hpyr[c]	Hydroxypyruvate	C3H4O4	C3H3O4	-1	cytosol	C00168	3468	30841	1S/C3H4O4/c412(5)3(6)7/h4H,1H2,(H,6,7)/p1	0
php[c]	3Phosphonooxypyruvate	C3H5O7P	C3H2O7P	-3	cytosol	C03232	6103	30933	1S/C3H5O7P/c42(3(5)6)11011(7,8)9/h1H2,(H,5,6)(H2,7,8,9)	0
aacn[c]	Aminoacetone	C3H7NO	C3H8NO	1	cytosol	C01888	5001	17906	1S/C3H7NO/c13(5)24/h2,4H2,1H3/p+1	0
gly[c]	LGlycine	C2H5NO2	C2H5NO2	0	cytosol	C00037	3339	15428	1S/C2H5NO2/c312(4)5/h1,3H2,(H,4,5)	0
metthf[m]	(6R)5,10Methylenetetrahydrofolate	C20H23N7O6	C20H21N7O6	-2	mitochondrion	C00143	3443	1989	1S/C20H23N7O6/c2120241615(18(31)2520)27926(812(27)72216)113110(2411)17(30)2313(19(32)33)5614(28)29/h14,1213H,59H2,(H,23,30)(H,28,29)(H,32,33)(H4,21,22,24,25,31)/t12,13+/m1/s1	0
nh3[m]	NH3	NH3	NH4	1	mitochondrion	C00014	3316	16134	1S/H3N/h1H3	0
gly[m]	LGlycine	C2H5NO2	C2H5NO2	0	mitochondrion	C00037	3339	15428	1S/C2H5NO2/c312(4)5/h1,3H2,(H,4,5)	0
thf[m]	Tetrahydrofolate	C19H23N7O6	C19H21N7O6	-2	mitochondrion	C00101	3401	15635	1S/C19H23N7O6/c2019251514(17(30)2619)2311(82215)72110319(2410)16(29)2412(18(31)32)5613(27)28/h14,1112,21,23H,58H2,(H,24,29)(H,27,28)(H,31,32)(H4,20,22,25,26,30)/t11,12/m0/s1	0
thf[c]	Tetrahydrofolate	C19H23N7O6	C19H21N7O6	-2	cytosol	C00101	3401	15635	1S/C19H23N7O6/c2019251514(17(30)2619)2311(82215)72110319(2410)16(29)2412(18(31)32)5613(27)28/h14,1112,21,23H,58H2,(H,24,29)(H,27,28)(H,31,32)(H4,20,22,25,26,30)/t11,12/m0/s1	0
ser[c]	LSerine	C3H7NO3	C3H7NO3	0	cytosol	C00065	3365	17115	1S/C3H7NO3/c42(15)3(6)7/h2,5H,1,4H2,(H,6,7)/t2/m0/s1	0
metthf[c]	(6R)5,10Methylenetetrahydrofolate	C20H23N7O6	C20H21N7O6	-2	cytosol	C00143	3443	1989	1S/C20H23N7O6/c2120241615(18(31)2520)27926(812(27)72216)113110(2411)17(30)2313(19(32)33)5614(28)29/h14,1213H,59H2,(H,23,30)(H,28,29)(H,32,33)(H4,21,22,24,25,31)/t12,13+/m1/s1	0
amievul[m]	5Aminolevulinate	C5H9NO3	C5H9NO3	0	mitochondrion	C00430	3719	17549	1S/C5H9NO3/c634(7)125(8)9/h13,6H2,(H,8,9)/p1	0
ala[c]	LAlanine	C3H7NO2	C3H7NO2	0	cytosol	C00041	3343	16977	1S/C3H7NO2/c12(4)3(5)6/h2H,4H2,1H3,(H,5,6)/t2/m0/s1	0
3pser[c]	OPhosphoLserine	C3H8NO6P	C3H6NO6P	-2	cytosol	C01005	4251	15811	1S/C3H8NO6P/c42(3(5)6)11011(7,8)9/h2H,1,4H2,(H,5,6)(H2,7,8,9)/t2/m0/s1	0
hser[c]	LHomoserine	C4H9NO3	C4H9NO3	0	cytosol	C00263	3561	15699	1S/C4H9NO3/c53(126)4(7)8/h3,6H,12,5H2,(H,7,8)/t3/m0/s1	0
phser[c]	OPhosphoLhomoserine	C4H10NO6P	C4H8NO6P	-2	cytosol	C01102	4336	15961	1S/C4H10NO6P/c53(4(6)7)121112(8,9)10/h3H,12,5H2,(H,6,7)(H2,8,9,10)/t3/m0/s1	0
thr[c]	LThreonine	C4H9NO3	C4H9NO3	0	cytosol	C00188	3488	16857	1S/C4H9NO3/c12(6)3(5)4(7)8/h23,6H,5H2,1H3,(H,7,8)/t2,3+/m1/s1	0
igp[c]	1C(Indol3yl)glycerol 3phosphate	C11H14NO6P	C11H12NO6P	-2	cytosol	C03506	6317	18299	1S/C11H14NO6P/c1310(61819(15,16)17)11(14)8512942137(8)9/h15,1014H,6H2,(H2,15,16,17)	0
trp[c]	Ltryptophan	C11H12N2O2	C11H12N2O2	0	cytosol	C00078	3378	16828	1S/C11H12N2O2/c129(11(14)15)576131042138(7)10/h14,6,9,13H,5,12H2,(H,14,15)/t9/m0/s1	0
ser[m]	LSerine	C3H7NO3	C3H7NO3	0	mitochondrion	C00065	3365	17115	1S/C3H7NO3/c42(15)3(6)7/h2,5H,1,4H2,(H,6,7)/t2/m0/s1	0
obut[c]	2Oxobutanoate	C4H6O3	C4H5O3	-1	cytosol	C00109	3409	16763	1S/C4H6O3/c123(5)4(6)7/h2H2,1H3,(H,6,7)	0
thr[m]	LThreonine	C4H9NO3	C4H9NO3	0	mitochondrion	C00188	3488	16857	1S/C4H9NO3/c12(6)3(5)4(7)8/h23,6H,5H2,1H3,(H,7,8)/t2,3+/m1/s1	0
obut[m]	2Oxobutanoate	C4H6O3	C4H5O3	-1	mitochondrion	C00109	3409	16763	1S/C4H6O3/c123(5)4(6)7/h2H2,1H3,(H,6,7)	0
aspsa[c]	LAspartate 4semialdehyde	C4H7NO3	C4H7NO3	0	cytosol	C00441	3730	13086	1S/C4H7NO3/c53(126)4(7)8/h23H,1,5H2,(H,7,8)/p1/t3/m0/s1	0
dmpeno[c]	1,2Dihydroxy5(methylthio)pent1en3one	C6H10O3S	C6H9O3S	-1	cytosol	C15606	44229177	58795	1S/C6H10O3S/c110325(8)6(9)47/h4,7,9H,23H2,1H3/p1/b64	0
mob[c]	4Methylthio2oxobutanoate	C5H8O3S	C5H7O3S	-1	cytosol	C01180	4407	16723	1S/C5H8O3S/c19324(6)5(7)8/h23H2,1H3,(H,7,8)/p1	0
basp[c]	4PhosphoLaspartate	C4H8NO7P	C4H6NO7P	-2	cytosol	C03082	5980	15836	1S/C4H8NO7P/c52(4(7)8)13(6)1213(9,10)11/h2H,1,5H2,(H,7,8)(H2,9,10,11)/t2/m0/s1	0
sam[c]	SAdenosylLmethionine	C15H22N6O5S	C15H23N6O5S	1	cytosol	C00019	3321	15414	1S/C15H22N6O5S/c127(327(16)15(24)25)4810(22)11(23)14(268)21620912(17)1851913(9)21/h58,1011,14,2223H,24,16H2,1H3,(H2,17,18,19,24,25)/p+1/t7,8+,10+,11+,14+,27?/m0/s1	0
hcys[c]	LHomocysteine	C4H9NO2S	C4H9NO2S	0	cytosol	C00155	3455	17588	1S/C4H9NO2S/c53(128)4(6)7/h3,8H,12,5H2,(H,6,7)/t3/m0/s1	0
sah[c]	SAdenosylLhomocysteine	C14H20N6O5S	C14H20N6O5S	0	cytosol	C00021	3323	16680	1S/C14H20N6O5S/c156(14(23)24)1226379(21)10(22)13(257)20519811(16)1741812(8)20/h47,910,13,2122H,13,15H2,(H,23,24)(H2,16,17,18)/t6,7+,9+,10+,13+/m0/s1	0
met[c]	LMethionine	C5H11NO2S	C5H11NO2S	0	cytosol	C00073	3373	16643	1S/C5H11NO2S/c19324(6)5(7)8/h4H,23,6H2,1H3,(H,7,8)/t4/m0/s1	0
oaser[c]	OAcetylLserine	C5H9NO4	C5H9NO4	0	cytosol	C00979	4228	17981	1S/C5H9NO4/c13(7)1024(6)5(8)9/h4H,2,6H2,1H3,(H,8,9)/t4/m0/s1	0
oahser[c]	OAcetylLhomoserine	C6H11NO4	C6H11NO4	0	cytosol	C01077	4315	16288	1S/C6H11NO4/c14(8)11325(7)6(9)10/h5H,23,7H2,1H3,(H,9,10)/t5/m0/s1	0
hser[m]	LHomoserine	C4H9NO3	C4H9NO3	0	mitochondrion	C00263	3561	15699	1S/C4H9NO3/c53(126)4(7)8/h3,6H,12,5H2,(H,7,8)/t3/m0/s1	0
oahser[m]	OAcetylLhomoserine	C6H11NO4	C6H11NO4	0	mitochondrion	C01077	4315	16288	1S/C6H11NO4/c14(8)11325(7)6(9)10/h5H,23,7H2,1H3,(H,9,10)/t5/m0/s1	0
5mta[c]	5SMethyl5thioadenosine	C11H15N5O3S	C11H15N5O3S	0	cytosol	C00170	3470	17509	1S/C11H15N5O3S/c120257(17)8(18)11(195)1641569(12)1331410(6)16/h35,78,11,1718H,2H2,1H3,(H2,12,13,14)/t5,7,8,11/m1/s1	0
mthrip[c]	SMethyl5thioalphaDribose 1phosphate	C6H13O7PS	C6H12O7PS	-1	cytosol	C04188	6864	27859	1S/C6H13O7PS/c115234(7)5(8)6(123)1314(9,10)11/h38H,2H2,1H3,(H2,9,10,11)/t3,4,5,6/m1/s1	0
ad[c]	Adenine	C5H5N5	C5H5N5	0	cytosol	C00147	3447	16708	1S/C5H5N5/c6435(9173)10284/h12H,(H3,6,7,8,9,10)	0
h2s[c]	Hydrogen sulfide	H2S	H2S	0	cytosol	C00283	3578	16136	1S/H2S/h1H2	0
cys[c]	Lcysteine	C3H7NO2S	C3H7NO2S	0	cytosol	C00097	3397	17561	1S/C3H7NO2S/c42(17)3(5)6/h2,7H,1,4H2,(H,5,6)/t2/m0/s1	0
succhomo[c]	OsuccinylLhomoserine	C8H13NO6	C8H12NO6	-1	cytosol	C01118	4349	16160	1S/C8H13NO6/c95(8(13)14)34157(12)216(10)11/h5H,14,9H2,(H,10,11)(H,13,14)/t5/m0/s1	0
llct[c]	LCystathionine	C7H14N2O4S	C7H14N2O4S	0	cytosol	C02291	5347	17482	1S/C7H14N2O4S/c84(6(10)11)121435(9)7(12)13/h45H,13,89H2,(H,10,11)(H,12,13)/t4,5/m0/s1	0
mpyr[m]	Mercaptopyruvate	C3H4O3S	C3H3O3S	-1	mitochondrion	C00957	4208	16208	1S/C3H4O3S/c42(17)3(5)6/h7H,1H2,(H,5,6)/p1	0
slfi[m]	Sulfite	H2O3S	O3S	-2	mitochondrion	C00094	3394	48854	1S/H2O3S/c14(2)3/h(H2,1,2,3)	0
tslf[m]	Thiosulfate	HO3S2	O3S2	-2	mitochondrion	C00320	3614	33539	1S/H2O3S2/c15(2,3)4/h(H2,1,2,3,4)/p1	0
mtrip[c]	SMethyl5thioDribulose 1phosphate	C6H13O7PS	C6H11O7PS	-2	cytosol	C04582	7183	58548	1S/C6H13O7PS/c11535(8)6(9)4(7)21314(10,11)12/h56,89H,23H2,1H3,(H2,10,11,12)/p2/t5,6+/m1/s1	0
cbhcap[c]	(2R,3S)3Isopropylmalate(2)	C7H12O5	C7H10O5	-2	cytosol	C04411	7045	35121	1S/C7H12O5/c13(2)4(6(9)10)5(8)7(11)12/h35,8H,12H3,(H,9,10)(H,11,12)/p2/t4,5+/m0/s1	0
oicap[c]	3Carboxy4methyl2oxopentanoate	C7H10O5	C7H8O5	-2	cytosol	C04236	6905	17214	1S/C7H10O5/c13(2)4(6(9)10)5(8)7(11)12/h34H,12H3,(H,9,10)(H,11,12)/t4/m0/s1	0
emmal[c]	DErythro3Methylmalate	C5H8O5	C5H6O5	-2	cytosol	C06032	8304	58511	1S/C5H8O5/c12(4(7)8)3(6)5(9)10/h23,6H,1H3,(H,7,8)(H,9,10)/p2/t2,3+/m0/s1	0
dmvat[m]	(R)2,3Dihydroxy3methylpentanoate	C6H12O4	C6H11O4	-1	mitochondrion	C06007	8280	49258	1S/C6H12O4/c136(2,10)4(7)5(8)9/h4,7,10H,3H2,12H3,(H,8,9)/p1/t4,6+/m0/s1	0
rhmopt[m]	(R)3Hydroxy3methyl2oxopentanoate	C6H10O4	C6H9O4	-1	mitochondrion	C14463	17395463	49257	1S/C6H10O4/c136(2,10)4(7)5(8)9/h10H,3H2,12H3,(H,8,9)/p1/t6/m1/s1	0
hmobut[m]	3Hydroxy3methyl2oxobutanoic acid	C5H8O4	C5H7O4	-1	mitochondrion	C04181	6858	11812	1S/C5H8O4/c15(2,9)3(6)4(7)8/h9H,12H3,(H,7,8)/p1	0
dmbut[m]	(R)2,3Dihydroxy3methylbutanoate	C5H10O4	C5H9O4	-1	mitochondrion	C04272	6935	49072	1S/C5H10O4/c15(2,9)3(6)4(7)8/h3,6,9H,12H3,(H,7,8)/p1/t3/m0/s1	0
abut[m]	(S)2Aceto2hydroxybutanoate	C6H10O4	C6H9O4	-1	mitochondrion	C06006	8279	49256	1S/C6H10O4/c136(10,4(2)7)5(8)9/h10H,3H2,12H3,(H,8,9)/t6/m0/s1	0
maacoa[c]	2MethylacetoacetylCoA	C26H42N7O18P3S	C26H38N7O18P3S	-4	cytosol	C03344	6187	57335	1S/C26H42N7O18P3S/c113(14(2)34)25(39)55872816(35)562923(38)20(37)26(3,4)104854(45,46)5153(43,44)4791519(5052(40,41)42)18(36)24(4915)3312321721(27)30113122(17)33/h1113,15,1820,24,3637H,510H2,14H3,(H,28,35)(H,29,38)(H,43,44)(H,45,46)(H2,27,30,31)(H2,40,41,42)/p4/t13?,15,18,19,20+,24/m1/s1	0
4mop[c]	4Methyl2oxopentanoate	C6H10O3	C6H9O3	-1	cytosol	C00233	3532	48430	1S/C6H10O3/c14(2)35(7)6(8)9/h4H,3H2,12H3,(H,8,9)	0
leu[c]	Lleucine	C6H13NO2	C6H13NO2	0	cytosol	C00123	3423	15603	1S/C6H13NO2/c14(2)35(7)6(8)9/h45H,3,7H2,12H3,(H,8,9)/t5/m0/s1	0
3mop[c]	(S)3Methyl2oxopentanoate	C6H10O3	C6H9O3	-1	cytosol	C00671	3940	35146	1S/C6H10O3/c134(2)5(7)6(8)9/h4H,3H2,12H3,(H,8,9)/p1/t4/m0/s1	0
ile[c]	LIsoleucine	C6H13NO2	C6H13NO2	0	cytosol	C00407	3697	17191	1S/C6H13NO2/c134(2)5(7)6(8)9/h45H,3,7H2,12H3,(H,8,9)/t4,5/m0/s1	0
val[c]	LValine	C5H11NO2	C5H11NO2	0	cytosol	C00183	3483	16414	1S/C5H11NO2/c13(2)4(6)5(7)8/h34H,6H2,12H3,(H,7,8)/t4/m0/s1	0
4mop[m]	4Methyl2oxopentanoate	C6H10O3	C6H9O3	-1	mitochondrion	C00233	3532	48430	1S/C6H10O3/c14(2)35(7)6(8)9/h4H,3H2,12H3,(H,8,9)	0
leu[m]	LLeucine	C6H13NO2	C6H13NO2	0	mitochondrion	C00123	3423	15603	1S/C6H13NO2/c14(2)35(7)6(8)9/h45H,3,7H2,12H3,(H,8,9)/t5/m0/s1	0
3mop[m]	(S)3Methyl2oxopentanoate	C6H10O3	C6H9O3	-1	mitochondrion	C00671	3940	35146	1S/C6H10O3/c134(2)5(7)6(8)9/h4H,3H2,12H3,(H,8,9)/p1/t4/m0/s1	0
ile[m]	LIsoleucine	C6H13NO2	C6H13NO2	0	mitochondrion	C00407	3697	17191	1S/C6H13NO2/c134(2)5(7)6(8)9/h45H,3,7H2,12H3,(H,8,9)/t4,5/m0/s1	0
oicap[m]	3Carboxy4methyl2oxopentanoate	C7H10O5	C7H8O5	-2	mitochondrion	C04236	6905	17214	1S/C7H10O5/c13(2)4(6(9)10)5(8)7(11)12/h34H,12H3,(H,9,10)(H,11,12)/t4/m0/s1	0
ppmal[c]	2Isopropylmaleate	C7H10O4	C7H8O4	-2	cytosol	C02631	5611	17275	1/C7H10O4/c14(2)5(7(10)11)36(8)9/h34H,12H3,(H,8,9)(H,10,11)/b53	0
metbycoa[m]	(2S,3S)3Hydroxy2methylbutanoylCoA	C26H44N7O18P3S	C26H40N7O18P3S	-4	mitochondrion	C04405	7041	15449	1S/C26H44N7O18P3S/c113(14(2)34)25(39)55872816(35)562923(38)20(37)26(3,4)104854(45,46)5153(43,44)4791519(5052(40,41)42)18(36)24(4915)3312321721(27)30113122(17)33/h1115,1820,24,34,3637H,510H2,14H3,(H,28,35)(H,29,38)(H,43,44)(H,45,46)(H2,27,30,31)(H2,40,41,42)/p4/t13?,14?,15,18,19,20+,24/m1/s1	0
maacoa[m]	2MethylacetoacetylCoA	C26H42N7O18P3S	C26H38N7O18P3S	-4	mitochondrion	C03344	6187	57335	1S/C26H42N7O18P3S/c113(14(2)34)25(39)55872816(35)562923(38)20(37)26(3,4)104854(45,46)5153(43,44)4791519(5052(40,41)42)18(36)24(4915)3312321721(27)30113122(17)33/h1113,15,1820,24,3637H,510H2,14H3,(H,28,35)(H,29,38)(H,43,44)(H,45,46)(H2,27,30,31)(H2,40,41,42)/p4/t13?,15,18,19,20+,24/m1/s1	0
hyisorate[m]	(S)3Hydroxyisobutyrate	C4H8O3	C4H7O3	-1	mitochondrion	C06001	8275	62638	1S/C4H8O3/c13(25)4(6)7/h3,5H,2H2,1H3,(H,6,7)/p1/t3/m0/s1	0
mmsal[m]	(S)Methylmalonate semialdehyde	C4H6O3	C4H5O3	-1	mitochondrion	C06002	8276	62413	1S/C4H6O3/c13(25)4(6)7/h23H,1H3,(H,6,7)/p1/t3/m0/s1	0
mmsal[c]	(S)Methylmalonate semialdehyde	C4H6O3	C4H5O3	-1	cytosol	C06002	8276	62413	1S/C4H6O3/c13(25)4(6)7/h23H,1H3,(H,6,7)/p1/t3/m0/s1	0
mmal[c]	Methylmalonate	C4H6O4	C4H4O4	-2	cytosol	C02170	5245	30860	1S/C4H6O4/c12(3(5)6)4(7)8/h2H,1H3,(H,5,6)(H,7,8)/p2	0
mmal[m]	Methylmalonate	C4H6O4	C4H4O4	-2	mitochondrion	C02170	5245	30860	1S/C4H6O4/c12(3(5)6)4(7)8/h2H,1H3,(H,5,6)(H,7,8)/p2	0
3mbcoa[m]	3MethylbutanoylCoA	C26H44N7O17P3S	C26H40N7O17P3S	-4	mitochondrion	C02939	5858	57345	1S/C26H44N7O17P3S/c114(2)917(35)54872816(34)562924(38)21(37)26(3,4)114753(44,45)5052(42,43)46101520(4951(39,40)41)19(36)25(4815)3313321822(27)30123123(18)33/h1215,1921,25,3637H,511H2,14H3,(H,28,34)(H,29,38)(H,42,43)(H,44,45)(H2,27,30,31)(H2,39,40,41)/p4/t15,19,20,21+,25/m1/s1	0
mbcoa[m]	2MethylbutanoylCoA	C26H44N7O17P3S	C26H40N7O17P3S	-4	mitochondrion	C01033	4276	15477	1S/C26H44N7O17P3S/c1514(2)25(38)54982816(34)672923(37)20(36)26(3,4)114753(44,45)5052(42,43)46101519(4951(39,40)41)18(35)24(4815)3313321721(27)30123122(17)33/h1215,1820,24,3536H,511H2,14H3,(H,28,34)(H,29,37)(H,42,43)(H,44,45)(H2,27,30,31)(H2,39,40,41)/t14?,15,18,19,20+,24/m1/s1	0
omval[m]	(R)3Methyl2oxobutanoate	C5H8O3	C5H7O3	-1	mitochondrion	C00141	3441	16530	1S/C5H8O3/c13(2)4(6)5(7)8/h3H,12H3,(H,7,8)	0
ibcoa[m]	IsobutyrylCoA	C25H42N7O17P3S	C25H38N7O17P3S	-4	mitochondrion	C00630	3903	57338	1S/C25H42N7O17P3S/c113(2)24(37)53872715(33)562822(36)19(35)25(3,4)104652(43,44)4951(41,42)4591418(4850(38,39)40)17(34)23(4714)3212311620(26)29113021(16)32/h1114,1719,23,3435H,510H2,14H3,(H,27,33)(H,28,36)(H,41,42)(H,43,44)(H2,26,29,30)(H2,38,39,40)/p4/t14,17,18,19+,23/m1/s1	0
mccoa[m]	3MethylcrotonylCoA	C26H42N7O17P3S	C26H38N7O17P3S	-4	mitochondrion	C03069	5969	15486	1S/C26H42N7O17P3S/c114(2)917(35)54872816(34)562924(38)21(37)26(3,4)114753(44,45)5052(42,43)46101520(4951(39,40)41)19(36)25(4815)3313321822(27)30123123(18)33/h9,1213,15,1921,25,3637H,58,1011H2,14H3,(H,28,34)(H,29,38)(H,42,43)(H,44,45)(H2,27,30,31)(H2,39,40,41)/p4/t15,19,20,21+,25/m1/s1	0
maclcoa[m]	MethacrylylCoA	C25H40N7O17P3S	C25H36N7O17P3S	-4	mitochondrion	C03460	6280	62500	1S/C25H40N7O17P3S/c113(2)24(37)53872715(33)562822(36)19(35)25(3,4)104652(43,44)4951(41,42)4591418(4850(38,39)40)17(34)23(4714)3212311620(26)29113021(16)32/h1112,14,1719,23,3435H,1,510H2,24H3,(H,27,33)(H,28,36)(H,41,42)(H,43,44)(H2,26,29,30)(H2,38,39,40)/p4/t14,17,18,19+,23/m1/s1	0
mbecoa[m]	trans2Methylbut2enoylCoA	C26H42N7O17P3S	C26H38N7O17P3S	-4	mitochondrion	C03345	6188	15478	1S/C26H42N7O17P3S/c1514(2)25(38)54982816(34)672923(37)20(36)26(3,4)114753(44,45)5052(42,43)46101519(4951(39,40)41)18(35)24(4815)3313321721(27)30123122(17)33/h5,1213,15,1820,24,3536H,611H2,14H3,(H,28,34)(H,29,37)(H,42,43)(H,44,45)(H2,27,30,31)(H2,39,40,41)/p4/b145+/t15,18,19,20+,24/m1/s1	0
hyisocoa[m]	(S)3HydroxyisobutyrylCoA	C25H42N7O18P3S	C25H38N7O18P3S	-4	mitochondrion	C06000	8274	28259	1S/C25H42N7O18P3S/c113(833)24(38)54762715(34)452822(37)19(36)25(2,3)104753(44,45)5052(42,43)4691418(4951(39,40)41)17(35)23(4814)3212311620(26)29113021(16)32/h1114,1719,23,33,3536H,410H2,13H3,(H,27,34)(H,28,37)(H,42,43)(H,44,45)(H2,26,29,30)(H2,39,40,41)/p4/t13,14+,17+,18+,19,23+/m0/s1	0
hicoa[m]	3HydroxyisovalerylCoA	C26H44N7O18P3S	C26H40N7O18P3S	-4	mitochondrion	C05998	8272	62555	1S/C26H44N7O18P3S/c125(2,20(37)23(38)296515(34)28785516(35)926(3,4)39)114854(45,46)5153(43,44)47101419(5052(40,41)42)18(36)24(4914)3313321721(27)30123122(17)33/h1214,1820,24,3637,39H,511H2,14H3,(H,28,34)(H,29,38)(H,43,44)(H,45,46)(H2,27,30,31)(H2,40,41,42)/p4	0
mgcoa[m]	3MethylglutaconylCoA	C27H42N7O19P3S	C27H37N7O19P3S	-5	mitochondrion	C03231	6102	15488	1S/C27H42N7O19P3S/c114(817(36)37)918(38)57762916(35)453025(41)22(40)27(2,3)115056(47,48)5355(45,46)49101521(5254(42,43)44)20(39)26(5115)3413331923(28)31123224(19)34/h8,1213,15,2022,26,3940H,47,911H2,13H3,(H,29,35)(H,30,41)(H,36,37)(H,45,46)(H,47,48)(H2,28,31,32)(H2,42,43,44)/b148+/t15,20,21,22+,26/m1/s1	0
oxag[m]	Oxaloglutarate	C7H5O7	C7H5O7	-3	mitochondrion	c05533	0	0	0	0
oap[m]	2Oxoadipate	C6H8O5	C6H6O5	-2	mitochondrion	C00322	3616	57499	1S/C6H8O5/c74(6(10)11)2135(8)9/h13H2,(H,8,9)(H,10,11)/p2	0
hicit[m]	Homoisocitrate	C7H10O7	C7H7O7	-3	mitochondrion	C05662	7972	30904	1S/C7H10O7/c84(9)213(6(11)12)5(10)7(13)14/h3,5,10H,12H2,(H,8,9)(H,11,12)(H,13,14)/p3	0
ama[c]	L2Aminoadipate	C6H11NO4	C6H10NO4	-1	cytosol	C00956	4207	37023	1S/C6H11NO4/c74(6(10)11)2135(8)9/h4H,13,7H2,(H,8,9)(H,10,11)/p2/t4/m0/s1	0
amasa[c]	L2Aminoadipate 6semialdehyde	C6H11NO3	C6H11NO3	0	cytosol	C04076	6771	17917	1S/C6H11NO3/c75(6(9)10)31248/h45H,13,7H2,(H,9,10)/t5/m0/s1	0
ama[m]	L2Aminoadipate	C6H11NO4	C6H10NO4	-1	mitochondrion	C00956	4207	37023	1S/C6H11NO4/c74(6(10)11)2135(8)9/h4H,13,7H2,(H,8,9)(H,10,11)/p2/t4/m0/s1	0
amasa[m]	L2Aminoadipate 6semialdehyde	C6H11NO3	C6H11NO3	0	mitochondrion	C04076	6771	17917	1S/C6H11NO3/c75(6(9)10)31248/h45H,13,7H2,(H,9,10)/t5/m0/s1	0
glucoa[m]	GlutarylCoA	C26H42N7O19P3S	C26H37N7O19P3S	-5	mitochondrion	C00527	3810	57378	1S/C26H42N7O19P3S/c126(2,21(39)24(40)297615(34)28895617(37)53416(35)36)114955(46,47)5254(44,45)48101420(5153(41,42)43)19(38)25(5014)3313321822(27)30123123(18)33/h1214,1921,25,3839H,311H2,12H3,(H,28,34)(H,29,40)(H,35,36)(H,44,45)(H,46,47)(H2,27,30,31)(H2,41,42,43)/p5/t14,19,20,21+,25/m1/s1	0
c4dcoa[m]	CrotonoylCoA	C25H40N7O17P3S	C25H36N7O17P3S	-4	mitochondrion	C00877	4133	57332	1S/C25H40N7O17P3S/c14516(34)53982715(33)672823(37)20(36)25(2,3)114652(43,44)4951(41,42)45101419(4850(38,39)40)18(35)24(4714)3213311721(26)29123022(17)32/h45,1214,1820,24,3536H,611H2,13H3,(H,27,33)(H,28,37)(H,41,42)(H,43,44)(H2,26,29,30)(H2,38,39,40)/p4/b54+/t14,18,19,20?,24/m1/s1	0
sacp[c]	LSaccharopine	C11H20N2O6	C11H19N2O6	-1	cytosol	C00449	3737	16927	1S/C11H20N2O6/c127(10(16)17)3126138(11(18)19)459(14)15/h78,13H,16,12H2,(H,14,15)(H,16,17)(H,18,19)/t7,8/m0/s1	0
lys[c]	LLysine	C6H14N2O2	C6H15N2O2	1	cytosol	C00047	3349	18019	1S/C6H14N2O2/c742135(8)6(9)10/h5H,14,78H2,(H,9,10)/t5/m0/s1	0
lys[m]	LLysine	C6H14N2O2	C6H15N2O2	1	mitochondrion	C00047	3349	18019	1S/C6H14N2O2/c742135(8)6(9)10/h5H,14,78H2,(H,9,10)/t5/m0/s1	0
sacp[m]	LSaccharopine	C11H20N2O6	C11H19N2O6	-1	mitochondrion	C00449	3737	16927	1S/C11H20N2O6/c127(10(16)17)3126138(11(18)19)459(14)15/h78,13H,16,12H2,(H,14,15)(H,16,17)(H,18,19)/t7,8/m0/s1	0
oap[c]	2Oxoadipate	C6H8O5	C6H6O5	-2	cytosol	C00322	3616	57499	1S/C6H8O5/c74(6(10)11)2135(8)9/h13H2,(H,8,9)(H,10,11)/p2	0
hacn[m]	But1ene1,2,4tricarboxylic acid	C7H8O6	C7H5O6	-3	mitochondrion	C04002	6715	17516	1S/C7H8O6/c85(9)214(7(12)13)36(10)11/h3H,12H2,(H,8,9)(H,10,11)(H,12,13)/b43	0
abutn[c]	4Aminobutanal	C4H9NO	C4H10NO	1	cytosol	C00555	3835	17769	1S/C4H9NO/c531246/h4H,13,5H2	0
gaba[c]	4Aminobutanoate	C4H9NO2	C4H9NO2	0	cytosol	C00334	3628	59888	1/C4H9NO2/c53124(6)7/h13,5H2,(H,6,7)/p1/fC4H8NO2/q1	0
abutn[m]	4Aminobutanal	C4H9NO	C4H10NO	1	mitochondrion	C00555	3835	17769	1S/C4H9NO/c531246/h4H,13,5H2	0
naglup[m]	NAcetylLglutamate 5phosphate|NAcetylLglutamyl 5phosphate|Nacetylglutamylphosphate|Nacetyl5glutamyl phosphate|nacetylglutamylphosphate	C7H12NO8P	C7H9NO8P	-3	mitochondrion	C04133	6819	16878	1S/C7H12NO8P/c14(9)85(7(11)12)236(10)1617(13,14)15/h5H,23H2,1H3,(H,8,9)(H,11,12)(H2,13,14,15)/t5/m0/s1	0
naglus[m]	NAcetylLglutamate 5semialdehyde	C7H11NO4	C7H10NO4	-1	mitochondrion	C01250	4470	29123	1S/C7H11NO4/c15(10)86(7(11)12)3249/h4,6H,23H2,1H3,(H,8,10)(H,11,12)/p1/t6/m0/s1	0
glup[c]	alphaDGlutamyl phosphate	C5H10NO7P	C5H8NO7P	-2	cytosol	C03734	6497	28459	1S/C5H10NO7P/c63(124(7)8)5(9)1314(10,11)12/h3H,12,6H2,(H,7,8)(H2,10,11,12)/t3/m1/s1	0
glugsal[c]	LGlutamate 5semialdehyde	C5H9NO3	C5H9NO3	0	cytosol	C01165	4392	17232	1S/C5H9NO3/c64(5(8)9)2137/h34H,12,6H2,(H,8,9)/t4/m0/s1	0
p5c[c]	(S)1Pyrroline5carboxylate	C5H7NO2	C5H6NO2	-1	cytosol	C03912	6642	371	1S/C5H7NO2/c75(8)421364/h34H,12H2,(H,7,8)/t4/m0/s1	0
pro[m]	LProline	C5H9NO2	C5H9NO2	0	mitochondrion	C00148	3448	17203	1S/C5H9NO2/c75(8)421364/h4,6H,13H2,(H,7,8)/t4/m0/s1	0
p5c[m]	(S)1Pyrroline5carboxylate	C5H7NO2	C5H6NO2	-1	mitochondrion	C03912	6642	371	1S/C5H7NO2/c75(8)421364/h34H,12H2,(H,7,8)/t4/m0/s1	0
pro[c]	LProline	C5H9NO2	C5H9NO2	0	cytosol	C00148	3448	17203	1S/C5H9NO2/c75(8)421364/h4,6H,13H2,(H,7,8)/t4/m0/s1	0
fad[c]	FAD	C27H33N9O15P2	C27H31N9O15P2	-2	cytosol	C00016	3318	16238	1S/C27H33N9O15P2/c11031213(411(10)2)35(2418(3212)25(42)3427(43)3324)514(37)19(39)15(38)64852(44,45)5153(46,47)4971620(40)21(41)26(5016)369311722(28)2983023(17)36/h34,89,1416,1921,26,3741H,57H2,12H3,(H,44,45)(H,46,47)(H2,28,29,30)(H,34,42,43)/t14,15+,16+,19,20+,21+,26+/m0/s1	0
fadh2[c]	FADH2	C27H35N9O15P2	C27H33N9O15P2	-2	cytosol	C01352	4556	17877	1S/C27H35N9O15P2/c11031213(411(10)2)35(2418(3212)25(42)3427(43)3324)514(37)19(39)15(38)64852(44,45)5153(46,47)4971620(40)21(41)26(5016)369311722(28)2983023(17)36/h34,89,1416,1921,26,32,3741H,57H2,12H3,(H,44,45)(H,46,47)(H2,28,29,30)(H2,33,34,42,43)/t14,15+,16+,19,20+,21+,26+/m0/s1	0
phc[c]	L1Pyrroline3hydroxy5carboxylate	C5H7NO3	C5H6NO3	-1	cytosol	C04281	6943	62612	1S/C5H7NO3/c7314(5(8)9)623/h24,7H,1H2,(H,8,9)/p1/t3,4+/m1/s1	0
hpro[c]	Hydroxyproline	C5H9NO3	C5H9NO3	0	cytosol	C01157	4385	18095	1S/C5H9NO3/c7314(5(8)9)623/h34,67H,12H2,(H,8,9)/t3,4+/m1/s1	0
sprmd[c]	Spermidine	C7H19N3	C7H22N3	3	cytosol	C00315	3609	16610	1S/C7H19N3/c84126107359/h10H,19H2	0
daprp[c]	1,3Diaminopropane	C3H10N2	C3H12N2	2	cytosol	C00986	4233	15725	1S/C3H10N2/c42135/h15H2	0
sprm[c]	Spermine	C10H26N4	C10H30N4	4	cytosol	C00750	4012	15746	1S/C10H26N4/c1153913712814104612/h1314H,112H2	0
aproa[c]	3Aminopropanal	C3H7NO	C3H8NO	1	cytosol	C05665	7975	18090	1S/C3H7NO/c42135/h3H,12,4H2	0
cap[m]	Carbamoyl phosphate	CH4NO5P	CH2NO5P	-2	mitochondrion	C00169	3469	17672	1S/CH4NO5P/c21(3)78(4,5)6/h(H2,2,3)(H2,4,5,6)	0
orn[m]	LOrnithine	C5H12N2O2	C5H13N2O2	1	mitochondrion	C00077	3377	15729	1S/C5H12N2O2/c63124(7)5(8)9/h4H,13,67H2,(H,8,9)/t4/m0/s1	0
citr[m]	LCitrulline	C6H13N3O3	C6H13N3O3	0	mitochondrion	C00327	3621	16349	1S/C6H13N3O3/c74(5(10)11)21396(8)12/h4H,13,7H2,(H,10,11)(H3,8,9,12)/t4/m0/s1	0
naglu[m]	NAcetylLglutamate	C7H11NO5	C7H9NO5	-2	mitochondrion	C00624	3897	44337	1S/C7H11NO5/c14(9)85(7(12)13)236(10)11/h5H,23H2,1H3,(H,8,9)(H,10,11)(H,12,13)/p2/t5/m0/s1	0
naorn[m]	N2AcetylLornithine	C7H14N2O3	C7H14N2O3	0	mitochondrion	C00437	3726	16543	1S/C7H14N2O3/c15(10)96(7(11)12)3248/h6H,24,8H2,1H3,(H,9,10)(H,11,12)/t6/m0/s1	0
dsam[c]	SAdenosylmethioninamine	C14H23N6O3S	C14H24N6O3S	2	cytosol	C01137	4368	15625	1S/C14H23N6O3S/c124(42315)5810(21)11(22)14(238)20719912(16)1761813(9)20/h68,1011,14,2122H,25,15H2,1H3,(H2,16,17,18)/q+1/t8,10,11,14,24?/m1/s1	0
ptrsc[c]	Putrescine	C4H12N2	C4H14N2	2	cytosol	C00134	3434	17148	1S/C4H12N2/c531246/h16H2	0
orn[c]	LOrnithine	C5H12N2O2	C5H13N2O2	1	cytosol	C00077	3377	15729	1S/C5H12N2O2/c63124(7)5(8)9/h4H,13,67H2,(H,8,9)/t4/m0/s1	0
urea[c]	Urea	CH4N2O	CH4N2O	0	cytosol	C00086	3386	16199	1S/CH4N2O/c21(3)4/h(H4,2,3,4)	0
ureac[c]	Urea1carboxylic acid	C2H4N2O3	C2H3N2O3	-1	cytosol	C01010	4255	15832	1S/C2H4N2O3/c31(5)42(6)7/h(H,6,7)(H3,3,4,5)/p1	0
agm[c]	Agmatine	C5H14N4	C5H16N4	2	cytosol	C00179	3479	17431	1S/C5H14N4/c6312495(7)8/h14,6H2,(H4,7,8,9)	0
hgsal[c]	L4Hydroxyglutamate semialdehyde	C5H9NO4	C5H9NO4	0	cytosol	C05938	8224	27809	1S/C5H9NO4/c64(5(9)10)13(8)27/h24,8H,1,6H2,(H,9,10)/t3,4+/m1/s1	0
dpro[c]	DProline	C5H9NO2	C5H9NO2	0	cytosol	C00763	4025	16313	0	0
pyc[c]	1Pyrroline2carboxylate	C5H7NO2	C5H6NO2	-1	cytosol	C03564	6356	36761	0	0
thpro[c]	trans3HydroxyLproline	C5H9NO3	C5H9NO3	0	cytosol	C05147	7565	16889	0	0
lin[c]	Linatine	C10H17N3O5	C10H17N3O5	0	cytosol	C05939	8225	28004	0	0
hisol[c]	LHistidinol	C6H11N3O	C6H12N3O	1	cytosol	C00860	4117	16255	1S/C6H11N3O/c75(310)1628496/h2,45,10H,1,3,7H2,(H,8,9)/t5/m0/s1	0
his[c]	LHistidine	C6H9N3O2	C6H9N3O2	0	cytosol	C00135	3435	57595	1S/C6H9N3O2/c75(6(10)11)1428394/h23,5H,1,7H2,(H,8,9)(H,10,11)/t5/m0/s1	0
prbatp[c]	1(5PhosphoDribosyl)ATP	C15H25N5O20P4	C15H19N5O20P4	-6	cytosol	C02739	5699	73183	1S/C15H25N5O20P4/c1612713(18419(12)1410(23)8(21)5(3714)13541(25,26)27)20(3177)1511(24)9(22)6(3815)23643(31,32)4044(33,34)3942(28,29)30/h36,811,1416,2124H,12H2,(H,31,32)(H,33,34)(H2,25,26,27)(H2,28,29,30)/t5,6,8,9,10,11,14?,15/m1/s1	0
imacp[c]	3(Imidazol4yl)2oxopropyl dihydrogen phosphate	C6H9N2O5P	C6H7N2O5P	-2	cytosol	C01267	4486	16426	1S/C6H9N2O5P/c96(31314(10,11)12)1527485/h2,4H,1,3H2,(H,7,8)(H2,10,11,12)	0
hisolp[c]	LHistidinol phosphate	C6H12N3O4P	C6H11N3O4P	-1	cytosol	C01100	4334	16996	1S/C6H12N3O4P/c75(31314(10,11)12)1628496/h2,45H,1,3,7H2,(H,8,9)(H2,10,11,12)/t5/m0/s1	0
prbamp[c]	1(5Phosphoribosyl)5AMP	C15H23N5O14P2	C15H19N5O14P2	-4	cytosol	C02741	5701	18374	1S/C15H23N5O14P2/c1612713(18419(12)1410(23)8(21)5(3314)13135(25,26)27)20(3177)1511(24)9(22)6(3415)23236(28,29)30/h36,811,1416,2124H,12H2,(H2,25,26,27)(H2,28,29,30)/t5,6,8,9,10,11,14,15/m1/s1	0
prfp[c]	1(5PhosphoDribosyl)5[(5phosphoDribosylamino)methylideneamino]imidazole4carboxamide	C15H25N5O15P2	C15H21N5O15P2	-4	cytosol	C04896	7447	18302	1S/C15H25N5O15P2/c1612(25)713(173181410(23)8(21)5(3414)13236(26,27)28)20(4197)1511(24)9(22)6(3515)23337(29,30)31/h36,811,1415,2124H,12H2,(H2,16,25)(H,17,18)(H2,26,27,28)(H2,29,30,31)/t5,6,8,9,10,11,14,15/m1/s1	0
hin[c]	Histamine	C5H9N3	C5H10N3	1	cytosol	C00388	3678	18295	1S/C5H9N3/c621537485/h34H,12,6H2,(H,7,8)/p+1	0
prlp[c]	5[(5Phospho1deoxyDribulos1ylimino)methylamino]1(5phosphoDribosyl)imidazole4carboxamide	C15H25N5O15P2	C15H21N5O15P2	-4	cytosol	C04916	7464	27735	1S/C15H25N5O15P2/c1613(26)914(1841716(21)10(23)7(22)23336(27,28)29)20(5199)1512(25)11(24)8(3515)33437(30,31)32/h45,78,1012,15,2225H,13H2,(H2,16,26)(H,17,18)(H2,27,28,29)(H2,30,31,32)/t7,8,10+,11,12,15/m1/s1	0
dimgp[c]	DErythro1(Imidazol4yl)glycerol 3phosphate	C6H11N2O6P	C6H9N2O6P	-2	cytosol	C04666	7249	17805	1S/C6H11N2O6P/c95(21415(11,12)13)6(10)417384/h1,3,56,910H,2H2,(H,7,8)(H2,11,12,13)/t5,6+/m1/s1	0
homogen[c]	Homogentisate	C8H8O4	C8H7O4	-1	cytosol	C00544	3825	16169	1S/C8H8O4/c96127(10)5(36)48(11)12/h13,910H,4H2,(H,11,12)/p1	0
macac[c]	4Maleylacetoacetate	C8H8O6	C8H6O6	-2	cytosol	C01036	4279	47904	1S/C8H8O6/c95(127(11)12)36(10)48(13)14/h12H,34H2,(H,11,12)(H,13,14)/b21	0
tyr[c]	Ltyrosine	C9H11NO3	C9H11NO3	0	cytosol	C00082	3382	17895	1S/C9H11NO3/c108(9(12)13)56137(11)426/h14,8,11H,5,10H2,(H,12,13)/t8/m0/s1	0
dopa[c]	3,4DihydroxyLphenylalanine	C9H11NO4	C9H11NO4	0	cytosol	C00355	3648	15765	1S/C9H11NO4/c106(9(13)14)35127(11)8(12)45/h12,4,6,1112H,3,10H2,(H,13,14)/t6/m0/s1	0
dhpacl[m]	3,4Dihydroxyphenylacetaldehyde	C8H8O3	C8H8O3	0	mitochondrion	C04043	6744	27978	1S/C8H8O3/c9436127(10)8(11)56/h12,45,1011H,3H2	0
34hpac[m]	3,4Dihydroxyphenylacetate	C8H8O4	C8H7O4	-1	mitochondrion	C01161	4388	41941	1S/C8H8O4/c96215(37(6)10)48(11)12/h13,910H,4H2,(H,11,12)/p1	0
dopn[c]	Dopamine	C8H11NO2	C8H12NO2	1	cytosol	C03758	6517	18243	1S/C8H11NO2/c9436127(10)8(11)56/h12,5,1011H,34,9H2/p+1	0
dhpacl[c]	3,4Dihydroxyphenylacetaldehyde	C8H8O3	C8H8O3	0	cytosol	C04043	6744	27978	1S/C8H8O3/c9436127(10)8(11)56/h12,45,1011H,3H2	0
tyr[m]	LTyrosine	C9H11NO3	C9H11NO3	0	mitochondrion	C00082	3382	17895	1S/C9H11NO3/c108(9(12)13)56137(11)426/h14,8,11H,5,10H2,(H,12,13)/t8/m0/s1	0
4hpp[m]	3-(4-Hydroxyphenyl)pyruvate	C9H8O4	C9H7O4	-1	mitochondrion	C01179	4406	36242	1S/C9H8O4/c10-7-3-1-6(2-4-7)5-8(11)9(12)13/h1-4,10H,5H2,(H,12,13)/p-1	CC6(=C(C)C=C5(C(N=C1(C(=O)[N-]C(=O)N=C1N(CC(C(O)C(O)COP(OP([O-])(OCC4(C(O)C(O)C(N3(C=NC2(C(N)=NC=NC=23)))O4))=O)([O-])=O)O)5))=C6))
4hpp[c]	3-(4-Hydroxyphenyl)pyruvate	C9H8O4	C9H7O4	-1	cytosol	C01179	4406	36242	1S/C9H8O4/c10-7-3-1-6(2-4-7)5-8(11)9(12)13/h1-4,10H,5H2,(H,12,13)/p-1	CC6(=C(C)C=C5(C(N=C1(C(=O)[N-]C(=O)N=C1N(CC(C(O)C(O)COP(OP([O-])(OCC4(C(O)C(O)C(N3(C=NC2(C(N)=NC=NC=23)))O4))=O)([O-])=O)O)5))=C6))
fuacac[c]	4Fumarylacetoacetic acid	C8H8O6	C8H6O6	-2	cytosol	C01061	4300	30907	1S/C8H8O6/c95(127(11)12)36(10)48(13)14/h12H,34H2,(H,11,12)(H,13,14)/b21+	0
actac[c]	Acetoacetate	C4H6O3	C4H5O3	-1	cytosol	C00164	3464	13705	1S/C4H6O3/c13(5)24(6)7/h2H2,1H3,(H,6,7)/p1	0
hhpp[c]	2Hydroxy3(4hydroxyphenyl)propenoate	C9H8O4	C9H7O4	-1	cytosol	C05350	7728	27683	1S/C9H8O4/c107316(247)58(11)9(12)13/h15,1011H,(H,12,13)/b85	0
phe[c]	LPhenylalanine	C9H11NO2	C9H11NO2	0	cytosol	C00079	3379	17295	1S/C9H11NO2/c108(9(11)12)67421357/h15,8H,6,10H2,(H,11,12)/t8/m0/s1	0
pad[c]	2Phenylacetamide	C8H9NO	C8H9NO	0	cytosol	C02505	5517	16562	1S/C8H9NO/c98(10)67421357/h15H,6H2,(H2,9,10)	0
phpyr[c]	Phenylpyruvate	C9H8O3	C9H7O3	-1	cytosol	C00166	3466	30851	1S/C9H8O3/c108(9(11)12)67421357/h15H,6H2,(H,11,12)	0
hphea[c]	2Hydroxyphenylacetate	C8H8O3	C8H7O3	-1	cytosol	C05852	8145	28478	1S/C8H8O3/c9742136(7)58(10)11/h14,9H,5H2,(H,10,11)/p1	0
phal[m]	Phenylacetaldehyde	C8H8O	C8H8O	0	mitochondrion	C00601	3876	16424	1S/C8H8O/c9768421358/h15,7H,6H2	0
pac[m]	Phenylacetate	C8H8O2	C8H7O2	-1	mitochondrion	C07086	9297	30745	1S/C8H8O2/c98(10)67421357/h15H,6H2,(H,9,10)	0
pnn[c]	Phenethylamine	C8H11N	C8H12N	1	cytosol	C05332	7711	18397	1S/C8H11N/c9768421358/h15H,67,9H2/p+1	0
phal[c]	Phenylacetaldehyde	C8H8O	C8H8O	0	cytosol	C00601	3876	16424	1S/C8H8O/c9768421358/h15,7H,6H2	0
pac[c]	Phenylacetate	C8H8O2	C8H7O2	-1	cytosol	C07086	9297	30745	1S/C8H8O2/c98(10)67421357/h15H,6H2,(H,9,10)	0
cin[c]	transCinnamate	C9H8O2	C9H7O2	-1	cytosol	C00423	3713	35697	1S/C9H8O2/c109(11)768421358/h17H,(H,10,11)/p1/b76+	0
hppp[c]	2Hydroxy3phenylpropenoate	C9H8O3	C9H7O3	-1	cytosol	C02763	5719	32815	1S/C9H8O3/c108(9(11)12)67421357/h16,10H,(H,11,12)/p1/b86	0
26hpac[c]	2,6Dihydroxyphenylacetate	C8H8O4	C8H7O4	-1	cytosol	C06207	8457	28440	1S/C8H8O4/c96215(37(6)10)48(11)12/h13,910H,4H2,(H,11,12)/p1	0
han[m]	3Hydroxyanthranilic acid	C7H7NO3	C7H6NO3	-1	mitochondrion	C00632	3905	15793	1S/C7H7NO3/c864(7(10)11)2135(6)9/h13,9H,8H2,(H,10,11)	0
cinn[m]	Cinnavalininate	C14H8N2O6	C14H6N2O6	-2	mitochondrion	C05640	7951	3715	1S/C14H8N2O6/c15106(17)4812(9(10)14(20)21)16115(13(18)19)2137(11)228/h14H,15H2,(H,18,19)(H,20,21)/p2	0
o2.-[m]	O2.	HO2	O2	-1	mitochondrion	C00704	3971	18421	1S/HO2/c12/h1H/p1	0
fkyn[c]	LFormylkynurenine	C11H12N2O4	C11H12N2O4	0	cytosol	C02700	5664	30249	1S/C11H12N2O4/c128(11(16)17)510(15)731249(7)13614/h14,6,8H,5,12H2,(H,13,14)(H,16,17)/t8/m0/s1	0
l5htp[c]	5HydroxyLtryptophan	C11H12N2O3	C11H12N2O3	0	cytosol	C00643	3916	17780	1S/C11H12N2O3/c129(11(15)16)3651310217(14)48(6)10/h12,45,9,1314H,3,12H2,(H,15,16)/t9/m0/s1	0
hfkyn[c]	5HydroxyNformylkynurenine	C11H12N2O5	C11H12N2O5	0	cytosol	C05648	7959	2065	1S/C11H12N2O5/c128(11(17)18)410(16)736(15)129(7)13514/h13,5,8,15H,4,12H2,(H,13,14)(H,17,18)	0
set[c]	Serotonin	C10H12N2O	C10H13N2O	1	cytosol	C00780	4041	28790	1S/C10H12N2O/c1143761210218(13)59(7)10/h12,56,1213H,34,11H2/p+1	0
fhkyn[c]	Formyl5hydroxykynurenamine	C10H12N2O3	C10H12N2O3	0	cytosol	C05647	7958	28736	1S/C10H12N2O3/c114310(15)857(14)129(8)12613/h12,56,14H,34,11H2,(H,12,13)	0
han[c]	3Hydroxyanthranilic acid	C7H7NO3	C7H6NO3	-1	cytosol	C00632	3905	15793	1S/C7H7NO3/c864(7(10)11)2135(6)9/h13,9H,8H2,(H,10,11)	0
cmusa[c]	2Amino3carboxymuconate semialdehyde	C7H7NO5	C7H5NO5	-2	cytosol	C04409	7044	995	1S/C7H7NO5/c85(7(12)13)4(6(10)11)2139/h13H,8H2,(H,10,11)(H,12,13)/b21,54	0
kyn[c]	LKynurenine	C10H12N2O3	C10H12N2O3	0	cytosol	C00328	3622	16946	1S/C10H12N2O3/c11742136(7)9(13)58(12)10(14)15/h14,8H,5,1112H2,(H,14,15)/t8/m0/s1	0
hkyn[c]	3Hydroxykynurenine	C10H12N2O4	C10H12N2O4	0	cytosol	C03227	6099	0	0	0
indpyr[c]	Indolepyruvate	C11H9NO3	C11H8NO3	-1	cytosol	C00331	3625	29750	1S/C11H9NO3/c1310(11(14)15)57612942138(7)9/h14,6,12H,5H2,(H,14,15)	0
apdob[c]	4(2Aminophenyl)2,4dioxobutanoate	C10H9NO4	C10H8NO4	-1	cytosol	C01252	4472	17442	1S/C10H9NO4/c11742136(7)8(12)59(13)10(14)15/h14H,5,11H2,(H,14,15)/p1	0
ahpdob[c]	4(2Amino3hydroxyphenyl)2,4dioxobutanoate	C10H9NO5	C10H8NO5	-1	cytosol	C05645	7956	27593	1S/C10H9NO5/c1195(2136(9)12)7(13)48(14)10(15)16/h13,12H,4,11H2,(H,15,16)/p1	0
fan[c]	Formylanthranilate	C8H7NO3	C8H6NO3	-1	cytosol	C05653	7964	36575	1S/C8H7NO3/c1059742136(7)8(11)12/h15H,(H,9,10)(H,11,12)/p1	0
an[c]	Anthranilate	C7H7NO2	C7H6NO2	-1	cytosol	C00108	3408	30754	1S/C7H7NO2/c8642135(6)7(9)10/h14H,8H2,(H,9,10)	0
qa[c]	Quinolinate	C7H5NO4	C7H3NO4	-2	cytosol	C03722	6487	29959	1S/C7H5NO4/c96(10)421385(4)7(11)12/h13H,(H,9,10)(H,11,12)/p2	0
dhsk[c]	3Dehydroshikimate	C7H8O5	C7H7O5	-1	cytosol	C02637	5617	30918	1S/C7H8O5/c8413(7(11)12)25(9)6(4)10/h1,56,910H,2H2,(H,11,12)/t5,6/m1/s1	0
sme[c]	Shikimate	C7H10O5	C7H9O5	-1	cytosol	C00493	3776	16119	1S/C7H10O5/c8413(7(11)12)25(9)6(4)10/h1,46,810H,2H2,(H,11,12)/t4,5,6/m1/s1	0
phen[c]	Prephenate	C10H10O6	C10H8O6	-2	cytosol	C00254	3553	29934	1S/C10H10O6/c1161310(426,9(15)16)57(12)8(13)14/h14,6,11H,5H2,(H,13,14)(H,15,16)	0
npran[c]	N(5PhosphobetaDribosyl)anthranilic acid	C12H16NO9P	C12H13NO9P	-3	cytosol	C04302	6961	7091	1S/C12H16NO9P/c1498(52123(18,19)20)2211(10(9)15)13742136(7)12(16)17/h14,811,1315H,5H2,(H,16,17)(H2,18,19,20)/t8,9,10,11/m1/s1	0
sme5p[c]	Shikimate 5phosphate	C7H11O8P	C7H8O8P	-3	cytosol	C03175	6057	17052	1S/C7H11O8P/c8413(7(10)11)25(6(4)9)1516(12,13)14/h2,46,89H,1H2,(H,10,11)(H2,12,13,14)/p3/t4,5,6+/m1/s1	0
3psme[c]	5O(1Carboxyvinyl)3phosphoshikimic acid	C10H13O10P	C10H9O10P	-4	cytosol	C01269	4488	16257	1S/C10H13O10P/c14(9(12)13)19625(10(14)15)37(8(6)11)2021(16,17)18/h3,68,11H,12H2,(H,12,13)(H,14,15)(H2,16,17,18)/t6,7,8+/m1/s1	0
3ddah7p[c]	2Dehydro3deoxyDarabinoheptonate 7phosphate	C7H13O10P	C7H10O10P	-3	cytosol	C04691	7271	18150	1S/C7H13O10P/c83(14(9)7(12)13)6(11)5(10)21718(14,15)16/h3,56,8,1011H,12H2,(H,12,13)(H2,14,15,16)/t3,5,6+/m1/s1	0
chor[c]	Chorismate	C10H10O6	C10H8O6	-2	cytosol	C00251	3550	17333	1S/C10H10O6/c15(9(12)13)16846(10(14)15)237(8)11/h24,78,11H,1H2,(H,12,13)(H,14,15)/t7,8/m1/s1	0
trn[c]	Tryptamine	C10H12N2	C10H13N2	1	cytosol	C00398	3688	16765	1S/C10H12N2/c116587121042139(8)10/h14,7,12H,56,11H2/p+1	0
cpad5p[c]	1(2Carboxyphenylamino)1deoxyDribulose 5phosphate	C12H16NO9P	C12H13NO9P	-3	cytosol	C01302	4520	29112	1S/C12H16NO9P/c149(11(16)10(15)62223(19,20)21)513842137(8)12(17)18/h14,1011,13,1516H,56H2,(H,17,18)(H2,19,20,21)/t10,11+/m1/s1	0
dqt[c]	3Dehydroquinate	C7H10O6	C7H9O6	-1	cytosol	C00944	4196	17947	1S/C7H10O6/c8317(13,6(11)12)24(9)5(3)10/h3,5,8,10,13H,12H2,(H,11,12)/t3,5+,7/m1/s1	0
am6sa[c]	2Aminomuconate semialdehyde	C6H7NO3	C6H7NO3	0	cytosol	C03824	0	15745	1S/C6H7NO3/c75(6(9)10)31248/h14H,7H2,(H,9,10)/b21,53+	0
nsprd[c]	NAcetyldiamine	C2H6N2O(CH2)n	C2H6N2O(CH2)n	0	cytosol	c02297	5352	35414	0	0
hpp[m]	3Hydroxypropanoate	C3H6O3	C3H5O3	-1	mitochondrion	C01013	4258	33404	1S/C3H6O3/c4213(5)6/h4H,12H2,(H,5,6)/p1	0
opp[m]	3Oxopropanoate	C3H4O3	C3H3O3	-1	mitochondrion	C00222	3522	17960	1S/C3H4O3/c4213(5)6/h2H,1H2,(H,5,6)/p1	0
bala[c]	BetaAlanine	C3H7NO2	C3H7NO2	0	cytosol	C00099	3399	16958	1S/C3H7NO2/c4213(5)6/h12,4H2,(H,5,6)	0
aproa[m]	3Aminopropanal	C3H7NO	C3H8NO	1	mitochondrion	C05665	7975	18090	1S/C3H7NO/c42135/h3H,12,4H2	0
bala[m]	BetaAlanine	C3H7NO2	C3H7NO2	0	mitochondrion	C00099	3399	16958	1S/C3H7NO2/c4213(5)6/h12,4H2,(H,5,6)	0
ppecoa[m]	PropenoylCoA	C24H38N7O17P3S	C24H34N7O17P3S	-4	mitochondrion	C00894	4150	57367	1S/C24H38N7O17P3S/c1415(33)52872614(32)562722(36)19(35)24(2,3)104551(42,43)4850(40,41)4491318(4749(37,38)39)17(34)23(4613)3112301620(25)28112921(16)31/h4,1113,1719,23,3435H,1,510H2,23H3,(H,26,32)(H,27,36)(H,40,41)(H,42,43)(H2,25,28,29)(H2,37,38,39)/p4/t13,17,18,19+,23/m1/s1	0
hcoa[m]	3HydroxypropionylCoA	C24H40N7O18P3S	C24H36N7O18P3S	-4	mitochondrion	C05668	7976	58528	1S/C24H40N7O18P3S/c124(2,19(36)22(37)275314(33)26685315(34)4732)104652(43,44)4951(41,42)4591318(4850(38,39)40)17(35)23(4713)3112301620(25)28112921(16)31/h1113,1719,23,32,3536H,310H2,12H3,(H,26,33)(H,27,37)(H,41,42)(H,43,44)(H2,25,28,29)(H2,38,39,40)/p4/t13,17,18,19+,23/m1/s1	0
semet[m]	LSelenomethionine	C5H11NO2Se	C5H11NO2Se	0	mitochondrion	C05335	0	0	1S/C5H11NO2Se/c19324(6)5(7)8/h4H,23,6H2,1H3,(H,7,8)	0
msel[m]	Methaneselenol	CH4Se	CH4Se	0	mitochondrion	C05703	0	0	0	0
semsc[m]	SeMethylLselenocysteine	C4H9NO2Se	C4H9NO2Se	0	mitochondrion	C05689	0	0	0	0
selt[c]	Selenite	H2SeO3	SeO3	-2	cytosol	C05684	0	18212	1S/H2O3Se/c14(2)3/h(H2,1,2,3)/p2	0
seld[c]	Hydrogen selenide	H2Se	HSe	-1	cytosol	C01528	0	16503	1S/H2Se/h1H2	0
msea[c]	Methylselenic acid	CH4O2Se	CH3O2Se	-1	cytosol	C18902	0	0	0	0
msel[c]	Methaneselenol	CH4Se	CH4Se	0	cytosol	C05703	0	0	0	0
selnt[c]	Selenate	H2O4Se	O4Se	-2	cytosol	C05697	0	15075	1S/H2O4Se/c15(2,3)4/h(H2,1,2,3,4)/p2	0
aselnt[c]	Adenylyl selenate	C10H14N5O10PSe	C10H13N5O10PSe	-1	cytosol	C05686	0	0	1S/C10H14N5O10PSe/c11859(132128)15(3145)107(17)6(16)4(2410)12326(18,19)2527(20,21)22/h24,67,10,1617H,1H2,(H,18,19)(H2,11,12,13)(H,20,21,22)/p1/t4,6,7,10/m0/s1	0
fero[c]	Ferrocytochrome c	C42H52FeN8O6S2	C42H54FeN8O6S2	2	cytosol	C00126	3426	16928	0	0
feri[c]	Ferricytochrome c	C42H51FeN8O6S2	C42H54FeN8O6S2	3	cytosol	C00125	3425	15991	0	0
gssesg[c]	Selenodiglutathione	C20H32N6O12S2Se	C20H30N6O12S2Se	-2	cytosol	C18870	0	0	0	0
ogt[c]	glutathione disulfide	C20H32N6O12S2	C20H30N6O12S2	-2	cytosol	C00127	3427	17858	1S/C20H32N6O12S2/c219(19(35)36)1313(27)2511(17(33)23515(29)30)73940812(18(34)24616(31)32)2614(28)4210(22)20(37)38/h912H,18,2122H2,(H,23,33)(H,24,34)(H,25,27)(H,26,28)(H,29,30)(H,31,32)(H,35,36)(H,37,38)/t9,10,11,12/m0/s1	0
gsseh[c]	Glutathioselenol	C10H17N3O6SSe	C10H16N3O6SSe	-1	cytosol	C18871	124489543	64729	0	0
mnag[c]	1Methyl seleno Nacetyl Dgalactosamine	C9H17NO5Se	C9H17NO5Se	0	cytosol	C18893	124489565	77010	0	0
mtrna[m]	tRNA(Met)	HOX	HOX	0	mitochondrion	C01647	4796	29173	0	0
selemettrna[m]	SelenomethionyltRNA(Met)	C20H30N6O11PSeR	C20H30N6O11PSeR	0	mitochondrion	C05336	0	0	0	0
shsys[c]	Selenohomocysteine	C4H9NO2Se	C4H8NO2Se	-1	cytosol	C05698	0	0	1S/C4H9NO2Se/c53(128)4(6)7/h3,8H,12,5H2,(H,6,7)	0
mthptglu[c]	5MethyltetrahydropteroyltriLglutamate	C30H39N9O12	C30H39N9O12	0	Cytosol	C04489	0	17614	1S/C30H39N9O12/c13916(13332423(39)26(45)3830(31)3724)1232154214(3515)25(44)3619(29(50)51)71021(41)3417(27(46)47)6920(40)3518(28(48)49)81122(42)43/h25,1619,32H,613H2,1H3,(H,34,41)(H,35,40)(H,36,44)(H,42,43)(H,46,47)(H,48,49)(H,50,51)(H4,31,33,37,38,45)/t16,17,18,19/m0/s1	0
semet[c]	LSelenomethionine	C5H11NO2Se	C5H11NO2Se	0	cytosol	C05335	0	0	1S/C5H11NO2Se/c19324(6)5(7)8/h4H,23,6H2,1H3,(H,7,8)	0
thptglu[c]	TetrahydropteroyltriLglutamate	C29H37N9O12	C29H33N9O12	-4	cytosol	C04144	6829	58140	1S/C29H37N9O12/c3029372322(25(44)3829)3315(123223)1131143113(2414)24(43)3618(28(49)50)6920(40)3416(26(45)46)5819(39)3517(27(47)48)71021(41)42/h14,1518,31,33H,512H2,(H,34,40)(H,35,39)(H,36,43)(H,41,42)(H,45,46)(H,47,48)(H,49,50)(H4,30,32,37,38,44)/p4/t15,16,17,18/m0/s1	0
scyst[c]	LSelenocystathionine	C7H14N2O4Se	C7H14N2O4Se	0	cytosol	C05699	0	27760	1S/C7H14N2O4Se/c84(6(10)11)121435(9)7(12)13/h45H,13,89H2,(H,10,11)(H,12,13)/t4,5/m0/s1	0
ophser[c]	OPhosphorylhomoserine	C4H10NO6P	C4H8NO6P	-2	cytosol	C05702	8009	21969	0	0
scys[c]	LSelenocysteine	C3H7NO2Se	C3H7NO2Se	0	cytosol	C05688	0	9093	1S/C3H7NO2Se/c42(17)3(5)6/h2,7H,1,4H2,(H,5,6)	0
dorn[c]	DOrnithine	C5H12N2O2	C5H13N2O2	1	cytosol	C00515	0	0	0	0
5a2opa[c]	5Amino2oxopentanoic acid	C5H9NO3	C5H9NO3	0	cytosol	C01110	4342	49268	0	0
darg[c]	DArginine	C6H14N4O2	C6H15N4O2	1	cytosol	C00792	4050	15816	0	0
5g2ot[c]	5Guanidino2oxopentanoate	C6H11N3O3	C6H11N3O3	0	cytosol	C03771	6525	28116	0	0
5opro[c]	5oxoproline	C5H7NO3	C5H6NO3	-1	cytosol	C01879	4992	18183	0	0
gc[c]	LgammaGlutamylcysteine	C8H14N2O5S	C8H13N2O5S	-1	cytosol	C00669	3938	17515	1S/C8H14N2O5S/c94(7(12)13)126(11)105(316)8(14)15/h45,16H,13,9H2,(H,10,11)(H,12,13)(H,14,15)/t4,5/m0/s1	0
gsh[e]	Glutathione	C10H17N3O6S	C10H16N3O6S	-1	extracellular	C00051	3353	16856	1S/C10H17N3O6S/c115(10(18)19)127(14)136(420)9(17)1238(15)16/h56,20H,14,11H2,(H,12,17)(H,13,14)(H,15,16)(H,18,19)/t5,6/m0/s1	0
rx[e]	Organic halide	RX	RX	0	extracellular	C01322	4535	17792	0	0
hx[e]	Hydrogen halide	HX	X	-1	extracellular	C00462	3746	16042	0	0
rglutt[e]	RSGlutathione	C10H16N3O6SR	C10H15N3O6SR	-1	extracellular	C02320	5373	17021	0	0
gsh[m]	Glutathione	C10H17N3O6S	C10H16N3O6S	-1	mitochondrion	C00051	3353	16856	1S/C10H17N3O6S/c115(10(18)19)127(14)136(420)9(17)1238(15)16/h56,20H,14,11H2,(H,12,17)(H,13,14)(H,15,16)(H,18,19)/t5,6/m0/s1	0
rx[m]	Organic halide	RX	RX	0	mitochondrion	C01322	4535	17792	0	0
hx[m]	Hydrogen halide	HX	X	-1	mitochondrion	C00462	3746	16042	0	0
rglutt[m]	RSGlutathione	C10H16N3O6SR	C10H15N3O6SR	-1	mitochondrion	C02320	5373	17021	0	0
rx[c]	Organic halide	RX	RX	0	cytosol	C01322	4535	17792	0	0
hx[c]	Hydrogen halide	HX	X	-1	cytosol	C00462	3746	16042	0	0
rglutt[c]	RSGlutathione	C10H16N3O6SR	C10H15N3O6SR	-1	cytosol	C02320	5373	17021	0	0
gssg[c]	Oxidized glutathione	C20H32N6O12S2	C20H28N6O12S2	-2	cytosol	c00127	3427	17858	1S/C20H32N6O12S2/c219(19(35)36)1313(27)2511(17(33)23515(29)30)73940812(18(34)24616(31)32)2614(28)4210(22)20(37)38/h912H,18,2122H2,(H,23,33)(H,24,34)(H,25,27)(H,26,28)(H,29,30)(H,31,32)(H,35,36)(H,37,38)/t9,10,11,12/m0/s1	0
gssg[m]	Oxidized glutathione	C20H32N6O12S2	C20H28N6O12S2	-2	mitochondrion	c00127	3427	17858	1S/C20H32N6O12S2/c219(19(35)36)1313(27)2511(17(33)23515(29)30)73940812(18(34)24616(31)32)2614(28)4210(22)20(37)38/h912H,18,2122H2,(H,23,33)(H,24,34)(H,25,27)(H,26,28)(H,29,30)(H,31,32)(H,35,36)(H,37,38)/t9,10,11,12/m0/s1	0
cyst[c]	cystine	C6H12N2O4S2	C6H12N2O4S2	0	cytosol	C01420	4607	0	0	0
cgly[m]	CysGly	C5H10N2O3S	C5H10N2O3S	0	mitochondrion	C01419	4606	4047	1S/C5H10N2O3S/c63(211)5(10)714(8)9/h3,11H,12,6H2,(H,7,10)(H,8,9)/t3/m0/s1	0
rscg[m]	RSCysteinylglycine	C5H9N2O3SR	C5H9N2O3SR	0	mitochondrion	C05729	8031	8744	0	0
cgly[c]	CysGly	C5H10N2O3S	C5H10N2O3S	0	cytosol	C01419	4606	4047	1S/C5H10N2O3S/c63(211)5(10)714(8)9/h3,11H,12,6H2,(H,7,10)(H,8,9)/t3/m0/s1	0
rscg[c]	RSCysteinylglycine	C5H9N2O3SR	C5H9N2O3SR	0	cytosol	C05729	8031	8744	0	0
rcys[c]	RSCysteine	C3H6NO2SR	C3H6NO2SR	0	cytosol	C05726	8029	47910	0	0
tmp[c]	Trimetaphosphate	H3O9P3	O9P3	-3	cytosol	C02466	5482	57801	1S/H3O9P3/c110(2)711(3,4)912(5,6)810/h(H,1,2)(H,3,4)(H,5,6)/p3	0
pppi[c]	Inorganic triphosphate	H5O10P3	HO10P3	-4	cytosol	C00536	3818	48316	1S/H5O10P3/c111(2,3)913(7,8)1012(4,5)6/h(H,7,8)(H2,1,2,3)(H2,4,5,6)/p4	0
k[e]	Potassium	K	K+	1	extracellular	C00238	3537	29103	1S/K/q+1	0
na[c]	Sodium	Na	Na+	1	cytosol	C01330	4541	29101	1S/Na/q+1	0
k[c]	Potassium	K	K+	1	cytosol	C00238	3537	29103	1S/K/q+1	0
na[e]	Sodium	Na	Na+	1	extracellular	C01330	4541	29101	1S/Na/q+1	0
meoh[c]	Methanol	CH4O	CH4O	0	cytosol	C00132	0	0	0	0
fald[c]	Formaldehyde	CH2O	CH2O	0	cytosol	C00067	3367	16842	1S/CH2O/c12/h1H2	0
hygta[c]	s(hydroxymethyl)glutathione	C11H19N3O7S	C11H18N3O7S	-1	cytosol	C14180	0	0	0	0
nnme[c]	5,10Methylenetetrahydromethanopterin	C31H45N6O16P	C31H42N6O16P	-3	cytosol	C04377	7018	16568	0	0
thmpt[c]	5,6,7,8Tetrahydromethanopterin	C30H45N6O16P	C30H42N6O16P	-3	cytosol	C01217	4439	17321	0	0
glyn[c]	glycerone	C3H6O3	C3H6O3	0	cytosol	C00184	3484	16016	1S/C3H6O3/c413(6)25/h45H,12H2	0
hno3[c]	Nitrate	HNO3	NO3	-1	cytosol	C00244	3543	48107	1S/NO3/c21(3)4/q1	0
hno2[c]	Nitrite	HNO2	NO2	-1	cytosol	C00088	3388	16301	1S/HNO2/c213/h(H,2,3)/p1	0
nh4oh[c]	ammonium hydroxide	H5NO	H6NO	1	cytosol	C01358	4561	0	0	0
cya[c]	Cyanate	CHNO	CNO	-1	cytosol	C01417	4604	28024	1S/CHNO/c213/h3H/p1	0
cbm[c]	Carbamate	CH3NO2	CH2NO2	-1	cytosol	C01563	4721	28616	1S/CH3NO2/c21(3)4/h2H2,(H,3,4)/p1	0
slfi[c]	Sulfite	H2O3S	O3S	-2	cytosol	C00094	3394	48854	1S/H2O3S/c14(2)3/h(H2,1,2,3)	0
slf[c]	sulfate	H2O4S	O4S	-2	cytosol	C00059	0	0	0	0
paps[c]	3phospho5adenylyl sulfate	C10H15N5O13P2S	C10H11N5O13P2S	-4	cytosol	C00053	3355	17980	1S/C10H15N5O13P2S/c11859(132128)15(3145)106(16)7(2729(17,18)19)4(2610)12530(20,21)2831(22,23)24/h24,67,10,16H,1H2,(H,20,21)(H2,11,12,13)(H2,17,18,19)(H,22,23,24)/t4,6,7,10/m1/s1	0
rthio[c]	Thioredoxin	C10H14N4O4S2R4	C10H15N4O4S2R4	1	cytosol	C00342	3635	15967	0	0
pap[c]	Adenosine 3',5'bisphosphate	C10H15N5O10P2	C10H11N5O10P2	-4	cytosol	C00054	3356	58343	1S/C10H15N5O10P2/c11859(132128)15(3145)106(16)7(2527(20,21)22)4(2410)12326(17,18)19/h24,67,10,16H,1H2,(H2,11,12,13)(H2,17,18,19)(H2,20,21,22)/p4/t4,6,7,10/m1/s1	0
othio[c]	Thioredoxin disulfide	C10H12N4O4S2R4	C10H13N4O4S2R4	1	cytosol	C00343	3636	18191	0	0
aps[c]	Adenylyl sulfate	C10H14N5O10PS	C10H12N5O10PS	-2	cytosol	C00224	3524	17709	1S/C10H14N5O10PS/c11859(132128)15(3145)107(17)6(16)4(2410)12326(18,19)2527(20,21)22/h24,67,10,1617H,1H2,(H,18,19)(H2,11,12,13)(H,20,21,22)/t4,6,7,10/m1/s1	0
slf[m]	sulfate	H2O4S	O4S	-2	mitochondrion	0	0	0	0	0
fgar[c]	5'PhosphoribosylNformylglycinamide	C8H15N2O9P	C8H13N2O9P	-2	cytosol	C04376	7017	18272	1S/C8H15N2O9P/c113915(12)1087(14)6(13)4(198)21820(15,16)17/h34,68,1314H,12H2,(H,9,11)(H,10,12)(H2,15,16,17)/t4,6,7,8?/m1/s1	0
fgam[c]	2(Formamido)N1(5'phosphoribosyl)acetamidine	C8H16N3O8P	C8H15N3O8P	-1	cytosol	C04640	7229	18413	1S/C8H16N3O8P/c95(110312)1187(14)6(13)4(198)21820(15,16)17/h34,68,1314H,12H2,(H2,9,11)(H,10,12)(H2,15,16,17)/t4,6,7,8?/m1/s1	0
air[c]	Aminoimidazole ribotide	C8H14N3O7P	C8H12N3O7P	-2	cytosol	C03373	6208	28843	1S/C8H14N3O7P/c95110311(5)87(13)6(12)4(188)21719(14,15)16/h1,34,68,1213H,2,9H2,(H2,14,15,16)/t4,6,7,8?/m1/s1	0
gar[c]	5'Phosphoribosylglycinamide	C7H15N2O8P	C7H14N2O8P	-1	cytosol	C03838	6578	18349	1S/C7H15N2O8P/c814(10)976(12)5(11)3(177)21618(13,14)15/h3,57,1112H,12,8H2,(H,9,10)(H2,13,14,15)/t3,5,6,7?/m1/s1	0
cair[c]	1(5PhosphoDribosyl)5amino4imidazolecarboxylate	C9H14N3O9P	C9H11N3O9P	-3	cytosol	C04751	7321	28413	1S/C9H14N3O9P/c1074(9(15)16)11212(7)86(14)5(13)3(218)12022(17,18)19/h23,56,8,1314H,1,10H2,(H,15,16)(H2,17,18,19)/t3,5,6,8/m1/s1	0
gmp[c]	GMP	C10H14N5O8P	C10H12N5O8P	-2	cytosol	C00144	3444	17345	1S/C10H14N5O8P/c11101374(8(18)1410)12215(7)96(17)5(16)3(239)12224(19,20)21/h23,56,9,1617H,1H2,(H2,19,20,21)(H3,11,13,14,18)/t3,5,6,9/m1/s1	0
gn[c]	guanine	C5H5N5O	C5H5N5O	0	cytosol	C00242	3541	16235	1S/C5H5N5O/c65932(4(11)105)7183/h1H,(H4,6,7,8,9,10,11)	0
aicad[c]	5Amino4imidazolecarboxyamide	C4H6N4O	C4H6N4O	0	cytosol	C04051	6752	2030	0	0
prfica[c]	1(5'Phosphoribosyl)5formamido4imidazolecarboxamide	C10H15N4O9P	C10H13N4O9P	-2	cytosol	C04734	7305	18381	0	0
itp[c]	ITP	C10H15N4O14P3	C10H11N4O14P3	-4	cytosol	C00081	3381	16039	1S/C10H15N4O14P3/c1564(12530(21,22)2831(23,24)2729(18,19)20)2610(7(6)16)1431358(14)112129(5)17/h24,67,10,1516H,1H2,(H,21,22)(H,23,24)(H,11,12,17)(H2,18,19,20)/t4,6,7,10/m1/s1	0
dgtp[c]	dGTP	C10H16N5O13P3	C10H12N5O13P3	-4	cytosol	C00286	3581	16497	1S/C10H16N5O13P3/c11101387(9(17)1410)12315(8)614(16)5(266)22530(21,22)2831(23,24)2729(18,19)20/h36,16H,12H2,(H,21,22)(H,23,24)(H2,18,19,20)(H3,11,13,14,17)/t4,5+,6+/m0/s1	0
dgmp[c]	dGMP	C10H14N5O7P	C10H12N5O7P	-2	cytosol	C00362	3653	16192	1S/C10H14N5O7P/c11101387(9(17)1410)12315(8)614(16)5(226)22123(18,19)20/h36,16H,12H2,(H2,18,19,20)(H3,11,13,14,17)/t4,5+,6+/m0/s1	0
xtp[c]	xanthosine 5'-triphosphate	C10H15N4O15P3	C10H11N4O15P3	-4	cytosol	C00700	0	0	0	0
xmp[c]	Xanthosine 5'phosphate	C10H13N4O9P	C10H11N4O9P	-2	cytosol	C00655	3925	15652	1S/C10H13N4O9P/c1553(12224(19,20)21)239(6(5)16)1421147(14)1210(18)138(4)17/h23,56,9,1516H,1H2,(H2,19,20,21)(H2,12,13,17,18)/t3,5,6,9/m1/s1	0
ditp[c]	dITP	C10H15N4O13P3	C10H11N4O13P3	-4	cytosol	C01345	4550	28807	0	0
dimp[c]	2'Deoxyinosine 5'phosphate	C10H13N4O7P	C10H11N4O7P	-2	cytosol	C06196	8446	28806	0	0
camp[c]	3',5'Cyclic AMP	C10H12N5O6P	C10H11N5O6P	-1	cytosol	C00575	3854	17489	1S/C10H12N5O6P/c11859(132128)15(3145)106(16)74(2010)11922(17,18)217/h24,67,10,16H,1H2,(H,17,18)(H2,11,12,13)/t4,6,7,10/m1/s1	0
cgmp[c]	3',5'Cyclic GMP	C10H12N5O7P	C10H11N5O7P	-1	cytosol	C00942	4194	16356	0	0
datp[c]	dATP	C10H16N5O12P3	C10H12N5O12P3	-4	cytosol	C00131	3431	16284	1S/C10H16N5O12P3/c119810(133129)15(4148)715(16)6(257)22429(20,21)2730(22,23)2628(17,18)19/h37,16H,12H2,(H,20,21)(H,22,23)(H2,11,12,13)(H2,17,18,19)/t5,6+,7+/m0/s1	0
dadp[c]	dADP	C10H15N5O9P2	C10H12N5O9P2	-3	cytosol	C00206	3506	16174	1S/C10H15N5O9P2/c119810(133129)15(4148)715(16)6(237)22226(20,21)2425(17,18)19/h37,16H,12H2,(H,20,21)(H2,11,12,13)(H2,17,18,19)/t5,6+,7+/m0/s1	0
dgdp[c]	dGDP	C10H15N5O10P2	C10H12N5O10P2	-3	cytosol	C00361	3652	28862	1S/C10H15N5O10P2/c11101387(9(17)1410)12315(8)614(16)5(246)22327(21,22)2526(18,19)20/h36,16H,12H2,(H,21,22)(H2,18,19,20)(H3,11,13,14,17)/t4,5+,6+/m0/s1	0
pppgpp[c]	Guanosine 3'diphosphate 5'triphosphate	C10H18N5O20P5	C10H12N5O20P5	-6	cytosol	C04494	7111	16690	0	0
ppgpp[c]	Guanosine 3',5'bis(diphosphate)	C10H17N5O17P4	C10H12N5O17P4	-5	cytosol	C01228	4450	17633	0	0
adn[c]	Adenosine	C10H13N5O4	C10H13N5O4	0	cytosol	C00212	3512	16335	1S/C10H13N5O4/c11859(132128)15(3145)107(18)6(17)4(116)1910/h24,67,10,1618H,1H2,(H2,11,12,13)/t4,6,7,10/m1/s1	0
inos[c]	inosine	C10H12N4O5	C10H12N4O5	0	cytosol	C00294	0	0	0	0
hyxn[c]	hypoxanthine	C5H4N4O	C5H4N4O	0	cytosol	C00262	3560	17368	1S/C5H4N4O/c10534(7163)8295/h12H,(H2,6,7,8,9,10)	0
dg[c]	Deoxyguanosine	C10H13N5O4	C10H13N5O4	0	cytosol	C00330	3624	17172	1S/C10H13N5O4/c11101387(9(18)1410)12315(8)614(17)5(216)196/h36,1617H,12H2,(H3,11,13,14,18)/t4,5+,6+/m0/s1	0
dr1p[c]	2DeoxyDribose 1phosphate	C5H11O7P	C5H9O7P	-2	cytosol	C00672	3941	28542	1S/C5H11O7P/c6243(7)15(114)1213(8,9)10/h37H,12H2,(H2,8,9,10)/t3,4+,5?/m0/s1	0
gsn[c]	guanosine	C10H13N5O5	C10H13N5O5	0	cytosol	C00387	3677	16750	1S/C10H13N5O5/c11101374(8(19)1410)12215(7)96(18)5(17)3(116)209/h23,56,9,1618H,1H2,(H3,11,13,14,19)/t3,5,6,9/m1/s1	0
xtsine[c]	xanthosine	C10H12N4O6	C10H12N4O6	0	cytosol	C01762	4895	18107	1S/C10H12N4O6/c15135(16)6(17)9(203)1421147(14)1210(19)138(4)18/h23,56,9,1517H,1H2,(H2,12,13,18,19)/t3,5,6,9/m1/s1	0
xan[c]	Xanthine	C5H4N4O2	C5H4N4O2	0	cytosol	C00385	3675	17712	1S/C5H4N4O2/c10423(7162)85(11)94/h1H,(H3,6,7,8,9,10,11)	0
2dan[c]	Deoxyadenosine	C10H13N5O3	C10H13N5O3	0	cytosol	C00559	3839	17256	1S/C10H13N5O3/c119810(133129)15(4148)715(17)6(216)187/h37,1617H,12H2,(H2,11,12,13)/t5,6+,7+/m0/s1	0
din[c]	Deoxyinosine	C10H12N4O4	C10H12N4O4	0	cytosol	C05512	7859	28997	1S/C10H12N4O4/c15265(16)17(186)1441389(14)1131210(8)17/h37,1516H,12H2,(H,11,12,17)/t5,6+,7+/m0/s1	0
damp[c]	dAMP	C10H14N5O6P	C10H12N5O6P	-2	cytosol	C00360	3651	17713	1S/C10H14N5O6P/c119810(133129)15(4148)715(16)6(217)22022(17,18)19/h37,16H,12H2,(H2,11,12,13)(H2,17,18,19)/t5,6+,7+/m0/s1	0
damp[m]	dAMP	C10H14N5O6P	C10H12N5O6P	-2	mitochondrion	C00360	3651	17713	1S/C10H14N5O6P/c119810(133129)15(4148)715(16)6(217)22022(17,18)19/h37,16H,12H2,(H2,11,12,13)(H2,17,18,19)/t5,6+,7+/m0/s1	0
dadp[m]	dADP	C10H15N5O9P2	C10H12N5O9P2	-3	mitochondrion	C00206	3506	16174	1S/C10H15N5O9P2/c119810(133129)15(4148)715(16)6(237)22226(20,21)2425(17,18)19/h37,16H,12H2,(H,20,21)(H2,11,12,13)(H2,17,18,19)/t5,6+,7+/m0/s1	0
urate[c]	Urate	C5H4N4O3	C5H4N4O3	0	cytosol	C00366	3657	17775	0	0
hiura[c]	5Hydroxyisourate	C5H4N4O4	C5H4N4O4	0	cytosol	C11821	13985	18072	0	0
houdhic[c]	5Hydroxy2oxo4ureido2,5dihydro1Himidazole5carboxylate	C5H6N4O5	C5H5N4O5	-1	cytosol	C12248	14393	31132	0	0
ratn[c]	(R)-Allantoin	C4H6N4O3	C4H6N4O3	0	cytosol	C02348	0	0	0	0
satn[c]	(S)-Allantoin	C4H6N4O3	C4H6N4O3	0	cytosol	C02350	0	0	0	0
att[c]	allantoate	C4H8N4O4	C4H7N4O4	-1	cytosol	C00499	3782	17536	1S/C4H8N4O4/c53(11)71(2(9)10)84(6)12/h1H,(H,9,10)(H3,5,7,11)(H3,6,8,12)/p1	0
ugc[c]	()Ureidoglycolate	C3H6N2O4	C3H5N2O4	-1	cytosol	C00603	3878	15412	1S/C3H6N2O4/c43(9)51(6)2(7)8/h1,6H,(H,7,8)(H3,4,5,9)/t1/m0/s1	0
apppa[c]	P1,P3Bis(5'adenosyl) triphosphate	C20H27N10O16P3	C20H24N10O16P3	-3	cytosol	C06197	8447	27775	0	0
appppa[c]	P1,P4Bis(5'adenosyl)tetraphosphate	C20H28N10O19P4	C20H24N10O19P4	-4	cytosol	C01260	4479	17422	0	0
doroa[c]	(S)Dihydroorotate	C5H6N2O4	C5H5N2O4	-1	cytosol	C00337	3630	17025	1S/C5H6N2O4/c8312(4(9)10)65(11)73/h2H,1H2,(H,9,10)(H2,6,7,8,11)/t2/m0/s1	0
oroa[c]	Orotate	C5H4N2O4	C5H3N2O4	-1	cytosol	C00295	3589	16742	1S/C5H4N2O4/c8312(4(9)10)65(11)73/h1H,(H,9,10)(H2,6,7,8,11)	0
qn[c]	Quinone	C6H4O2	C6H4O2	0	cytosol	C00472	3755	16509	0	0
hqn[c]	Hydroquinone	C6H6O2	C6H6O2	0	cytosol	C00530	3812	17594	0	0
omp[c]	Orotidine 5'phosphate	C10H13N2O11P	C10H10N2O11P	-3	cytosol	C01103	4337	15842	0	0
ump[c]	UMP	C9H13N2O9P	C9H11N2O9P	-2	cytosol	C00105	3405	16695	1S/C9H13N2O9P/c1251211(9(15)105)87(14)6(13)4(208)31921(16,17)18/h12,4,68,1314H,3H2,(H,10,12,15)(H2,16,17,18)/t4,6,7,8/m1/s1	0
cytd[c]	cytidine	C9H13N3O5	C9H13N3O5	0	cytosol	C00475	3758	17562	1S/C9H13N3O5/c1051212(9(16)115)87(15)6(14)4(313)178/h12,4,68,1315H,3H2,(H2,10,11,16)/t4,6,7,8/m1/s1	0
cmp[c]	CMP	C9H14N3O8P	C9H12N3O8P	-2	cytosol	C00055	3357	17361	1S/C9H14N3O8P/c1051212(9(15)115)87(14)6(13)4(208)31921(16,17)18/h12,4,68,1314H,3H2,(H2,10,11,15)(H2,16,17,18)/t4,6,7,8/m1/s1	0
idp[c]	IDP	C10H14N4O11P2	C10H11N4O11P2	-3	cytosol	C00104	3404	17808	1S/C10H14N4O11P2/c1564(12327(21,22)2526(18,19)20)2410(7(6)16)1431358(14)112129(5)17/h24,67,10,1516H,1H2,(H,21,22)(H,11,12,17)(H2,18,19,20)/t4,6,7,10/m1/s1	0
uri[c]	uridine	C9H12N2O6	C9H12N2O6	0	cytosol	C00299	3593	16704	1S/C9H12N2O6/c12346(14)7(15)8(174)11215(13)109(11)16/h12,4,68,12,1415H,3H2,(H,10,13,16)/t4,6,7,8/m1/s1	0
dttp[c]	dTTP	C10H17N2O14P3	C10H13N2O14P3	-4	cytosol	C00459	3743	18077	1S/C10H17N2O14P3/c15312(10(15)119(5)14)826(13)7(248)42328(19,20)2629(21,22)2527(16,17)18/h3,68,13H,2,4H2,1H3,(H,19,20)(H,21,22)(H,11,14,15)(H2,16,17,18)/t6,7+,8+/m0/s1	0
dtdp[c]	dTDP	C10H16N2O11P2	C10H13N2O11P2	-3	cytosol	C00363	3654	18075	1S/C10H16N2O11P2/c15312(10(15)119(5)14)826(13)7(228)42125(19,20)2324(16,17)18/h3,68,13H,2,4H2,1H3,(H,19,20)(H,11,14,15)(H2,16,17,18)/t6,7+,8+/m0/s1	0
dctp[c]	dCTP	C9H16N3O13P3	C9H12N3O13P3	-4	cytosol	C00458	3742	16311	1S/C9H16N3O13P3/c1071212(9(14)117)835(13)6(238)42227(18,19)2528(20,21)2426(15,16)17/h12,56,8,13H,34H2,(H,18,19)(H,20,21)(H2,10,11,14)(H2,15,16,17)/t5,6+,8+/m0/s1	0
dcdp[c]	dCDP	C9H15N3O10P2	C9H12N3O10P2	-3	cytosol	C00705	3972	28846	1S/C9H15N3O10P2/c1071212(9(14)117)835(13)6(218)42024(18,19)2223(15,16)17/h12,56,8,13H,34H2,(H,18,19)(H2,10,11,14)(H2,15,16,17)/t5,6+,8+/m0/s1	0
dutp[c]	dUTP	C9H15N2O14P3	C9H11N2O14P3	-4	cytosol	C00460	3744	17625	1S/C9H15N2O14P3/c12538(11217(13)109(11)14)236(5)42227(18,19)2528(20,21)2426(15,16)17/h12,56,8,12H,34H2,(H,18,19)(H,20,21)(H,10,13,14)(H2,15,16,17)/t5,6+,8+/m0/s1	0
dudp[c]	dUDP	C9H14N2O11P2	C9H11N2O11P2	-3	cytosol	C01346	4551	28850	1S/C9H14N2O11P2/c12538(11217(13)109(11)14)216(5)42024(18,19)2223(15,16)17/h12,56,8,12H,34H2,(H,18,19)(H,10,13,14)(H2,15,16,17)/t5,6+,8+/m0/s1	0
uri[m]	uridine	C9H12N2O6	C9H12N2O6	0	mitochondrion	C00299	3593	16704	1S/C9H12N2O6/c12346(14)7(15)8(174)11215(13)109(11)16/h12,4,68,12,1415H,3H2,(H,10,13,16)/t4,6,7,8/m1/s1	0
ura[m]	uracil	C4H4N2O2	C4H4N2O2	0	mitochondrion	C00106	3406	17568	1S/C4H4N2O2/c731254(8)63/h12H,(H2,5,6,7,8)	0
r1p[m]	DRibose 1phosphate	C5H11O8P	C5H9O8P	-2	mitochondrion	C00620	3894	35425	1S/C5H11O8P/c6123(7)4(8)5(122)1314(9,10)11/h28H,1H2,(H2,9,10,11)/t2,3,4,5?/m1/s1	0
du[m]	Deoxyuridine	C9H12N2O5	C9H12N2O5	0	mitochondrion	C00526	3809	16450	1S/C9H12N2O5/c12465(13)38(166)11217(14)109(11)15/h12,56,8,1213H,34H2,(H,10,14,15)/t5,6+,8?/m0/s1	0
dr1p[m]	2DeoxyDribose 1phosphate	C5H11O7P	C5H9O7P	-2	mitochondrion	C00672	3941	28542	1S/C5H11O7P/c6243(7)15(114)1213(8,9)10/h37H,12H2,(H2,8,9,10)/t3,4+,5?/m0/s1	0
rib[m]	DRibose	C5H10O5	C5H10O5	0	mitochondrion	C00121	3421	16988	1S/C5H10O5/c6123(7)4(8)5(9)102/h29H,1H2/t2,3,4,5?/m1/s1	0
ura[c]	uracil	C4H4N2O2	C4H4N2O2	0	cytosol	C00106	3406	17568	1S/C4H4N2O2/c731254(8)63/h12H,(H2,5,6,7,8)	0
dc[c]	Deoxycytidine	C9H13N3O4	C9H13N3O4	0	cytosol	C00881	4137	15698	1S/C9H13N3O4/c1071212(9(15)117)835(14)6(413)168/h12,56,8,1314H,34H2,(H2,10,11,15)/t5,6+,8+/m0/s1	0
du[c]	Deoxyuridine	C9H12N2O5	C9H12N2O5	0	cytosol	C00526	3809	16450	1S/C9H12N2O5/c12465(13)38(166)11217(14)109(11)15/h12,56,8,1213H,34H2,(H,10,14,15)/t5,6+,8?/m0/s1	0
cyts[c]	cytosine	C4H5N3O	C4H5N3O	0	cytosol	C00380	3670	16040	1S/C4H5N3O/c531264(8)73/h12H,(H3,5,6,7,8)	0
puri5p[c]	Pseudouridine 5'phosphate	C9H13N2O9P	C9H11N2O9P	-2	cytosol	C01168	4395	18116	1S/C9H13N2O9P/c1254(21921(16,17)18)207(6(5)13)31109(15)118(3)14/h1,47,1213H,2H2,(H2,16,17,18)(H2,10,11,14,15)/t4,5,6,7+/m1/s1	0
psdine[c]	Pseudouridine	C9H12N2O6	C9H12N2O6	0	cytosol	C02067	5155	17802	0	0
ctp[c]	CTP	C9H16N3O14P3	C9H12N3O14P3	-4	cytosol	C00063	3363	17677	1S/C9H16N3O14P3/c1051212(9(15)115)87(14)6(13)4(248)32328(19,20)2629(21,22)2527(16,17)18/h12,4,68,1314H,3H2,(H,19,20)(H,21,22)(H2,10,11,15)(H2,16,17,18)/t4,6,7,8/m1/s1	0
cdp[c]	CDP	C9H15N3O11P2	C9H12N3O11P2	-3	cytosol	C00112	3412	17239	1S/C9H15N3O11P2/c1051212(9(15)115)87(14)6(13)4(228)32125(19,20)2324(16,17)18/h12,4,68,1314H,3H2,(H,19,20)(H2,10,11,15)(H2,16,17,18)/t4,6,7,8/m1/s1	0
dump[c]	dUMP	C9H13N2O8P	C9H11N2O8P	-2	cytosol	C00365	3656	17622	1S/C9H13N2O8P/c12538(11217(13)109(11)14)196(5)41820(15,16)17/h12,56,8,12H,34H2,(H,10,13,14)(H2,15,16,17)/t5,6+,8+/m0/s1	0
dtmp[c]	dTMP	C10H15N2O8P	C10H13N2O8P	-2	cytosol	C00364	3655	17013	1S/C10H15N2O8P/c15312(10(15)119(5)14)826(13)7(208)41921(16,17)18/h3,68,13H,2,4H2,1H3,(H,11,14,15)(H2,16,17,18)/t6,7+,8+/m0/s1	0
dcmp[c]	dCMP	C9H14N3O7P	C9H12N3O7P	-2	cytosol	C00239	3538	15918	1S/C9H14N3O7P/c1071212(9(14)117)835(13)6(198)41820(15,16)17/h12,56,8,13H,34H2,(H2,10,11,14)(H2,15,16,17)/t5,6+,8+/m0/s1	0
apru[c]	5Amino6(5phosphoribosylamino)uracil	C9H15N4O9P	C9H13N4O9P	-2	cytosol	C01268	4487	58453	1S/C9H15N4O9P/c1036(129(17)137(3)16)1185(15)4(14)2(228)12123(18,19)20/h2,45,8,1415H,1,10H2,(H2,18,19,20)(H3,11,12,13,16,17)/p2/t2,4,5,8/m1/s1	0
apdruci[c]	5Amino6(5phosphoribitylamino)uracil	C9H17N4O9P	C9H15N4O9P	-2	cytosol	C04454	7081	58421	1S/C9H17N4O9P/c1057(129(18)138(5)17)1113(14)6(16)4(15)22223(19,20)21/h34,6,1416H,12,10H2,(H2,19,20,21)(H3,11,12,13,17,18)/p2/t3,4+,6/m0/s1	0
aura[c]	5Amino6(Dribitylamino)uracil	C9H16N4O6	C9H16N4O6	0	cytosol	C04732	7303	15934	1S/C9H16N4O6/c1057(129(19)138(5)18)1113(15)6(17)4(16)214/h34,6,1417H,12,10H2,(H3,11,12,13,18,19)/t3,4+,6/m0/s1	0
db4p[c]	3,4Dihydroxy2butanone 4phosphate	C4H9O6P	C4H7O6P	-2	cytosol	C15556	17396548	50606	1S/C4H9O6P/c13(5)4(6)21011(7,8)9/h4,6H,2H2,1H3,(H2,7,8,9)	0
d8rl[c]	6,7Dimethyl8(1Dribityl)lumazine	C13H18N4O6	C13H18N4O6	0	cytosol	C04332	6983	17601	1S/C13H18N4O6/c156(2)17(37(19)10(21)8(20)418)119(145)12(22)1613(23)1511/h78,10,1821H,34H2,12H3,(H,16,22,23)/t7,8+,10/m0/s1	0
ribflav[c]	Riboflavin	C17H20N4O6	C17H20N4O6	0	cytosol	C00255	3554	17015	1S/C17H20N4O6/c173910(48(7)2)21(511(23)14(25)12(24)622)1513(189)16(26)2017(27)1915/h34,1112,14,2225H,56H2,12H3,(H,20,26,27)/t11,12+,14/m0/s1	0
fmn[c]	FMN	C17H21N4O9P	C17H19N4O9P	-2	cytosol	C00061	3361	17621	1S/C17H21N4O9P/c173910(48(7)2)21(1513(189)16(25)2017(26)1915)511(22)14(24)12(23)63031(27,28)29/h34,1112,14,2224H,56H2,12H3,(H,20,25,26)(H2,27,28,29)/t11,12+,14/m0/s1	0
ribflav[m]	Riboflavin	C17H20N4O6	C17H20N4O6	0	mitochondrion	C00255	3554	17015	1S/C17H20N4O6/c173910(48(7)2)21(511(23)14(25)12(24)622)1513(189)16(26)2017(27)1915/h34,1112,14,2225H,56H2,12H3,(H,20,26,27)/t11,12+,14/m0/s1	0
fmn[m]	FMN	C17H21N4O9P	C17H19N4O9P	-2	mitochondrion	C00061	3361	17621	1S/C17H21N4O9P/c173910(48(7)2)21(1513(189)16(25)2017(26)1915)511(22)14(24)12(23)63031(27,28)29/h34,1112,14,2224H,56H2,12H3,(H,20,25,26)(H2,27,28,29)/t11,12+,14/m0/s1	0
fmn[e]	FMN	C17H21N4O9P	C17H19N4O9P	-2	extracellular	C00061	3361	17621	1S/C17H21N4O9P/c173910(48(7)2)21(1513(189)16(25)2017(26)1915)511(22)14(24)12(23)63031(27,28)29/h34,1112,14,2224H,56H2,12H3,(H,20,25,26)(H2,27,28,29)/t11,12+,14/m0/s1	0
ribflav[e]	Riboflavin	C17H20N4O6	C17H20N4O6	0	extracellular	C00255	3554	17015	1S/C17H20N4O6/c173910(48(7)2)21(511(23)14(25)12(24)622)1513(189)16(26)2017(27)1915/h34,1112,14,2225H,56H2,12H3,(H,20,26,27)/t11,12+,14/m0/s1	0
pi[e]	Orthophosphate	H3O4P	HO4P	-2	extracellular	C00009	3311	18367	1S/H3O4P/c15(2,3)4/h(H3,1,2,3,4)/p2	0
d6rp5p[c]	2,5Diamino4hydroxy6(5phosphoribosylamino)pyrimidine	C9H16N5O8P	C9H14N5O8P	-2	cytosol	C01304	4522	29114	1S/C9H16N5O8P/c1036(139(11)147(3)17)1285(16)4(15)2(228)12123(18,19)20/h2,45,8,1516H,1,10H2,(H2,18,19,20)(H4,11,12,13,14,17)/t2,4,5,8/m1/s1	0
top[c]	4amino5hydroxymethyl2methylpyrimidine	C6H9N3O	C6H9N3O	0	cytosol	C01279	4498	16892	1/C6H9N3O/c14825(310)6(7)94/h2,10H,3H2,1H3,(H2,7,8,9)/f/h7H2	0
ahmp[c]	4amino2methyl5phosphomethylpyrimidine	C6H10N3O4P	C6H8N3O4P	-2	cytosol	C04556	7161	18032	1/C6H10N3O4P/c14825(6(7)94)31314(10,11)12/h2H,3H2,1H3,(H2,7,8,9)(H2,10,11,12)	0
ahmpp[c]	2Methyl4amino5hydroxymethylpyrimidine diphosphate	C6H11N3O7P2	C6H8N3O7P2	-3	cytosol	C04752	7322	16629	0	0
s[c]	sulfur	S	S	0	cytosol	c00087	3387	17909	0	0
adpemtc[c]	ADP5ethyl4methylthiazole2carboxylate	C17H22N6O12P2S	C17H21N6O12P2S	-1	cytosol	C20784	0	0	0	0
nicd[c]	Nicotinamide	C6H6N2O	C6H6N2O	0	cytosol	C00153	3453	17154	1S/C6H6N2O/c76(9)5213845/h14H,(H2,7,9)	0
cthzp[c]	2(2Carboxy4methylthiazol5yl)ethyl phosphate	C7H10NO6PS	C7H7NO6PS	-3	cytosol	C20247	0	0	0	0
thmp[c]	Thiamin monophosphate	C12H17N4O4PS	C12H16N4O4PS	-1	cytosol	C01081	4319	9533	0	0
thzp[c]	4Methyl5(2phosphoethyl)thiazole	C6H10NO4PS	C6H8NO4PS	-2	cytosol	C04327	6980	17857	0	0
thz[c]	5(2hydroxyethyl)4methylthiazole	C6H9NOS	C6H9NOS	0	cytosol	C04294	6954	17957	1S/C6H9NOS/c156(238)9475/h4,8H,23H2,1H3	0
thdp[c]	Thiamin diphosphate	C12H18N4O7P2S	C12H16N4O7P2S	-2	cytosol	C00068	3368	9532	0	0
thtp[c]	thiamin triphosphate	C12H20N4O10P3S	C12H18N4O10P3S	-2	cytosol	C03028	5933	9534	1/C12H19N4O10P3S/c1811(30716(8)6105149(2)1512(10)13)342428(20,21)2629(22,23)2527(17,18)19/h5,7H,34,6H2,12H3,(H5,13,14,15,17,18,19,20,21,22,23)/p+1/fC12H20N4O10P3S/h1718,20,22H,13H2/q+1	0
thm[c]	Thiamine	C12H17N4OS	C12H17N4OS	1	cytosol	C00378	3668	18385	0	0
pht[c]	ophospho4hydroxylthreonine	C4H10NO7P	C4H8NO7P	-2	cytosol	C06055	8325	18336	0	0
ohpb[c]	2Oxo3hydroxy4phosphobutanoate	C4H7O8P	C4H4O8P	-3	cytosol	C06054	8324	27951	0	0
hthr[c]	4hydroxyLthreonine	C4H9NO4	C4H9NO4	0	cytosol	C06056	8326	28330	0	0
dxul[c]	1DeoxyDxylulose	C5H10O4	C5H10O4	0	cytosol	C06257	8496	28354	0	0
vb6[c]	Pyridoxine	C8H11NO3	C8H11NO3	0	cytosol	C00314	3608	16709	1S/C8H11NO3/c158(12)7(411)6(310)295/h2,1012H,34H2,1H3	0
pdxal[c]	pyridoxal	C8H9NO3	C8H9NO3	0	cytosol	C00250	1050	17310	1S/C8H9NO3/c1-5-8(12)7(4-11)6(3-10)2-9-5/h2,4,10,12H,3H2,1H3	[H]C(=O)c1c(CO)cnc(C)c1O
pdxam[c]	pyridoxamine	C8H13N2O2	C8H13N2O2	1	cytosol	C00534	0	57761	1S/C8H12N2O2/c1-5-8(12)7(2-9)6(4-11)3-10-5/h3,11-12H,2,4,9H2,1H3/p+1	Cc1ncc(CO)c(C[NH3+])c1O
pdxam5pi[c]	Pyridoxamine phosphate	C8H13N2O5P	C8H12N2O5P	-1	cytosol	C00647	3919	18335	0	0
plp[c]	pyridoxal 5'-phosphate	C8H10NO6P	C8H9NO6P	-1	cytosol	C00018	3320	0	0	0
pdxi5pi[c]	pyridoxine 5'phosphate	C8H12NO6P	C8H10NO6P	-2	cytosol	C00627	3900	28803	1S/C8H12NO6P/c158(11)7(310)6(295)41516(12,13)14/h2,1011H,34H2,1H3,(H2,12,13,14)	0
nar[c]	Nicotinate Dribonucleoside	C11H13NO6	C11H14NO6	1	cytosol	C05841	8134	27748	1S/C11H13NO6/c13578(14)9(15)10(187)123126(412)11(16)17/h14,710,1315H,5H2/p+1/t7,8,9,10/m1/s1	0
nica[c]	Nicotinate	C6H5NO2	C6H4NO2	-1	cytosol	C00253	3552	15940	1S/C6H5NO2/c86(9)5213745/h14H,(H,8,9)	0
nnr[c]	NRibosylnicotinamide	C11H14N2O5	C11H15N2O5	1	cytosol	C03150	6038	15927	1S/C11H14N2O5/c1210(17)621313(46)119(16)8(15)7(514)1811/h14,79,11,1416H,5H2,(H,12,17)/p+1/t7,8,9,11/m1/s1	0
ncn[c]	Nicotinate Dribonucleotide	C11H14NO9P	C11H12NO9P	-2	cytosol	C01185	4411	15763	1S/C11H14NO9P/c1387(52022(17,18)19)2110(9(8)14)123126(412)11(15)16/h14,710,1314H,5H2,(H2,15,16,17,18,19)/p+1/t7,8,9,10/m1/s1	0
nmn[c]	Nicotinamide Dribonucleotide	C11H15N2O8P	C11H14N2O8P	-1	cytosol	C00455	3741	16171	1S/C11H15N2O8P/c1210(16)621313(46)119(15)8(14)7(2111)52022(17,18)19/h14,79,11,1415H,5H2,(H3,12,16,17,18,19)/t7,8,9,11/m1/s1	0
dmnad[c]	DeamidoNAD(+)	C21H27N6O15P2	C21H24N6O15P2	-2	cytosol	C00857	4114	18304	1S/C21H26N6O15P2/c22171218(2472317)27(82512)2016(31)14(29)11(4120)63944(36,37)4243(34,35)3851013(28)15(30)19(4010)263129(426)21(32)33/h14,78,1011,1316,1920,2831H,56H2,(H4,22,23,24,32,33,34,35,36,37)/p+1/t10,11,13,14,15,16,19,20/m1/s1	0
adprib[c]	ADPribose	C15H23N5O14P2	C15H21N5O14P2	-2	cytosol	C00301	3595	16960	1S/C15H23N5O14P2/c1612713(1831712)20(4197)1410(23)8(21)5(3214)13035(26,27)3436(28,29)31269(22)11(24)15(25)336/h36,811,1415,2125H,12H2,(H,26,27)(H,28,29)(H2,16,17,18)/p2/t5,6,8,9,10,11,14,15?/m1/s1	0
nicd[m]	Nicotinamide	C6H6N2O	C6H6N2O	0	mitochondrion	C00153	3453	17154	1S/C6H6N2O/c76(9)5213845/h14H,(H2,7,9)	0
nica[m]	Nicotinate	C6H5NO2	C6H4NO2	-1	mitochondrion	C00253	3552	15940	1S/C6H5NO2/c86(9)5213745/h14H,(H,8,9)	0
akp[m]	2Dehydropantoate	C6H10O4	C6H9O4	-1	mitochondrion	C00966	4217	11561	1S/C6H10O4/c16(2,37)4(8)5(9)10/h7H,3H2,12H3,(H,9,10)/p1	0
pant[m]	(R)Pantoate	C6H12O4	C6H11O4	-1	mitochondrion	C00522	3805	14737	1S/C6H12O4/c16(2,37)4(8)5(9)10/h4,78H,3H2,12H3,(H,9,10)	0
val[m]	LValine	C5H11NO2	C5H11NO2	0	mitochondrion	C00183	3483	16414	1S/C5H11NO2/c13(2)4(6)5(7)8/h34H,6H2,12H3,(H,7,8)/t4/m0/s1	0
dpcoa[c]	3DephosphoCoA	C21H35N7O13P2S	C21H33N7O13P2S	-2	cytosol	C00882	4138	15468	1S/C21H35N7O13P2S/c121(2,16(32)19(33)244312(29)235644)83943(36,37)4142(34,35)3871114(30)15(31)20(4011)2810271317(22)2592618(13)28/h911,1416,20,3032,44H,38H2,12H3,(H,23,29)(H,24,33)(H,34,35)(H,36,37)(H2,22,25,26)/t11,14,15,16+,20/m1/s1	0
acp[c]	Acylcarrier protein	C11H22N2O7PRS	C11H21N2O7PRS	-1	cytosol	C00229	3528	18359	0	0
pnto[c]	(R)Pantothenate	C9H17NO5	C9H16NO5	-1	cytosol	C00864	4121	29032	1S/C9H17NO5/c19(2,511)7(14)8(15)10436(12)13/h7,11,14H,35H2,12H3,(H,10,15)(H,12,13)/p1/t7/m0/s1	0
ppnto[c]	(R)4Phosphopantothenate	C9H18NO8P	C9H15NO8P	-3	cytosol	C03492	6304	15905	1S/C9H18NO8P/c19(2,51819(15,16)17)7(13)8(14)10436(11)12/h7,13H,35H2,12H3,(H,10,14)(H,11,12)(H2,15,16,17)/t7/m0/s1	0
pnte[c]	Pantetheine	C11H22N2O4S	C11H22N2O4S	0	cytosol	C00831	4089	16753	1S/C11H22N2O4S/c111(2,714)9(16)10(17)13438(15)125618/h9,14,16,18H,37H2,12H3,(H,12,15)(H,13,17)/t9/m0/s1	0
4ppnte[c]	Pantetheine 4phosphate	C11H23N2O7PS	C11H21N2O7PS	-2	cytosol	C01134	4365	16858	1S/C11H23N2O7PS/c111(2,72021(17,18)19)9(15)10(16)13438(14)125622/h9,15,22H,37H2,12H3,(H,12,14)(H,13,16)(H2,17,18,19)	0
apoacp[c]	Apo[acylcarrierprotein]	HOR	OR	-1	cytosol	C03688	6463	16139	0	0
ppntocys[c]	N((R)4Phosphopantothenoyl)Lcysteine	C12H23N2O9PS	C12H20N2O9PS	-3	cytosol	C04352	7001	15769	1/C12H23N2O8PS/c112(2,623(20,21)22)9(16)10(17)13438(15)147(524)11(18)19/h7,9,16,24H,36H2,12H3,(H,13,17)(H,14,15)(H,18,19)(H2,20,21,22)/t7,9/m0/s1	0
pant[c]	(R)Pantoate	C6H12O4	C6H11O4	-1	cytosol	C00522	3805	14737	1S/C6H12O4/c16(2,37)4(8)5(9)10/h4,78H,3H2,12H3,(H,9,10)	0
chcoa[c]	6carboxyhexanoylCoA	C28H46N7O19P3S	C28H41N7O19P3S	-5	cytosol	C01063	4302	15504	0	0
aona[c]	8amino7oxononanoate	C9H16NO3	C9H17NO3	0	cytosol	C01092	4327	12266	1S/C9H17NO3/c17(10)8(11)532469(12)13/h7H,26,10H2,1H3,(H,12,13)/p1	0
chcoa[m]	6carboxyhexanoylCoA	C28H46N7O19P3S	C28H41N7O19P3S	-5	mitochondrion	C01063	4302	15504	0	0
aona[m]	8amino7oxononanoate	C9H16NO3	C9H17NO3	0	mitochondrion	C01092	4327	12266	1S/C9H17NO3/c17(10)8(11)532469(12)13/h7H,26,10H2,1H3,(H,12,13)/p1	0
sam[m]	SAdenosylLmethionine	C15H22N6O5S	C15H23N6O5S	1	mitochondrion	C00019	3321	15414	1S/C15H22N6O5S/c127(327(16)15(24)25)4810(22)11(23)14(268)21620912(17)1851913(9)21/h58,1011,14,2223H,24,16H2,1H3,(H2,17,18,19,24,25)/p+1/t7,8+,10+,11+,14+,27?/m0/s1	0
samob[m]	Sadenosyl4methylthio2oxobutanoate	C15H20N5O6S	C15H19N5O6S	0	mitochondrion	C04425	7057	16490	1S/C15H19N5O6S/c127(327(21)15(24)25)4810(22)11(23)14(268)20619912(16)1751813(9)20/h56,8,1011,14,2223H,24H2,1H3,(H2,16,17,18,24,25)/t8,10,11,14,27?/m1/s1	0
danna[m]	7,8diaminononanoate	C9H20N2O2	C9H21N2O2	1	mitochondrion	C01037	4280	17830	1S/C9H20N2O2/c17(10)8(11)532469(12)13/h78H,26,1011H2,1H3,(H,12,13)/p1	0
dtb[m]	dethiobiotin	C10H18N2O3	C10H17N2O3	-1	mitochondrion	C01909	5017	16691	1/C10H18N2O3/c178(1210(15)117)532469(13)14/h78H,26H2,1H3,(H,13,14)(H2,11,12,15)/f/h1113H	0
s[m]	sulfur	S	S	0	mitochondrion	C00087	0	0	0	0
bt[m]	biotin	C10H16N2O3S	C10H15N2O3S	-1	mitochondrion	C00120	3420	15956	1S/C10H16N2O3S/c138(14)4213796(5167)1110(15)129/h67,9H,15H2,(H,13,14)(H2,11,12,15)/t6,7,9/m0/s1	0
dad5[m]	5'Deoxyadenosine	C10H13N5O3	C10H13N5O3	0	mitochondrion	C05198	7603	17319	0	0
met[m]	LMethionine	C5H11NO2S	C5H11NO2S	0	mitochondrion	C00073	3373	16643	1S/C5H11NO2S/c19324(6)5(7)8/h4H,23,6H2,1H3,(H,7,8)/t4/m0/s1	0
bt[c]	biotin	C10H16N2O3S	C10H15N2O3S	-1	cytosol	C00120	3420	15956	1S/C10H16N2O3S/c138(14)4213796(5167)1110(15)129/h67,9H,15H2,(H,13,14)(H2,11,12,15)/t6,7,9/m0/s1	0
btamp[c]	biotinyl5AMP	C20H28N7O9PS	C20H27N7O9PS	-1	cytosol	C05921	8209	3110	1S/C20H28N7O9PS/c21171418(2372217)27(82414)1916(30)15(29)10(3519)53437(32,33)3612(28)421311139(63811)2520(31)2613/h711,13,1516,19,2930H,16H2,(H,32,33)(H2,21,22,23)(H2,25,26,31)/t9,10+,11,13,15+,16+,19+/m0/s1	0
c80acp[m]	Octanoyl[acp]	C19H36N2O8PRS	C19H35N2O8PRS	-1	mitochondrion	C05752	0	0	0	0
lpacp[m]	Lipoyl[acp]	C8H13OS3R	C8H13OS3R	0	mitochondrion	C16239	0	0	0	0
pn6ol[m]	Protein N6(octanoyl)lysine	C8H16NOR	C8H16NOR	0	mitochondrion	C16236	0	0	0	0
pn6ll[m]	Protein N6(lipoyl)lysine	C8H14NOS2R	C8H14NORS2	0	mitochondrion	C16237	0	0	0	0
c80acp[c]	Octanoyl[acp]	C19H36N2O8PRS	C19H35N2O8PRS	-1	cytosol	C05752	0	0	0	0
lpacp[c]	Lipoyl[acp]	C8H13OS3R	C8H13OS3R	0	cytosol	C16239	0	0	0	0
dad5[c]	5'Deoxyadenosine	C10H13N5O3	C10H13N5O3	0	cytosol	C05198	7603	17319	0	0
apop[m]	Apoprotein	NH2R	H3NR	1	mitochondrion	C16240	0	0	0	0
acp[m]	Acylcarrier protein	C11H22N2O7PRS	C11H21N2O7PRS	-1	mitochondrion	C00229	3528	18359	0	0
lipt[c]	Lipoate	C8H14O2S2	C8H13O2S2	-1	cytosol	C00725	0	0	0	0
lipamp[c]	LipoylAMP	C18H26N5O8PS2	C18H25N5O8PS2	-1	cytosol	C16238	0	0	0	0
apop[c]	Apoprotein	NH2R	H3NR	1	cytosol	C16240	0	0	0	0
pn6ll[c]	Protein N6(lipoyl)lysine	C8H14NOS2R	C8H14NORS2	0	cytosol	C16237	0	0	0	0
cpmp[c]	cPMP	C10H14N5O8P	C10H12N5O8P	-2	cytosol	C18239	103061421	60210	0	0
fpyntp[c]	Formamidopyrimidine nucleoside triphosphate	C10H18N5O15P3	C10H15N5O15P3	-3	cytosol	C05922	8210	27985	0	0
diantp[c]	2,5Diaminopyrimidine nucleoside triphosphate	C9H18N5O14P3	C9H14N5O14P3	-4	cytosol	C05923	8211	929	0	0
diatrpao[c]	2,5Diamino6(5'triphosphoryl3',4'trihydroxy2'oxopentyl)amino4oxopyrimidine	C9H18N5O14P3	C9H14N5O14P3	-4	cytosol	C06148	8404	28003	0	0
ahtd[c]	7,8Dihydroneopterin 3'triphosphate	C9H16N5O13P3	C9H12N5O13P3	-4	cytosol	C04895	7446	18372	0	0
dhp[c]	2Amino4hydroxy6(Derythro1,2,3trihydroxypropyl)7,8dihydropteridine	C9H13N5O4	C9H13N5O4	0	cytosol	C04874	7426	17001	0	0
ahtd[e]	7,8Dihydroneopterin 3'triphosphate	C9H16N5O13P3	C9H12N5O13P3	-4	extracellular	C04895	7446	18372	0	0
dhp[e]	2Amino4hydroxy6(Derythro1,2,3trihydroxypropyl)7,8dihydropteridine	C9H13N5O4	C9H13N5O4	0	extracellular	C04874	7426	17001	0	0
d6pgc[e]	6PhosphoDgluconate	C6H13O10P	C6H10O10P	-3	extracellular	C00345	3638	48928	1S/C6H13O10P/c72(11617(13,14)15)3(8)4(9)5(10)6(11)12/h25,710H,1H2,(H,11,12)(H2,13,14,15)/t2,3,4+,5/m1/s1	0
glcna[e]	2KetoDgluconate	C6H10O7	C6H9O7	-1	extracellular	C06473	8705	27469	1S/C6H10O7/c712(8)3(9)4(10)5(11)6(12)13/h24,710H,1H2,(H,12,13)/t2,3,4+/m1/s1	0
ahhmp[c]	2Amino4hydroxy6hydroxymethyl7,8dihydropteridine	C7H9N5O2	C7H9N5O2	0	cytosol	C01300	4518	44841	0	0
abee[c]	4Aminobenzoate	C7H7NO2	C7H6NO2	-1	cytosol	C00568	3847	30753	0	0
dhpt[c]	dihydropteroate	C14H14N6O3	C14H13N6O3	-1	cytosol	C00921	4175	17839	1S/C14H14N6O3/c1514191110(12(21)2014)189(61711)5168317(248)13(22)23/h14,16H,56H2,(H,22,23)(H4,15,17,19,20,21)/p1	0
ahhmd[c]	2Amino7,8dihydro4hydroxy6(diphosphooxymethyl)pteridine	C7H11N5O8P2	C7H8N5O8P2	-3	cytosol	C04807	7369	15998	1/C7H11N5O8P2/c871154(6(13)127)103(195)21922(17,18)2021(14,15)16/h12H2,(H,17,18)(H2,14,15,16)(H4,8,9,11,12,13)	0
ahhmp[m]	2Amino4hydroxy6hydroxymethyl7,8dihydropteridine	C7H9N5O2	C7H9N5O2	0	mitochondrion	C01300	4518	44841	0	0
abee[m]	4Aminobenzoate	C7H7NO2	C7H6NO2	-1	mitochondrion	C00568	3847	30753	0	0
dhpt[m]	dihydropteroate	C14H14N6O3	C14H13N6O3	-1	mitochondrion	C00921	4175	17839	1S/C14H14N6O3/c1514191110(12(21)2014)189(61711)5168317(248)13(22)23/h14,16H,56H2,(H,22,23)(H4,15,17,19,20,21)/p1	0
ahhmd[m]	2Amino7,8dihydro4hydroxy6(diphosphooxymethyl)pteridine	C7H11N5O8P2	C7H8N5O8P2	-3	mitochondrion	C04807	7369	15998	1/C7H11N5O8P2/c871154(6(13)127)103(195)21922(17,18)2021(14,15)16/h12H2,(H,17,18)(H2,14,15,16)(H4,8,9,11,12,13)	0
[truncated: 485 more rows]

## Sheet:  General features
General features of model iZBM1060
FEATURES	iZBM1060
Genome features
Genome size (Mb)	43.3
Total open reading frames (ORFs)	16113
G+C content (%)	55.9
GSMM features
Total reactions	1404
[truncated: 9 more rows]
