# Supplementary material for: Reconstruction and Analysis of a Genome-Scale Metabolic Model of Ganoderma lucidum for Improved Extracellular Polysaccharide Production
Source: Front Microbiol. 2018 Dec 11;9:3076. doi: 10.3389/fmicb.2018.03076 (PMC6298397; doi:10.3389/fmicb.2018.03076)
Supplement: Supplementary file 4 [file Table_4.xlsx]

## Sheet: Minimal Growth Medium
Supplementary Table S4. Result of essential genes identified by FBA using minimum growth medium and fermentation medium.
Essential genes for growth							Essential genes for EPS production
Rxn name	Rxn description	Formula	LB	UB	Objective		Rxn name	Rxn description	Formula	LB	UB	Objective
ex_slf[e]	sulfate exchange	slf[e] <=>	-1000	1000	0		ex_slf[e]	sulfate exchange	slf[e] <=>	-1000	1000	0
ex_glc[e]	D-Glucose exchange	glc[e] <=>	-1	1000	0		ex_glc[e]	D-Glucose exchange	glc[e] <=>	-1	1000	0
ex_h[e]	H+ exchange	h[e] <=>	-1000	1000	0		ex_h[e]	H+ exchange	h[e] <=>	-1000	1000	0
ex_h2o[e]	H2O exchange	h2o[e] <=>	-1000	1000	0		ex_h2o[e]	H2O exchange	h2o[e] <=>	-1000	1000	0
ex_nh3[e]	Ammonia exchange	nh3[e] <=>	-1000	1000	0		ex_nh3[e]	Ammonia exchange	nh3[e] <=>	-1000	1000	0
ex_pi[e]	Phosphate exchange	pi[e] <=>	-1000	1000	0		ex_pi[e]	Phosphate exchange	pi[e] <=>	-1000	1000	0
ex_o2[e]	O2 exchange	o2[e] <=>	-1000	1000	0		ex_o2[e]	O2 exchange	o2[e] <=>	-1000	1000	0
IPS	IPS synthase	0.05717 gdpman[c] + 0.05677 udpglac[c] + 0.88092 udpglc[c] + 0.0012 udpxyl[c] + 0.0004 udpara[c] + 0.00051 dtdprmn[c] + 0.00303 gdpfuc[c] + atp[c] + h2o[c] -> IPS[c] + 0.93929 udp[c] + 0.0602 gdp[c] + 0.00051 dtdp[c] + adp[c] + pi[c]	0	1000	0		IPS	IPS synthase	0.05717 gdpman[c] + 0.05677 udpglac[c] + 0.88092 udpglc[c] + 0.0012 udpxyl[c] + 0.0004 udpara[c] + 0.00051 dtdprmn[c] + 0.00303 gdpfuc[c] + atp[c] + h2o[c] -> IPS[c] + 0.93929 udp[c] + 0.0602 gdp[c] + 0.00051 dtdp[c] + adp[c] + pi[c]	0	1000	1
biomass	Biomass fraction	67.83676 atp[c] + 67.83676 h2o[c] + 0.24508 chit[c] + 0.82138 13glucan[c] + 0.23846 14glucan[c] + 0.17023 gdpman[c] + 0.27464 ala[c] + 0.11218 arg[c] + 0.08017 asn[c] + 0.22526 asp[c] + 0.01198 cys[c] + 0.09252 gln[c] + 0.31639 glu[c] + 0.26387 gly[c] + 0.06728 his[c] + 0.12305 ile[c] + 0.16114 leu[c] + 0.12599 lys[c] + 0.05496 met[c] + 0.09328 phe[c] + 0.12958 pro[c] + 0.12918 ser[c] + 0.11687 t…	0	1000	1		biomass	Biomass fraction	67.83676 atp[c] + 67.83676 h2o[c] + 0.24508 chit[c] + 0.82138 13glucan[c] + 0.23846 14glucan[c] + 0.17023 gdpman[c] + 0.27464 ala[c] + 0.11218 arg[c] + 0.08017 asn[c] + 0.22526 asp[c] + 0.01198 cys[c] + 0.09252 gln[c] + 0.31639 glu[c] + 0.26387 gly[c] + 0.06728 his[c] + 0.12305 ile[c] + 0.16114 leu[c] + 0.12599 lys[c] + 0.05496 met[c] + 0.09328 phe[c] + 0.12958 pro[c] + 0.12918 ser[c] + 0.11687 t…	0.1	0.1	0
Single Gene Deletion	growth Rate(wild type)	growth Rate(after knock out)	Identify				Single Gene Deletion	EPS prodution Rate(wild type)	EPS prodution Rate(after knock out)	Identify
GL25699-R1	0.111294	0.111294	NE	Essential gene	119		GL25699-R1	0.0892036	0.0892036	NE	Essential gene	124
GL18551-R1	0.111294	0.111294	NE				GL18551-R1	0.0892036	0.0892036	NE
GL21313-R1	0.111294	0.0951346	NE				GL21313-R1	0.0892036	0.0892036	NE
GL30174-R1	0.111294	0.111294	NE				GL30174-R1	0.0892036	0.0892036	NE
GL24130-R1	0.111294	0.111294	NE				GL24130-R1	0.0892036	0.0892036	NE
GL23433-R1	0.111294	0.111294	NE				GL23433-R1	0.0892036	0.0892036	NE
GL20614-R1	0.111294	0.111294	NE				GL20614-R1	0.0892036	0.0892036	NE
GL20474-R1	0.111294	0.111294	NE				GL20474-R1	0.0892036	0.0892036	NE
GL24484-R1	0.111294	0.111294	NE				GL24484-R1	0.0892036	0.0892036	NE
GL21912-R1	0.111294	0	E				GL21912-R1	0.0892036	0	E
GL29739-R1	0.111294	0.101477	NE				GL29739-R1	0.0892036	0.01253	NE
GL31574-R1	0.111294	0.111294	NE				GL31574-R1	0.0892036	0.0892036	NE
GL26783-R1	0.111294	0.111294	NE				GL26783-R1	0.0892036	0.0892036	NE
GL20491-R1	0.111294	0.111294	NE				GL20491-R1	0.0892036	0.0892036	NE
GL20491-R2	0.111294	0.111294	NE				GL20491-R2	0.0892036	0.0892036	NE
GL26108-R1	0.111294	0.104757	NE				GL26108-R1	0.0892036	0.0395368	NE
GL30680-R1	0.111294	0	E				GL30680-R1	0.0892036	0	E
GL24591-R1	0.111294	0.111294	NE				GL24591-R1	0.0892036	0.0892036	NE
GL24591-R2	0.111294	0.111294	NE				GL24591-R2	0.0892036	0.0892036	NE
GL25620-R1	0.111294	0.111294	NE				GL25620-R1	0.0892036	0.0892036	NE
GL23682-R1	0.111294	0.111294	NE				GL23682-R1	0.0892036	0.0892036	NE
GL25136-R1	0.111294	0.111294	NE				GL25136-R1	0.0892036	0.0892036	NE
GL30114-R1	0.111294	0.102474	NE				GL30114-R1	0.0892036	0.0209056	NE
GL30389-R1	0.111294	0.111294	NE				GL30389-R1	0.0892036	0.0892036	NE
GL29575-R1	0.111294	0.111294	NE				GL29575-R1	0.0892036	0.0892036	NE
GL22268-R1	0.111294	0.104834	NE				GL22268-R1	0.0892036	0.0401506	NE
GL22245-R1	0.111294	0.108899	NE				GL22245-R1	0.0892036	0.0715179	NE
GL30887-R1	0.111294	0.111294	NE				GL30887-R1	0.0892036	0.0892036	NE
GL30675-R1	0.111294	0.111294	NE				GL30675-R1	0.0892036	0.0892036	NE
GL24743-R1	0.111294	0.111294	NE				GL24743-R1	0.0892036	0.0892036	NE
GL24280-R1	0.111294	0	E				GL24280-R1	0.0892036	0	E
GL18639-R1	0.111294	0.111294	NE				GL18639-R1	0.0892036	0.0892036	NE
GL20510-R1	0.111294	0.111294	NE				GL20510-R1	0.0892036	0.0892036	NE
GL21190-R1	0.111294	0.111294	NE				GL21190-R1	0.0892036	0.0892036	NE
GL21227-R1	0.111294	0.111294	NE				GL21227-R1	0.0892036	0.0892036	NE
GL21268-R1	0.111294	0.111294	NE				GL21268-R1	0.0892036	0.0892036	NE
GL22543-R1	0.111294	0.111294	NE				GL22543-R1	0.0892036	0.0892036	NE
GL23139-R1	0.111294	0.111294	NE				GL23139-R1	0.0892036	0.0892036	NE
GL23318-R1	0.111294	0.111294	NE				GL23318-R1	0.0892036	0.0892036	NE
GL23332-R1	0.111294	0.111294	NE				GL23332-R1	0.0892036	0.0892036	NE
GL23735-R1	0.111294	0.111294	NE				GL23735-R1	0.0892036	0.0892036	NE
GL27989-R1	0.111294	0.111294	NE				GL27989-R1	0.0892036	0.0892036	NE
GL27997-R1	0.111294	0.111294	NE				GL27997-R1	0.0892036	0.0892036	NE
GL30345-R1	0.111294	0.111294	NE				GL30345-R1	0.0892036	0.0892036	NE
GL30307-R1	0.111294	0.111294	NE				GL30307-R1	0.0892036	0.0892036	NE
GL25812-R1	0.111294	0.111294	NE				GL25812-R1	0.0892036	0.0892036	NE
GL26632-R1	0.111294	0.111294	NE				GL26632-R1	0.0892036	0.0892036	NE
GL31424-R1	0.111294	0.111294	NE				GL31424-R1	0.0892036	0.0892036	NE
GL31294-R1	0.111294	0.111294	NE				GL31294-R1	0.0892036	0.0892036	NE
GL20007-R1	0.111294	0.111294	NE				GL20007-R1	0.0892036	0.0892036	NE
GL22784-R1	0.111294	0.111294	NE				GL22784-R1	0.0892036	0.0892036	NE
GL26678-R1	0.111294	0.111294	NE				GL26678-R1	0.0892036	0.0892036	NE
GL30130-R1	0.111294	0.111294	NE				GL30130-R1	0.0892036	0.0892036	NE
GL30803-R1	0.111294	0.111294	NE				GL30803-R1	0.0892036	0.0892036	NE
GL15965-R1	0.111294	0.103876	NE				GL15965-R1	0.0892036	0.0321356	NE
GL22647-R1	0.111294	0.103876	NE				GL22647-R1	0.0892036	0.0321356	NE
GL15437-R1	0.111294	0	E				GL15437-R1	0.0892036	0	E
GL15912-R1	0.111294	0	E				GL15912-R1	0.0892036	0	E
GL22227-R1	0.111294	0	E				GL22227-R1	0.0892036	0	E
GL24204-R1	0.111294	0	E				GL24204-R1	0.0892036	0	E
GL20821-R1	0.111294	0	E				GL20821-R1	0.0892036	0	E
GL20259-R1	0.111294	0.111294	NE				GL20259-R1	0.0892036	0.0892036	NE
GL24555-R1	0.111294	0.111294	NE				GL24555-R1	0.0892036	0.0892036	NE
GL25890-R1	0.111294	0.111294	NE				GL25890-R1	0.0892036	0.0892036	NE
GL25890-R2	0.111294	0.111294	NE				GL25890-R2	0.0892036	0.0892036	NE
GL22137-R1	0.111294	0.111294	NE				GL22137-R1	0.0892036	0.0892036	NE
GL30076-R1	0.111294	0	E				GL30076-R1	0.0892036	0	E
GL29422-R1	0.111294	0.111294	NE				GL29422-R1	0.0892036	0.0892036	NE
GL30218-R1	0.111294	0	E				GL30218-R1	0.0892036	0	E
GL18572-R1	0.111294	0.111294	NE				GL18572-R1	0.0892036	0.0892036	NE
GL29907-R1	0.111294	0.111294	NE				GL29907-R1	0.0892036	0.0892036	NE
GL29894-R1	0.111294	0.111294	NE				GL29894-R1	0.0892036	0.0892036	NE
GL30631-R1	0.111294	0.111294	NE				GL30631-R1	0.0892036	0.0892036	NE
GL21673-R1	0.111294	0.110968	NE				GL21673-R1	0.0892036	0.0868828	NE
GL24045-R1	0.111294	0.111294	NE				GL24045-R1	0.0892036	0.0892036	NE
GL30487-R1	0.111294	0.111294	NE				GL30487-R1	0.0892036	0.0892036	NE
GL31587-R1	0.111294	0.111294	NE				GL31587-R1	0.0892036	0.0892036	NE
GL22212-R1	0.111294	0.111294	NE				GL22212-R1	0.0892036	0.0892036	NE
GL30545-R1	0.111294	0.111294	NE				GL30545-R1	0.0892036	0.0892036	NE
GL17591-R1	0.111294	0.111294	NE				GL17591-R1	0.0892036	0.0892036	NE
GL18111-R1	0.111294	0.111294	NE				GL18111-R1	0.0892036	0.0892036	NE
GL27743-R1	0.111294	0.111294	NE				GL27743-R1	0.0892036	0.0892036	NE
GL29962-R1	0.111294	0.111294	NE				GL29962-R1	0.0892036	0.0892036	NE
GL21112-R1	0.111294	0.111294	NE				GL21112-R1	0.0892036	0.0892036	NE
GL27113-R1	0.111294	0.111294	NE				GL27113-R1	0.0892036	0.0892036	NE
GL30214-R1	0.111294	0.111294	NE				GL30214-R1	0.0892036	0.0892036	NE
GL29005-R1	0.111294	0.111294	NE				GL29005-R1	0.0892036	0.0892036	NE
GL30294-R1	0.111294	0.111168	NE				GL30294-R1	0.0892036	0.0883085	NE
GL21223-R1	0.111294	0.109679	NE				GL21223-R1	0.0892036	0.0775722	NE
GL18988-R1	0.111294	0.111294	NE				GL18988-R1	0.0892036	0.0892036	NE
GL31661-R1	0.111294	0.111294	NE				GL31661-R1	0.0892036	0.0892036	NE
GL18437-R1	0.111294	0.111294	NE				GL18437-R1	0.0892036	0	E
GL24619-R1	0.111294	0.111294	NE				GL24619-R1	0.0892036	0.0892036	NE
GL17001-R1	0.111294	0.111294	NE				GL17001-R1	0.0892036	0.0892036	NE
GL22336-R1	0.111294	0.111294	NE				GL22336-R1	0.0892036	0.0892036	NE
GL24037-R1	0.111294	0.111294	NE				GL24037-R1	0.0892036	0.0892036	NE
GL29728-R1	0.111294	0.111294	NE				GL29728-R1	0.0892036	0.0892036	NE
GL18694-R1	0.111294	0.111294	NE				GL18694-R1	0.0892036	0.0892036	NE
GL21997-R1	0.111294	0.111294	NE				GL21997-R1	0.0892036	0.0892036	NE
GL25739-R1	0.111294	0	E				GL25739-R1	0.0892036	0	E
GL20228-R1	0.111294	0.111294	NE				GL20228-R1	0.0892036	0.0892036	NE
GL31324-R1	0.111294	0.111294	NE				GL31324-R1	0.0892036	0.0892036	NE
GL29967-R1	0.111294	0.111294	NE				GL29967-R1	0.0892036	0.0892036	NE
GL24037-R2	0.111294	0.111294	NE				GL24037-R2	0.0892036	0.0892036	NE
GL19432-R1	0.111294	0	E				GL19432-R1	0.0892036	0	E
GL21002-R1	0.111294	0.111294	NE				GL21002-R1	0.0892036	0	E
GL20873-R1	0.111294	0.111294	NE				GL20873-R1	0.0892036	0.0892036	NE
GL25424-R1	0.111294	0	E				GL25424-R1	0.0892036	0	E
GL20928-R1	0.111294	0.111294	NE				GL20928-R1	0.0892036	0	E
GL17878-R1	0.111294	0.111294	NE				GL17878-R1	0.0892036	0.0892036	NE
GL22193-R1	0.111294	0.111294	NE				GL22193-R1	0.0892036	0.0892036	NE
GL20742-R1	0.111294	0.111294	NE				GL20742-R1	0.0892036	0.0892036	NE
GL21817-R1	0.111294	0.111294	NE				GL21817-R1	0.0892036	0.0892036	NE
GL29012-R1	0.111294	0.111294	NE				GL29012-R1	0.0892036	0.0892036	NE
GL21219-R1	0.111294	0.111294	NE				GL21219-R1	0.0892036	0.0892036	NE
GL21399-R1	0.111294	0.111294	NE				GL21399-R1	0.0892036	0.0892036	NE
GL22642-R1	0.111294	0.111294	NE				GL22642-R1	0.0892036	0.0892036	NE
GL17052-R1	0.111294	0.111294	NE				GL17052-R1	0.0892036	0.0892036	NE
GL22859-R1	0.111294	0.111294	NE				GL22859-R1	0.0892036	0.0892036	NE
GL30020-R1	0.111294	0.111294	NE				GL30020-R1	0.0892036	0.0892036	NE
GL30117-R1	0.111294	0.111294	NE				GL30117-R1	0.0892036	0.0892036	NE
GL30925-R1	0.111294	0.111294	NE				GL30925-R1	0.0892036	0.0892036	NE
GL30116-R1	0.111294	0.111294	NE				GL30116-R1	0.0892036	0.0892036	NE
GL21024-R1	0.111294	0.111294	NE				GL21024-R1	0.0892036	0.0892036	NE
GL25150-R1	0.111294	0.111294	NE				GL25150-R1	0.0892036	0.0892036	NE
GL25150-R2	0.111294	0.111294	NE				GL25150-R2	0.0892036	0.0892036	NE
GL30909-R1	0.111294	0.111294	NE				GL30909-R1	0.0892036	0.0892036	NE
GL23450-R1	0.111294	0.111294	NE				GL23450-R1	0.0892036	0.0892036	NE
GL19397-R1	0.111294	0.111294	NE				GL19397-R1	0.0892036	0.0892036	NE
GL22434-R1	0.111294	0.111294	NE				GL22434-R1	0.0892036	0.0892036	NE
GL21375-R1	0.111294	0.111294	NE				GL21375-R1	0.0892036	0.0892036	NE
GL21929-R1	0.111294	0.111294	NE				GL21929-R1	0.0892036	0.0892036	NE
GL24505-R1	0.111294	0.111294	NE				GL24505-R1	0.0892036	0.0892036	NE
GL26631-R1	0.111294	0.111294	NE				GL26631-R1	0.0892036	0.0892036	NE
GL21852-R1	0.111294	0.111294	NE				GL21852-R1	0.0892036	0.0892036	NE
GL21617-R1	0.111294	0.111294	NE				GL21617-R1	0.0892036	0.0892036	NE
GL20698-R1	0.111294	0.111294	NE				GL20698-R1	0.0892036	0.0892036	NE
GL20698-R2	0.111294	0.111294	NE				GL20698-R2	0.0892036	0.0892036	NE
GL20848-R1	0.111294	0.111294	NE				GL20848-R1	0.0892036	0.0892036	NE
GL21844-R1	0.111294	0.111294	NE				GL21844-R1	0.0892036	0.0892036	NE
GL21844-R2	0.111294	0.111294	NE				GL21844-R2	0.0892036	0.0892036	NE
GL30115-R1	0.111294	0.111294	NE				GL30115-R1	0.0892036	0.0892036	NE
GL24971-R1	0.111294	0	E				GL24971-R1	0.0892036	0	E
GL21342-R1	0.111294	0.111294	NE				GL21342-R1	0.0892036	0.0892036	NE
GL26018-R1	0.111294	0.111294	NE				GL26018-R1	0.0892036	0.0892036	NE
GL22527-R1	0.111294	0.111294	NE				GL22527-R1	0.0892036	0.0892036	NE
GL31461-R1	0.111294	0.111294	NE				GL31461-R1	0.0892036	0.0892036	NE
GL18711-R1	0.111294	0.111294	NE				GL18711-R1	0.0892036	0.0892036	NE
GL20535-R1	0.111294	0.111294	NE				GL20535-R1	0.0892036	0.0892036	NE
GL24465-R1	0.111294	0.111294	NE				GL24465-R1	0.0892036	0.0892036	NE
GL27531-R1	0.111294	0.111294	NE				GL27531-R1	0.0892036	0.0892036	NE
GL24914-R1	0.111294	0.111294	NE				GL24914-R1	0.0892036	0.0892036	NE
GL15361-R1	0.111294	0.111294	NE				GL15361-R1	0.0892036	0.0892036	NE
GL26000-R1	0.111294	0.111294	NE				GL26000-R1	0.0892036	0.0892036	NE
GL20553-R1	0.111294	0.111294	NE				GL20553-R1	0.0892036	0.0892036	NE
GL24039-R1	0.111294	0.111294	NE				GL24039-R1	0.0892036	0.0892036	NE
GL30154-R1	0.111294	0.111294	NE				GL30154-R1	0.0892036	0.0892036	NE
GL19708-R1	0.111294	0.111294	NE				GL19708-R1	0.0892036	0.0892036	NE
GL20743-R1	0.111294	0.111294	NE				GL20743-R1	0.0892036	0.0892036	NE
GL27550-R1	0.111294	0.111294	NE				GL27550-R1	0.0892036	0.0892036	NE
GL29912-R1	0.111294	0.111294	NE				GL29912-R1	0.0892036	0.0892036	NE
GL29918-R1	0.111294	0.111294	NE				GL29918-R1	0.0892036	0.0892036	NE
GL29918-R2	0.111294	0.111294	NE				GL29918-R2	0.0892036	0.0892036	NE
GL24911-R1	0.111294	0.111294	NE				GL24911-R1	0.0892036	0.0892036	NE
GL27561-R1	0.111294	0.111294	NE				GL27561-R1	0.0892036	0.0892036	NE
GL24361-R1	0.111294	0.111294	NE				GL24361-R1	0.0892036	0.0892036	NE
GL26035-R1	0.111294	0.111294	NE				GL26035-R1	0.0892036	0.0892036	NE
GL23580-R1	0.111294	0.111294	NE				GL23580-R1	0.0892036	0.0892036	NE
GL23600-R1	0.111294	0.111294	NE				GL23600-R1	0.0892036	0.0892036	NE
GL19093-R1	0.111294	0.111294	NE				GL19093-R1	0.0892036	0.0892036	NE
GL22586-R1	0.111294	0.111294	NE				GL22586-R1	0.0892036	0.0892036	NE
GL22886-R1	0.111294	0.111294	NE				GL22886-R1	0.0892036	0.0892036	NE
GL21370-R1	0.111294	0.111294	NE				GL21370-R1	0.0892036	0.0892036	NE
GL24581-R1	0.111294	0.111294	NE				GL24581-R1	0.0892036	0.0892036	NE
GL24581-R2	0.111294	0.111294	NE				GL24581-R2	0.0892036	0.0892036	NE
GL21451-R1	0.111294	0.111294	NE				GL21451-R1	0.0892036	0.0892036	NE
GL23395-R1	0.111294	0.111294	NE				GL23395-R1	0.0892036	0.0892036	NE
GL30087-R1	0.111294	0.111294	NE				GL30087-R1	0.0892036	0.0892036	NE
GL25895-R1	0.111294	0.111294	NE				GL25895-R1	0.0892036	0.0892036	NE
GL18725-R1	0.111294	0.111294	NE				GL18725-R1	0.0892036	0.0892036	NE
GL24712-R1	0.111294	0.111294	NE				GL24712-R1	0.0892036	0.0892036	NE
GL29727-R1	0.111294	0.111294	NE				GL29727-R1	0.0892036	0.0892036	NE
GL30351-R1	0.111294	0.111294	NE				GL30351-R1	0.0892036	0.0892036	NE
GL26652-R1	0.111294	0.111294	NE				GL26652-R1	0.0892036	0	E
GL16576-R1	0.111294	0.111294	NE				GL16576-R1	0.0892036	0.0892036	NE
GL22204-R1	0.111294	0	E				GL22204-R1	0.0892036	0	E
GL18134-R1	0.111294	0.111294	NE				GL18134-R1	0.0892036	0.0892036	NE
GL27380-R1	0.111294	0.111294	NE				GL27380-R1	0.0892036	0.0892036	NE
GL28060-R1	0.111294	0.111294	NE				GL28060-R1	0.0892036	0.0892036	NE
GL30737-R1	0.111294	0.111294	NE				GL30737-R1	0.0892036	0.0892036	NE
GL30799-R1	0.111294	0.111294	NE				GL30799-R1	0.0892036	0.0892036	NE
GL31550-R1	0.111294	0.111294	NE				GL31550-R1	0.0892036	0.0892036	NE
GL27969-R1	0.111294	0.111294	NE				GL27969-R1	0.0892036	0.0892036	NE
GL25613-R1	0.111294	0.111294	NE				GL25613-R1	0.0892036	0.0892036	NE
GL15273-R1	0.111294	0.111294	NE				GL15273-R1	0.0892036	0.0892036	NE
GL26730-R1	0.111294	0.111294	NE				GL26730-R1	0.0892036	0.0892036	NE
GL18900-R1	0.111294	0	E				GL18900-R1	0.0892036	0	E
GL30088-R1	0.111294	0	E				GL30088-R1	0.0892036	0	E
GL15508-R1	0.111294	0.111294	NE				GL15508-R1	0.0892036	0.0892036	NE
GL15547-R1	0.111294	0.111294	NE				GL15547-R1	0.0892036	0.0892036	NE
GL15744-R1	0.111294	0.111294	NE				GL15744-R1	0.0892036	0.0892036	NE
GL17045-R1	0.111294	0.111294	NE				GL17045-R1	0.0892036	0.0892036	NE
GL17093-R1	0.111294	0.111294	NE				GL17093-R1	0.0892036	0.0892036	NE
GL17641-R1	0.111294	0.111294	NE				GL17641-R1	0.0892036	0.0892036	NE
GL18544-R1	0.111294	0.111294	NE				GL18544-R1	0.0892036	0.0892036	NE
GL20391-R1	0.111294	0.111294	NE				GL20391-R1	0.0892036	0.0892036	NE
GL21171-R1	0.111294	0.111294	NE				GL21171-R1	0.0892036	0.0892036	NE
GL22147-R1	0.111294	0.111294	NE				GL22147-R1	0.0892036	0.0892036	NE
GL24065-R1	0.111294	0.111294	NE				GL24065-R1	0.0892036	0.0892036	NE
GL24125-R1	0.111294	0.111294	NE				GL24125-R1	0.0892036	0.0892036	NE
GL24153-R1	0.111294	0.111294	NE				GL24153-R1	0.0892036	0.0892036	NE
GL24153-R2	0.111294	0.111294	NE				GL24153-R2	0.0892036	0.0892036	NE
GL24162-R1	0.111294	0.111294	NE				GL24162-R1	0.0892036	0.0892036	NE
GL24217-R1	0.111294	0.111294	NE				GL24217-R1	0.0892036	0.0892036	NE
GL24235-R1	0.111294	0.111294	NE				GL24235-R1	0.0892036	0.0892036	NE
GL24376-R1	0.111294	0.111294	NE				GL24376-R1	0.0892036	0.0892036	NE
GL25033-R1	0.111294	0.111294	NE				GL25033-R1	0.0892036	0.0892036	NE
GL25627-R1	0.111294	0.111294	NE				GL25627-R1	0.0892036	0.0892036	NE
GL25816-R1	0.111294	0.111294	NE				GL25816-R1	0.0892036	0.0892036	NE
GL25941-R1	0.111294	0.111294	NE				GL25941-R1	0.0892036	0.0892036	NE
GL28316-R1	0.111294	0.111294	NE				GL28316-R1	0.0892036	0.0892036	NE
GL29255-R1	0.111294	0.111294	NE				GL29255-R1	0.0892036	0.0892036	NE
GL31157-R1	0.111294	0.111294	NE				GL31157-R1	0.0892036	0.0892036	NE
GL22188-R1	0.111294	0.111294	NE				GL22188-R1	0.0892036	0.0892036	NE
GL26040-R1	0.111294	0.111294	NE				GL26040-R1	0.0892036	0.0892036	NE
GL15526-R1	0.111294	0.111294	NE				GL15526-R1	0.0892036	0.0892036	NE
GL18102-R1	0.111294	0.111294	NE				GL18102-R1	0.0892036	0.0892036	NE
GL24346-R1	0.111294	0.111294	NE				GL24346-R1	0.0892036	0.0892036	NE
GL24347-R1	0.111294	0.111294	NE				GL24347-R1	0.0892036	0.0892036	NE
GL24347-R2	0.111294	0.111294	NE				GL24347-R2	0.0892036	0.0892036	NE
GL24372-R1	0.111294	0.111294	NE				GL24372-R1	0.0892036	0.0892036	NE
GL29544-R1	0.111294	0.111294	NE				GL29544-R1	0.0892036	0.0892036	NE
GL24032-R1	0.111294	0.111294	NE				GL24032-R1	0.0892036	0.0892036	NE
GL24176-R1	0.111294	0.111294	NE				GL24176-R1	0.0892036	0.0892036	NE
GL29877-R1	0.111294	0.111294	NE				GL29877-R1	0.0892036	0.0892036	NE
GL29877-R2	0.111294	0.111294	NE				GL29877-R2	0.0892036	0.0892036	NE
GL25288-R1	0.111294	0.111294	NE				GL25288-R1	0.0892036	0.0892036	NE
GL30958-R1	0.111294	0	E				GL30958-R1	0.0892036	0	E
GL22560-R1	0.111294	0.111294	NE				GL22560-R1	0.0892036	0.0892036	NE
GL22224-R1	0.111294	0.111294	NE				GL22224-R1	0.0892036	0.0892036	NE
GL18839-R1	0.111294	0.111294	NE				GL18839-R1	0.0892036	0.0892036	NE
GL22235-R1	0.111294	0.111294	NE				GL22235-R1	0.0892036	0.0892036	NE
GL22251-R1	0.111294	0.111294	NE				GL22251-R1	0.0892036	0.0892036	NE
GL17003-R1	0.111294	0.111294	NE				GL17003-R1	0.0892036	0.0892036	NE
GL22666-R1	0.111294	0.111294	NE				GL22666-R1	0.0892036	0.0892036	NE
GL18633-R1	0.111294	0.111294	NE				GL18633-R1	0.0892036	0.0892036	NE
GL30499-R1	0.111294	0.111294	NE				GL30499-R1	0.0892036	0.0892036	NE
GL21586-R1	0.111294	0.111294	NE				GL21586-R1	0.0892036	0.0892036	NE
GL15784-R1	0.111294	0.111294	NE				GL15784-R1	0.0892036	0.0892036	NE
GL25048-R1	0.111294	0.111294	NE				GL25048-R1	0.0892036	0.0892036	NE
GL29921-R1	0.111294	0.111294	NE				GL29921-R1	0.0892036	0.0892036	NE
GL26574-R1	0.111294	0.111294	NE				GL26574-R1	0.0892036	0.0892036	NE
GL19766-R1	0.111294	0.111294	NE				GL19766-R1	0.0892036	0.0892036	NE
GL22590-R1	0.111294	0.111294	NE				GL22590-R1	0.0892036	0.0892036	NE
GL23465-R1	0.111294	0.111294	NE				GL23465-R1	0.0892036	0.0892036	NE
GL17906-R1	0.111294	0.111294	NE				GL17906-R1	0.0892036	0.0892036	NE
GL19012-R1	0.111294	0.111294	NE				GL19012-R1	0.0892036	0.0892036	NE
GL23873-R1	0.111294	0.11086	NE				GL23873-R1	0.0892036	0.0861121	NE
GL23384-R1	0.111294	0.111294	NE				GL23384-R1	0.0892036	0.0892036	NE
GL21959-R1	0.111294	0	E				GL21959-R1	0.0892036	0	E
GL22189-R1	0.111294	0.111294	NE				GL22189-R1	0.0892036	0.0892036	NE
GL29881-R1	0.111294	0.111294	NE				GL29881-R1	0.0892036	0.0892036	NE
GL26833-R1	0.111294	0.111294	NE				GL26833-R1	0.0892036	0.0892036	NE
GL23379-R1	0.111294	0.111294	NE				GL23379-R1	0.0892036	0.0892036	NE
GL21526-R1	0.111294	0.111294	NE				GL21526-R1	0.0892036	0.0892036	NE
GL26132-R1	0.111294	0.111294	NE				GL26132-R1	0.0892036	0.0892036	NE
GL29056-R1	0.111294	0.111294	NE				GL29056-R1	0.0892036	0.0892036	NE
GL23705-R1	0.111294	0.111294	NE				GL23705-R1	0.0892036	0.0892036	NE
GL26002-R1	0.111294	0.111294	NE				GL26002-R1	0.0892036	0.0892036	NE
GL23590-R1	0.111294	0.111294	NE				GL23590-R1	0.0892036	0.0892036	NE
GL30707-R1	0.111294	0.111294	NE				GL30707-R1	0.0892036	0.0892036	NE
GL24433-R1	0.111294	0.111294	NE				GL24433-R1	0.0892036	0.0892036	NE
GL24433-R2	0.111294	0.111294	NE				GL24433-R2	0.0892036	0.0892036	NE
GL22166-R1	0.111294	0.111294	NE				GL22166-R1	0.0892036	0.0892036	NE
GL22166-R2	0.111294	0.111294	NE				GL22166-R2	0.0892036	0.0892036	NE
GL23324-R1	0.111294	0.111294	NE				GL23324-R1	0.0892036	0.0892036	NE
GL21887-R1	0.111294	0.111294	NE				GL21887-R1	0.0892036	0.0892036	NE
GL23356-R1	0.111294	0.111294	NE				GL23356-R1	0.0892036	0.0892036	NE
GL25661-R1	0.111294	0	E				GL25661-R1	0.0892036	0	E
GL24759-R1	0.111294	0	E				GL24759-R1	0.0892036	0	E
GL24922-R1	0.111294	0.111294	NE				GL24922-R1	0.0892036	0.0892036	NE
GL16711-R1	0.111294	0.111294	NE				GL16711-R1	0.0892036	0.0892036	NE
GL24584-R1	0.111294	0.111294	NE				GL24584-R1	0.0892036	0.0892036	NE
GL24584-R2	0.111294	0.111294	NE				GL24584-R2	0.0892036	0.0892036	NE
GL21047-R1	0.111294	0.111294	NE				GL21047-R1	0.0892036	0.0892036	NE
GL27016-R1	0.111294	0.109016	NE				GL27016-R1	0.0892036	0.0727015	NE
GL31671-R1	0.111294	0.111294	NE				GL31671-R1	0.0892036	0.0892036	NE
GL22603-R1	0.111294	0.111294	NE				GL22603-R1	0.0892036	0.0892036	NE
GL26078-R1	0.111294	0.111294	NE				GL26078-R1	0.0892036	0.0892036	NE
GL30690-R1	0.111294	0.111294	NE				GL30690-R1	0.0892036	0.0892036	NE
GL22816-R1	0.111294	0.111294	NE				GL22816-R1	0.0892036	0.0892036	NE
GL24708-R1	0.111294	0.111294	NE				GL24708-R1	0.0892036	0.0892036	NE
GL19812-R1	0.111294	0.111294	NE				GL19812-R1	0.0892036	0.0892036	NE
GL24637-R1	0.111294	0.111294	NE				GL24637-R1	0.0892036	0.0892036	NE
GL25162-R1	0.111294	0.111294	NE				GL25162-R1	0.0892036	0.0892036	NE
GL28776-R1	0.111294	0.111294	NE				GL28776-R1	0.0892036	0.0892036	NE
GL30390-R1	0.111294	0	E				GL30390-R1	0.0892036	0	E
GL29878-R1	0.111294	0.111294	NE				GL29878-R1	0.0892036	0.0892036	NE
GL20523-R1	0.111294	0.111294	NE				GL20523-R1	0.0892036	0.0892036	NE
GL20523-R2	0.111294	0.111294	NE				GL20523-R2	0.0892036	0.0892036	NE
GL31180-R1	0.111294	0.111294	NE				GL31180-R1	0.0892036	0.0892036	NE
GL20891-R1	0.111294	0.111294	NE				GL20891-R1	0.0892036	0.0892036	NE
GL31401-R1	0.111294	0.111294	NE				GL31401-R1	0.0892036	0.0892036	NE
GL20551-R1	0.111294	0.111294	NE				GL20551-R1	0.0892036	0.0892036	NE
GL27720-R1	0.111294	0.111288	NE				GL27720-R1	0.0892036	0.089165	NE
GL22711-R1	0.111294	0	E				GL22711-R1	0.0892036	0	E
GL19823-R1	0.111294	0.111294	NE				GL19823-R1	0.0892036	0.0892036	NE
GL17170-R1	0.111294	0.111294	NE				GL17170-R1	0.0892036	0.0892036	NE
GL28567-R1	0.111294	0.111294	NE				GL28567-R1	0.0892036	0.0892036	NE
GL17430-R1	0.111294	0	E				GL17430-R1	0.0892036	0	E
GL19776-R1	0.111294	0.111294	NE				GL19776-R1	0.0892036	0.0892036	NE
GL28502-R1	0.111294	0.111294	NE				GL28502-R1	0.0892036	0.0892036	NE
GL24851-R1	0.111294	0.111294	NE				GL24851-R1	0.0892036	0.0892036	NE
GL30239-R1	0.111294	0.111294	NE				GL30239-R1	0.0892036	0.0892036	NE
GL20990-R1	0.111294	0.111294	NE				GL20990-R1	0.0892036	0.0892036	NE
GL17190-R1	0.111294	0.111294	NE				GL17190-R1	0.0892036	0.0892036	NE
GL24415-R1	0.111294	0.111294	NE				GL24415-R1	0.0892036	0.0892036	NE
GL17288-R1	0.111294	0.111294	NE				GL17288-R1	0.0892036	0.0892036	NE
GL31664-R1	0.111294	0.111294	NE				GL31664-R1	0.0892036	0.0892036	NE
GL31665-R1	0.111294	0.111294	NE				GL31665-R1	0.0892036	0.0892036	NE
GL24849-R1	0.111294	0	E				GL24849-R1	0.0892036	0	E
GL22628-R1	0.111294	0	E				GL22628-R1	0.0892036	0	E
GL24603-R1	0.111294	0.111294	NE				GL24603-R1	0.0892036	0.0892036	NE
GL31204-R1	0.111294	0.111294	NE				GL31204-R1	0.0892036	0.0892036	NE
GL24804-R1	0.111294	0	E				GL24804-R1	0.0892036	0	E
GL29631-R1	0.111294	0	E				GL29631-R1	0.0892036	0	E
GL28557-R1	0.111294	0	E				GL28557-R1	0.0892036	0	E
GL21533-R1	0.111294	0.111294	NE				GL21533-R1	0.0892036	0.0892036	NE
GL25578-R1	0.111294	0.111294	NE				GL25578-R1	0.0892036	0.0892036	NE
GL23796-R1	0.111294	0.111294	NE				GL23796-R1	0.0892036	0.0892036	NE
GL23438-R1	0.111294	0.111294	NE				GL23438-R1	0.0892036	0.0892036	NE
GL20271-R1	0.111294	0.111294	NE				GL20271-R1	0.0892036	0.0892036	NE
GL24625-R1	0.111294	0.111294	NE				GL24625-R1	0.0892036	0.0892036	NE
GL29711-R1	0.111294	0.108983	NE				GL29711-R1	0.0892036	0.072455	NE
GL22246-R1	0.111294	0.111294	NE				GL22246-R1	0.0892036	0.0892036	NE
GL27396-R1	0.111294	0.111294	NE				GL27396-R1	0.0892036	0.0892036	NE
GL22112-R1	0.111294	0.111294	NE				GL22112-R1	0.0892036	0.0892036	NE
GL24057-R1	0.111294	0.111294	NE				GL24057-R1	0.0892036	0.0892036	NE
GL30084-R1	0.111294	0.111294	NE				GL30084-R1	0.0892036	0.0892036	NE
GL30084-R2	0.111294	0.111294	NE				GL30084-R2	0.0892036	0.0892036	NE
GL30084-R3	0.111294	0.111294	NE				GL30084-R3	0.0892036	0.0892036	NE
GL29724-R1	0.111294	0.111294	NE				GL29724-R1	0.0892036	0.0892036	NE
GL22957-R1	0.111294	0.111294	NE				GL22957-R1	0.0892036	0.0892036	NE
GL30993-R1	0.111294	0.111294	NE				GL30993-R1	0.0892036	0.0892036	NE
GL28298-R1	0.111294	0.109493	NE				GL28298-R1	0.0892036	0.0762151	NE
GL20401-R1	0.111294	0.111294	NE				GL20401-R1	0.0892036	0.0892036	NE
GL21921-R1	0.111294	0.110092	NE				GL21921-R1	0.0892036	0.08058	NE
GL24824-R1	0.111294	0.108983	NE				GL24824-R1	0.0892036	0.072455	NE
GL15607-R1	0.111294	0.111294	NE				GL15607-R1	0.0892036	0.0892036	NE
GL29655-R1	0.111294	0.111294	NE				GL29655-R1	0.0892036	0.0892036	NE
GL30477-R1	0.111294	0.11086	NE				GL30477-R1	0.0892036	0.0861121	NE
GL24792-R1	0.111294	0	E				GL24792-R1	0.0892036	0	E
GL15154-R1	0.111294	0.111294	NE				GL15154-R1	0.0892036	0.0892036	NE
GL20896-R1	0.111294	0.111294	NE				GL20896-R1	0.0892036	0.0892036	NE
GL26683-R1	0.111294	0.111294	NE				GL26683-R1	0.0892036	0.0892036	NE
GL26682-R1	0.111294	0.111294	NE				GL26682-R1	0.0892036	0.0892036	NE
GL17594-R1	0.111294	0.111294	NE				GL17594-R1	0.0892036	0.0892036	NE
GL22515-R1	0.111294	0.111294	NE				GL22515-R1	0.0892036	0.0892036	NE
GL16081-R1	0.111294	0.111294	NE				GL16081-R1	0.0892036	0.0892036	NE
GL25035-R1	0.111294	0.111294	NE				GL25035-R1	0.0892036	0.0892036	NE
GL25365-R1	0.111294	0.111294	NE				GL25365-R1	0.0892036	0.0892036	NE
GL20240-R1	0.111294	0.111294	NE				GL20240-R1	0.0892036	0.0892036	NE
GL31683-R1	0.111294	0.111294	NE				GL31683-R1	0.0892036	0.0892036	NE
GL26667-R1	0.111294	0.111294	NE				GL26667-R1	0.0892036	0.0892036	NE
GL16715-R1	0.111294	0.111294	NE				GL16715-R1	0.0892036	0.0892036	NE
GL17604-R1	0.111294	0.111294	NE				GL17604-R1	0.0892036	0.0892036	NE
GL27621-R1	0.111294	0.111294	NE				GL27621-R1	0.0892036	0.0892036	NE
GL31606-R1	0.111294	0.111294	NE				GL31606-R1	0.0892036	0.0892036	NE
GL23034-R1	0.111294	0.111294	NE				GL23034-R1	0.0892036	0.0892036	NE
GL23038-R1	0.111294	0.111294	NE				GL23038-R1	0.0892036	0.0892036	NE
GL22548-R1	0.111294	0.111294	NE				GL22548-R1	0.0892036	0.0892036	NE
GL24644-R1	0.111294	0.111294	NE				GL24644-R1	0.0892036	0.0892036	NE
GL24771-R1	0.111294	0.111294	NE				GL24771-R1	0.0892036	0.0892036	NE
GL31258-R1	0.111294	0.111294	NE				GL31258-R1	0.0892036	0.0892036	NE
GL20994-R1	0.111294	0.111294	NE				GL20994-R1	0.0892036	0.0892036	NE
GL24115-R1	0.111294	0.111294	NE				GL24115-R1	0.0892036	0.0892036	NE
GL30208-R1	0.111294	0	E				GL30208-R1	0.0892036	0	E
GL21781-R1	0.111294	0.111202	NE				GL21781-R1	0.0892036	0.088554	NE
GL22139-R1	0.111294	0.111213	NE				GL22139-R1	0.0892036	0.0886274	NE
GL17879-R1	0.111294	0.111213	NE				GL17879-R1	0.0892036	0.0886274	NE
GL25255-R1	0.111294	0.111294	NE				GL25255-R1	0.0892036	0.0892036	NE
GL25255-R2	0.111294	0.111294	NE				GL25255-R2	0.0892036	0.0892036	NE
GL31360-R1	0.111294	0	E				GL31360-R1	0.0892036	0	E
GL25971-R1	0.111294	0	E				GL25971-R1	0.0892036	0	E
GL29910-R1	0.111294	0.111294	NE				GL29910-R1	0.0892036	0.0892036	NE
GL18545-R1	0.111294	0.111252	NE				GL18545-R1	0.0892036	0.0889062	NE
GL26795-R1	0.111294	0	E				GL26795-R1	0.0892036	0	E
GL19372-R1	0.111294	0.111294	NE				GL19372-R1	0.0892036	0.0892036	NE
GL23768-R1	0.111294	0.111294	NE				GL23768-R1	0.0892036	0.0892036	NE
GL30044-R1	0.111294	0.111294	NE				GL30044-R1	0.0892036	0.0892036	NE
GL26572-R1	0.111294	0.111294	NE				GL26572-R1	0.0892036	0.0892036	NE
GL18415-R1	0.111294	0.111294	NE				GL18415-R1	0.0892036	0.0892036	NE
GL27033-R1	0.111294	0.111294	NE				GL27033-R1	0.0892036	0.0892036	NE
GL17247-R1	0.111294	0	E				GL17247-R1	0.0892036	0	E
GL25070-R1	0.111294	0	E				GL25070-R1	0.0892036	0	E
GL30409-R1	0.111294	0	E				GL30409-R1	0.0892036	0	E
GL19834-R1	0.111294	0	E				GL19834-R1	0.0892036	0	E
GL26706-R1	0.111294	0.111294	NE				GL26706-R1	0.0892036	0.0892036	NE
GL30546-R1	0.111294	0.111294	NE				GL30546-R1	0.0892036	0.0892036	NE
GL24616-R1	0.111294	0.111294	NE				GL24616-R1	0.0892036	0.0892036	NE
GL20416-R1	0.111294	0	E				GL20416-R1	0.0892036	0	E
GL26714-R1	0.111294	0	E				GL26714-R1	0.0892036	0	E
GL30148-R1	0.111294	0	E				GL30148-R1	0.0892036	0	E
GL26488-R1	0.111294	0.111294	NE				GL26488-R1	0.0892036	0.0892036	NE
GL26488-R2	0.111294	0.111294	NE				GL26488-R2	0.0892036	0.0892036	NE
GL24047-R1	0.111294	0.111265	NE				GL24047-R1	0.0892036	0.0890004	NE
GL24439-R1	0.111294	0.111294	NE				GL24439-R1	0.0892036	0.0892036	NE
GL22111-R1	0.111294	0	E				GL22111-R1	0.0892036	0	E
GL30911-R1	0.111294	0	E				GL30911-R1	0.0892036	0	E
GL16639-R1	0.111294	0.111294	NE				GL16639-R1	0.0892036	0.0892036	NE
GL25327-R1	0.111294	0.111294	NE				GL25327-R1	0.0892036	0.0892036	NE
GL18527-R1	0.111294	0	E				GL18527-R1	0.0892036	0	E
GL21258-R1	0.111294	0.111294	NE				GL21258-R1	0.0892036	0.0892036	NE
GL21848-R1	0.111294	0.111294	NE				GL21848-R1	0.0892036	0.0892036	NE
GL31395-R1	0.111294	0.111294	NE				GL31395-R1	0.0892036	0.0892036	NE
GL29819-R1	0.111294	0.111294	NE				GL29819-R1	0.0892036	0.0892036	NE
GL29632-R1	0.111294	0.111294	NE				GL29632-R1	0.0892036	0.0892036	NE
GL28545-R1	0.111294	0.111294	NE				GL28545-R1	0.0892036	0.0892036	NE
GL22585-R1	0.111294	0.111294	NE				GL22585-R1	0.0892036	0.0892036	NE
GL24986-R1	0.111294	0	E				GL24986-R1	0.0892036	0	E
GL21955-R1	0.111294	0.111294	NE				GL21955-R1	0.0892036	0.0892036	NE
GL30332-R1	0.111294	0.111294	NE				GL30332-R1	0.0892036	0.0892036	NE
GL30835-R1	0.111294	0.111294	NE				GL30835-R1	0.0892036	0.0892036	NE
GL26704-R1	0.111294	0.111294	NE				GL26704-R1	0.0892036	0.0892036	NE
GL15529-R1	0.111294	0.111294	NE				GL15529-R1	0.0892036	0.0892036	NE
GL22882-R1	0.111294	0.111294	NE				GL22882-R1	0.0892036	0.0892036	NE
GL25823-R1	0.111294	0.111294	NE				GL25823-R1	0.0892036	0.0892036	NE
GL29836-R2	0.111294	0.111294	NE				GL29836-R2	0.0892036	0.0892036	NE
GL29836-R1	0.111294	0.111294	NE				GL29836-R1	0.0892036	0.0892036	NE
GL28626-R1	0.111294	0.111294	NE				GL28626-R1	0.0892036	0.0892036	NE
GL24613-R1	0.111294	0.111294	NE				GL24613-R1	0.0892036	0.0892036	NE
GL25071-R1	0.111294	0.111294	NE				GL25071-R1	0.0892036	0.0892036	NE
GL30578-R1	0.111294	0.111294	NE				GL30578-R1	0.0892036	0.0892036	NE
GL17083-R1	0.111294	0.111294	NE				GL17083-R1	0.0892036	0.0892036	NE
GL17796-R1	0.111294	0.111294	NE				GL17796-R1	0.0892036	0.0892036	NE
GL19337-R1	0.111294	0.111294	NE				GL19337-R1	0.0892036	0.0892036	NE
GL17612-R1	0.111294	0.111294	NE				GL17612-R1	0.0892036	0.0892036	NE
GL31286-R1	0.111294	0	E				GL31286-R1	0.0892036	0	E
GL30373-R0	0.111294	0.111294	NE				GL30373-R0	0.0892036	0.0892036	NE
GL30373-R1	0.111294	0.111294	NE				GL30373-R1	0.0892036	0.0892036	NE
GL24642-R1	0.111294	0	E				GL24642-R1	0.0892036	0	E
GL17006-R1	0.111294	0	E				GL17006-R1	0.0892036	0	E
GL21425-R1	0.111294	0	E				GL21425-R1	0.0892036	0	E
GL21006-R1	0.111294	0.111294	NE				GL21006-R1	0.0892036	0.0892036	NE
GL30576-R1	0.111294	0	E				GL30576-R1	0.0892036	0	E
GL24572-R1	0.111294	0	E				GL24572-R1	0.0892036	0	E
GL31316-R1	0.111294	0	E				GL31316-R1	0.0892036	0	E
GL25922-R1	0.111294	0.111294	NE				GL25922-R1	0.0892036	0.0892036	NE
GL24913-R1	0.111294	0.111294	NE				GL24913-R1	0.0892036	0.0892036	NE
GL25440-R1	0.111294	0.111294	NE				GL25440-R1	0.0892036	0.0892036	NE
GL28133-R1	0.111294	0.111294	NE				GL28133-R1	0.0892036	0.0892036	NE
GL20661-R1	0.111294	0.111294	NE				GL20661-R1	0.0892036	0.0892036	NE
GL19075-R1	0.111294	0.111294	NE				GL19075-R1	0.0892036	0.0892036	NE
GL30111-R1	0.111294	0.111294	NE				GL30111-R1	0.0892036	0.0892036	NE
GL22645-R1	0.111294	0.111294	NE				GL22645-R1	0.0892036	0.0892036	NE
GL29633-R1	0.111294	0.111294	NE				GL29633-R1	0.0892036	0.0892036	NE
GL29700-R1	0.111294	0.111294	NE				GL29700-R1	0.0892036	0.0892036	NE
GL15699-R1	0.111294	0.111294	NE				GL15699-R1	0.0892036	0.0892036	NE
GL30541-R1	0.111294	0.111294	NE				GL30541-R1	0.0892036	0.0892036	NE
GL18499-R1	0.111294	0.111294	NE				GL18499-R1	0.0892036	0.0892036	NE
GL29483-R1	0.111294	0.111294	NE				GL29483-R1	0.0892036	0.0892036	NE
GL21231-R1	0.111294	0.111294	NE				GL21231-R1	0.0892036	0.0892036	NE
GL21534-R1	0.111294	0.111294	NE				GL21534-R1	0.0892036	0.0892036	NE
GL17042-R1	0.111294	0.111294	NE				GL17042-R1	0.0892036	0.0892036	NE
GL24710-R1	0.111294	0.111294	NE				GL24710-R1	0.0892036	0.0892036	NE
GL21166-R1	0.111294	0	E				GL21166-R1	0.0892036	0	E
GL19819-R1	0.111294	0	E				GL19819-R1	0.0892036	0	E
GL22262-R1	0.111294	0.111294	NE				GL22262-R1	0.0892036	0.0892036	NE
GL20270-R1	0.111294	0.111294	NE				GL20270-R1	0.0892036	0.0892036	NE
GL25884-R1	0.111294	0.111294	NE				GL25884-R1	0.0892036	0.0892036	NE
GL22580-R1	0.111294	0.111294	NE				GL22580-R1	0.0892036	0.0892036	NE
GL31615-R1	0.111294	0.111294	NE				GL31615-R1	0.0892036	0.0892036	NE
GL28558-R1	0.111294	0	E				GL28558-R1	0.0892036	0	E
GL21175-R1	0.111294	0	E				GL21175-R1	0.0892036	0	E
GL24493-R1	0.111294	0	E				GL24493-R1	0.0892036	0	E
GL19278-R1	0.111294	0	E				GL19278-R1	0.0892036	0	E
GL23742-R1	0.111294	0.111294	NE				GL23742-R1	0.0892036	0.0892036	NE
GL25047-R1	0.111294	0.111294	NE				GL25047-R1	0.0892036	0.0892036	NE
GL21361-R1	0.111294	0.111294	NE				GL21361-R1	0.0892036	0.0892036	NE
GL16921-R1	0.111294	0	E				GL16921-R1	0.0892036	0	E
GL20235-R1	0.111294	0.111294	NE				GL20235-R1	0.0892036	0.0892036	NE
GL25289-R1	0.111294	0.111294	NE				GL25289-R1	0.0892036	0.0892036	NE
GL30664-R1	0.111294	0	E				GL30664-R1	0.0892036	0	E
GL30403-R1	0.111294	0	E				GL30403-R1	0.0892036	0	E
GL20695-R1	0.111294	0.111294	NE				GL20695-R1	0.0892036	0.0892036	NE
GL24381-R1	0.111294	0	E				GL24381-R1	0.0892036	0	E
GL25330-R1	0.111294	0.111294	NE				GL25330-R1	0.0892036	0.0892036	NE
GL31652-R1	0.111294	0.111294	NE				GL31652-R1	0.0892036	0.0892036	NE
GL26011-R1	0.111294	0.111294	NE				GL26011-R1	0.0892036	0.0892036	NE
GL19459-R1	0.111294	0.111294	NE				GL19459-R1	0.0892036	0.0892036	NE
GL31662-R1	0.111294	0.111294	NE				GL31662-R1	0.0892036	0.0892036	NE
GL19205-R1	0.111294	0.111294	NE				GL19205-R1	0.0892036	0.0892036	NE
GL18875-R1	0.111294	0.111294	NE				GL18875-R1	0.0892036	0.0892036	NE
GL25146-R1	0.111294	0.111294	NE				GL25146-R1	0.0892036	0.0892036	NE
GL19810-R1	0.111294	0.111294	NE				GL19810-R1	0.0892036	0.0892036	NE
GL25117-R1	0.111294	0.111294	NE				GL25117-R1	0.0892036	0.0892036	NE
GL25817-R1	0.111294	0.111294	NE				GL25817-R1	0.0892036	0.0892036	NE
GL16739-R1	0.111294	0.111294	NE				GL16739-R1	0.0892036	0.0892036	NE
GL28124-R1	0.111294	0.111294	NE				GL28124-R1	0.0892036	0.0892036	NE
GL26599-R1	0.111294	0.111294	NE				GL26599-R1	0.0892036	0.0892036	NE
GL30079-R1	0.111294	0.111294	NE				GL30079-R1	0.0892036	0.0892036	NE
GL16746-R1	0.111294	0.111294	NE				GL16746-R1	0.0892036	0.0892036	NE
GL16156-R1	0.111294	0.111294	NE				GL16156-R1	0.0892036	0.0892036	NE
GL25873-R1	0.111294	0.111294	NE				GL25873-R1	0.0892036	0.0892036	NE
GL16582-R1	0.111294	0.111294	NE				GL16582-R1	0.0892036	0.0892036	NE
GL25575-R1	0.111294	0.111294	NE				GL25575-R1	0.0892036	0.0892036	NE
GL16738-R1	0.111294	0.111294	NE				GL16738-R1	0.0892036	0.0892036	NE
GL24307-R1	0.111294	0.111294	NE				GL24307-R1	0.0892036	0.0892036	NE
GL27245-R1	0.111294	0.111294	NE				GL27245-R1	0.0892036	0.0892036	NE
GL25112-R1	0.111294	0.111294	NE				GL25112-R1	0.0892036	0.0892036	NE
GL18625-R1	0.111294	0.111294	NE				GL18625-R1	0.0892036	0.0892036	NE
GL23543-R1	0.111294	0.111294	NE				GL23543-R1	0.0892036	0.0892036	NE
GL23507-R1	0.111294	0.111294	NE				GL23507-R1	0.0892036	0.0892036	NE
GL22863-R1	0.111294	0.111294	NE				GL22863-R1	0.0892036	0.0892036	NE
GL25996-R1	0.111294	0.111294	NE				GL25996-R1	0.0892036	0.0892036	NE
GL30295-R1	0.111294	0.111294	NE				GL30295-R1	0.0892036	0.0892036	NE
GL25353-R1	0.111294	0.111294	NE				GL25353-R1	0.0892036	0.0892036	NE
GL29833-R1	0.111294	0.111294	NE				GL29833-R1	0.0892036	0.0892036	NE
GL20925-R1	0.111294	0.111294	NE				GL20925-R1	0.0892036	0.0892036	NE
GL15303-R1	0.111294	0.111294	NE				GL15303-R1	0.0892036	0.0892036	NE
GL30453-R1	0.111294	0.111294	NE				GL30453-R1	0.0892036	0.0892036	NE
GL21922-R1	0.111294	0.111294	NE				GL21922-R1	0.0892036	0.0892036	NE
GL16501-R1	0.111294	0.111294	NE				GL16501-R1	0.0892036	0.0892036	NE
GL23148-R1	0.111294	0.111294	NE				GL23148-R1	0.0892036	0.0892036	NE
GL21066-R1	0.111294	0.111294	NE				GL21066-R1	0.0892036	0.0892036	NE
GL26604-R1	0.111294	0.111294	NE				GL26604-R1	0.0892036	0.0892036	NE
GL23962-R1	0.111294	0.10359	NE				GL23962-R1	0.0892036	0.0298407	NE
GL23456-R1	0.111294	0.111294	NE				GL23456-R1	0.0892036	0.0892036	NE
GL25066-R1	0.111294	0.111294	NE				GL25066-R1	0.0892036	0.0892036	NE
GL19526-R1	0.111294	0.111294	NE				GL19526-R1	0.0892036	0.0892036	NE
GL20687-R1	0.111294	0.111294	NE				GL20687-R1	0.0892036	0.0892036	NE
GL24199-R1	0.111294	0.111294	NE				GL24199-R1	0.0892036	0.0892036	NE
GL17184-R1	0.111294	0.111294	NE				GL17184-R1	0.0892036	0.0892036	NE
GL19267-R1	0.111294	0.111294	NE				GL19267-R1	0.0892036	0.0892036	NE
GL25695-R1	0.111294	0.111294	NE				GL25695-R1	0.0892036	0.0892036	NE
GL27193-R1	0.111294	0.111294	NE				GL27193-R1	0.0892036	0.0892036	NE
GL15802-R1	0.111294	0.111294	NE				GL15802-R1	0.0892036	0.0892036	NE
GL23447-R1	0.111294	0.111294	NE				GL23447-R1	0.0892036	0.0892036	NE
GL30602-R1	0.111294	0.111294	NE				GL30602-R1	0.0892036	0.0892036	NE
GL18562-R1	0.111294	0.111294	NE				GL18562-R1	0.0892036	0.0892036	NE
GL23886-R1	0.111294	0.111294	NE				GL23886-R1	0.0892036	0.0892036	NE
GL21014-R1	0.111294	0.111294	NE				GL21014-R1	0.0892036	0.0892036	NE
GL30051-R1	0.111294	0.111294	NE				GL30051-R1	0.0892036	0.0892036	NE
GL29889-R2	0.111294	0.111294	NE				GL29889-R2	0.0892036	0.0892036	NE
GL16847-R1	0.111294	0.111294	NE				GL16847-R1	0.0892036	0.0892036	NE
GL22430-R1	0.111294	0.111294	NE				GL22430-R1	0.0892036	0.0892036	NE
GL22430-R2	0.111294	0.111294	NE				GL22430-R2	0.0892036	0.0892036	NE
GL30555-R1	0.111294	0.111294	NE				GL30555-R1	0.0892036	0.0892036	NE
GL17543-R1	0.111294	0.111294	NE				GL17543-R1	0.0892036	0.0892036	NE
GL31498-R1	0.111294	0.111294	NE				GL31498-R1	0.0892036	0.0892036	NE
GL16611-R1	0.111294	0.111294	NE				GL16611-R1	0.0892036	0.0892036	NE
GL15140-R1	0.111294	0.111294	NE				GL15140-R1	0.0892036	0.0892036	NE
GL21120-R1	0.111294	0.111294	NE				GL21120-R1	0.0892036	0.0892036	NE
GL26570-R1	0.111294	0.111294	NE				GL26570-R1	0.0892036	0.0892036	NE
GL29945-R1	0.111294	0.111294	NE				GL29945-R1	0.0892036	0.0892036	NE
GL18577-R1	0.111294	0.111294	NE				GL18577-R1	0.0892036	0.0892036	NE
GL31192-R1	0.111294	0.111294	NE				GL31192-R1	0.0892036	0.0892036	NE
GL23611-R1	0.111294	0.111294	NE				GL23611-R1	0.0892036	0.0892036	NE
GL30670-R1	0.111294	0.111294	NE				GL30670-R1	0.0892036	0.0892036	NE
GL29712-R1	0.111294	0.111294	NE				GL29712-R1	0.0892036	0.0892036	NE
GL31637-R1	0.111294	0.111294	NE				GL31637-R1	0.0892036	0.0892036	NE
GL28745-R1	0.111294	0.111294	NE				GL28745-R1	0.0892036	0.0892036	NE
GL25988-R1	0.111294	0.111294	NE				GL25988-R1	0.0892036	0.0892036	NE
GL31505-R1	0.111294	0.111294	NE				GL31505-R1	0.0892036	0.0892036	NE
GL29011-R1	0.111294	0.111294	NE				GL29011-R1	0.0892036	0.0892036	NE
GL24640-R1	0.111294	0.111294	NE				GL24640-R1	0.0892036	0.0892036	NE
GL29524-R1	0.111294	0.111294	NE				GL29524-R1	0.0892036	0.0892036	NE
GL26015-R1	0.111294	0.111294	NE				GL26015-R1	0.0892036	0.0892036	NE
GL17918-R1	0.111294	0.111294	NE				GL17918-R1	0.0892036	0.0892036	NE
GL27344-R1	0.111294	0.111294	NE				GL27344-R1	0.0892036	0.0892036	NE
GL31242-R1	0.111294	0.111294	NE				GL31242-R1	0.0892036	0.0892036	NE
GL26658-R1	0.111294	0.111294	NE				GL26658-R1	0.0892036	0.0892036	NE
GL26113-R1	0.111294	0.111294	NE				GL26113-R1	0.0892036	0.0892036	NE
GL26573-R1	0.111294	0.111294	NE				GL26573-R1	0.0892036	0.0892036	NE
GL22841-R1	0.111294	0.111294	NE				GL22841-R1	0.0892036	0.0892036	NE
GL30348-R1	0.111294	0	E				GL30348-R1	0.0892036	0	E
GL30508-R1	0.111294	0.111294	NE				GL30508-R1	0.0892036	0.0892036	NE
GL25555-R1	0.111294	0.111294	NE				GL25555-R1	0.0892036	0.0892036	NE
GL22885-R1	0.111294	0.111294	NE				GL22885-R1	0.0892036	0.0892036	NE
GL23954-R1	0.111294	0.111294	NE				GL23954-R1	0.0892036	0.0892036	NE
GL29904-R1	0.111294	0.111294	NE				GL29904-R1	0.0892036	0.0892036	NE
GL17240-R1	0.111294	0.111294	NE				GL17240-R1	0.0892036	0.0892036	NE
GL18879-R1	0.111294	0.111294	NE				GL18879-R1	0.0892036	0.0892036	NE
GL30203-R1	0.111294	0.111294	NE				GL30203-R1	0.0892036	0.0892036	NE
GL21707-R1	0.111294	0.111294	NE				GL21707-R1	0.0892036	0.0892036	NE
GL22792-R1	0.111294	0.111294	NE				GL22792-R1	0.0892036	0.0892036	NE
GL22792-R2	0.111294	0.111294	NE				GL22792-R2	0.0892036	0.0892036	NE
GL17179-R1	0.111294	0.111294	NE				GL17179-R1	0.0892036	0.0892036	NE
GL23743-R1	0.111294	0.111294	NE				GL23743-R1	0.0892036	0.0892036	NE
GL23743-R2	0.111294	0.111294	NE				GL23743-R2	0.0892036	0.0892036	NE
GL25218-R1	0.111294	0.111294	NE				GL25218-R1	0.0892036	0.0892036	NE
GL23948-R1	0.111294	0.111294	NE				GL23948-R1	0.0892036	0.0892036	NE
GL18722-R1	0.111294	0.111294	NE				GL18722-R1	0.0892036	0.0892036	NE
GL24652-R1	0.111294	0.111294	NE				GL24652-R1	0.0892036	0.0892036	NE
GL15031-R1	0.111294	0.111294	NE				GL15031-R1	0.0892036	0.0892036	NE
GL25272-R1	0.111294	0.111294	NE				GL25272-R1	0.0892036	0.0892036	NE
GL24639-R1	0.111294	0.111294	NE				GL24639-R1	0.0892036	0.0892036	NE
GL27822-R1	0.111294	0.111294	NE				GL27822-R1	0.0892036	0.0892036	NE
GL22966-R1	0.111294	0.111294	NE				GL22966-R1	0.0892036	0.0892036	NE
GL26651-R1	0.111294	0.111294	NE				GL26651-R1	0.0892036	0.0892036	NE
GL30055-R1	0.111294	0.111294	NE				GL30055-R1	0.0892036	0.0892036	NE
GL24128-R1	0.111294	0.111294	NE				GL24128-R1	0.0892036	0.0892036	NE
GL24317-R1	0.111294	0.111294	NE				GL24317-R1	0.0892036	0.0892036	NE
GL16114-R1	0.111294	0.111294	NE				GL16114-R1	0.0892036	0.0892036	NE
GL19790-R1	0.111294	0.111294	NE				GL19790-R1	0.0892036	0.0892036	NE
GL22533-R1	0.111294	0.111294	NE				GL22533-R1	0.0892036	0.0892036	NE
GL17761-R1	0.111294	0.111294	NE				GL17761-R1	0.0892036	0.0892036	NE
GL18144-R1	0.111294	0.111294	NE				GL18144-R1	0.0892036	0.0892036	NE
GL21354-R1	0.111294	0.111294	NE				GL21354-R1	0.0892036	0.0892036	NE
GL29181-R1	0.111294	0.111294	NE				GL29181-R1	0.0892036	0.0892036	NE
GL15754-R1	0.111294	0.111294	NE				GL15754-R1	0.0892036	0.0892036	NE
GL22281-R1	0.111294	0.111294	NE				GL22281-R1	0.0892036	0.0892036	NE
GL29837-R1	0.111294	0.111294	NE				GL29837-R1	0.0892036	0.0892036	NE
GL23170-R1	0.111294	0.111294	NE				GL23170-R1	0.0892036	0.0892036	NE
GL29865-R1	0.111294	0.111294	NE				GL29865-R1	0.0892036	0.0892036	NE
GL26068-R1	0.111294	0.111294	NE				GL26068-R1	0.0892036	0.0892036	NE
GL20411-R1	0.111294	0	E				GL20411-R1	0.0892036	0	E
GL18754-R1	0.111294	0	E				GL18754-R1	0.0892036	0	E
GL19627-R1	0.111294	0.111294	NE				GL19627-R1	0.0892036	0.0892036	NE
GL23629-R1	0.111294	0.111294	NE				GL23629-R1	0.0892036	0.0892036	NE
GL23860-R1	0.111294	0.111294	NE				GL23860-R1	0.0892036	0.0892036	NE
GL31190-R1	0.111294	0.111294	NE				GL31190-R1	0.0892036	0.0892036	NE
GL25317-R1	0.111294	0.111294	NE				GL25317-R1	0.0892036	0.0892036	NE
GL24144-R1	0.111294	0.111294	NE				GL24144-R1	0.0892036	0.0892036	NE
GL23129-R1	0.111294	0.111294	NE				GL23129-R1	0.0892036	0.0892036	NE
GL16697-R1	0.111294	0	E				GL16697-R1	0.0892036	0	E
GL29731-R1	0.111294	0	E				GL29731-R1	0.0892036	0	E
GL16005-R1	0.111294	0	E				GL16005-R1	0.0892036	0	E
GL18703-R1	0.111294	0.111294	NE				GL18703-R1	0.0892036	0.0892036	NE
GL15683-R1	0.111294	0.111294	NE				GL15683-R1	0.0892036	0.0892036	NE
GL18178-R1	0.111294	0.111294	NE				GL18178-R1	0.0892036	0.0892036	NE
GL15686-R1	0.111294	0	E				GL15686-R1	0.0892036	0	E
GL25036-R1	0.111294	0.111294	NE				GL25036-R1	0.0892036	0.0892036	NE
GL25287-R1	0.111294	0.111294	NE				GL25287-R1	0.0892036	0.0892036	NE
GL18424-R1	0.111294	0.111294	NE				GL18424-R1	0.0892036	0.0892036	NE
GL20729-R1	0.111294	0.111294	NE				GL20729-R1	0.0892036	0.0892036	NE
GL18724-R1	0.111294	0	E				GL18724-R1	0.0892036	0	E
GL23790-R1	0.111294	0	E				GL23790-R1	0.0892036	0	E
GL31337-R1	0.111294	0.111294	NE				GL31337-R1	0.0892036	0.0892036	NE
GL31604-R1	0.111294	0.111294	NE				GL31604-R1	0.0892036	0.0892036	NE
GL20473-R1	0.111294	0.111293	NE				GL20473-R1	0.0892036	0.089199	NE
GL24872-R1	0.111294	0.111294	NE				GL24872-R1	0.0892036	0.0892036	NE
GL23976-R1	0.111294	0.111294	NE				GL23976-R1	0.0892036	0.0892036	NE
GL17919-R1	0.111294	0	E				GL17919-R1	0.0892036	0	E
GL26666-R1	0.111294	0	E				GL26666-R1	0.0892036	0	E
GL23651-R1	0.111294	0.111294	NE				GL23651-R1	0.0892036	0.0892036	NE
GL30808-R1	0.111294	0.111292	NE				GL30808-R1	0.0892036	0.0891908	NE
GL24508-R1	0.111294	0.111294	NE				GL24508-R1	0.0892036	0.0892036	NE
GL24512-R1	0.111294	0.111294	NE				GL24512-R1	0.0892036	0.0892036	NE
GL22880-R1	0.111294	0.111294	NE				GL22880-R1	0.0892036	0.0892036	NE
GL30224-R1	0.111294	0.111294	NE				GL30224-R1	0.0892036	0.0892036	NE
GL19805-R1	0.111294	0.111294	NE				GL19805-R1	0.0892036	0.0892036	NE
GL23350-R1	0.111294	0.111294	NE				GL23350-R1	0.0892036	0.0892036	NE
GL30346-R1	0.111294	0.111294	NE				GL30346-R1	0.0892036	0.0892036	NE
GL24291-R1	0.111294	0.111294	NE				GL24291-R1	0.0892036	0.0892036	NE
GL25254-R1	0.111294	0.111294	NE				GL25254-R1	0.0892036	0.0892036	NE
GL30211-R1	0.111294	0.111294	NE				GL30211-R1	0.0892036	0.0892036	NE
GL23397-R1	0.111294	0.111294	NE				GL23397-R1	0.0892036	0.0892036	NE
GL15482-R1	0.111294	0.111294	NE				GL15482-R1	0.0892036	0.0892036	NE
GL31211-R1	0.111294	0	E				GL31211-R1	0.0892036	0	E
GL30432-R1	0.111294	0	E				GL30432-R1	0.0892036	0	E
GL16722-R1	0.111294	0.111294	NE				GL16722-R1	0.0892036	0.0892036	NE
GL24054-R1	0.111294	0	E				GL24054-R1	0.0892036	0	E
GL31659-R1	0.111294	0	E				GL31659-R1	0.0892036	0	E
GL26017-R1	0.111294	0.111294	NE				GL26017-R1	0.0892036	0.0892036	NE
GL29934-R1	0.111294	0.111294	NE				GL29934-R1	0.0892036	0.0892036	NE
GL31141-R1	0.111294	0.111294	NE				GL31141-R1	0.0892036	0.0892036	NE
GL26745-R1	0.111294	0.111294	NE				GL26745-R1	0.0892036	0.0892036	NE
GL24308-R1	0.111294	0.111294	NE				GL24308-R1	0.0892036	0.0892036	NE
GL30928-R1	0.111294	0.111294	NE				GL30928-R1	0.0892036	0.0892036	NE
GL29974-R1	0.111294	0.111294	NE				GL29974-R1	0.0892036	0.0892036	NE
GL29974-R2	0.111294	0.111294	NE				GL29974-R2	0.0892036	0.0892036	NE
GL24040-R1	0.111294	0	E				GL24040-R1	0.0892036	0	E
GL18122-R1	0.111294	0.111294	NE				GL18122-R1	0.0892036	0.0892036	NE
GL21691-R1	0.111294	0.111292	NE				GL21691-R1	0.0892036	0.0891907	NE
GL30625-R1	0.111294	0.111294	NE				GL30625-R1	0.0892036	0.0892036	NE
GL30624-R1	0.111294	0.111294	NE				GL30624-R1	0.0892036	0.0892036	NE
GL19803-R1	0.111294	0	E				GL19803-R1	0.0892036	0	E
GL24635-R1	0.111294	0	E				GL24635-R1	0.0892036	0	E
GL30750-R1	0.111294	0	E				GL30750-R1	0.0892036	0	E
GL20056-R1	0.111294	0.111294	NE				GL20056-R1	0.0892036	0.0892036	NE
GL26703-R1	0.111294	0.111294	NE				GL26703-R1	0.0892036	0.0892036	NE
GL18150-R1	0.111294	0.111294	NE				GL18150-R1	0.0892036	0.0892036	NE
GL27043-R1	0.111294	0.111294	NE				GL27043-R1	0.0892036	0.0892036	NE
GL27041-R1	0.111294	0.111294	NE				GL27041-R1	0.0892036	0.0892036	NE
GL31290-R1	0.111294	0.111294	NE				GL31290-R1	0.0892036	0.0892036	NE
GL22258-R1	0.111294	0.111294	NE				GL22258-R1	0.0892036	0.0892036	NE
GL30997-R1	0.111294	0.111294	NE				GL30997-R1	0.0892036	0.0892036	NE
GL18407-R1	0.111294	0.111294	NE				GL18407-R1	0.0892036	0.0892036	NE
GL31218-R1	0.111294	0.111294	NE				GL31218-R1	0.0892036	0.0892036	NE
GL23554-R1	0.111294	0.111294	NE				GL23554-R1	0.0892036	0.0892036	NE
GL28091-R1	0.111294	0	E				GL28091-R1	0.0892036	0	E
GL22808-R1	0.111294	0	E				GL22808-R1	0.0892036	0	E
GL23848-R1	0.111294	0	E				GL23848-R1	0.0892036	0	E
GL25730-R1	0.111294	0	E				GL25730-R1	0.0892036	0	E
GL25960-R1	0.111294	0.111294	NE				GL25960-R1	0.0892036	0.0892036	NE
GL24589-R2	0.111294	0.111294	NE				GL24589-R2	0.0892036	0.0892036	NE
GL24589-R1	0.111294	0.111294	NE				GL24589-R1	0.0892036	0.0892036	NE
GL23761-R1	0.111294	0.111294	NE				GL23761-R1	0.0892036	0.0892036	NE
GL25591-R1	0.111294	0.111294	NE				GL25591-R1	0.0892036	0.0892036	NE
GL24569-R1	0.111294	0.111294	NE				GL24569-R1	0.0892036	0.0892036	NE
GL24569-R2	0.111294	0.111294	NE				GL24569-R2	0.0892036	0.0892036	NE
GL16391-R1	0.111294	0.111294	NE				GL16391-R1	0.0892036	0.0892036	NE
GL25449-R1	0.111294	0.111294	NE				GL25449-R1	0.0892036	0.0892036	NE
GL18099-R1	0.111294	0.111294	NE				GL18099-R1	0.0892036	0.0892036	NE
GL28475-R1	0.111294	0.111118	NE				GL28475-R1	0.0892036	0.0879515	NE
GL26615-R1	0.111294	0	E				GL26615-R1	0.0892036	0	E
GL25758-R1	0.111294	0.111293	NE				GL25758-R1	0.0892036	0.089199	NE
GL25778-R1	0.111294	0.111294	NE				GL25778-R1	0.0892036	0.0892036	NE
GL18595-R1	0.111294	0.111294	NE				GL18595-R1	0.0892036	0.0892036	NE
GL24452-R1	0.111294	0	E				GL24452-R1	0.0892036	0	E
GL29719-R1	0.111294	0.111294	NE				GL29719-R1	0.0892036	0.0892036	NE
GL25683-R1	0.111294	0.111294	NE				GL25683-R1	0.0892036	0.0892036	NE
GL15763-R1	0.111294	0.111294	NE				GL15763-R1	0.0892036	0.0892036	NE
GL19452-R1	0.111294	0.111294	NE				GL19452-R1	0.0892036	0.0892036	NE
GL25562-R1	0.111294	0.111294	NE				GL25562-R1	0.0892036	0.0892036	NE
GL26051-R1	0.111294	0.111294	NE				GL26051-R1	0.0892036	0.0892036	NE
GL31139-R1	0.111294	0.111294	NE				GL31139-R1	0.0892036	0.0892036	NE
GL25862-R1	0.111294	0.11129	NE				GL25862-R1	0.0892036	0.0891767	NE
GL21958-R1	0.111294	0.111294	NE				GL21958-R1	0.0892036	0.0892036	NE
GL16815-R1	0.111294	0.111294	NE				GL16815-R1	0.0892036	0.0892036	NE
GL22910-R1	0.111294	0.111294	NE				GL22910-R1	0.0892036	0.0892036	NE
GL29423-R1	0.111294	0.111294	NE				GL29423-R1	0.0892036	0.0892036	NE
GL24034-R1	0.111294	0	E				GL24034-R1	0.0892036	0	E
GL24486-R1	0.111294	0.111294	NE				GL24486-R1	0.0892036	0.0892036	NE
GL30357-R1	0.111294	0.111294	NE				GL30357-R1	0.0892036	0.0892036	NE
GL24700-R1	0.111294	0.111294	NE				GL24700-R1	0.0892036	0.0892036	NE
GL26698-R1	0.111294	0.111294	NE				GL26698-R1	0.0892036	0.0892036	NE
GL23627-R1	0.111294	0.111294	NE				GL23627-R1	0.0892036	0.0892036	NE
GL24943-R1	0.111294	0	E				GL24943-R1	0.0892036	0	E
GL27634-R1	0.111294	0.111294	NE				GL27634-R1	0.0892036	0.0892036	NE
GL19660-R1	0.111294	0.111294	NE				GL19660-R1	0.0892036	0.0892036	NE
GL17915-R1	0.111294	0.111294	NE				GL17915-R1	0.0892036	0.0892036	NE
GL29355-R1	0.111294	0.111294	NE				GL29355-R1	0.0892036	0.0892036	NE
GL20927-R1	0.111294	0.111294	NE				GL20927-R1	0.0892036	0.0892036	NE
GL29324-R1	0.111294	0.111294	NE				GL29324-R1	0.0892036	0.0892036	NE
GL19135-R1	0.111294	0.111294	NE				GL19135-R1	0.0892036	0.0892036	NE
GL24906-R1	0.111294	0.111294	NE				GL24906-R1	0.0892036	0.0892036	NE
GL29916-R1	0.111294	0.111294	NE				GL29916-R1	0.0892036	0.0892036	NE
GL29343-R1	0.111294	0.111294	NE				GL29343-R1	0.0892036	0.0892036	NE
GL31522-R1	0.111294	0.111294	NE				GL31522-R1	0.0892036	0.0892036	NE
GL30063-R1	0.111294	0.111294	NE				GL30063-R1	0.0892036	0.0892036	NE
GL31331-R1	0.111294	0	E				GL31331-R1	0.0892036	0	E
GL20807-R1	0.111294	0	E				GL20807-R1	0.0892036	0	E
GL26867-R1	0.111294	0.111294	NE				GL26867-R1	0.0892036	0.0892036	NE
GL26871-R1	0.111294	0.111294	NE				GL26871-R1	0.0892036	0.0892036	NE
GL31600-R1	0.111294	0.111294	NE				GL31600-R1	0.0892036	0.0892036	NE
GL19435-R1	0.111294	0.111294	NE				GL19435-R1	0.0892036	0.0892036	NE
GL30256-R1	0.111294	0	E				GL30256-R1	0.0892036	0	E
GL30289-R1	0.111294	0	E				GL30289-R1	0.0892036	0	E
GL29370-R1	0.111294	0	E				GL29370-R1	0.0892036	0	E
GL15239-R1	0.111294	0.111294	NE				GL15239-R1	0.0892036	0.0892036	NE
GL24266-R1	0.111294	0	E				GL24266-R1	0.0892036	0	E
GL24693-R1	0.111294	0.111294	NE				GL24693-R1	0.0892036	0.0892036	NE
GL27636-R1	0.111294	0.111294	NE				GL27636-R1	0.0892036	0.0892036	NE
GL31646-R1	0.111294	0.111294	NE				GL31646-R1	0.0892036	0.0892036	NE
GL21649-R1	0.111294	0.111294	NE				GL21649-R1	0.0892036	0.0892036	NE
GL24633-R1	0.111294	0.111294	NE				GL24633-R1	0.0892036	0.0892036	NE
GL25682-R1	0.111294	0.111294	NE				GL25682-R1	0.0892036	0.0892036	NE
GL30153-R1	0.111294	0.111294	NE				GL30153-R1	0.0892036	0.0892036	NE
GL22504-R1	0.111294	0.111294	NE				GL22504-R1	0.0892036	0.0892036	NE
GL26657-R1	0.111294	0.111294	NE				GL26657-R1	0.0892036	0.0892036	NE
GL18616-R1	0.111294	0.111294	NE				GL18616-R1	0.0892036	0.0892036	NE
GL19284-R1	0.111294	0.111294	NE				GL19284-R1	0.0892036	0.0892036	NE
GL22520-R1	0.111294	0.111294	NE				GL22520-R1	0.0892036	0.0892036	NE
GL17841-R1	0.111294	0.111294	NE				GL17841-R1	0.0892036	0.0892036	NE
GL31045-R1	0.111294	0.111294	NE				GL31045-R1	0.0892036	0.0892036	NE
GL27321-R1	0.111294	0.111294	NE				GL27321-R1	0.0892036	0.0892036	NE
GL29675-R1	0.111294	0.111294	NE				GL29675-R1	0.0892036	0.0892036	NE
GL31174-R1	0.111294	0.111294	NE				GL31174-R1	0.0892036	0.0892036	NE
GL15698-R1	0.111294	0.111294	NE				GL15698-R1	0.0892036	0.0892036	NE
GL29478-R1	0.111294	0.111294	NE				GL29478-R1	0.0892036	0.0892036	NE
GL21867-R1	0.111294	0.111294	NE				GL21867-R1	0.0892036	0.0892036	NE
GL21960-R1	0.111294	0.111294	NE				GL21960-R1	0.0892036	0.0892036	NE
GL23586-R1	0.111294	0.111294	NE				GL23586-R1	0.0892036	0.0892036	NE
GL20748-R1	0.111294	0.111294	NE				GL20748-R1	0.0892036	0.0892036	NE
GL29426-R1	0.111294	0.111294	NE				GL29426-R1	0.0892036	0.0892036	NE
GL23923-R1	0.111294	0.111294	NE				GL23923-R1	0.0892036	0.0892036	NE
GL22206-R1	0.111294	0.111294	NE				GL22206-R1	0.0892036	0.0892036	NE
GL17541-R1	0.111294	0.111294	NE				GL17541-R1	0.0892036	0.0892036	NE
GL29313-R1	0.111294	0.111294	NE				GL29313-R1	0.0892036	0.0892036	NE
GL23120-R1	0.111294	0.111294	NE				GL23120-R1	0.0892036	0.0892036	NE
GL30723-R1	0.111294	0.111294	NE				GL30723-R1	0.0892036	0.0892036	NE
GL26728-R1	0.111294	0	E				GL26728-R1	0.0892036	0	E
GL22110-R1	0.111294	0.111294	NE				GL22110-R1	0.0892036	0.0892036	NE
GL23571-R1	0.111294	0.111294	NE				GL23571-R1	0.0892036	0.0892036	NE
GL20888-R1	0.111294	0.111294	NE				GL20888-R1	0.0892036	0.0892036	NE
GL31188-R1	0.111294	0.111294	NE				GL31188-R1	0.0892036	0.0892036	NE
GL24833-R1	0.111294	0.111294	NE				GL24833-R1	0.0892036	0.0892036	NE
GL24737-R1	0.111294	0.111294	NE				GL24737-R1	0.0892036	0.0892036	NE
GL21376-R1	0.111294	0.111294	NE				GL21376-R1	0.0892036	0.0892036	NE
GL20722-R1	0.111294	0.111294	NE				GL20722-R1	0.0892036	0.0892036	NE
GL30083-R1	0.111294	0.111294	NE				GL30083-R1	0.0892036	0.0892036	NE
GL22508-R1	0.111294	0	E				GL22508-R1	0.0892036	0	E
GL21392-R1	0.111294	0	E				GL21392-R1	0.0892036	0	E
GL18582-R1	0.111294	0.111294	NE				GL18582-R1	0.0892036	0.0892036	NE
GL29666-R1	0.111294	0.111294	NE				GL29666-R1	0.0892036	0.0892036	NE
GL16153-R1	0.111294	0.111294	NE				GL16153-R1	0.0892036	0.0892036	NE
GL29534-R1	0.111294	0.111294	NE				GL29534-R1	0.0892036	0.0892036	NE
GL25501-R1	0.111294	0.111294	NE				GL25501-R1	0.0892036	0.0892036	NE
GL22720-R1	0.111294	0	E				GL22720-R1	0.0892036	0	E
GL30171-R1	0.111294	0.111294	NE				GL30171-R1	0.0892036	0.0892036	NE
GL23630-R1	0.111294	0.111294	NE				GL23630-R1	0.0892036	0.0892036	NE
GL24671-R1	0.111294	0.111294	NE				GL24671-R1	0.0892036	0.0892036	NE
GL25298-R1	0.111294	0.111294	NE				GL25298-R1	0.0892036	0.0892036	NE
GL24678-R1	0.111294	0	E				GL24678-R1	0.0892036	0	E
GL24487-R1	0.111294	0.111294	NE				GL24487-R1	0.0892036	0.0892036	NE
GL16974-R1	0.111294	0.111294	NE				GL16974-R1	0.0892036	0.0892036	NE
GL21682-R1	0.111294	0.111294	NE				GL21682-R1	0.0892036	0.0892036	NE
GL20408-R1	0.111294	0.111294	NE				GL20408-R1	0.0892036	0.0892036	NE
GL31144-R1	0.111294	0.111294	NE				GL31144-R1	0.0892036	0.0892036	NE
GL31514-R1	0.111294	0.111294	NE				GL31514-R1	0.0892036	0.0892036	NE
GL25059-R1	0.111294	0.111294	NE				GL25059-R1	0.0892036	0.0892036	NE
GL28729-R1	0.111294	0.111294	NE				GL28729-R1	0.0892036	0.0892036	NE
GL22317-R1	0.111294	0.111294	NE				GL22317-R1	0.0892036	0.0892036	NE
GL26511-R1	0.111294	0.111294	NE				GL26511-R1	0.0892036	0.0892036	NE
GL27363-R1	0.111294	0.111294	NE				GL27363-R1	0.0892036	0.0892036	NE
GL21632-R1	0.111294	0.111294	NE				GL21632-R1	0.0892036	0.0892036	NE
GL30614-R1	0.111294	0.111294	NE				GL30614-R1	0.0892036	0.0892036	NE
GL24371-R1	0.111294	0.111294	NE				GL24371-R1	0.0892036	0.0892036	NE
GL20230-R1	0.111294	0.111294	NE				GL20230-R1	0.0892036	0.0892036	NE
GL24704-R1	0.111294	0.111294	NE				GL24704-R1	0.0892036	0.0892036	NE
GL22854-R1	0.111294	0.111294	NE				GL22854-R1	0.0892036	0.0892036	NE
GL23911-R1	0.111294	0.111294	NE				GL23911-R1	0.0892036	0.0892036	NE
GL25371-R1	0.111294	0.109016	NE				GL25371-R1	0.0892036	0.0727015	NE
GL21690-R1	0.111294	0	E				GL21690-R1	0.0892036	0	E
GL23376-R1	0.111294	0	E				GL23376-R1	0.0892036	0	E
GL18675-R1	0.111294	0	E				GL18675-R1	0.0892036	0	E
GL22375-R1	0.111294	0.111294	NE				GL22375-R1	0.0892036	0.0892036	NE
GL26139-R1	0.111294	0.111294	NE				GL26139-R1	0.0892036	0.0892036	NE
GL23832-R1	0.111294	0	E				GL23832-R1	0.0892036	0	E
GL23074-R1	0.111294	0	E				GL23074-R1	0.0892036	0	E
GL16838-R1	0.111294	0	E				GL16838-R1	0.0892036	0	E
GL22371-R1	0.111294	0	E				GL22371-R1	0.0892036	0	E
GL18323-R1	0.111294	0	E				GL18323-R1	0.0892036	0	E
GL26052-R1	0.111294	0	E				GL26052-R1	0.0892036	0	E
GL30444-R1	0.111294	0	E				GL30444-R1	0.0892036	0	E
GL21870-R1	0.111294	0	E				GL21870-R1	0.0892036	0	E
GL30230-R1	0.111294	0.111294	NE				GL30230-R1	0.0892036	0.0892036	NE
GL21829-R1	0.111294	0.111294	NE				GL21829-R1	0.0892036	0.0892036	NE
GL21000-R1	0.111294	0.111294	NE				GL21000-R1	0.0892036	0.0892036	NE
GL20589-R1	0.111294	0.111294	NE				GL20589-R1	0.0892036	0.0892036	NE
GL25388-R1	0.111294	0.111294	NE				GL25388-R1	0.0892036	0.0892036	NE
GL17336-R1	0.111294	0.111294	NE				GL17336-R1	0.0892036	0.0892036	NE
GL25157-R2	0.111294	0.111294	NE				GL25157-R2	0.0892036	0.0892036	NE
GL25157-R1	0.111294	0.111294	NE				GL25157-R1	0.0892036	0.0892036	NE
GL16966-R1	0.111294	0.111294	NE				GL16966-R1	0.0892036	0.0892036	NE
GL21718-R1	0.111294	0.111294	NE				GL21718-R1	0.0892036	0.0892036	NE
GL31296-R1	0.111294	0.111294	NE				GL31296-R1	0.0892036	0.0892036	NE
GL31296-R2	0.111294	0.111294	NE				GL31296-R2	0.0892036	0.0892036	NE
GL31295-R1	0.111294	0.111294	NE				GL31295-R1	0.0892036	0.0892036	NE
GL31295-R2	0.111294	0.111294	NE				GL31295-R2	0.0892036	0.0892036	NE
GL26740-R1	0.111294	0.111294	NE				GL26740-R1	0.0892036	0.0892036	NE
GL30086-R1	0.111294	0.111294	NE				GL30086-R1	0.0892036	0.0892036	NE
GL24114-R1	0.111294	0.111294	NE				GL24114-R1	0.0892036	0.0892036	NE
GL30344-R1	0.111294	0.111294	NE				GL30344-R1	0.0892036	0.0892036	NE
GL30004-R1	0.111294	0.111294	NE				GL30004-R1	0.0892036	0.0892036	NE
GL24188-R1	0.111294	0	E				GL24188-R1	0.0892036	0	E
GL23176-R1	0.111294	0.111294	NE				GL23176-R1	0.0892036	0.0892036	NE
GL26761-R1	0.111294	0.111294	NE				GL26761-R1	0.0892036	0.0892036	NE
GL27881-R1	0.111294	0.111294	NE				GL27881-R1	0.0892036	0.0892036	NE
GL23502-R1	0.111294	0.111294	NE				GL23502-R1	0.0892036	0.0892036	NE
GL25670-R1	0.111294	0.111294	NE				GL25670-R1	0.0892036	0.0892036	NE
GL21676-R1	0.111294	0.111294	NE				GL21676-R1	0.0892036	0.0892036	NE
GL30558-R1	0.111294	0	E				GL30558-R1	0.0892036	0	E
GL20137-R1	0.111294	0.111294	NE				GL20137-R1	0.0892036	0.0892036	NE
GL17560-R1	0.111294	0.111294	NE				GL17560-R1	0.0892036	0.0892036	NE
GL25919-R1	0.111294	0.111294	NE				GL25919-R1	0.0892036	0.0892036	NE
GL25919-R2	0.111294	0.111294	NE				GL25919-R2	0.0892036	0.0892036	NE
GL25107-R2	0.111294	0.111294	NE				GL25107-R2	0.0892036	0.0892036	NE
GL25107-R1	0.111294	0.111294	NE				GL25107-R1	0.0892036	0.0892036	NE
GL18154-R1	0.111294	0.111294	NE				GL18154-R1	0.0892036	0.0892036	NE
GL30752-R1	0.111294	0.111294	NE				GL30752-R1	0.0892036	0.0892036	NE
GL20908-R1	0.111294	0.111294	NE				GL20908-R1	0.0892036	0.0892036	NE
GL20908-R2	0.111294	0.111294	NE				GL20908-R2	0.0892036	0.0892036	NE
GL22223-R1	0.111294	0.111294	NE				GL22223-R1	0.0892036	0.0892036	NE
GL23646-R1	0.111294	0.111294	NE				GL23646-R1	0.0892036	0.0892036	NE
GL18436-R1	0.111294	0.111294	NE				GL18436-R1	0.0892036	0.0892036	NE
GL23180-R1	0.111294	0.111294	NE				GL23180-R1	0.0892036	0.0892036	NE
GL23589-R1	0.111294	0.111294	NE				GL23589-R1	0.0892036	0.0892036	NE
GL24088-R1	0.111294	0	E				GL24088-R1	0.0892036	0	E
GL17808-R1	0.111294	0	E				GL17808-R1	0.0892036	0	E
GL25304-R1	0.111294	0	E				GL25304-R1	0.0892036	0	E
GL29704-R1	0.111294	0	E				GL29704-R1	0.0892036	0	E
GL25499-R1	0.111294	0.111294	NE				GL25499-R1	0.0892036	0.0892036	NE
GL22068-R1	0.111294	0.111294	NE				GL22068-R1	0.0892036	0.0892036	NE
GL24453-R1	0.111294	0	E				GL24453-R1	0.0892036	0	E
GL24585-R1	0.111294	0.111294	NE				GL24585-R1	0.0892036	0.0892036	NE
GL30574-R1	0.111294	0.111294	NE				GL30574-R1	0.0892036	0.0892036	NE
GL15842-R1	0.111294	0.111294	NE				GL15842-R1	0.0892036	0.0892036	NE
GL22321-R1	0.111294	0.111294	NE				GL22321-R1	0.0892036	0.0892036	NE
GL21984-R2	0.111294	0.111294	NE				GL21984-R2	0.0892036	0.0892036	NE
GL21984-R1	0.111294	0.111294	NE				GL21984-R1	0.0892036	0.0892036	NE
GL22640-R1	0.111294	0.111294	NE				GL22640-R1	0.0892036	0.0892036	NE
GL31565-R1	0.111294	0.111294	NE				GL31565-R1	0.0892036	0.0892036	NE
GL27133-R1	0.111294	0.111294	NE				GL27133-R1	0.0892036	0.0892036	NE
GL20894-R1	0.111294	0.111294	NE				GL20894-R1	0.0892036	0.0892036	NE
GL24942-R1	0.111294	0.111294	NE				GL24942-R1	0.0892036	0.0892036	NE
GL23621-R1	0.111294	0.111294	NE				GL23621-R1	0.0892036	0.0892036	NE
GL25442-R1	0.111294	0.111294	NE				GL25442-R1	0.0892036	0.0892036	NE
GL29609-R1	0.111294	0.111294	NE				GL29609-R1	0.0892036	0.0892036	NE
GL22888-R1	0.111294	0.111294	NE				GL22888-R1	0.0892036	0.0892036	NE
GL24380-R1	0.111294	0.111294	NE				GL24380-R1	0.0892036	0.0892036	NE
GL22207-R1	0.111294	0.111294	NE				GL22207-R1	0.0892036	0.0892036	NE
GL17348-R1	0.111294	0.111294	NE				GL17348-R1	0.0892036	0.0892036	NE
GL24686-R1	0.111294	0.111294	NE				GL24686-R1	0.0892036	0.0892036	NE
GL19116-R1	0.111294	0.111294	NE				GL19116-R1	0.0892036	0.0892036	NE
GL29468-R1	0.111294	0.111294	NE				GL29468-R1	0.0892036	0.0892036	NE
GL17041-R1	0.111294	0.111294	NE				GL17041-R1	0.0892036	0.0892036	NE
GL16923-R1	0.111294	0.111294	NE				GL16923-R1	0.0892036	0.0892036	NE
GL31336-R1	0.111294	0.111294	NE				GL31336-R1	0.0892036	0.0892036	NE
GL29870-R1	0.111294	0.111294	NE				GL29870-R1	0.0892036	0.0892036	NE
GL29870-R2	0.111294	0.111294	NE				GL29870-R2	0.0892036	0.0892036	NE
GL31136-R1	0.111294	0.111294	NE				GL31136-R1	0.0892036	0.0892036	NE
GL26650-R1	0.111294	0.111294	NE				GL26650-R1	0.0892036	0.0892036	NE
GL19811-R1	0.111294	0.111294	NE				GL19811-R1	0.0892036	0.0892036	NE
GL20856-R1	0.111294	0.111294	NE				GL20856-R1	0.0892036	0.0892036	NE
GL22881-R1	0.111294	0.111294	NE				GL22881-R1	0.0892036	0.0892036	NE
GL21733-R1	0.111294	0.111294	NE				GL21733-R1	0.0892036	0.0892036	NE
GL19735-R1	0.111294	0.111294	NE				GL19735-R1	0.0892036	0.0892036	NE
GL24108-R1	0.111294	0.111294	NE				GL24108-R1	0.0892036	0.0892036	NE
GL24854-R1	0.111294	0.111294	NE				GL24854-R1	0.0892036	0.0892036	NE
GL29391-R1	0.111294	0.111294	NE				GL29391-R1	0.0892036	0.0892036	NE
GL21073-R1	0.111294	0.111294	NE				GL21073-R1	0.0892036	0.0892036	NE
GL22447-R1	0.111294	0.111294	NE				GL22447-R1	0.0892036	0.0892036	NE
GL15219-R1	0.111294	0.111294	NE				GL15219-R1	0.0892036	0.0892036	NE
GL24601-R1	0.111294	0.111294	NE				GL24601-R1	0.0892036	0.0892036	NE
GL25426-R1	0.111294	0.111294	NE				GL25426-R1	0.0892036	0.0892036	NE
GL22405-R1	0.111294	0.111294	NE				GL22405-R1	0.0892036	0.0892036	NE
GL16434-R1	0.111294	0.111294	NE				GL16434-R1	0.0892036	0.0892036	NE
GL20526-R1	0.111294	0.111294	NE				GL20526-R1	0.0892036	0.0892036	NE
GL21011-R1	0.111294	0.111294	NE				GL21011-R1	0.0892036	0.0892036	NE
GL15853-R1	0.111294	0.111294	NE				GL15853-R1	0.0892036	0.0892036	NE
GL21744-R1	0.111294	0.111294	NE				GL21744-R1	0.0892036	0.0892036	NE
GL23088-R1	0.111294	0.111294	NE				GL23088-R1	0.0892036	0.0892036	NE
GL29937-R2	0.111294	0.111294	NE				GL29937-R2	0.0892036	0.0892036	NE
GL29937-R1	0.111294	0.111294	NE				GL29937-R1	0.0892036	0.0892036	NE
GL23068-R2	0.111294	0.111294	NE				GL23068-R2	0.0892036	0.0892036	NE
GL23068-R1	0.111294	0.111294	NE				GL23068-R1	0.0892036	0.0892036	NE
GL19746-R1	0.111294	0.111294	NE				GL19746-R1	0.0892036	0.0892036	NE
GL27449-R1	0.111294	0.111294	NE				GL27449-R1	0.0892036	0.0892036	NE
GL21773-R1	0.111294	0.111294	NE				GL21773-R1	0.0892036	0.0892036	NE
GL22927-R1	0.111294	0.111294	NE				GL22927-R1	0.0892036	0.0892036	NE
GL21772-R1	0.111294	0.111294	NE				GL21772-R1	0.0892036	0.0892036	NE
GL22556-R1	0.111294	0.111294	NE				GL22556-R1	0.0892036	0.0892036	NE
GL22344-R1	0.111294	0.111294	NE				GL22344-R1	0.0892036	0.0892036	NE
GL22344-R2	0.111294	0.111294	NE				GL22344-R2	0.0892036	0.0892036	NE
GL25452-R1	0.111294	0.111294	NE				GL25452-R1	0.0892036	0.0892036	NE
GL23118-R1	0.111294	0.111294	NE				GL23118-R1	0.0892036	0.0892036	NE
GL26711-R1	0.111294	0.111294	NE				GL26711-R1	0.0892036	0.0892036	NE
GL29589-R1	0.111294	0.111294	NE				GL29589-R1	0.0892036	0.0892036	NE
GL20736-R1	0.111294	0.111294	NE				GL20736-R1	0.0892036	0.0892036	NE
GL28933-R1	0.111294	0.111294	NE				GL28933-R1	0.0892036	0.0892036	NE
GL23271-R1	0.111294	0.111294	NE				GL23271-R1	0.0892036	0.0892036	NE
GL20971-R1	0.111294	0.111294	NE				GL20971-R1	0.0892036	0.0892036	NE
GL31406-R1	0.111294	0.111294	NE				GL31406-R1	0.0892036	0.0892036	NE
GL20912-R1	0.111294	0.111294	NE				GL20912-R1	0.0892036	0.0892036	NE
GL21051-R1	0.111294	0.111294	NE				GL21051-R1	0.0892036	0.0892036	NE
GL16126-R1	0.111294	0.111294	NE				GL16126-R1	0.0892036	0.0892036	NE
GL22815-R1	0.111294	0.111294	NE				GL22815-R1	0.0892036	0.0892036	NE
GL24099-R1	0.111294	0.111294	NE				GL24099-R1	0.0892036	0.0892036	NE
GL22186-R1	0.111294	0.111294	NE				GL22186-R1	0.0892036	0.0892036	NE
GL30450-R1	0.111294	0.111294	NE				GL30450-R1	0.0892036	0.0892036	NE
GL30656-R1	0.111294	0.111294	NE				GL30656-R1	0.0892036	0.0892036	NE
GL25833-R1	0.111294	0.111294	NE				GL25833-R1	0.0892036	0.0892036	NE
GL26065-R1	0.111294	0.111294	NE				GL26065-R1	0.0892036	0.0892036	NE
GL23411-R1	0.111294	0.111294	NE				GL23411-R1	0.0892036	0.0892036	NE
GL25963-R1	0.111294	0.111294	NE				GL25963-R1	0.0892036	0.0892036	NE
GL25961-R1	0.111294	0.111294	NE				GL25961-R1	0.0892036	0.0892036	NE
GL26064-R1	0.111294	0.111294	NE				GL26064-R1	0.0892036	0.0892036	NE
GL19300-R1	0.111294	0.111294	NE				GL19300-R1	0.0892036	0.0892036	NE
GL30779-R1	0.111294	0.111294	NE				GL30779-R1	0.0892036	0.0892036	NE
GL25006-R1	0.111294	0.111294	NE				GL25006-R1	0.0892036	0.0892036	NE
GL24503-R1	0.111294	0.111294	NE				GL24503-R1	0.0892036	0.0892036	NE
GL20131-R1	0.111294	0.111294	NE				GL20131-R1	0.0892036	0.0892036	NE
GL23540-R1	0.111294	0.111294	NE				GL23540-R1	0.0892036	0.0892036	NE
GL23703-R1	0.111294	0.111294	NE				GL23703-R1	0.0892036	0.0892036	NE
GL17436-R1	0.111294	0.111294	NE				GL17436-R1	0.0892036	0.0892036	NE
GL21332-R1	0.111294	0.111294	NE				GL21332-R1	0.0892036	0.0892036	NE
GL21022-R1	0.111294	0.111294	NE				GL21022-R1	0.0892036	0.0892036	NE
GL25002-R1	0.111294	0.111294	NE				GL25002-R1	0.0892036	0.0892036	NE
GL21280-R1	0.111294	0.111294	NE				GL21280-R1	0.0892036	0.0892036	NE
GL17440-R1	0.111294	0.111294	NE				GL17440-R1	0.0892036	0.0892036	NE
GL25007-R1	0.111294	0.111294	NE				GL25007-R1	0.0892036	0.0892036	NE
GL24502-R1	0.111294	0.111294	NE				GL24502-R1	0.0892036	0.0892036	NE
GL23229-R1	0.111294	0.111294	NE				GL23229-R1	0.0892036	0.0892036	NE
GL20932-R1	0.111294	0.111294	NE				GL20932-R1	0.0892036	0.0892036	NE
GL25385-R1	0.111294	0.111294	NE				GL25385-R1	0.0892036	0.0892036	NE
GL21581-R1	0.111294	0.111294	NE				GL21581-R1	0.0892036	0.0892036	NE
GL22661-R1	0.111294	0.111294	NE				GL22661-R1	0.0892036	0.0892036	NE
GL24286-R1	0.111294	0.111294	NE				GL24286-R1	0.0892036	0.0892036	NE
GL30855-R1	0.111294	0.111294	NE				GL30855-R1	0.0892036	0.0892036	NE
GL29864-R1	0.111294	0.111294	NE				GL29864-R1	0.0892036	0.0892036	NE
GL27256-R1	0.111294	0.111294	NE				GL27256-R1	0.0892036	0.0892036	NE
GL16451-R1	0.111294	0.111294	NE				GL16451-R1	0.0892036	0.0892036	NE
GL25544-R1	0.111294	0.111294	NE				GL25544-R1	0.0892036	0.0892036	NE
GL21152-R1	0.111294	0.111294	NE				GL21152-R1	0.0892036	0.0892036	NE
GL16452-R1	0.111294	0.111294	NE				GL16452-R1	0.0892036	0.0892036	NE
GL28199-R1	0.111294	0.111294	NE				GL28199-R1	0.0892036	0.0892036	NE
GL31246-R1	0.111294	0.111294	NE				GL31246-R1	0.0892036	0.0892036	NE
GL19518-R1	0.111294	0.111294	NE				GL19518-R1	0.0892036	0.0892036	NE
GL25703-R1	0.111294	0.111294	NE				GL25703-R1	0.0892036	0.0892036	NE
GL20136-R1	0.111294	0.111294	NE				GL20136-R1	0.0892036	0.0892036	NE
GL21279-R1	0.111294	0.111294	NE				GL21279-R1	0.0892036	0.0892036	NE
GL16154-R1	0.111294	0.111294	NE				GL16154-R1	0.0892036	0.0892036	NE
GL31453-R1	0.111294	0.111294	NE				GL31453-R1	0.0892036	0.0892036	NE
GL23173-R1	0.111294	0.111294	NE				GL23173-R1	0.0892036	0.0892036	NE
GL30638-R1	0.111294	0.111294	NE				GL30638-R1	0.0892036	0.0892036	NE
GL15342-R1	0.111294	0.111294	NE				GL15342-R1	0.0892036	0.0892036	NE
GL21866-R1	0.111294	0.111294	NE				GL21866-R1	0.0892036	0.0892036	NE
GL24337-R1	0.111294	0.111294	NE				GL24337-R1	0.0892036	0.0892036	NE
GL22354-R1	0.111294	0.111294	NE				GL22354-R1	0.0892036	0.0892036	NE
GL21815-R1	0.111294	0.111294	NE				GL21815-R1	0.0892036	0.0892036	NE
GL20600-R1	0.111294	0.111294	NE				GL20600-R1	0.0892036	0.0892036	NE
GL23319-R1	0.111294	0	E				GL23319-R1	0.0892036	0	E
GL25914-R1	0.111294	0.0167512	NE				GL25914-R1	0.0892036	0	E
GL29594-R1	0.111294	0.111294	NE				GL29594-R1	0.0892036	0.0892036	NE
GL26008-R1	0.111294	0.111294	NE				GL26008-R1	0.0892036	0.0892036	NE
GL21728-R1	0.111294	0.111294	NE				GL21728-R1	0.0892036	0.0892036	NE
GL25805-R2	0.111294	0.111294	NE				GL25805-R2	0.0892036	0.0892036	NE
GL25805-R1	0.111294	0.111294	NE				GL25805-R1	0.0892036	0.0892036	NE
GL22354-R2	0.111294	0.111294	NE				GL22354-R2	0.0892036	0.0892036	NE
GL21498-R1	0.111294	0.111294	NE				GL21498-R1	0.0892036	0.0892036	NE
GL22019-R1	0.111294	0.111294	NE				GL22019-R1	0.0892036	0.0892036	NE
GL29336-R1	0.111294	0.111294	NE				GL29336-R1	0.0892036	0.0892036	NE
GL15391-R1	0.111294	0.111294	NE				GL15391-R1	0.0892036	0.0892036	NE
GL30579-R1	0.111294	0.111294	NE				GL30579-R1	0.0892036	0.0892036	NE
GL26039-R1	0.111294	0.111294	NE				GL26039-R1	0.0892036	0.0892036	NE
GL19745-R1	0.111294	0.111294	NE				GL19745-R1	0.0892036	0.0892036	NE
GL25576-R1	0.111294	0.111294	NE				GL25576-R1	0.0892036	0.0892036	NE
GL29979-R1	0.111294	0.111294	NE				GL29979-R1	0.0892036	0.0892036	NE
GL29979-R2	0.111294	0.111294	NE				GL29979-R2	0.0892036	0.0892036	NE
GL25119-R1	0.111294	0.111294	NE				GL25119-R1	0.0892036	0.0892036	NE
GL25710-R1	0.111294	0.111294	NE				GL25710-R1	0.0892036	0.0892036	NE
GL29960-R1	0.111294	0.111294	NE				GL29960-R1	0.0892036	0.0892036	NE
GL22680-R1	0.111294	0.111035	NE				GL22680-R1	0.0892036	0.0873602	NE
GL22404-R1	0.111294	0.111294	NE				GL22404-R1	0.0892036	0.0892036	NE
GL17967-R1	0.111294	0.111294	NE				GL17967-R1	0.0892036	0.0892036	NE
GL21671-R1	0.111294	0.111294	NE				GL21671-R1	0.0892036	0.0892036	NE
GL25809-R1	0.111294	0.111294	NE				GL25809-R1	0.0892036	0.0892036	NE
GL20911-R1	0.111294	0.111294	NE				GL20911-R1	0.0892036	0.0892036	NE
GL22201-R1	0.111294	0.111294	NE				GL22201-R1	0.0892036	0.0892036	NE
GL22443-R1	0.111294	0.111294	NE				GL22443-R1	0.0892036	0.0892036	NE
GL22200-R1	0.111294	0.111294	NE				GL22200-R1	0.0892036	0.0892036	NE
GL20247-R1	0.111294	0.111294	NE				GL20247-R1	0.0892036	0.0892036	NE
GL15291-R1	0.111294	0.111294	NE				GL15291-R1	0.0892036	0.0892036	NE
GL24133-R1	0.111294	0.111294	NE				GL24133-R1	0.0892036	0.0892036	NE
GL25231-R1	0.111294	0.111294	NE				GL25231-R1	0.0892036	0.0892036	NE
GL29464-R1	0.111294	0.111294	NE				GL29464-R1	0.0892036	0.0892036	NE
GL26640-R1	0.111294	0.111294	NE				GL26640-R1	0.0892036	0.0892036	NE
GL27597-R1	0.111294	0.111294	NE				GL27597-R1	0.0892036	0.0892036	NE
GL25606-R1	0.111294	0.111294	NE				GL25606-R1	0.0892036	0.0892036	NE
GL26775-R1	0.111294	0.111294	NE				GL26775-R1	0.0892036	0.0892036	NE
GL16837-R1	0.111294	0.111294	NE				GL16837-R1	0.0892036	0.0892036	NE
GL23715-R1	0.111294	0.111294	NE				GL23715-R1	0.0892036	0.0892036	NE
GL23491-R1	0.111294	0.111294	NE				GL23491-R1	0.0892036	0.0892036	NE
GL28147-R1	0.111294	0.111294	NE				GL28147-R1	0.0892036	0.0892036	NE
GL20717-R1	0.111294	0.111294	NE				GL20717-R1	0.0892036	0.0892036	NE
GL29334-R1	0.111294	0.109475	NE				GL29334-R1	0.0892036	0.0760794	NE
GL30069-R1	0.111294	0.111294	NE				GL30069-R1	0.0892036	0.0892036	NE

## Sheet: Fermentation Medium
Fermentation Medium
Essential genes for growth							Essential genes for EPS production
Rxn name	Rxn description	Formula	LB	UB	Objective		Rxn name	Rxn description	Formula	LB	UB	Objective
ex_ala[e]	D-Alanine exchange	ala[e] <=>	-0.01	1000	0		ex_ala[e]	D-Alanine exchange	ala[e] <=>	-0.01	1000	0
ex_cys[e]	L-Cysteine exchange	cys[e] <=>	-0.01	1000	0		ex_cys[e]	L-Cysteine exchange	cys[e] <=>	-0.01	1000	0
ex_arg[e]	L-Arginine exchange	arg[e] <=>	-0.01	1000	0		ex_arg[e]	L-Arginine exchange	arg[e] <=>	-0.01	1000	0
ex_asn[e]	L-Asparagine exchange	asn[e] <=>	-0.01	1000	0		ex_asn[e]	L-Asparagine exchange	asn[e] <=>	-0.01	1000	0
ex_asp[e]	L-Aspartate exchange	asp[e] <=>	-0.01	1000	0		ex_asp[e]	L-Aspartate exchange	asp[e] <=>	-0.01	1000	0
ex_gln[e]	L-Glutamine exchange	gln[e] <=>	-0.01	1000	0		ex_gln[e]	L-Glutamine exchange	gln[e] <=>	-0.01	1000	0
ex_glu[e]	L-Glutamate exchange	glu[e] <=>	-0.01	1000	0		ex_glu[e]	L-Glutamate exchange	glu[e] <=>	-0.01	1000	0
ex_gly[e]	Glycine exchange	gly[e] <=>	-0.01	1000	0		ex_gly[e]	Glycine exchange	gly[e] <=>	-0.01	1000	0
ex_his[e]	L-Histidine exchange	his[e] <=>	-0.01	1000	0		ex_his[e]	L-Histidine exchange	his[e] <=>	-0.01	1000	0
ex_ile[e]	L-Isoleucine exchange	ile[e] <=>	-0.01	1000	0		ex_ile[e]	L-Isoleucine exchange	ile[e] <=>	-0.01	1000	0
ex_leu[e]	L-Leucine exchange	leu[e] <=>	-0.01	1000	0		ex_leu[e]	L-Leucine exchange	leu[e] <=>	-0.01	1000	0
ex_lys[e]	L-Lysine exchange	lys[e] <=>	-0.01	1000	0		ex_lys[e]	L-Lysine exchange	lys[e] <=>	-0.01	1000	0
ex_met[e]	L-Methionine exchange	met[e] <=>	-0.01	1000	0		ex_met[e]	L-Methionine exchange	met[e] <=>	-0.01	1000	0
ex_phe[e]	L-Phenylalanine exchange	phe[e] <=>	-0.01	1000	0		ex_phe[e]	L-Phenylalanine exchange	phe[e] <=>	-0.01	1000	0
ex_pro[e]	L-Proline exchange	pro[e] <=>	-0.01	1000	0		ex_pro[e]	L-Proline exchange	pro[e] <=>	-0.01	1000	0
ex_ser[e]	L-Serine exchange	ser[e] <=>	-0.01	1000	0		ex_ser[e]	L-Serine exchange	ser[e] <=>	-0.01	1000	0
ex_thr[e]	L-Threonine exchange	thr[e] <=>	-0.01	1000	0		ex_thr[e]	L-Threonine exchange	thr[e] <=>	-0.01	1000	0
ex_trp[e]	L-Tryptophan exchange	trp[e] <=>	-0.01	1000	0		ex_trp[e]	L-Tryptophan exchange	trp[e] <=>	-0.01	1000	0
ex_tyr[e]	L-Tyrosine exchange	tyr[e] <=>	-0.01	1000	0		ex_tyr[e]	L-Tyrosine exchange	tyr[e] <=>	-0.01	1000	0
ex_val[e]	L-Valine exchange	val[e] <=>	-0.01	1000	0		ex_val[e]	L-Valine exchange	val[e] <=>	-0.01	1000	0
ex_slf[e]	sulfate exchange	slf[e] <=>	-1000	1000	0		ex_slf[e]	sulfate exchange	slf[e] <=>	-1000	1000	0
ex_glc[e]	D-Glucose exchange	glc[e] <=>	-1	1000	0		ex_glc[e]	D-Glucose exchange	glc[e] <=>	-1	1000	0
ex_h[e]	H+ exchange	h[e] <=>	-1000	1000	0		ex_h[e]	H+ exchange	h[e] <=>	-1000	1000	0
ex_h2o[e]	H2O exchange	h2o[e] <=>	-1000	1000	0		ex_h2o[e]	H2O exchange	h2o[e] <=>	-1000	1000	0
ex_nh3[e]	Ammonia exchange	nh3[e] <=>	-1000	1000	0		ex_nh3[e]	Ammonia exchange	nh3[e] <=>	-1000	1000	0
ex_pi[e]	Phosphate exchange	pi[e] <=>	-1000	1000	0		ex_pi[e]	Phosphate exchange	pi[e] <=>	-1000	1000	0
ex_o2[e]	O2 exchange	o2[e] <=>	-1000	1000	0		ex_o2[e]	O2 exchange	o2[e] <=>	-1000	1000	0
IPS	IPS synthase	0.05717 gdpman[c] + 0.05677 udpglac[c] + 0.88092 udpglc[c] + 0.0012 udpxyl[c] + 0.0004 udpara[c] + 0.00051 dtdprmn[c] + 0.00303 gdpfuc[c] + atp[c] + h2o[c] -> IPS[c] + 0.93929 udp[c] + 0.0602 gdp[c] + 0.00051 dtdp[c] + adp[c] + pi[c]	0	1000	0		IPS	IPS synthase	0.05717 gdpman[c] + 0.05677 udpglac[c] + 0.88092 udpglc[c] + 0.0012 udpxyl[c] + 0.0004 udpara[c] + 0.00051 dtdprmn[c] + 0.00303 gdpfuc[c] + atp[c] + h2o[c] -> IPS[c] + 0.93929 udp[c] + 0.0602 gdp[c] + 0.00051 dtdp[c] + adp[c] + pi[c]	0	1000	1
biomass	Biomass fraction	67.83676 atp[c] + 67.83676 h2o[c] + 0.24508 chit[c] + 0.82138 13glucan[c] + 0.23846 14glucan[c] + 0.17023 gdpman[c] + 0.27464 ala[c] + 0.11218 arg[c] + 0.08017 asn[c] + 0.22526 asp[c] + 0.01198 cys[c] + 0.09252 gln[c] + 0.31639 glu[c] + 0.26387 gly[c] + 0.06728 his[c] + 0.12305 ile[c] + 0.16114 leu[c] + 0.12599 lys[c] + 0.05496 met[c] + 0.09328 phe[c] + 0.12958 pro[c] + 0.12918 ser[c] + 0.11687 t…	0	1000	1		biomass	Biomass fraction	67.83676 atp[c] + 67.83676 h2o[c] + 0.24508 chit[c] + 0.82138 13glucan[c] + 0.23846 14glucan[c] + 0.17023 gdpman[c] + 0.27464 ala[c] + 0.11218 arg[c] + 0.08017 asn[c] + 0.22526 asp[c] + 0.01198 cys[c] + 0.09252 gln[c] + 0.31639 glu[c] + 0.26387 gly[c] + 0.06728 his[c] + 0.12305 ile[c] + 0.16114 leu[c] + 0.12599 lys[c] + 0.05496 met[c] + 0.09328 phe[c] + 0.12958 pro[c] + 0.12918 ser[c] + 0.11687 t…	0.1	0.1	0
Single Gene Deletion	growth Rate(wild type)	growth Rate(after knock out)	Identify				Single Gene Deletion	EPS prodution Rate(wild type)	EPS prodution Rate(after knock out)	Identify
GL25699-R1	0.133469	0.133444	NE	Essential genes	88		GL25699-R1	0.257846	0.257701	NE	Essential genes	106
GL18551-R1	0.133469	0.133469	NE				GL18551-R1	0.257846	0.257846	NE
GL21313-R1	0.133469	0.117162	NE				GL21313-R1	0.257846	0.150948	NE
GL30174-R1	0.133469	0.133469	NE				GL30174-R1	0.257846	0.257846	NE
GL24130-R1	0.133469	0.133469	NE				GL24130-R1	0.257846	0.257846	NE
GL23433-R1	0.133469	0.133469	NE				GL23433-R1	0.257846	0.257846	NE
GL20614-R1	0.133469	0.133469	NE				GL20614-R1	0.257846	0.257846	NE
GL20474-R1	0.133469	0.133469	NE				GL20474-R1	0.257846	0.257846	NE
GL24484-R1	0.133469	0.133469	NE				GL24484-R1	0.257846	0.257846	NE
GL21912-R1	0.133469	0	E				GL21912-R1	0.257846	0	E
GL29739-R1	0.133469	0.122233	NE				GL29739-R1	0.257846	0.184591	NE
GL31574-R1	0.133469	0.133469	NE				GL31574-R1	0.257846	0.257846	NE
GL26783-R1	0.133469	0.133469	NE				GL26783-R1	0.257846	0.257846	NE
GL20491-R1	0.133469	0.133469	NE				GL20491-R1	0.257846	0.257846	NE
GL20491-R2	0.133469	0.133469	NE				GL20491-R2	0.257846	0.257846	NE
GL26108-R1	0.133469	0.126965	NE				GL26108-R1	0.257846	0.218647	NE
GL30680-R1	0.133469	0	E				GL30680-R1	0.257846	0	E
GL24591-R1	0.133469	0.133469	NE				GL24591-R1	0.257846	0.257846	NE
GL24591-R2	0.133469	0.133469	NE				GL24591-R2	0.257846	0.257846	NE
GL25620-R1	0.133469	0.133469	NE				GL25620-R1	0.257846	0.257846	NE
GL23682-R1	0.133469	0.133469	NE				GL23682-R1	0.257846	0.257846	NE
GL25136-R1	0.133469	0.133469	NE				GL25136-R1	0.257846	0.257846	NE
GL30114-R1	0.133469	0.124325	NE				GL30114-R1	0.257846	0.200802	NE
GL30389-R1	0.133469	0.133469	NE				GL30389-R1	0.257846	0.257846	NE
GL29575-R1	0.133469	0.133469	NE				GL29575-R1	0.257846	0.257846	NE
GL22268-R1	0.133469	0.127003	NE				GL22268-R1	0.257846	0.218895	NE
GL22245-R1	0.133469	0.131084	NE				GL22245-R1	0.257846	0.243639	NE
GL30887-R1	0.133469	0.133469	NE				GL30887-R1	0.257846	0.257846	NE
GL30675-R1	0.133469	0.133469	NE				GL30675-R1	0.257846	0.257846	NE
GL24743-R1	0.133469	0.133469	NE				GL24743-R1	0.257846	0.257846	NE
GL24280-R1	0.133469	0	E				GL24280-R1	0.257846	0	E
GL18639-R1	0.133469	0.133469	NE				GL18639-R1	0.257846	0.257846	NE
GL20510-R1	0.133469	0.133469	NE				GL20510-R1	0.257846	0.257846	NE
GL21190-R1	0.133469	0.133469	NE				GL21190-R1	0.257846	0.257846	NE
GL21227-R1	0.133469	0.133469	NE				GL21227-R1	0.257846	0.257846	NE
GL21268-R1	0.133469	0.133469	NE				GL21268-R1	0.257846	0.257846	NE
GL22543-R1	0.133469	0.133469	NE				GL22543-R1	0.257846	0.257846	NE
GL23139-R1	0.133469	0.133469	NE				GL23139-R1	0.257846	0.257846	NE
GL23318-R1	0.133469	0.133469	NE				GL23318-R1	0.257846	0.257846	NE
GL23332-R1	0.133469	0.133469	NE				GL23332-R1	0.257846	0.257846	NE
GL23735-R1	0.133469	0.133469	NE				GL23735-R1	0.257846	0.257846	NE
GL27989-R1	0.133469	0.133469	NE				GL27989-R1	0.257846	0.257846	NE
GL27997-R1	0.133469	0.133469	NE				GL27997-R1	0.257846	0.257846	NE
GL30345-R1	0.133469	0.133469	NE				GL30345-R1	0.257846	0.257846	NE
GL30307-R1	0.133469	0.133469	NE				GL30307-R1	0.257846	0.257846	NE
GL25812-R1	0.133469	0.133469	NE				GL25812-R1	0.257846	0.257846	NE
GL26632-R1	0.133469	0.133469	NE				GL26632-R1	0.257846	0.257846	NE
GL31424-R1	0.133469	0.133469	NE				GL31424-R1	0.257846	0.257846	NE
GL31294-R1	0.133469	0.133469	NE				GL31294-R1	0.257846	0.257846	NE
GL20007-R1	0.133469	0.133469	NE				GL20007-R1	0.257846	0.257846	NE
GL22784-R1	0.133469	0.133469	NE				GL22784-R1	0.257846	0.257846	NE
GL26678-R1	0.133469	0.133469	NE				GL26678-R1	0.257846	0.257846	NE
GL30130-R1	0.133469	0.133469	NE				GL30130-R1	0.257846	0.257846	NE
GL30803-R1	0.133469	0.133469	NE				GL30803-R1	0.257846	0.257846	NE
GL15965-R1	0.133469	0.124106	NE				GL15965-R1	0.257846	0.194615	NE
GL22647-R1	0.133469	0.124106	NE				GL22647-R1	0.257846	0.194615	NE
GL15437-R1	0.133469	0	E				GL15437-R1	0.257846	0	E
GL15912-R1	0.133469	0	E				GL15912-R1	0.257846	0	E
GL22227-R1	0.133469	0	E				GL22227-R1	0.257846	0	E
GL24204-R1	0.133469	0	E				GL24204-R1	0.257846	0	E
GL20821-R1	0.133469	0	E				GL20821-R1	0.257846	0	E
GL20259-R1	0.133469	0.133469	NE				GL20259-R1	0.257846	0.257846	NE
GL24555-R1	0.133469	0.133469	NE				GL24555-R1	0.257846	0.257846	NE
GL25890-R1	0.133469	0.133469	NE				GL25890-R1	0.257846	0.257846	NE
GL25890-R2	0.133469	0.133469	NE				GL25890-R2	0.257846	0.257846	NE
GL22137-R1	0.133469	0.133469	NE				GL22137-R1	0.257846	0.257846	NE
GL30076-R1	0.133469	0.0793714	NE				GL30076-R1	0.257846	0	E
GL29422-R1	0.133469	0.133469	NE				GL29422-R1	0.257846	0.257846	NE
GL30218-R1	0.133469	0	E				GL30218-R1	0.257846	0	E
GL18572-R1	0.133469	0.133469	NE				GL18572-R1	0.257846	0.257846	NE
GL29907-R1	0.133469	0.133469	NE				GL29907-R1	0.257846	0.257846	NE
GL29894-R1	0.133469	0.133469	NE				GL29894-R1	0.257846	0.257846	NE
GL30631-R1	0.133469	0.133469	NE				GL30631-R1	0.257846	0.257846	NE
GL21673-R1	0.133469	0.133245	NE				GL21673-R1	0.257846	0.257272	NE
GL24045-R1	0.133469	0.133469	NE				GL24045-R1	0.257846	0.257846	NE
GL30487-R1	0.133469	0.133469	NE				GL30487-R1	0.257846	0.257846	NE
GL31587-R1	0.133469	0.133469	NE				GL31587-R1	0.257846	0.257846	NE
GL22212-R1	0.133469	0.133469	NE				GL22212-R1	0.257846	0.257846	NE
GL30545-R1	0.133469	0.133469	NE				GL30545-R1	0.257846	0.257846	NE
GL17591-R1	0.133469	0.133469	NE				GL17591-R1	0.257846	0.257846	NE
GL18111-R1	0.133469	0.133469	NE				GL18111-R1	0.257846	0.257846	NE
GL27743-R1	0.133469	0.133469	NE				GL27743-R1	0.257846	0.257846	NE
GL29962-R1	0.133469	0.133469	NE				GL29962-R1	0.257846	0.257846	NE
GL21112-R1	0.133469	0.133469	NE				GL21112-R1	0.257846	0.257846	NE
GL27113-R1	0.133469	0.133469	NE				GL27113-R1	0.257846	0.257846	NE
GL30214-R1	0.133469	0.133469	NE				GL30214-R1	0.257846	0.257846	NE
GL29005-R1	0.133469	0.133469	NE				GL29005-R1	0.257846	0.257846	NE
GL30294-R1	0.133469	0.133399	NE				GL30294-R1	0.257846	0.257495	NE
GL21223-R1	0.133469	0.132567	NE				GL21223-R1	0.257846	0.253285	NE
GL18988-R1	0.133469	0.133469	NE				GL18988-R1	0.257846	0.257846	NE
GL31661-R1	0.133469	0.133469	NE				GL31661-R1	0.257846	0.257846	NE
GL18437-R1	0.133469	0.133469	NE				GL18437-R1	0.257846	0	E
GL24619-R1	0.133469	0.133469	NE				GL24619-R1	0.257846	0.257846	NE
GL17001-R1	0.133469	0.133469	NE				GL17001-R1	0.257846	0.257846	NE
GL22336-R1	0.133469	0.133469	NE				GL22336-R1	0.257846	0.257846	NE
GL24037-R1	0.133469	0.133469	NE				GL24037-R1	0.257846	0.257846	NE
GL29728-R1	0.133469	0.133469	NE				GL29728-R1	0.257846	0.257846	NE
GL18694-R1	0.133469	0.133469	NE				GL18694-R1	0.257846	0.257846	NE
GL21997-R1	0.133469	0.133469	NE				GL21997-R1	0.257846	0.257846	NE
GL25739-R1	0.133469	0	E				GL25739-R1	0.257846	0	E
GL20228-R1	0.133469	0.133469	NE				GL20228-R1	0.257846	0.257846	NE
GL31324-R1	0.133469	0.133469	NE				GL31324-R1	0.257846	0.257846	NE
GL29967-R1	0.133469	0.133469	NE				GL29967-R1	0.257846	0.257846	NE
GL24037-R2	0.133469	0.133469	NE				GL24037-R2	0.257846	0.257846	NE
GL19432-R1	0.133469	0	E				GL19432-R1	0.257846	0	E
GL21002-R1	0.133469	0.133469	NE				GL21002-R1	0.257846	0	E
GL20873-R1	0.133469	0.133469	NE				GL20873-R1	0.257846	0.257846	NE
GL25424-R1	0.133469	0	E				GL25424-R1	0.257846	0	E
GL20928-R1	0.133469	0.133469	NE				GL20928-R1	0.257846	0	E
GL17878-R1	0.133469	0.133469	NE				GL17878-R1	0.257846	0.257846	NE
GL22193-R1	0.133469	0.133469	NE				GL22193-R1	0.257846	0.257846	NE
GL20742-R1	0.133469	0.133469	NE				GL20742-R1	0.257846	0.257846	NE
GL21817-R1	0.133469	0.133469	NE				GL21817-R1	0.257846	0.257846	NE
GL29012-R1	0.133469	0.133469	NE				GL29012-R1	0.257846	0.257846	NE
GL21219-R1	0.133469	0.133469	NE				GL21219-R1	0.257846	0.257846	NE
GL21399-R1	0.133469	0.133469	NE				GL21399-R1	0.257846	0.257846	NE
GL22642-R1	0.133469	0.133469	NE				GL22642-R1	0.257846	0.257846	NE
GL17052-R1	0.133469	0.133469	NE				GL17052-R1	0.257846	0.257846	NE
GL22859-R1	0.133469	0.133469	NE				GL22859-R1	0.257846	0.257846	NE
GL30020-R1	0.133469	0.133469	NE				GL30020-R1	0.257846	0.257846	NE
GL30117-R1	0.133469	0.133469	NE				GL30117-R1	0.257846	0.257846	NE
GL30925-R1	0.133469	0.133469	NE				GL30925-R1	0.257846	0.257846	NE
GL30116-R1	0.133469	0.133469	NE				GL30116-R1	0.257846	0.257846	NE
GL21024-R1	0.133469	0.133469	NE				GL21024-R1	0.257846	0.257846	NE
GL25150-R1	0.133469	0.133469	NE				GL25150-R1	0.257846	0.257846	NE
GL25150-R2	0.133469	0.133469	NE				GL25150-R2	0.257846	0.257846	NE
GL30909-R1	0.133469	0.133469	NE				GL30909-R1	0.257846	0.257846	NE
GL23450-R1	0.133469	0.133469	NE				GL23450-R1	0.257846	0.257846	NE
GL19397-R1	0.133469	0.133469	NE				GL19397-R1	0.257846	0.257846	NE
GL22434-R1	0.133469	0.133469	NE				GL22434-R1	0.257846	0.257846	NE
GL21375-R1	0.133469	0.133469	NE				GL21375-R1	0.257846	0.257846	NE
GL21929-R1	0.133469	0.133469	NE				GL21929-R1	0.257846	0.257846	NE
GL24505-R1	0.133469	0.133469	NE				GL24505-R1	0.257846	0.257846	NE
GL26631-R1	0.133469	0.133469	NE				GL26631-R1	0.257846	0.257846	NE
GL21852-R1	0.133469	0.133469	NE				GL21852-R1	0.257846	0.257846	NE
GL21617-R1	0.133469	0.133469	NE				GL21617-R1	0.257846	0.257846	NE
GL20698-R1	0.133469	0.133469	NE				GL20698-R1	0.257846	0.257846	NE
GL20698-R2	0.133469	0.133469	NE				GL20698-R2	0.257846	0.257846	NE
GL20848-R1	0.133469	0.133469	NE				GL20848-R1	0.257846	0.257846	NE
GL21844-R1	0.133469	0.133469	NE				GL21844-R1	0.257846	0.257846	NE
GL21844-R2	0.133469	0.133469	NE				GL21844-R2	0.257846	0.257846	NE
GL30115-R1	0.133469	0.133469	NE				GL30115-R1	0.257846	0.257846	NE
GL24971-R1	0.133469	0	E				GL24971-R1	0.257846	0	E
GL21342-R1	0.133469	0.133469	NE				GL21342-R1	0.257846	0.257846	NE
GL26018-R1	0.133469	0.133469	NE				GL26018-R1	0.257846	0.257846	NE
GL22527-R1	0.133469	0.133469	NE				GL22527-R1	0.257846	0.257846	NE
GL31461-R1	0.133469	0.133469	NE				GL31461-R1	0.257846	0.257846	NE
GL18711-R1	0.133469	0.133469	NE				GL18711-R1	0.257846	0.257846	NE
GL20535-R1	0.133469	0.133469	NE				GL20535-R1	0.257846	0.257846	NE
GL24465-R1	0.133469	0.133469	NE				GL24465-R1	0.257846	0.257846	NE
GL27531-R1	0.133469	0.133469	NE				GL27531-R1	0.257846	0.257846	NE
GL24914-R1	0.133469	0.133469	NE				GL24914-R1	0.257846	0.257846	NE
GL15361-R1	0.133469	0.133469	NE				GL15361-R1	0.257846	0.257846	NE
GL26000-R1	0.133469	0.133469	NE				GL26000-R1	0.257846	0.257846	NE
GL20553-R1	0.133469	0.133469	NE				GL20553-R1	0.257846	0.257846	NE
GL24039-R1	0.133469	0.133469	NE				GL24039-R1	0.257846	0.257846	NE
GL30154-R1	0.133469	0.133469	NE				GL30154-R1	0.257846	0.257846	NE
GL19708-R1	0.133469	0.133469	NE				GL19708-R1	0.257846	0.257846	NE
GL20743-R1	0.133469	0.133469	NE				GL20743-R1	0.257846	0.257846	NE
GL27550-R1	0.133469	0.133469	NE				GL27550-R1	0.257846	0.257846	NE
GL29912-R1	0.133469	0.133469	NE				GL29912-R1	0.257846	0.257846	NE
GL29918-R1	0.133469	0.133469	NE				GL29918-R1	0.257846	0.257846	NE
GL29918-R2	0.133469	0.133469	NE				GL29918-R2	0.257846	0.257846	NE
GL24911-R1	0.133469	0.133469	NE				GL24911-R1	0.257846	0.257846	NE
GL27561-R1	0.133469	0.133469	NE				GL27561-R1	0.257846	0.257846	NE
GL24361-R1	0.133469	0.133469	NE				GL24361-R1	0.257846	0.257846	NE
GL26035-R1	0.133469	0.133469	NE				GL26035-R1	0.257846	0.257846	NE
GL23580-R1	0.133469	0.133469	NE				GL23580-R1	0.257846	0.257846	NE
GL23600-R1	0.133469	0.133469	NE				GL23600-R1	0.257846	0.257846	NE
GL19093-R1	0.133469	0.133469	NE				GL19093-R1	0.257846	0.257846	NE
GL22586-R1	0.133469	0.133469	NE				GL22586-R1	0.257846	0.257846	NE
GL22886-R1	0.133469	0.133469	NE				GL22886-R1	0.257846	0.257846	NE
GL21370-R1	0.133469	0.133469	NE				GL21370-R1	0.257846	0.257846	NE
GL24581-R1	0.133469	0.133469	NE				GL24581-R1	0.257846	0.257846	NE
GL24581-R2	0.133469	0.133469	NE				GL24581-R2	0.257846	0.257846	NE
GL21451-R1	0.133469	0.133469	NE				GL21451-R1	0.257846	0.257846	NE
GL23395-R1	0.133469	0.133469	NE				GL23395-R1	0.257846	0.257846	NE
GL30087-R1	0.133469	0.133469	NE				GL30087-R1	0.257846	0.257846	NE
GL25895-R1	0.133469	0.133469	NE				GL25895-R1	0.257846	0.257846	NE
GL18725-R1	0.133469	0.133469	NE				GL18725-R1	0.257846	0.257846	NE
GL24712-R1	0.133469	0.133469	NE				GL24712-R1	0.257846	0.257846	NE
GL29727-R1	0.133469	0.133469	NE				GL29727-R1	0.257846	0.257846	NE
GL30351-R1	0.133469	0.133469	NE				GL30351-R1	0.257846	0.257846	NE
GL26652-R1	0.133469	0.133469	NE				GL26652-R1	0.257846	0	E
GL16576-R1	0.133469	0.133469	NE				GL16576-R1	0.257846	0.257846	NE
GL22204-R1	0.133469	0	E				GL22204-R1	0.257846	0	E
GL18134-R1	0.133469	0.133469	NE				GL18134-R1	0.257846	0.257846	NE
GL27380-R1	0.133469	0.133469	NE				GL27380-R1	0.257846	0.257846	NE
GL28060-R1	0.133469	0.133469	NE				GL28060-R1	0.257846	0.257846	NE
GL30737-R1	0.133469	0.133469	NE				GL30737-R1	0.257846	0.257846	NE
GL30799-R1	0.133469	0.133469	NE				GL30799-R1	0.257846	0.257846	NE
GL31550-R1	0.133469	0.133469	NE				GL31550-R1	0.257846	0.257846	NE
GL27969-R1	0.133469	0.133469	NE				GL27969-R1	0.257846	0.257846	NE
GL25613-R1	0.133469	0.133469	NE				GL25613-R1	0.257846	0.257846	NE
GL15273-R1	0.133469	0.133469	NE				GL15273-R1	0.257846	0.257846	NE
GL26730-R1	0.133469	0.133469	NE				GL26730-R1	0.257846	0.257846	NE
GL18900-R1	0.133469	0	E				GL18900-R1	0.257846	0	E
GL30088-R1	0.133469	0	E				GL30088-R1	0.257846	0	E
GL15508-R1	0.133469	0.133469	NE				GL15508-R1	0.257846	0.257846	NE
GL15547-R1	0.133469	0.133469	NE				GL15547-R1	0.257846	0.257846	NE
GL15744-R1	0.133469	0.133469	NE				GL15744-R1	0.257846	0.257846	NE
GL17045-R1	0.133469	0.133469	NE				GL17045-R1	0.257846	0.257846	NE
GL17093-R1	0.133469	0.133469	NE				GL17093-R1	0.257846	0.257846	NE
GL17641-R1	0.133469	0.133469	NE				GL17641-R1	0.257846	0.257846	NE
GL18544-R1	0.133469	0.133469	NE				GL18544-R1	0.257846	0.257846	NE
GL20391-R1	0.133469	0.133469	NE				GL20391-R1	0.257846	0.257846	NE
GL21171-R1	0.133469	0.133469	NE				GL21171-R1	0.257846	0.257846	NE
GL22147-R1	0.133469	0.133469	NE				GL22147-R1	0.257846	0.257846	NE
GL24065-R1	0.133469	0.133469	NE				GL24065-R1	0.257846	0.257846	NE
GL24125-R1	0.133469	0.133469	NE				GL24125-R1	0.257846	0.257846	NE
GL24153-R1	0.133469	0.133469	NE				GL24153-R1	0.257846	0.257846	NE
GL24153-R2	0.133469	0.133469	NE				GL24153-R2	0.257846	0.257846	NE
GL24162-R1	0.133469	0.133469	NE				GL24162-R1	0.257846	0.257846	NE
GL24217-R1	0.133469	0.133469	NE				GL24217-R1	0.257846	0.257846	NE
GL24235-R1	0.133469	0.133469	NE				GL24235-R1	0.257846	0.257846	NE
GL24376-R1	0.133469	0.133469	NE				GL24376-R1	0.257846	0.257846	NE
GL25033-R1	0.133469	0.133469	NE				GL25033-R1	0.257846	0.257846	NE
GL25627-R1	0.133469	0.133469	NE				GL25627-R1	0.257846	0.257846	NE
GL25816-R1	0.133469	0.133469	NE				GL25816-R1	0.257846	0.257846	NE
GL25941-R1	0.133469	0.133469	NE				GL25941-R1	0.257846	0.257846	NE
GL28316-R1	0.133469	0.133469	NE				GL28316-R1	0.257846	0.257846	NE
GL29255-R1	0.133469	0.133469	NE				GL29255-R1	0.257846	0.257846	NE
GL31157-R1	0.133469	0.133469	NE				GL31157-R1	0.257846	0.257846	NE
GL22188-R1	0.133469	0.133469	NE				GL22188-R1	0.257846	0.257846	NE
GL26040-R1	0.133469	0.133469	NE				GL26040-R1	0.257846	0.257846	NE
GL15526-R1	0.133469	0.133469	NE				GL15526-R1	0.257846	0.257846	NE
GL18102-R1	0.133469	0.133469	NE				GL18102-R1	0.257846	0.257846	NE
GL24346-R1	0.133469	0.133469	NE				GL24346-R1	0.257846	0.257846	NE
GL24347-R1	0.133469	0.133469	NE				GL24347-R1	0.257846	0.257846	NE
GL24347-R2	0.133469	0.133469	NE				GL24347-R2	0.257846	0.257846	NE
GL24372-R1	0.133469	0.133469	NE				GL24372-R1	0.257846	0.257846	NE
GL29544-R1	0.133469	0.133469	NE				GL29544-R1	0.257846	0.257846	NE
GL24032-R1	0.133469	0.133469	NE				GL24032-R1	0.257846	0.257846	NE
GL24176-R1	0.133469	0.133469	NE				GL24176-R1	0.257846	0.257846	NE
GL29877-R1	0.133469	0.133469	NE				GL29877-R1	0.257846	0.257846	NE
GL29877-R2	0.133469	0.133469	NE				GL29877-R2	0.257846	0.257846	NE
GL25288-R1	0.133469	0.133469	NE				GL25288-R1	0.257846	0.257846	NE
GL30958-R1	0.133469	0	E				GL30958-R1	0.257846	0	E
GL22560-R1	0.133469	0.133469	NE				GL22560-R1	0.257846	0.257846	NE
GL22224-R1	0.133469	0.133469	NE				GL22224-R1	0.257846	0.257846	NE
GL18839-R1	0.133469	0.133469	NE				GL18839-R1	0.257846	0.257846	NE
GL22235-R1	0.133469	0.133469	NE				GL22235-R1	0.257846	0.257846	NE
GL22251-R1	0.133469	0.133469	NE				GL22251-R1	0.257846	0.257846	NE
GL17003-R1	0.133469	0.133444	NE				GL17003-R1	0.257846	0.257701	NE
GL22666-R1	0.133469	0.133469	NE				GL22666-R1	0.257846	0.257846	NE
GL18633-R1	0.133469	0.133469	NE				GL18633-R1	0.257846	0.257846	NE
GL30499-R1	0.133469	0.133469	NE				GL30499-R1	0.257846	0.257846	NE
GL21586-R1	0.133469	0.133469	NE				GL21586-R1	0.257846	0.257846	NE
GL15784-R1	0.133469	0.133469	NE				GL15784-R1	0.257846	0.257846	NE
GL25048-R1	0.133469	0.133469	NE				GL25048-R1	0.257846	0.257846	NE
GL29921-R1	0.133469	0.133469	NE				GL29921-R1	0.257846	0.257846	NE
GL26574-R1	0.133469	0.132576	NE				GL26574-R1	0.257846	0.245697	NE
GL19766-R1	0.133469	0.133469	NE				GL19766-R1	0.257846	0.257846	NE
GL22590-R1	0.133469	0.133469	NE				GL22590-R1	0.257846	0.257846	NE
GL23465-R1	0.133469	0.133469	NE				GL23465-R1	0.257846	0.257818	NE
GL17906-R1	0.133469	0.133469	NE				GL17906-R1	0.257846	0.257846	NE
GL19012-R1	0.133469	0.133469	NE				GL19012-R1	0.257846	0.257846	NE
GL23873-R1	0.133469	0.133311	NE				GL23873-R1	0.257846	0.257456	NE
GL23384-R1	0.133469	0.133469	NE				GL23384-R1	0.257846	0.257846	NE
GL21959-R1	0.133469	0	E				GL21959-R1	0.257846	0	E
GL22189-R1	0.133469	0.133469	NE				GL22189-R1	0.257846	0.257846	NE
GL29881-R1	0.133469	0.133469	NE				GL29881-R1	0.257846	0.257846	NE
GL26833-R1	0.133469	0.133469	NE				GL26833-R1	0.257846	0.257846	NE
GL23379-R1	0.133469	0.133366	NE				GL23379-R1	0.257846	0.255313	NE
GL21526-R1	0.133469	0.133469	NE				GL21526-R1	0.257846	0.257846	NE
GL26132-R1	0.133469	0.133469	NE				GL26132-R1	0.257846	0.257846	NE
GL29056-R1	0.133469	0.133469	NE				GL29056-R1	0.257846	0.257846	NE
GL23705-R1	0.133469	0.133469	NE				GL23705-R1	0.257846	0.257846	NE
GL26002-R1	0.133469	0.133469	NE				GL26002-R1	0.257846	0.257846	NE
GL23590-R1	0.133469	0.133469	NE				GL23590-R1	0.257846	0.257846	NE
GL30707-R1	0.133469	0.133469	NE				GL30707-R1	0.257846	0.257846	NE
GL24433-R1	0.133469	0.133469	NE				GL24433-R1	0.257846	0.257846	NE
GL24433-R2	0.133469	0.133469	NE				GL24433-R2	0.257846	0.257846	NE
GL22166-R1	0.133469	0.133469	NE				GL22166-R1	0.257846	0.257846	NE
GL22166-R2	0.133469	0.133469	NE				GL22166-R2	0.257846	0.257846	NE
GL23324-R1	0.133469	0.133469	NE				GL23324-R1	0.257846	0.257846	NE
GL21887-R1	0.133469	0.133469	NE				GL21887-R1	0.257846	0.257846	NE
GL23356-R1	0.133469	0.133469	NE				GL23356-R1	0.257846	0.257846	NE
GL25661-R1	0.133469	0.0497413	NE				GL25661-R1	0.257846	0	E
GL24759-R1	0.133469	0.0497413	NE				GL24759-R1	0.257846	0	E
GL24922-R1	0.133469	0.133469	NE				GL24922-R1	0.257846	0.257846	NE
GL16711-R1	0.133469	0.133469	NE				GL16711-R1	0.257846	0.257846	NE
GL24584-R1	0.133469	0.133469	NE				GL24584-R1	0.257846	0.257846	NE
GL24584-R2	0.133469	0.133469	NE				GL24584-R2	0.257846	0.257846	NE
GL21047-R1	0.133469	0.133469	NE				GL21047-R1	0.257846	0.257846	NE
GL27016-R1	0.133469	0.130673	NE				GL27016-R1	0.257846	0.241344	NE
GL31671-R1	0.133469	0.133469	NE				GL31671-R1	0.257846	0.257846	NE
GL22603-R1	0.133469	0.133469	NE				GL22603-R1	0.257846	0.257846	NE
GL26078-R1	0.133469	0.133469	NE				GL26078-R1	0.257846	0.257846	NE
GL30690-R1	0.133469	0.133469	NE				GL30690-R1	0.257846	0.257846	NE
GL22816-R1	0.133469	0.133469	NE				GL22816-R1	0.257846	0.257846	NE
GL24708-R1	0.133469	0.133469	NE				GL24708-R1	0.257846	0.257846	NE
GL19812-R1	0.133469	0.133469	NE				GL19812-R1	0.257846	0.257846	NE
GL24637-R1	0.133469	0.133469	NE				GL24637-R1	0.257846	0.257846	NE
GL25162-R1	0.133469	0.133469	NE				GL25162-R1	0.257846	0.257846	NE
GL28776-R1	0.133469	0.133469	NE				GL28776-R1	0.257846	0.257846	NE
GL30390-R1	0.133469	0	E				GL30390-R1	0.257846	0	E
GL29878-R1	0.133469	0.133469	NE				GL29878-R1	0.257846	0.257846	NE
GL20523-R1	0.133469	0.133469	NE				GL20523-R1	0.257846	0.257846	NE
GL20523-R2	0.133469	0.133469	NE				GL20523-R2	0.257846	0.257846	NE
GL31180-R1	0.133469	0.133469	NE				GL31180-R1	0.257846	0.257846	NE
GL20891-R1	0.133469	0.133469	NE				GL20891-R1	0.257846	0.257846	NE
GL31401-R1	0.133469	0.133469	NE				GL31401-R1	0.257846	0.257846	NE
GL20551-R1	0.133469	0.133469	NE				GL20551-R1	0.257846	0.257846	NE
GL27720-R1	0.133469	0.133463	NE				GL27720-R1	0.257846	0.257808	NE
GL22711-R1	0.133469	0	E				GL22711-R1	0.257846	0	E
GL19823-R1	0.133469	0.133469	NE				GL19823-R1	0.257846	0.257846	NE
GL17170-R1	0.133469	0.133469	NE				GL17170-R1	0.257846	0.257846	NE
GL28567-R1	0.133469	0.133469	NE				GL28567-R1	0.257846	0.257846	NE
GL17430-R1	0.133469	0	E				GL17430-R1	0.257846	0	E
GL19776-R1	0.133469	0.133469	NE				GL19776-R1	0.257846	0.257846	NE
GL28502-R1	0.133469	0.133469	NE				GL28502-R1	0.257846	0.257846	NE
GL24851-R1	0.133469	0.133469	NE				GL24851-R1	0.257846	0.257846	NE
GL30239-R1	0.133469	0.133469	NE				GL30239-R1	0.257846	0.257846	NE
GL20990-R1	0.133469	0.133469	NE				GL20990-R1	0.257846	0.257846	NE
GL17190-R1	0.133469	0.133469	NE				GL17190-R1	0.257846	0.257846	NE
GL24415-R1	0.133469	0.133469	NE				GL24415-R1	0.257846	0.257846	NE
GL17288-R1	0.133469	0.133469	NE				GL17288-R1	0.257846	0.257846	NE
GL31664-R1	0.133469	0.133469	NE				GL31664-R1	0.257846	0.257846	NE
GL31665-R1	0.133469	0.133469	NE				GL31665-R1	0.257846	0.257846	NE
GL24849-R1	0.133469	0.0891424	NE				GL24849-R1	0.257846	0	E
GL22628-R1	0.133469	0	E				GL22628-R1	0.257846	0	E
GL24603-R1	0.133469	0.133469	NE				GL24603-R1	0.257846	0.257846	NE
GL31204-R1	0.133469	0.133469	NE				GL31204-R1	0.257846	0.257846	NE
GL24804-R1	0.133469	-1.17227e-13	E				GL24804-R1	0.257846	0	E
GL29631-R1	0.133469	0.0891424	NE				GL29631-R1	0.257846	0	E
GL28557-R1	0.133469	0.124735	NE				GL28557-R1	0.257846	0.257846	NE
GL21533-R1	0.133469	0.133469	NE				GL21533-R1	0.257846	0.257846	NE
GL25578-R1	0.133469	0.133469	NE				GL25578-R1	0.257846	0.257846	NE
GL23796-R1	0.133469	0.133469	NE				GL23796-R1	0.257846	0.257846	NE
GL23438-R1	0.133469	0.133469	NE				GL23438-R1	0.257846	0.257846	NE
GL20271-R1	0.133469	0.133469	NE				GL20271-R1	0.257846	0.257846	NE
GL24625-R1	0.133469	0.133469	NE				GL24625-R1	0.257846	0.257846	NE
GL29711-R1	0.133469	0.131676	NE				GL29711-R1	0.257846	0.248779	NE
GL22246-R1	0.133469	0.133469	NE				GL22246-R1	0.257846	0.257846	NE
GL27396-R1	0.133469	0.133469	NE				GL27396-R1	0.257846	0.257846	NE
GL22112-R1	0.133469	0.133469	NE				GL22112-R1	0.257846	0.257846	NE
GL24057-R1	0.133469	0.133469	NE				GL24057-R1	0.257846	0.257846	NE
GL30084-R1	0.133469	0.133469	NE				GL30084-R1	0.257846	0.257846	NE
GL30084-R2	0.133469	0.133469	NE				GL30084-R2	0.257846	0.257846	NE
GL30084-R3	0.133469	0.133469	NE				GL30084-R3	0.257846	0.257846	NE
GL29724-R1	0.133469	0.133469	NE				GL29724-R1	0.257846	0.257846	NE
GL22957-R1	0.133469	0.133469	NE				GL22957-R1	0.257846	0.257846	NE
GL30993-R1	0.133469	0.133469	NE				GL30993-R1	0.257846	0.257846	NE
GL28298-R1	0.133469	0.131865	NE				GL28298-R1	0.257846	0.249144	NE
GL20401-R1	0.133469	0.133469	NE				GL20401-R1	0.257846	0.257846	NE
GL21921-R1	0.133469	0.1324	NE				GL21921-R1	0.257846	0.252395	NE
GL24824-R1	0.133469	0.131676	NE				GL24824-R1	0.257846	0.248779	NE
GL15607-R1	0.133469	0.133469	NE				GL15607-R1	0.257846	0.257846	NE
GL29655-R1	0.133469	0.133469	NE				GL29655-R1	0.257846	0.257846	NE
GL30477-R1	0.133469	0.133311	NE				GL30477-R1	0.257846	0.257456	NE
GL24792-R1	0.133469	0.133205	NE				GL24792-R1	0.257846	0.255525	NE
GL15154-R1	0.133469	0.133469	NE				GL15154-R1	0.257846	0.257846	NE
GL20896-R1	0.133469	0.133469	NE				GL20896-R1	0.257846	0.257846	NE
GL26683-R1	0.133469	0.133469	NE				GL26683-R1	0.257846	0.257846	NE
GL26682-R1	0.133469	0.133469	NE				GL26682-R1	0.257846	0.257846	NE
GL17594-R1	0.133469	0.133469	NE				GL17594-R1	0.257846	0.257846	NE
GL22515-R1	0.133469	0.133469	NE				GL22515-R1	0.257846	0.257846	NE
GL16081-R1	0.133469	0.133469	NE				GL16081-R1	0.257846	0.257846	NE
GL25035-R1	0.133469	0.133469	NE				GL25035-R1	0.257846	0.257846	NE
GL25365-R1	0.133469	0.133469	NE				GL25365-R1	0.257846	0.257846	NE
GL20240-R1	0.133469	0.133469	NE				GL20240-R1	0.257846	0.257846	NE
GL31683-R1	0.133469	0.133469	NE				GL31683-R1	0.257846	0.257846	NE
GL26667-R1	0.133469	0.133469	NE				GL26667-R1	0.257846	0.257846	NE
GL16715-R1	0.133469	0.133469	NE				GL16715-R1	0.257846	0.257846	NE
GL17604-R1	0.133469	0.133469	NE				GL17604-R1	0.257846	0.257846	NE
GL27621-R1	0.133469	0.133469	NE				GL27621-R1	0.257846	0.257846	NE
GL31606-R1	0.133469	0.133469	NE				GL31606-R1	0.257846	0.257846	NE
GL23034-R1	0.133469	0.133469	NE				GL23034-R1	0.257846	0.257846	NE
GL23038-R1	0.133469	0.133469	NE				GL23038-R1	0.257846	0.257846	NE
GL22548-R1	0.133469	0.133469	NE				GL22548-R1	0.257846	0.257846	NE
GL24644-R1	0.133469	0.133469	NE				GL24644-R1	0.257846	0.257846	NE
GL24771-R1	0.133469	0.133469	NE				GL24771-R1	0.257846	0.257846	NE
GL31258-R1	0.133469	0.133469	NE				GL31258-R1	0.257846	0.257846	NE
GL20994-R1	0.133469	0.133469	NE				GL20994-R1	0.257846	0.257846	NE
GL24115-R1	0.133469	0.133469	NE				GL24115-R1	0.257846	0.257846	NE
GL30208-R1	0.133469	0	E				GL30208-R1	0.257846	0	E
GL21781-R1	0.133469	0.133429	NE				GL21781-R1	0.257846	0.257616	NE
GL22139-R1	0.133469	0.133429	NE				GL22139-R1	0.257846	0.257616	NE
GL17879-R1	0.133469	0.133469	NE				GL17879-R1	0.257846	0.257846	NE
GL25255-R1	0.133469	0.133469	NE				GL25255-R1	0.257846	0.257846	NE
GL25255-R2	0.133469	0.133469	NE				GL25255-R2	0.257846	0.257846	NE
GL31360-R1	0.133469	0.0542241	NE				GL31360-R1	0.257846	0	E
GL25971-R1	0.133469	0.0497413	NE				GL25971-R1	0.257846	0	E
GL29910-R1	0.133469	0.133469	NE				GL29910-R1	0.257846	0.257846	NE
GL18545-R1	0.133469	0.133439	NE				GL18545-R1	0.257846	0.25771	NE
GL26795-R1	0.133469	0.0542241	NE				GL26795-R1	0.257846	0	E
GL19372-R1	0.133469	0.133469	NE				GL19372-R1	0.257846	0.257846	NE
GL23768-R1	0.133469	0.133469	NE				GL23768-R1	0.257846	0.257846	NE
GL30044-R1	0.133469	0.133469	NE				GL30044-R1	0.257846	0.257846	NE
GL26572-R1	0.133469	0.133469	NE				GL26572-R1	0.257846	0.257846	NE
GL18415-R1	0.133469	0.133469	NE				GL18415-R1	0.257846	0.257846	NE
GL27033-R1	0.133469	0.133469	NE				GL27033-R1	0.257846	0.257846	NE
GL17247-R1	0.133469	0	E				GL17247-R1	0.257846	0	E
GL25070-R1	0.133469	0	E				GL25070-R1	0.257846	0	E
GL30409-R1	0.133469	0	E				GL30409-R1	0.257846	0	E
GL19834-R1	0.133469	0	E				GL19834-R1	0.257846	0	E
GL26706-R1	0.133469	0.133469	NE				GL26706-R1	0.257846	0.257846	NE
GL30546-R1	0.133469	0.133469	NE				GL30546-R1	0.257846	0.257846	NE
GL24616-R1	0.133469	0.133469	NE				GL24616-R1	0.257846	0.257846	NE
GL20416-R1	0.133469	0	E				GL20416-R1	0.257846	0	E
GL26714-R1	0.133469	0	E				GL26714-R1	0.257846	0	E
GL30148-R1	0.133469	0	E				GL30148-R1	0.257846	0	E
GL26488-R1	0.133469	0.133469	NE				GL26488-R1	0.257846	0.257846	NE
GL26488-R2	0.133469	0.133469	NE				GL26488-R2	0.257846	0.257846	NE
GL24047-R1	0.133469	0.133455	NE				GL24047-R1	0.257846	0.257804	NE
GL24439-R1	0.133469	0.133469	NE				GL24439-R1	0.257846	0.257846	NE
GL22111-R1	0.133469	0.0793714	NE				GL22111-R1	0.257846	0	E
GL30911-R1	0.133469	0.0793714	NE				GL30911-R1	0.257846	0	E
GL16639-R1	0.133469	0.133469	NE				GL16639-R1	0.257846	0.257846	NE
GL25327-R1	0.133469	0.133469	NE				GL25327-R1	0.257846	0.257846	NE
GL18527-R1	0.133469	0.0793714	NE				GL18527-R1	0.257846	0	E
GL21258-R1	0.133469	0.133469	NE				GL21258-R1	0.257846	0.257846	NE
GL21848-R1	0.133469	0.133469	NE				GL21848-R1	0.257846	0.257846	NE
GL31395-R1	0.133469	0.133469	NE				GL31395-R1	0.257846	0.257846	NE
GL29819-R1	0.133469	0.133469	NE				GL29819-R1	0.257846	0.257846	NE
GL29632-R1	0.133469	0.133469	NE				GL29632-R1	0.257846	0.257846	NE
GL28545-R1	0.133469	0.133469	NE				GL28545-R1	0.257846	0.257846	NE
GL22585-R1	0.133469	0.133469	NE				GL22585-R1	0.257846	0.257846	NE
GL24986-R1	0.133469	0.0891424	NE				GL24986-R1	0.257846	0	E
GL21955-R1	0.133469	0.133469	NE				GL21955-R1	0.257846	0.257846	NE
GL30332-R1	0.133469	0.133469	NE				GL30332-R1	0.257846	0.257846	NE
GL30835-R1	0.133469	0.133469	NE				GL30835-R1	0.257846	0.257846	NE
GL26704-R1	0.133469	0.133469	NE				GL26704-R1	0.257846	0.257846	NE
GL15529-R1	0.133469	0.133469	NE				GL15529-R1	0.257846	0.257846	NE
GL22882-R1	0.133469	0.133469	NE				GL22882-R1	0.257846	0.257846	NE
GL25823-R1	0.133469	0.133469	NE				GL25823-R1	0.257846	0.257846	NE
GL29836-R2	0.133469	0.133469	NE				GL29836-R2	0.257846	0.257846	NE
GL29836-R1	0.133469	0.133469	NE				GL29836-R1	0.257846	0.257846	NE
GL28626-R1	0.133469	0.133469	NE				GL28626-R1	0.257846	0.257846	NE
GL24613-R1	0.133469	0.133469	NE				GL24613-R1	0.257846	0.257846	NE
GL25071-R1	0.133469	0.133469	NE				GL25071-R1	0.257846	0.257846	NE
GL30578-R1	0.133469	0.133469	NE				GL30578-R1	0.257846	0.257846	NE
GL17083-R1	0.133469	0.133469	NE				GL17083-R1	0.257846	0.257846	NE
GL17796-R1	0.133469	0.133469	NE				GL17796-R1	0.257846	0.257846	NE
GL19337-R1	0.133469	0.133469	NE				GL19337-R1	0.257846	0.257846	NE
GL17612-R1	0.133469	0.133469	NE				GL17612-R1	0.257846	0.257846	NE
GL31286-R1	0.133469	0.133469	NE				GL31286-R1	0.257846	0.257846	NE
GL30373-R0	0.133469	0.133469	NE				GL30373-R0	0.257846	0.257846	NE
GL30373-R1	0.133469	0.133469	NE				GL30373-R1	0.257846	0.257846	NE
GL24642-R1	0.133469	0.133469	NE				GL24642-R1	0.257846	0.257846	NE
GL17006-R1	0.133469	0.133469	NE				GL17006-R1	0.257846	0.257846	NE
GL21425-R1	0.133469	0.133469	NE				GL21425-R1	0.257846	0.257846	NE
GL21006-R1	0.133469	0.133469	NE				GL21006-R1	0.257846	0.257846	NE
GL30576-R1	0.133469	0.133469	NE				GL30576-R1	0.257846	0.257846	NE
GL24572-R1	0.133469	0.133469	NE				GL24572-R1	0.257846	0.257846	NE
GL31316-R1	0.133469	0.133469	NE				GL31316-R1	0.257846	0.257846	NE
GL25922-R1	0.133469	0.132576	NE				GL25922-R1	0.257846	0.245697	NE
GL24913-R1	0.133469	0.133469	NE				GL24913-R1	0.257846	0.257846	NE
GL25440-R1	0.133469	0.133469	NE				GL25440-R1	0.257846	0.257846	NE
GL28133-R1	0.133469	0.133469	NE				GL28133-R1	0.257846	0.257846	NE
GL20661-R1	0.133469	0.132576	NE				GL20661-R1	0.257846	0.245697	NE
GL19075-R1	0.133469	0.133469	NE				GL19075-R1	0.257846	0.257846	NE
GL30111-R1	0.133469	0.133469	NE				GL30111-R1	0.257846	0.257846	NE
GL22645-R1	0.133469	0.132576	NE				GL22645-R1	0.257846	0.245697	NE
GL29633-R1	0.133469	0.133469	NE				GL29633-R1	0.257846	0.257846	NE
GL29700-R1	0.133469	0.133469	NE				GL29700-R1	0.257846	0.257846	NE
GL15699-R1	0.133469	0.133469	NE				GL15699-R1	0.257846	0.257846	NE
GL30541-R1	0.133469	0.133469	NE				GL30541-R1	0.257846	0.257846	NE
GL18499-R1	0.133469	0.133469	NE				GL18499-R1	0.257846	0.257846	NE
GL29483-R1	0.133469	0.133469	NE				GL29483-R1	0.257846	0.257846	NE
GL21231-R1	0.133469	0.133469	NE				GL21231-R1	0.257846	0.257846	NE
GL21534-R1	0.133469	0.133469	NE				GL21534-R1	0.257846	0.257846	NE
GL17042-R1	0.133469	0.133469	NE				GL17042-R1	0.257846	0.257846	NE
GL24710-R1	0.133469	0.133469	NE				GL24710-R1	0.257846	0.257846	NE
GL21166-R1	0.133469	-1.41103e-13	E				GL21166-R1	0.257846	0	E
GL19819-R1	0.133469	-1.41103e-13	E				GL19819-R1	0.257846	0	E
GL22262-R1	0.133469	0.133469	NE				GL22262-R1	0.257846	0.257846	NE
GL20270-R1	0.133469	0.133469	NE				GL20270-R1	0.257846	0.257846	NE
GL25884-R1	0.133469	0.133469	NE				GL25884-R1	0.257846	0.257846	NE
GL22580-R1	0.133469	0.133469	NE				GL22580-R1	0.257846	0.257846	NE
GL31615-R1	0.133469	0.133469	NE				GL31615-R1	0.257846	0.257846	NE
GL28558-R1	0.133469	2.91531e-13	E				GL28558-R1	0.257846	0	E
GL21175-R1	0.133469	0.133469	NE				GL21175-R1	0.257846	0.257846	NE
GL24493-R1	0.133469	0.132908	NE				GL24493-R1	0.257846	0.249276	NE
GL19278-R1	0.133469	0.133205	NE				GL19278-R1	0.257846	0.255525	NE
GL23742-R1	0.133469	0.133469	NE				GL23742-R1	0.257846	0.257846	NE
GL25047-R1	0.133469	0.133469	NE				GL25047-R1	0.257846	0.257846	NE
GL21361-R1	0.133469	0.133469	NE				GL21361-R1	0.257846	0.257846	NE
GL16921-R1	0.133469	0.132191	NE				GL16921-R1	0.257846	0.246671	NE
GL20235-R1	0.133469	0.133469	NE				GL20235-R1	0.257846	0.257846	NE
GL25289-R1	0.133469	0.133469	NE				GL25289-R1	0.257846	0.257846	NE
GL30664-R1	0.133469	0.107204	NE				GL30664-R1	0.257846	0.257126	NE
GL30403-R1	0.133469	0.133469	NE				GL30403-R1	0.257846	0.257846	NE
GL20695-R1	0.133469	0.133469	NE				GL20695-R1	0.257846	0.257846	NE
GL24381-R1	0.133469	0	E				GL24381-R1	0.257846	0	E
GL25330-R1	0.133469	0.133469	NE				GL25330-R1	0.257846	0.257846	NE
GL31652-R1	0.133469	0.133469	NE				GL31652-R1	0.257846	0.257846	NE
GL26011-R1	0.133469	0.133469	NE				GL26011-R1	0.257846	0.257846	NE
GL19459-R1	0.133469	0.133469	NE				GL19459-R1	0.257846	0.257846	NE
GL31662-R1	0.133469	0.133469	NE				GL31662-R1	0.257846	0.257846	NE
GL19205-R1	0.133469	0.133469	NE				GL19205-R1	0.257846	0.257846	NE
GL18875-R1	0.133469	0.133469	NE				GL18875-R1	0.257846	0.257846	NE
GL25146-R1	0.133469	0.133469	NE				GL25146-R1	0.257846	0.257846	NE
GL19810-R1	0.133469	0.133469	NE				GL19810-R1	0.257846	0.257846	NE
GL25117-R1	0.133469	0.133469	NE				GL25117-R1	0.257846	0.257846	NE
GL25817-R1	0.133469	0.133469	NE				GL25817-R1	0.257846	0.257846	NE
GL16739-R1	0.133469	0.133469	NE				GL16739-R1	0.257846	0.257846	NE
GL28124-R1	0.133469	0.133469	NE				GL28124-R1	0.257846	0.257846	NE
GL26599-R1	0.133469	0.133469	NE				GL26599-R1	0.257846	0.257846	NE
GL30079-R1	0.133469	0.133469	NE				GL30079-R1	0.257846	0.257846	NE
GL16746-R1	0.133469	0.133469	NE				GL16746-R1	0.257846	0.257846	NE
GL16156-R1	0.133469	0.133469	NE				GL16156-R1	0.257846	0.257846	NE
GL25873-R1	0.133469	0.133469	NE				GL25873-R1	0.257846	0.257846	NE
GL16582-R1	0.133469	0.133469	NE				GL16582-R1	0.257846	0.257846	NE
GL25575-R1	0.133469	0.133469	NE				GL25575-R1	0.257846	0.257846	NE
GL16738-R1	0.133469	0.133469	NE				GL16738-R1	0.257846	0.257846	NE
GL24307-R1	0.133469	0.133469	NE				GL24307-R1	0.257846	0.257846	NE
GL27245-R1	0.133469	0.133469	NE				GL27245-R1	0.257846	0.257846	NE
GL25112-R1	0.133469	0.133469	NE				GL25112-R1	0.257846	0.257846	NE
GL18625-R1	0.133469	0.133469	NE				GL18625-R1	0.257846	0.257846	NE
GL23543-R1	0.133469	0.133469	NE				GL23543-R1	0.257846	0.257846	NE
GL23507-R1	0.133469	0.133469	NE				GL23507-R1	0.257846	0.257846	NE
GL22863-R1	0.133469	0.133469	NE				GL22863-R1	0.257846	0.257846	NE
GL25996-R1	0.133469	0.133469	NE				GL25996-R1	0.257846	0.257846	NE
GL30295-R1	0.133469	0.133469	NE				GL30295-R1	0.257846	0.257846	NE
GL25353-R1	0.133469	0.133469	NE				GL25353-R1	0.257846	0.257846	NE
GL29833-R1	0.133469	0.133469	NE				GL29833-R1	0.257846	0.257846	NE
GL20925-R1	0.133469	0.133469	NE				GL20925-R1	0.257846	0.257846	NE
GL15303-R1	0.133469	0.133469	NE				GL15303-R1	0.257846	0.257846	NE
GL30453-R1	0.133469	0.133469	NE				GL30453-R1	0.257846	0.257846	NE
GL21922-R1	0.133469	0.133469	NE				GL21922-R1	0.257846	0.257846	NE
GL16501-R1	0.133469	0.133469	NE				GL16501-R1	0.257846	0.257846	NE
GL23148-R1	0.133469	0.133469	NE				GL23148-R1	0.257846	0.257846	NE
GL21066-R1	0.133469	0.133469	NE				GL21066-R1	0.257846	0.257846	NE
GL26604-R1	0.133469	0.133469	NE				GL26604-R1	0.257846	0.257846	NE
GL23962-R1	0.133469	0.123863	NE				GL23962-R1	0.257846	0.193392	NE
GL23456-R1	0.133469	0.133469	NE				GL23456-R1	0.257846	0.257846	NE
GL25066-R1	0.133469	0.133469	NE				GL25066-R1	0.257846	0.257846	NE
GL19526-R1	0.133469	0.133469	NE				GL19526-R1	0.257846	0.257846	NE
GL20687-R1	0.133469	0.133469	NE				GL20687-R1	0.257846	0.257846	NE
GL24199-R1	0.133469	0.133469	NE				GL24199-R1	0.257846	0.257846	NE
GL17184-R1	0.133469	0.133469	NE				GL17184-R1	0.257846	0.257846	NE
GL19267-R1	0.133469	0.133469	NE				GL19267-R1	0.257846	0.257846	NE
GL25695-R1	0.133469	0.133469	NE				GL25695-R1	0.257846	0.257846	NE
GL27193-R1	0.133469	0.133469	NE				GL27193-R1	0.257846	0.257846	NE
GL15802-R1	0.133469	0.133469	NE				GL15802-R1	0.257846	0.257846	NE
GL23447-R1	0.133469	0.133469	NE				GL23447-R1	0.257846	0.257846	NE
GL30602-R1	0.133469	0.133469	NE				GL30602-R1	0.257846	0.257846	NE
GL18562-R1	0.133469	0.133469	NE				GL18562-R1	0.257846	0.257846	NE
GL23886-R1	0.133469	0.133469	NE				GL23886-R1	0.257846	0.257846	NE
GL21014-R1	0.133469	0.133469	NE				GL21014-R1	0.257846	0.257846	NE
GL30051-R1	0.133469	0.133469	NE				GL30051-R1	0.257846	0.257846	NE
GL29889-R2	0.133469	0.133469	NE				GL29889-R2	0.257846	0.257846	NE
GL16847-R1	0.133469	0.133469	NE				GL16847-R1	0.257846	0.257846	NE
GL22430-R1	0.133469	0.133469	NE				GL22430-R1	0.257846	0.257846	NE
GL22430-R2	0.133469	0.133469	NE				GL22430-R2	0.257846	0.257846	NE
GL30555-R1	0.133469	0.133469	NE				GL30555-R1	0.257846	0.257846	NE
GL17543-R1	0.133469	0.133469	NE				GL17543-R1	0.257846	0.257846	NE
GL31498-R1	0.133469	0.133469	NE				GL31498-R1	0.257846	0.257846	NE
GL16611-R1	0.133469	0.133469	NE				GL16611-R1	0.257846	0.257846	NE
GL15140-R1	0.133469	0.133469	NE				GL15140-R1	0.257846	0.257846	NE
GL21120-R1	0.133469	0.133469	NE				GL21120-R1	0.257846	0.257846	NE
GL26570-R1	0.133469	0.133469	NE				GL26570-R1	0.257846	0.257846	NE
GL29945-R1	0.133469	0.133469	NE				GL29945-R1	0.257846	0.257846	NE
GL18577-R1	0.133469	0.133469	NE				GL18577-R1	0.257846	0.257846	NE
GL31192-R1	0.133469	0.133469	NE				GL31192-R1	0.257846	0.257846	NE
GL23611-R1	0.133469	0.133469	NE				GL23611-R1	0.257846	0.257846	NE
GL30670-R1	0.133469	0.133469	NE				GL30670-R1	0.257846	0.257846	NE
GL29712-R1	0.133469	0.133469	NE				GL29712-R1	0.257846	0.257846	NE
GL31637-R1	0.133469	0.133469	NE				GL31637-R1	0.257846	0.257846	NE
GL28745-R1	0.133469	0.133469	NE				GL28745-R1	0.257846	0.257846	NE
GL25988-R1	0.133469	0.133469	NE				GL25988-R1	0.257846	0.257846	NE
GL31505-R1	0.133469	0.133469	NE				GL31505-R1	0.257846	0.257846	NE
GL29011-R1	0.133469	0.133469	NE				GL29011-R1	0.257846	0.257846	NE
GL24640-R1	0.133469	0.133469	NE				GL24640-R1	0.257846	0.257846	NE
GL29524-R1	0.133469	0.133469	NE				GL29524-R1	0.257846	0.257846	NE
GL26015-R1	0.133469	0.133469	NE				GL26015-R1	0.257846	0.257846	NE
GL17918-R1	0.133469	0.133469	NE				GL17918-R1	0.257846	0.257846	NE
GL27344-R1	0.133469	0.133469	NE				GL27344-R1	0.257846	0.257846	NE
GL31242-R1	0.133469	0.133469	NE				GL31242-R1	0.257846	0.257846	NE
GL26658-R1	0.133469	0.133469	NE				GL26658-R1	0.257846	0.257846	NE
GL26113-R1	0.133469	0.133469	NE				GL26113-R1	0.257846	0.257846	NE
GL26573-R1	0.133469	0.133469	NE				GL26573-R1	0.257846	0.257846	NE
GL22841-R1	0.133469	0.133469	NE				GL22841-R1	0.257846	0.257846	NE
GL30348-R1	0.133469	0.0050008	NE				GL30348-R1	0.257846	0	E
GL30508-R1	0.133469	0.133469	NE				GL30508-R1	0.257846	0.257846	NE
GL25555-R1	0.133469	0.133469	NE				GL25555-R1	0.257846	0.257846	NE
GL22885-R1	0.133469	0.133469	NE				GL22885-R1	0.257846	0.257846	NE
GL23954-R1	0.133469	0.133469	NE				GL23954-R1	0.257846	0.257846	NE
GL29904-R1	0.133469	0.133469	NE				GL29904-R1	0.257846	0.257846	NE
GL17240-R1	0.133469	0.133469	NE				GL17240-R1	0.257846	0.257846	NE
GL18879-R1	0.133469	0.133469	NE				GL18879-R1	0.257846	0.257846	NE
GL30203-R1	0.133469	0.133469	NE				GL30203-R1	0.257846	0.257846	NE
GL21707-R1	0.133469	0.133469	NE				GL21707-R1	0.257846	0.257846	NE
GL22792-R1	0.133469	0.133469	NE				GL22792-R1	0.257846	0.257846	NE
GL22792-R2	0.133469	0.133469	NE				GL22792-R2	0.257846	0.257846	NE
GL17179-R1	0.133469	0.133469	NE				GL17179-R1	0.257846	0.257846	NE
GL23743-R1	0.133469	0.133469	NE				GL23743-R1	0.257846	0.257846	NE
GL23743-R2	0.133469	0.133469	NE				GL23743-R2	0.257846	0.257846	NE
GL25218-R1	0.133469	0.133469	NE				GL25218-R1	0.257846	0.257846	NE
GL23948-R1	0.133469	0.133469	NE				GL23948-R1	0.257846	0.257846	NE
GL18722-R1	0.133469	0.133469	NE				GL18722-R1	0.257846	0.257846	NE
GL24652-R1	0.133469	0.133469	NE				GL24652-R1	0.257846	0.257846	NE
GL15031-R1	0.133469	0.133469	NE				GL15031-R1	0.257846	0.257846	NE
GL25272-R1	0.133469	0.133469	NE				GL25272-R1	0.257846	0.257846	NE
GL24639-R1	0.133469	0.133469	NE				GL24639-R1	0.257846	0.257846	NE
GL27822-R1	0.133469	0.133469	NE				GL27822-R1	0.257846	0.257846	NE
GL22966-R1	0.133469	0.133469	NE				GL22966-R1	0.257846	0.257846	NE
GL26651-R1	0.133469	0.133469	NE				GL26651-R1	0.257846	0.257846	NE
GL30055-R1	0.133469	0.133469	NE				GL30055-R1	0.257846	0.257846	NE
GL24128-R1	0.133469	0.133469	NE				GL24128-R1	0.257846	0.257846	NE
GL24317-R1	0.133469	0.133469	NE				GL24317-R1	0.257846	0.257846	NE
GL16114-R1	0.133469	0.133469	NE				GL16114-R1	0.257846	0.257846	NE
GL19790-R1	0.133469	0.133469	NE				GL19790-R1	0.257846	0.257846	NE
GL22533-R1	0.133469	0.133469	NE				GL22533-R1	0.257846	0.257846	NE
GL17761-R1	0.133469	0.133469	NE				GL17761-R1	0.257846	0.257846	NE
GL18144-R1	0.133469	0.133469	NE				GL18144-R1	0.257846	0.257846	NE
GL21354-R1	0.133469	0.133469	NE				GL21354-R1	0.257846	0.257846	NE
GL29181-R1	0.133469	0.133469	NE				GL29181-R1	0.257846	0.257846	NE
GL15754-R1	0.133469	0.133444	NE				GL15754-R1	0.257846	0.257701	NE
GL22281-R1	0.133469	0.133469	NE				GL22281-R1	0.257846	0.257846	NE
GL29837-R1	0.133469	0.133469	NE				GL29837-R1	0.257846	0.257846	NE
GL23170-R1	0.133469	0.133469	NE				GL23170-R1	0.257846	0.257846	NE
GL29865-R1	0.133469	0.133469	NE				GL29865-R1	0.257846	0.257846	NE
GL26068-R1	0.133469	0.133469	NE				GL26068-R1	0.257846	0.257846	NE
GL20411-R1	0.133469	0.133469	NE				GL20411-R1	0.257846	0.257846	NE
GL18754-R1	0.133469	0.133469	NE				GL18754-R1	0.257846	0.257846	NE
GL19627-R1	0.133469	0.133469	NE				GL19627-R1	0.257846	0.257846	NE
GL23629-R1	0.133469	0.133469	NE				GL23629-R1	0.257846	0.257846	NE
GL23860-R1	0.133469	0.133469	NE				GL23860-R1	0.257846	0.257846	NE
GL31190-R1	0.133469	0.133469	NE				GL31190-R1	0.257846	0.257846	NE
GL25317-R1	0.133469	0.133469	NE				GL25317-R1	0.257846	0.257846	NE
GL24144-R1	0.133469	0.133469	NE				GL24144-R1	0.257846	0.257846	NE
GL23129-R1	0.133469	0.133469	NE				GL23129-R1	0.257846	0.257846	NE
GL16697-R1	0.133469	0	E				GL16697-R1	0.257846	0	E
GL29731-R1	0.133469	0	E				GL29731-R1	0.257846	0	E
GL16005-R1	0.133469	0	E				GL16005-R1	0.257846	0	E
GL18703-R1	0.133469	0.133469	NE				GL18703-R1	0.257846	0.257846	NE
GL15683-R1	0.133469	0.133469	NE				GL15683-R1	0.257846	0.257846	NE
GL18178-R1	0.133469	0.133469	NE				GL18178-R1	0.257846	0.257846	NE
GL15686-R1	0.133469	0	E				GL15686-R1	0.257846	0	E
GL25036-R1	0.133469	0.133469	NE				GL25036-R1	0.257846	0.257846	NE
GL25287-R1	0.133469	0.133469	NE				GL25287-R1	0.257846	0.257846	NE
GL18424-R1	0.133469	0.133469	NE				GL18424-R1	0.257846	0.257846	NE
GL20729-R1	0.133469	0.133469	NE				GL20729-R1	0.257846	0.257846	NE
GL18724-R1	0.133469	0	E				GL18724-R1	0.257846	0	E
GL23790-R1	0.133469	0	E				GL23790-R1	0.257846	0	E
GL31337-R1	0.133469	0.133469	NE				GL31337-R1	0.257846	0.257846	NE
GL31604-R1	0.133469	0.133469	NE				GL31604-R1	0.257846	0.257846	NE
GL20473-R1	0.133469	0.133468	NE				GL20473-R1	0.257846	0.257842	NE
GL24872-R1	0.133469	0.133469	NE				GL24872-R1	0.257846	0.257846	NE
GL23976-R1	0.133469	0.133469	NE				GL23976-R1	0.257846	0.257846	NE
GL17919-R1	0.133469	0	E				GL17919-R1	0.257846	0	E
GL26666-R1	0.133469	0	E				GL26666-R1	0.257846	0	E
GL23651-R1	0.133469	0.133469	NE				GL23651-R1	0.257846	0.257846	NE
GL30808-R1	0.133469	0.133467	NE				GL30808-R1	0.257846	0.257834	NE
GL24508-R1	0.133469	0.133469	NE				GL24508-R1	0.257846	0.257846	NE
GL24512-R1	0.133469	0.133469	NE				GL24512-R1	0.257846	0.257846	NE
GL22880-R1	0.133469	0.133469	NE				GL22880-R1	0.257846	0.257846	NE
GL30224-R1	0.133469	0.133469	NE				GL30224-R1	0.257846	0.257846	NE
GL19805-R1	0.133469	0.133469	NE				GL19805-R1	0.257846	0.257846	NE
GL23350-R1	0.133469	0.133469	NE				GL23350-R1	0.257846	0.257846	NE
GL30346-R1	0.133469	0.133469	NE				GL30346-R1	0.257846	0.257846	NE
GL24291-R1	0.133469	0.133469	NE				GL24291-R1	0.257846	0.257846	NE
GL25254-R1	0.133469	0.133469	NE				GL25254-R1	0.257846	0.257846	NE
GL30211-R1	0.133469	0.133469	NE				GL30211-R1	0.257846	0.257846	NE
GL23397-R1	0.133469	0.133469	NE				GL23397-R1	0.257846	0.257846	NE
GL15482-R1	0.133469	0.133469	NE				GL15482-R1	0.257846	0.257846	NE
GL31211-R1	0.133469	0	E				GL31211-R1	0.257846	0	E
GL30432-R1	0.133469	0	E				GL30432-R1	0.257846	0	E
GL16722-R1	0.133469	0.133469	NE				GL16722-R1	0.257846	0.257846	NE
GL24054-R1	0.133469	0	E				GL24054-R1	0.257846	0	E
GL31659-R1	0.133469	0	E				GL31659-R1	0.257846	0	E
GL26017-R1	0.133469	0.133469	NE				GL26017-R1	0.257846	0.257846	NE
GL29934-R1	0.133469	0.133469	NE				GL29934-R1	0.257846	0.257846	NE
GL31141-R1	0.133469	0.133469	NE				GL31141-R1	0.257846	0.257846	NE
GL26745-R1	0.133469	0.133469	NE				GL26745-R1	0.257846	0.257846	NE
GL24308-R1	0.133469	0.133469	NE				GL24308-R1	0.257846	0.257846	NE
GL30928-R1	0.133469	0.133469	NE				GL30928-R1	0.257846	0.257846	NE
GL29974-R1	0.133469	0.133469	NE				GL29974-R1	0.257846	0.257846	NE
GL29974-R2	0.133469	0.133469	NE				GL29974-R2	0.257846	0.257846	NE
GL24040-R1	0.133469	0	E				GL24040-R1	0.257846	0	E
GL18122-R1	0.133469	0.133469	NE				GL18122-R1	0.257846	0.257846	NE
GL21691-R1	0.133469	0.133467	NE				GL21691-R1	0.257846	0.257833	NE
GL30625-R1	0.133469	0.133469	NE				GL30625-R1	0.257846	0.257846	NE
GL30624-R1	0.133469	0.133469	NE				GL30624-R1	0.257846	0.257846	NE
GL19803-R1	0.133469	0	E				GL19803-R1	0.257846	0	E
GL24635-R1	0.133469	0	E				GL24635-R1	0.257846	0	E
GL30750-R1	0.133469	0	E				GL30750-R1	0.257846	0	E
GL20056-R1	0.133469	0.133469	NE				GL20056-R1	0.257846	0.257846	NE
GL26703-R1	0.133469	0.133469	NE				GL26703-R1	0.257846	0.257846	NE
GL18150-R1	0.133469	0.133469	NE				GL18150-R1	0.257846	0.257846	NE
GL27043-R1	0.133469	0.133469	NE				GL27043-R1	0.257846	0.257846	NE
GL27041-R1	0.133469	0.133469	NE				GL27041-R1	0.257846	0.257846	NE
GL31290-R1	0.133469	0.133469	NE				GL31290-R1	0.257846	0.257846	NE
GL22258-R1	0.133469	0.133469	NE				GL22258-R1	0.257846	0.257846	NE
GL30997-R1	0.133469	0.133469	NE				GL30997-R1	0.257846	0.257846	NE
GL18407-R1	0.133469	0.133469	NE				GL18407-R1	0.257846	0.257846	NE
GL31218-R1	0.133469	0.133469	NE				GL31218-R1	0.257846	0.257846	NE
GL23554-R1	0.133469	0.133469	NE				GL23554-R1	0.257846	0.257846	NE
GL28091-R1	0.133469	0	E				GL28091-R1	0.257846	0	E
GL22808-R1	0.133469	0	E				GL22808-R1	0.257846	0	E
GL23848-R1	0.133469	0	E				GL23848-R1	0.257846	0	E
GL25730-R1	0.133469	0	E				GL25730-R1	0.257846	0	E
GL25960-R1	0.133469	0.133469	NE				GL25960-R1	0.257846	0.257846	NE
GL24589-R2	0.133469	0.133469	NE				GL24589-R2	0.257846	0.257846	NE
GL24589-R1	0.133469	0.133469	NE				GL24589-R1	0.257846	0.257846	NE
GL23761-R1	0.133469	0.133396	NE				GL23761-R1	0.257846	0.257263	NE
GL25591-R1	0.133469	0.133469	NE				GL25591-R1	0.257846	0.257846	NE
GL24569-R1	0.133469	0.133469	NE				GL24569-R1	0.257846	0.257846	NE
GL24569-R2	0.133469	0.133469	NE				GL24569-R2	0.257846	0.257846	NE
GL16391-R1	0.133469	0.133469	NE				GL16391-R1	0.257846	0.257846	NE
GL25449-R1	0.133469	0.133469	NE				GL25449-R1	0.257846	0.257846	NE
GL18099-R1	0.133469	0.133469	NE				GL18099-R1	0.257846	0.257846	NE
GL28475-R1	0.133469	0.133347	NE				GL28475-R1	0.257846	0.25732	NE
GL26615-R1	0.133469	-1.41103e-13	E				GL26615-R1	0.257846	0	E
GL25758-R1	0.133469	0.133468	NE				GL25758-R1	0.257846	0.257842	NE
GL25778-R1	0.133469	0.133469	NE				GL25778-R1	0.257846	0.257846	NE
GL18595-R1	0.133469	0.133469	NE				GL18595-R1	0.257846	0.257846	NE
GL24452-R1	0.133469	9.2175e-11	E				GL24452-R1	0.257846	0	E
GL29719-R1	0.133469	0.133469	NE				GL29719-R1	0.257846	0.257846	NE
GL25683-R1	0.133469	0.133469	NE				GL25683-R1	0.257846	0.257846	NE
GL15763-R1	0.133469	0.133469	NE				GL15763-R1	0.257846	0.257846	NE
GL19452-R1	0.133469	0.133469	NE				GL19452-R1	0.257846	0.257846	NE
GL25562-R1	0.133469	0.133469	NE				GL25562-R1	0.257846	0.257846	NE
GL26051-R1	0.133469	0.133469	NE				GL26051-R1	0.257846	0.257846	NE
GL31139-R1	0.133469	0.133469	NE				GL31139-R1	0.257846	0.257846	NE
GL25862-R1	0.133469	0.133465	NE				GL25862-R1	0.257846	0.257819	NE
GL21958-R1	0.133469	0.133469	NE				GL21958-R1	0.257846	0.257846	NE
GL16815-R1	0.133469	0.133469	NE				GL16815-R1	0.257846	0.257846	NE
GL22910-R1	0.133469	0.133469	NE				GL22910-R1	0.257846	0.257846	NE
GL29423-R1	0.133469	0.133469	NE				GL29423-R1	0.257846	0.257846	NE
GL24034-R1	0.133469	0	E				GL24034-R1	0.257846	0	E
GL24486-R1	0.133469	0.133469	NE				GL24486-R1	0.257846	0.257846	NE
GL30357-R1	0.133469	0.133469	NE				GL30357-R1	0.257846	0.257846	NE
GL24700-R1	0.133469	0.133469	NE				GL24700-R1	0.257846	0.257846	NE
GL26698-R1	0.133469	0.133469	NE				GL26698-R1	0.257846	0.257846	NE
GL23627-R1	0.133469	0.133469	NE				GL23627-R1	0.257846	0.257846	NE
GL24943-R1	0.133469	0	E				GL24943-R1	0.257846	0	E
GL27634-R1	0.133469	0.133469	NE				GL27634-R1	0.257846	0.257846	NE
GL19660-R1	0.133469	0.133469	NE				GL19660-R1	0.257846	0.257846	NE
GL17915-R1	0.133469	0.133469	NE				GL17915-R1	0.257846	0.257846	NE
GL29355-R1	0.133469	0.133469	NE				GL29355-R1	0.257846	0.257846	NE
GL20927-R1	0.133469	0.133469	NE				GL20927-R1	0.257846	0.257846	NE
GL29324-R1	0.133469	0.133469	NE				GL29324-R1	0.257846	0.257846	NE
GL19135-R1	0.133469	0.133469	NE				GL19135-R1	0.257846	0.257846	NE
GL24906-R1	0.133469	0.133469	NE				GL24906-R1	0.257846	0.257846	NE
GL29916-R1	0.133469	0.133469	NE				GL29916-R1	0.257846	0.257846	NE
GL29343-R1	0.133469	0.133469	NE				GL29343-R1	0.257846	0.257846	NE
GL31522-R1	0.133469	0.133469	NE				GL31522-R1	0.257846	0.257846	NE
GL30063-R1	0.133469	0.133469	NE				GL30063-R1	0.257846	0.257846	NE
GL31331-R1	0.133469	0	E				GL31331-R1	0.257846	0	E
GL20807-R1	0.133469	0	E				GL20807-R1	0.257846	0	E
GL26867-R1	0.133469	0.133469	NE				GL26867-R1	0.257846	0.257846	NE
GL26871-R1	0.133469	0.133469	NE				GL26871-R1	0.257846	0.257846	NE
GL31600-R1	0.133469	0.133469	NE				GL31600-R1	0.257846	0.257846	NE
GL19435-R1	0.133469	0.133469	NE				GL19435-R1	0.257846	0.257846	NE
GL30256-R1	0.133469	0	E				GL30256-R1	0.257846	0	E
GL30289-R1	0.133469	0	E				GL30289-R1	0.257846	0	E
GL29370-R1	0.133469	0	E				GL29370-R1	0.257846	0	E
GL15239-R1	0.133469	0.133469	NE				GL15239-R1	0.257846	0.257846	NE
GL24266-R1	0.133469	0	E				GL24266-R1	0.257846	0	E
GL24693-R1	0.133469	0.133469	NE				GL24693-R1	0.257846	0.257846	NE
GL27636-R1	0.133469	0.133469	NE				GL27636-R1	0.257846	0.257846	NE
GL31646-R1	0.133469	0.133469	NE				GL31646-R1	0.257846	0.257846	NE
GL21649-R1	0.133469	0.133469	NE				GL21649-R1	0.257846	0.257846	NE
GL24633-R1	0.133469	0.133469	NE				GL24633-R1	0.257846	0.257846	NE
GL25682-R1	0.133469	0.133469	NE				GL25682-R1	0.257846	0.257846	NE
GL30153-R1	0.133469	0.133469	NE				GL30153-R1	0.257846	0.257846	NE
GL22504-R1	0.133469	0.133469	NE				GL22504-R1	0.257846	0.257846	NE
GL26657-R1	0.133469	0.133469	NE				GL26657-R1	0.257846	0.257846	NE
GL18616-R1	0.133469	0.133469	NE				GL18616-R1	0.257846	0.257846	NE
GL19284-R1	0.133469	0.133469	NE				GL19284-R1	0.257846	0.257846	NE
GL22520-R1	0.133469	0.133469	NE				GL22520-R1	0.257846	0.257846	NE
GL17841-R1	0.133469	0.133469	NE				GL17841-R1	0.257846	0.257846	NE
GL31045-R1	0.133469	0.133469	NE				GL31045-R1	0.257846	0.257846	NE
GL27321-R1	0.133469	0.133469	NE				GL27321-R1	0.257846	0.257846	NE
GL29675-R1	0.133469	0.133469	NE				GL29675-R1	0.257846	0.257846	NE
GL31174-R1	0.133469	0.133469	NE				GL31174-R1	0.257846	0.257846	NE
GL15698-R1	0.133469	0.133469	NE				GL15698-R1	0.257846	0.257846	NE
GL29478-R1	0.133469	0.133469	NE				GL29478-R1	0.257846	0.257846	NE
GL21867-R1	0.133469	0.133469	NE				GL21867-R1	0.257846	0.257846	NE
GL21960-R1	0.133469	0.133469	NE				GL21960-R1	0.257846	0.257846	NE
GL23586-R1	0.133469	0.133469	NE				GL23586-R1	0.257846	0.257846	NE
GL20748-R1	0.133469	0.133469	NE				GL20748-R1	0.257846	0.257846	NE
GL29426-R1	0.133469	0.133469	NE				GL29426-R1	0.257846	0.257846	NE
GL23923-R1	0.133469	0.133469	NE				GL23923-R1	0.257846	0.257846	NE
GL22206-R1	0.133469	0.133469	NE				GL22206-R1	0.257846	0.257846	NE
GL17541-R1	0.133469	0.133469	NE				GL17541-R1	0.257846	0.257846	NE
GL29313-R1	0.133469	0.133469	NE				GL29313-R1	0.257846	0.257846	NE
GL23120-R1	0.133469	0.133469	NE				GL23120-R1	0.257846	0.257846	NE
GL30723-R1	0.133469	0.133469	NE				GL30723-R1	0.257846	0.257846	NE
GL26728-R1	0.133469	0	E				GL26728-R1	0.257846	0	E
GL22110-R1	0.133469	0.133469	NE				GL22110-R1	0.257846	0.257846	NE
GL23571-R1	0.133469	0.133469	NE				GL23571-R1	0.257846	0.257846	NE
GL20888-R1	0.133469	0.133469	NE				GL20888-R1	0.257846	0.257846	NE
GL31188-R1	0.133469	0.133469	NE				GL31188-R1	0.257846	0.257846	NE
GL24833-R1	0.133469	0.133469	NE				GL24833-R1	0.257846	0.257846	NE
GL24737-R1	0.133469	0.133469	NE				GL24737-R1	0.257846	0.257846	NE
GL21376-R1	0.133469	0.133469	NE				GL21376-R1	0.257846	0.257846	NE
GL20722-R1	0.133469	0.133469	NE				GL20722-R1	0.257846	0.257846	NE
GL30083-R1	0.133469	0.133469	NE				GL30083-R1	0.257846	0.257846	NE
GL22508-R1	0.133469	0	E				GL22508-R1	0.257846	0	E
GL21392-R1	0.133469	0	E				GL21392-R1	0.257846	0	E
GL18582-R1	0.133469	0.133469	NE				GL18582-R1	0.257846	0.257846	NE
GL29666-R1	0.133469	0.133469	NE				GL29666-R1	0.257846	0.257846	NE
GL16153-R1	0.133469	0.133469	NE				GL16153-R1	0.257846	0.257846	NE
GL29534-R1	0.133469	0.133469	NE				GL29534-R1	0.257846	0.257846	NE
GL25501-R1	0.133469	0.133469	NE				GL25501-R1	0.257846	0.257846	NE
GL22720-R1	0.133469	0	E				GL22720-R1	0.257846	0	E
GL30171-R1	0.133469	0.133469	NE				GL30171-R1	0.257846	0.257846	NE
GL23630-R1	0.133469	0.133469	NE				GL23630-R1	0.257846	0.257846	NE
GL24671-R1	0.133469	0.133469	NE				GL24671-R1	0.257846	0.257846	NE
GL25298-R1	0.133469	0.133469	NE				GL25298-R1	0.257846	0.257846	NE
GL24678-R1	0.133469	0	E				GL24678-R1	0.257846	0	E
GL24487-R1	0.133469	0.133469	NE				GL24487-R1	0.257846	0.257846	NE
GL16974-R1	0.133469	0.133469	NE				GL16974-R1	0.257846	0.257846	NE
GL21682-R1	0.133469	0.133469	NE				GL21682-R1	0.257846	0.257846	NE
GL20408-R1	0.133469	0.133469	NE				GL20408-R1	0.257846	0.257846	NE
GL31144-R1	0.133469	0.133469	NE				GL31144-R1	0.257846	0.257846	NE
GL31514-R1	0.133469	0.133469	NE				GL31514-R1	0.257846	0.257846	NE
GL25059-R1	0.133469	0.133469	NE				GL25059-R1	0.257846	0.257846	NE
GL28729-R1	0.133469	0.133469	NE				GL28729-R1	0.257846	0.257846	NE
GL22317-R1	0.133469	0.133469	NE				GL22317-R1	0.257846	0.257846	NE
GL26511-R1	0.133469	0.133469	NE				GL26511-R1	0.257846	0.257846	NE
GL27363-R1	0.133469	0.133469	NE				GL27363-R1	0.257846	0.257846	NE
GL21632-R1	0.133469	0.133469	NE				GL21632-R1	0.257846	0.257846	NE
GL30614-R1	0.133469	0.133469	NE				GL30614-R1	0.257846	0.257846	NE
GL24371-R1	0.133469	0.133469	NE				GL24371-R1	0.257846	0.257846	NE
GL20230-R1	0.133469	0.133469	NE				GL20230-R1	0.257846	0.257846	NE
GL24704-R1	0.133469	0.133469	NE				GL24704-R1	0.257846	0.257846	NE
GL22854-R1	0.133469	0.133469	NE				GL22854-R1	0.257846	0.257846	NE
GL23911-R1	0.133469	0.133469	NE				GL23911-R1	0.257846	0.257846	NE
GL25371-R1	0.133469	0.130673	NE				GL25371-R1	0.257846	0.241344	NE
GL21690-R1	0.133469	0	E				GL21690-R1	0.257846	0	E
GL23376-R1	0.133469	0	E				GL23376-R1	0.257846	0	E
GL18675-R1	0.133469	0	E				GL18675-R1	0.257846	0	E
GL22375-R1	0.133469	0.133469	NE				GL22375-R1	0.257846	0.257846	NE
GL26139-R1	0.133469	0.133469	NE				GL26139-R1	0.257846	0.257846	NE
GL23832-R1	0.133469	0	E				GL23832-R1	0.257846	0	E
GL23074-R1	0.133469	0	E				GL23074-R1	0.257846	0	E
GL16838-R1	0.133469	0	E				GL16838-R1	0.257846	0	E
GL22371-R1	0.133469	0	E				GL22371-R1	0.257846	0	E
GL18323-R1	0.133469	0	E				GL18323-R1	0.257846	0	E
GL26052-R1	0.133469	0	E				GL26052-R1	0.257846	0	E
GL30444-R1	0.133469	0	E				GL30444-R1	0.257846	0	E
GL21870-R1	0.133469	0	E				GL21870-R1	0.257846	0	E
GL30230-R1	0.133469	0.133469	NE				GL30230-R1	0.257846	0.257846	NE
GL21829-R1	0.133469	0.133469	NE				GL21829-R1	0.257846	0.257846	NE
GL21000-R1	0.133469	0.133469	NE				GL21000-R1	0.257846	0.257846	NE
GL20589-R1	0.133469	0.133469	NE				GL20589-R1	0.257846	0.257846	NE
GL25388-R1	0.133469	0.133469	NE				GL25388-R1	0.257846	0.257846	NE
GL17336-R1	0.133469	0.133469	NE				GL17336-R1	0.257846	0.257846	NE
GL25157-R2	0.133469	0.133469	NE				GL25157-R2	0.257846	0.257846	NE
GL25157-R1	0.133469	0.133469	NE				GL25157-R1	0.257846	0.257846	NE
GL16966-R1	0.133469	0.133469	NE				GL16966-R1	0.257846	0.257846	NE
GL21718-R1	0.133469	0.133469	NE				GL21718-R1	0.257846	0.257846	NE
GL31296-R1	0.133469	0.133469	NE				GL31296-R1	0.257846	0.257846	NE
GL31296-R2	0.133469	0.133469	NE				GL31296-R2	0.257846	0.257846	NE
GL31295-R1	0.133469	0.133469	NE				GL31295-R1	0.257846	0.257846	NE
GL31295-R2	0.133469	0.133469	NE				GL31295-R2	0.257846	0.257846	NE
GL26740-R1	0.133469	0.133469	NE				GL26740-R1	0.257846	0.257846	NE
GL30086-R1	0.133469	0.133469	NE				GL30086-R1	0.257846	0.257846	NE
GL24114-R1	0.133469	0.133469	NE				GL24114-R1	0.257846	0.257846	NE
GL30344-R1	0.133469	0.133469	NE				GL30344-R1	0.257846	0.257846	NE
GL30004-R1	0.133469	0.133469	NE				GL30004-R1	0.257846	0.257846	NE
GL24188-R1	0.133469	0	E				GL24188-R1	0.257846	0	E
GL23176-R1	0.133469	0.133469	NE				GL23176-R1	0.257846	0.257846	NE
GL26761-R1	0.133469	0.133469	NE				GL26761-R1	0.257846	0.257846	NE
GL27881-R1	0.133469	0.133469	NE				GL27881-R1	0.257846	0.257846	NE
GL23502-R1	0.133469	0.133469	NE				GL23502-R1	0.257846	0.257846	NE
GL25670-R1	0.133469	0.133469	NE				GL25670-R1	0.257846	0.257846	NE
GL21676-R1	0.133469	0.133469	NE				GL21676-R1	0.257846	0.257846	NE
GL30558-R1	0.133469	0	E				GL30558-R1	0.257846	0	E
GL20137-R1	0.133469	0.133469	NE				GL20137-R1	0.257846	0.257846	NE
GL17560-R1	0.133469	0.133469	NE				GL17560-R1	0.257846	0.257846	NE
GL25919-R1	0.133469	0.133469	NE				GL25919-R1	0.257846	0.257846	NE
GL25919-R2	0.133469	0.133469	NE				GL25919-R2	0.257846	0.257846	NE
GL25107-R2	0.133469	0.133469	NE				GL25107-R2	0.257846	0.257846	NE
GL25107-R1	0.133469	0.133469	NE				GL25107-R1	0.257846	0.257846	NE
GL18154-R1	0.133469	0.133469	NE				GL18154-R1	0.257846	0.257846	NE
GL30752-R1	0.133469	0.133469	NE				GL30752-R1	0.257846	0.257846	NE
GL20908-R1	0.133469	0.133469	NE				GL20908-R1	0.257846	0.257846	NE
GL20908-R2	0.133469	0.133469	NE				GL20908-R2	0.257846	0.257846	NE
GL22223-R1	0.133469	0.133469	NE				GL22223-R1	0.257846	0.257846	NE
GL23646-R1	0.133469	0.133469	NE				GL23646-R1	0.257846	0.257846	NE
GL18436-R1	0.133469	0.133469	NE				GL18436-R1	0.257846	0.257846	NE
GL23180-R1	0.133469	0.133469	NE				GL23180-R1	0.257846	0.257846	NE
GL23589-R1	0.133469	0.133469	NE				GL23589-R1	0.257846	0.257846	NE
GL24088-R1	0.133469	0	E				GL24088-R1	0.257846	0	E
GL17808-R1	0.133469	0	E				GL17808-R1	0.257846	0	E
GL25304-R1	0.133469	0	E				GL25304-R1	0.257846	0	E
GL29704-R1	0.133469	0	E				GL29704-R1	0.257846	0	E
GL25499-R1	0.133469	0.133469	NE				GL25499-R1	0.257846	0.257846	NE
GL22068-R1	0.133469	0.133469	NE				GL22068-R1	0.257846	0.257846	NE
GL24453-R1	0.133469	0	E				GL24453-R1	0.257846	0	E
GL24585-R1	0.133469	0.133469	NE				GL24585-R1	0.257846	0.257846	NE
GL30574-R1	0.133469	0.133469	NE				GL30574-R1	0.257846	0.257846	NE
GL15842-R1	0.133469	0.133469	NE				GL15842-R1	0.257846	0.257846	NE
GL22321-R1	0.133469	0.133469	NE				GL22321-R1	0.257846	0.257846	NE
GL21984-R2	0.133469	0.133469	NE				GL21984-R2	0.257846	0.257846	NE
GL21984-R1	0.133469	0.133469	NE				GL21984-R1	0.257846	0.257846	NE
GL22640-R1	0.133469	0.133469	NE				GL22640-R1	0.257846	0.257846	NE
GL31565-R1	0.133469	0.133469	NE				GL31565-R1	0.257846	0.257846	NE
GL27133-R1	0.133469	0.133469	NE				GL27133-R1	0.257846	0.257846	NE
GL20894-R1	0.133469	0.133469	NE				GL20894-R1	0.257846	0.257846	NE
GL24942-R1	0.133469	0.133469	NE				GL24942-R1	0.257846	0.257846	NE
GL23621-R1	0.133469	0.133469	NE				GL23621-R1	0.257846	0.257846	NE
GL25442-R1	0.133469	0.133469	NE				GL25442-R1	0.257846	0.257846	NE
GL29609-R1	0.133469	0.133469	NE				GL29609-R1	0.257846	0.257846	NE
GL22888-R1	0.133469	0.133469	NE				GL22888-R1	0.257846	0.257846	NE
GL24380-R1	0.133469	0.133469	NE				GL24380-R1	0.257846	0.257846	NE
GL22207-R1	0.133469	0.133469	NE				GL22207-R1	0.257846	0.257846	NE
GL17348-R1	0.133469	0.133469	NE				GL17348-R1	0.257846	0.257846	NE
GL24686-R1	0.133469	0.133469	NE				GL24686-R1	0.257846	0.257846	NE
GL19116-R1	0.133469	0.133469	NE				GL19116-R1	0.257846	0.257846	NE
GL29468-R1	0.133469	0.133469	NE				GL29468-R1	0.257846	0.257846	NE
GL17041-R1	0.133469	0.133469	NE				GL17041-R1	0.257846	0.257846	NE
GL16923-R1	0.133469	0.133469	NE				GL16923-R1	0.257846	0.257846	NE
GL31336-R1	0.133469	0.133469	NE				GL31336-R1	0.257846	0.257846	NE
GL29870-R1	0.133469	0.133469	NE				GL29870-R1	0.257846	0.257846	NE
GL29870-R2	0.133469	0.133469	NE				GL29870-R2	0.257846	0.257846	NE
GL31136-R1	0.133469	0.133469	NE				GL31136-R1	0.257846	0.257846	NE
GL26650-R1	0.133469	0.133469	NE				GL26650-R1	0.257846	0.257846	NE
GL19811-R1	0.133469	0.133469	NE				GL19811-R1	0.257846	0.257846	NE
GL20856-R1	0.133469	0.133469	NE				GL20856-R1	0.257846	0.257846	NE
GL22881-R1	0.133469	0.133469	NE				GL22881-R1	0.257846	0.257846	NE
GL21733-R1	0.133469	0.133469	NE				GL21733-R1	0.257846	0.257846	NE
GL19735-R1	0.133469	0.133469	NE				GL19735-R1	0.257846	0.257846	NE
GL24108-R1	0.133469	0.133469	NE				GL24108-R1	0.257846	0.257846	NE
GL24854-R1	0.133469	0.133469	NE				GL24854-R1	0.257846	0.257846	NE
GL29391-R1	0.133469	0.133469	NE				GL29391-R1	0.257846	0.257846	NE
GL21073-R1	0.133469	0.133469	NE				GL21073-R1	0.257846	0.257846	NE
GL22447-R1	0.133469	0.133469	NE				GL22447-R1	0.257846	0.257846	NE
GL15219-R1	0.133469	0.133469	NE				GL15219-R1	0.257846	0.257846	NE
GL24601-R1	0.133469	0.133469	NE				GL24601-R1	0.257846	0.257846	NE
GL25426-R1	0.133469	0.133469	NE				GL25426-R1	0.257846	0.257846	NE
GL22405-R1	0.133469	0.133469	NE				GL22405-R1	0.257846	0.257846	NE
GL16434-R1	0.133469	0.133469	NE				GL16434-R1	0.257846	0.257846	NE
GL20526-R1	0.133469	0.133469	NE				GL20526-R1	0.257846	0.257846	NE
GL21011-R1	0.133469	0.133469	NE				GL21011-R1	0.257846	0.257846	NE
GL15853-R1	0.133469	0.133469	NE				GL15853-R1	0.257846	0.257846	NE
GL21744-R1	0.133469	0.133469	NE				GL21744-R1	0.257846	0.257846	NE
GL23088-R1	0.133469	0.133469	NE				GL23088-R1	0.257846	0.257846	NE
GL29937-R2	0.133469	0.133469	NE				GL29937-R2	0.257846	0.257846	NE
GL29937-R1	0.133469	0.133469	NE				GL29937-R1	0.257846	0.257846	NE
GL23068-R2	0.133469	0.133469	NE				GL23068-R2	0.257846	0.257846	NE
GL23068-R1	0.133469	0.133469	NE				GL23068-R1	0.257846	0.257846	NE
GL19746-R1	0.133469	0.133469	NE				GL19746-R1	0.257846	0.257846	NE
GL27449-R1	0.133469	0.133469	NE				GL27449-R1	0.257846	0.257846	NE
GL21773-R1	0.133469	0.133469	NE				GL21773-R1	0.257846	0.257846	NE
GL22927-R1	0.133469	0.133469	NE				GL22927-R1	0.257846	0.257846	NE
GL21772-R1	0.133469	0.133469	NE				GL21772-R1	0.257846	0.257846	NE
GL22556-R1	0.133469	0.133469	NE				GL22556-R1	0.257846	0.257846	NE
GL22344-R1	0.133469	0.133469	NE				GL22344-R1	0.257846	0.257846	NE
GL22344-R2	0.133469	0.133469	NE				GL22344-R2	0.257846	0.257846	NE
GL25452-R1	0.133469	0.133469	NE				GL25452-R1	0.257846	0.257846	NE
GL23118-R1	0.133469	0.133469	NE				GL23118-R1	0.257846	0.257846	NE
GL26711-R1	0.133469	0.133469	NE				GL26711-R1	0.257846	0.257846	NE
GL29589-R1	0.133469	0.133469	NE				GL29589-R1	0.257846	0.257846	NE
GL20736-R1	0.133469	0.133469	NE				GL20736-R1	0.257846	0.257846	NE
GL28933-R1	0.133469	0.133469	NE				GL28933-R1	0.257846	0.257846	NE
GL23271-R1	0.133469	0.133469	NE				GL23271-R1	0.257846	0.257846	NE
GL20971-R1	0.133469	0.133469	NE				GL20971-R1	0.257846	0.257846	NE
GL31406-R1	0.133469	0.133469	NE				GL31406-R1	0.257846	0.257846	NE
GL20912-R1	0.133469	0.133469	NE				GL20912-R1	0.257846	0.257846	NE
GL21051-R1	0.133469	0.133469	NE				GL21051-R1	0.257846	0.257846	NE
GL16126-R1	0.133469	0.133469	NE				GL16126-R1	0.257846	0.257846	NE
GL22815-R1	0.133469	0.133469	NE				GL22815-R1	0.257846	0.257846	NE
GL24099-R1	0.133469	0.133469	NE				GL24099-R1	0.257846	0.257846	NE
GL22186-R1	0.133469	0.133469	NE				GL22186-R1	0.257846	0.257846	NE
GL30450-R1	0.133469	0.133469	NE				GL30450-R1	0.257846	0.257846	NE
GL30656-R1	0.133469	0.133469	NE				GL30656-R1	0.257846	0.257846	NE
GL25833-R1	0.133469	0.133469	NE				GL25833-R1	0.257846	0.257846	NE
GL26065-R1	0.133469	0.133469	NE				GL26065-R1	0.257846	0.257846	NE
GL23411-R1	0.133469	0.133469	NE				GL23411-R1	0.257846	0.257846	NE
GL25963-R1	0.133469	0.133469	NE				GL25963-R1	0.257846	0.257846	NE
GL25961-R1	0.133469	0.133469	NE				GL25961-R1	0.257846	0.257846	NE
GL26064-R1	0.133469	0.133469	NE				GL26064-R1	0.257846	0.257846	NE
GL19300-R1	0.133469	0.133469	NE				GL19300-R1	0.257846	0.257846	NE
GL30779-R1	0.133469	0.133469	NE				GL30779-R1	0.257846	0.257846	NE
GL25006-R1	0.133469	0.133469	NE				GL25006-R1	0.257846	0.257846	NE
GL24503-R1	0.133469	0.133469	NE				GL24503-R1	0.257846	0.257846	NE
GL20131-R1	0.133469	0.133469	NE				GL20131-R1	0.257846	0.257846	NE
GL23540-R1	0.133469	0.133469	NE				GL23540-R1	0.257846	0.257846	NE
GL23703-R1	0.133469	0.133469	NE				GL23703-R1	0.257846	0.257846	NE
GL17436-R1	0.133469	0.133469	NE				GL17436-R1	0.257846	0.257846	NE
GL21332-R1	0.133469	0.133469	NE				GL21332-R1	0.257846	0.257846	NE
GL21022-R1	0.133469	0.133469	NE				GL21022-R1	0.257846	0.257846	NE
GL25002-R1	0.133469	0.133469	NE				GL25002-R1	0.257846	0.257846	NE
GL21280-R1	0.133469	0.133469	NE				GL21280-R1	0.257846	0.257846	NE
GL17440-R1	0.133469	0.133469	NE				GL17440-R1	0.257846	0.257846	NE
GL25007-R1	0.133469	0.133469	NE				GL25007-R1	0.257846	0.257846	NE
GL24502-R1	0.133469	0.133469	NE				GL24502-R1	0.257846	0.257846	NE
GL23229-R1	0.133469	0.133469	NE				GL23229-R1	0.257846	0.257846	NE
GL20932-R1	0.133469	0.133469	NE				GL20932-R1	0.257846	0.257846	NE
GL25385-R1	0.133469	0.133469	NE				GL25385-R1	0.257846	0.257846	NE
GL21581-R1	0.133469	0.133469	NE				GL21581-R1	0.257846	0.257846	NE
GL22661-R1	0.133469	0.133469	NE				GL22661-R1	0.257846	0.257846	NE
GL24286-R1	0.133469	0.133469	NE				GL24286-R1	0.257846	0.257846	NE
GL30855-R1	0.133469	0.133469	NE				GL30855-R1	0.257846	0.257846	NE
GL29864-R1	0.133469	0.133469	NE				GL29864-R1	0.257846	0.257846	NE
GL27256-R1	0.133469	0.133469	NE				GL27256-R1	0.257846	0.257846	NE
GL16451-R1	0.133469	0.133469	NE				GL16451-R1	0.257846	0.257846	NE
GL25544-R1	0.133469	0.133469	NE				GL25544-R1	0.257846	0.257846	NE
GL21152-R1	0.133469	0.133469	NE				GL21152-R1	0.257846	0.257846	NE
GL16452-R1	0.133469	0.133469	NE				GL16452-R1	0.257846	0.257846	NE
GL28199-R1	0.133469	0.133469	NE				GL28199-R1	0.257846	0.257846	NE
GL31246-R1	0.133469	0.133469	NE				GL31246-R1	0.257846	0.257846	NE
GL19518-R1	0.133469	0.133469	NE				GL19518-R1	0.257846	0.257846	NE
GL25703-R1	0.133469	0.133469	NE				GL25703-R1	0.257846	0.257846	NE
GL20136-R1	0.133469	0.133469	NE				GL20136-R1	0.257846	0.257846	NE
GL21279-R1	0.133469	0.133469	NE				GL21279-R1	0.257846	0.257846	NE
GL16154-R1	0.133469	0.133469	NE				GL16154-R1	0.257846	0.257846	NE
GL31453-R1	0.133469	0.133469	NE				GL31453-R1	0.257846	0.257846	NE
GL23173-R1	0.133469	0.133469	NE				GL23173-R1	0.257846	0.257846	NE
GL30638-R1	0.133469	0.133469	NE				GL30638-R1	0.257846	0.257846	NE
GL15342-R1	0.133469	0.133469	NE				GL15342-R1	0.257846	0.257846	NE
GL21866-R1	0.133469	0.133469	NE				GL21866-R1	0.257846	0.257846	NE
GL24337-R1	0.133469	0.133469	NE				GL24337-R1	0.257846	0.257846	NE
GL22354-R1	0.133469	0.133469	NE				GL22354-R1	0.257846	0.257846	NE
GL21815-R1	0.133469	0.133469	NE				GL21815-R1	0.257846	0.257846	NE
GL20600-R1	0.133469	0.133469	NE				GL20600-R1	0.257846	0.257846	NE
GL23319-R1	0.133469	0.13294	NE				GL23319-R1	0.257846	0.253615	NE
GL25914-R1	0.133469	0.0214523	NE				GL25914-R1	0.257846	0	E
GL29594-R1	0.133469	0.133469	NE				GL29594-R1	0.257846	0.257846	NE
GL26008-R1	0.133469	0.133469	NE				GL26008-R1	0.257846	0.257846	NE
GL21728-R1	0.133469	0.133469	NE				GL21728-R1	0.257846	0.257846	NE
GL25805-R2	0.133469	0.133469	NE				GL25805-R2	0.257846	0.257846	NE
GL25805-R1	0.133469	0.133469	NE				GL25805-R1	0.257846	0.257846	NE
GL22354-R2	0.133469	0.133469	NE				GL22354-R2	0.257846	0.257846	NE
GL21498-R1	0.133469	0.133469	NE				GL21498-R1	0.257846	0.257846	NE
GL22019-R1	0.133469	0.133469	NE				GL22019-R1	0.257846	0.257846	NE
GL29336-R1	0.133469	0.133469	NE				GL29336-R1	0.257846	0.257846	NE
GL15391-R1	0.133469	0.133469	NE				GL15391-R1	0.257846	0.257846	NE
GL30579-R1	0.133469	0.133469	NE				GL30579-R1	0.257846	0.257846	NE
GL26039-R1	0.133469	0.133469	NE				GL26039-R1	0.257846	0.257846	NE
GL19745-R1	0.133469	0.133469	NE				GL19745-R1	0.257846	0.257846	NE
GL25576-R1	0.133469	0.133469	NE				GL25576-R1	0.257846	0.257846	NE
GL29979-R1	0.133469	0.133469	NE				GL29979-R1	0.257846	0.257846	NE
GL29979-R2	0.133469	0.133469	NE				GL29979-R2	0.257846	0.257846	NE
GL25119-R1	0.133469	0.133469	NE				GL25119-R1	0.257846	0.257846	NE
GL25710-R1	0.133469	0.133469	NE				GL25710-R1	0.257846	0.257846	NE
GL29960-R1	0.133469	0.133469	NE				GL29960-R1	0.257846	0.257846	NE
GL22680-R1	0.133469	0.133249	NE				GL22680-R1	0.257846	0.256252	NE
GL22404-R1	0.133469	0.133469	NE				GL22404-R1	0.257846	0.257846	NE
GL17967-R1	0.133469	0.133469	NE				GL17967-R1	0.257846	0.257846	NE
GL21671-R1	0.133469	0.133469	NE				GL21671-R1	0.257846	0.257846	NE
GL25809-R1	0.133469	0.133469	NE				GL25809-R1	0.257846	0.257846	NE
GL20911-R1	0.133469	0.133469	NE				GL20911-R1	0.257846	0.257846	NE
GL22201-R1	0.133469	0.133469	NE				GL22201-R1	0.257846	0.257846	NE
GL22443-R1	0.133469	0.133469	NE				GL22443-R1	0.257846	0.257846	NE
GL22200-R1	0.133469	0.133469	NE				GL22200-R1	0.257846	0.257846	NE
GL20247-R1	0.133469	0.133469	NE				GL20247-R1	0.257846	0.257846	NE
GL15291-R1	0.133469	0.133469	NE				GL15291-R1	0.257846	0.257846	NE
GL24133-R1	0.133469	0.133469	NE				GL24133-R1	0.257846	0.257846	NE
GL25231-R1	0.133469	0.133469	NE				GL25231-R1	0.257846	0.257846	NE
GL29464-R1	0.133469	0.133469	NE				GL29464-R1	0.257846	0.257846	NE
GL26640-R1	0.133469	0.133469	NE				GL26640-R1	0.257846	0.257846	NE
GL27597-R1	0.133469	0.133469	NE				GL27597-R1	0.257846	0.257846	NE
GL25606-R1	0.133469	0.133469	NE				GL25606-R1	0.257846	0.257846	NE
GL26775-R1	0.133469	0.133469	NE				GL26775-R1	0.257846	0.257846	NE
GL16837-R1	0.133469	0.133469	NE				GL16837-R1	0.257846	0.257846	NE
GL23715-R1	0.133469	0.133469	NE				GL23715-R1	0.257846	0.257846	NE
GL23491-R1	0.133469	0.133469	NE				GL23491-R1	0.257846	0.257846	NE
GL28147-R1	0.133469	0.133469	NE				GL28147-R1	0.257846	0.257846	NE
GL20717-R1	0.133469	0.133469	NE				GL20717-R1	0.257846	0.257846	NE
GL29334-R1	0.133469	0.131382	NE				GL29334-R1	0.257846	0.246053	NE
GL30069-R1	0.133469	0.133469	NE				GL30069-R1	0.257846	0.257846	NE

## Sheet: compare
Minimal Growth Medium							Fermentation Medium
Essential genes for growth			Essential genes for EPS production				Essential genes for growth			Essential genes for EPS production
Essential genes for growth(MG)	Subsystem	Subsystem number	Essential genes for EPS production(MG)	Subsystem	Subsystem number		Essential genes for growth(FM)	Subsystem	Subsystem number	Essential genes for EPS production(FM)	Subsystem	Subsystem number
GL21912-R1	Carbohydrate metabolism: Glycolysis/Gluconeogenesis	23	GL21912-R1	Carbohydrate metabolism: Glycolysis/Gluconeogenesis	27		GL21912-R1	Carbohydrate metabolism: Glycolysis/Gluconeogenesis	20	GL21912-R1	Carbohydrate metabolism: Glycolysis/Gluconeogenesis	27
GL30680-R1	Carbohydrate metabolism: Glycolysis/Gluconeogenesis		GL30680-R1	Carbohydrate metabolism: Glycolysis/Gluconeogenesis			GL30680-R1	Carbohydrate metabolism: Glycolysis/Gluconeogenesis		GL30680-R1	Carbohydrate metabolism: Glycolysis/Gluconeogenesis
GL24280-R1	Carbohydrate metabolism: Glycolysis/Gluconeogenesis		GL24280-R1	Carbohydrate metabolism: Glycolysis/Gluconeogenesis			GL24280-R1	Carbohydrate metabolism: Glycolysis/Gluconeogenesis		GL24280-R1	Carbohydrate metabolism: Glycolysis/Gluconeogenesis
GL15437-R1	Carbohydrate metabolism: Citrate cycle (TCA cycle)		GL15437-R1	Carbohydrate metabolism: Citrate cycle (TCA cycle)			GL15437-R1	Carbohydrate metabolism: Citrate cycle (TCA cycle)		GL15437-R1	Carbohydrate metabolism: Citrate cycle (TCA cycle)
GL15912-R1	Carbohydrate metabolism: Citrate cycle (TCA cycle)		GL15912-R1	Carbohydrate metabolism: Citrate cycle (TCA cycle)			GL15912-R1	Carbohydrate metabolism: Citrate cycle (TCA cycle)		GL15912-R1	Carbohydrate metabolism: Citrate cycle (TCA cycle)
GL22227-R1	Carbohydrate metabolism: Citrate cycle (TCA cycle)		GL22227-R1	Carbohydrate metabolism: Citrate cycle (TCA cycle)			GL22227-R1	Carbohydrate metabolism: Citrate cycle (TCA cycle)		GL22227-R1	Carbohydrate metabolism: Citrate cycle (TCA cycle)
GL24204-R1	Carbohydrate metabolism: Citrate cycle (TCA cycle)		GL24204-R1	Carbohydrate metabolism: Citrate cycle (TCA cycle)			GL24204-R1	Carbohydrate metabolism: Citrate cycle (TCA cycle)		GL24204-R1	Carbohydrate metabolism: Citrate cycle (TCA cycle)
GL20821-R1	Carbohydrate metabolism: Citrate cycle (TCA cycle)		GL20821-R1	Carbohydrate metabolism: Citrate cycle (TCA cycle)			GL20821-R1	Carbohydrate metabolism: Citrate cycle (TCA cycle)		GL20821-R1	Carbohydrate metabolism: Citrate cycle (TCA cycle)
GL30076-R1	Carbohydrate metabolism: Citrate cycle (TCA cycle)		GL30076-R1	Carbohydrate metabolism: Citrate cycle (TCA cycle)			GL30218-R1	Carbohydrate metabolism: Citrate cycle (TCA cycle)		GL30076-R1	Carbohydrate metabolism: Citrate cycle (TCA cycle)
GL30218-R1	Carbohydrate metabolism: Citrate cycle (TCA cycle)		GL30218-R1	Carbohydrate metabolism: Citrate cycle (TCA cycle)			GL25739-R1	Carbohydrate metabolism: Pentose and glucuronate interconversions		GL30218-R1	Carbohydrate metabolism: Citrate cycle (TCA cycle)
GL25739-R1	Carbohydrate metabolism: Pentose and glucuronate interconversions		GL18437-R1	Carbohydrate metabolism: Pentose and glucuronate interconversions			GL19432-R1	Carbohydrate metabolism: Fructose and mannose metabolism		GL18437-R1	Carbohydrate metabolism: Pentose and glucuronate interconversions
GL19432-R1	Carbohydrate metabolism: Fructose and mannose metabolism		GL25739-R1	Carbohydrate metabolism: Pentose and glucuronate interconversions			GL25424-R1	Carbohydrate metabolism: Fructose and mannose metabolism		GL25739-R1	Carbohydrate metabolism: Pentose and glucuronate interconversions
GL25424-R1	Carbohydrate metabolism: Fructose and mannose metabolism		GL19432-R1	Carbohydrate metabolism: Fructose and mannose metabolism			GL24971-R1	Carbohydrate metabolism: Starch and sucrose metabolism		GL19432-R1	Carbohydrate metabolism: Fructose and mannose metabolism
GL24971-R1	Carbohydrate metabolism: Starch and sucrose metabolism		GL21002-R1	Carbohydrate metabolism: Fructose and mannose metabolism			GL22204-R1	Carbohydrate metabolism: Amino sugar and nucleotide sugar metabolism		GL21002-R1	Carbohydrate metabolism: Fructose and mannose metabolism
GL22204-R1	Carbohydrate metabolism: Amino sugar and nucleotide sugar metabolism		GL25424-R1	Carbohydrate metabolism: Fructose and mannose metabolism			GL18900-R1	Carbohydrate metabolism: Amino sugar and nucleotide sugar metabolism		GL25424-R1	Carbohydrate metabolism: Fructose and mannose metabolism
GL18900-R1	Carbohydrate metabolism: Amino sugar and nucleotide sugar metabolism		GL20928-R1	Carbohydrate metabolism: Fructose and mannose metabolism			GL30088-R1	Carbohydrate metabolism: Amino sugar and nucleotide sugar metabolism		GL20928-R1	Carbohydrate metabolism: Fructose and mannose metabolism
GL30088-R1	Carbohydrate metabolism: Amino sugar and nucleotide sugar metabolism		GL24971-R1	Carbohydrate metabolism: Starch and sucrose metabolism			GL30958-R1	Carbohydrate metabolism: Amino sugar and nucleotide sugar metabolism		GL24971-R1	Carbohydrate metabolism: Starch and sucrose metabolism
GL30958-R1	Carbohydrate metabolism: Amino sugar and nucleotide sugar metabolism		GL26652-R1	Carbohydrate metabolism: Amino sugar and nucleotide sugar metabolism			GL21959-R1	Carbohydrate metabolism: Pyruvate metabolism		GL26652-R1	Carbohydrate metabolism: Amino sugar and nucleotide sugar metabolism
GL21959-R1	Carbohydrate metabolism: Pyruvate metabolism		GL22204-R1	Carbohydrate metabolism: Amino sugar and nucleotide sugar metabolism			GL30390-R1	Carbohydrate metabolism: Inositol Phosphate Metabolism		GL22204-R1	Carbohydrate metabolism: Amino sugar and nucleotide sugar metabolism
GL25661-R1	Carbohydrate metabolism: Pyruvate metabolism		GL18900-R1	Carbohydrate metabolism: Amino sugar and nucleotide sugar metabolism			GL22711-R1	Carbohydrate metabolism: Inositol Phosphate Metabolism		GL18900-R1	Carbohydrate metabolism: Amino sugar and nucleotide sugar metabolism
GL24759-R1	Carbohydrate metabolism: Pyruvate metabolism		GL30088-R1	Carbohydrate metabolism: Amino sugar and nucleotide sugar metabolism			GL17430-R1	Amino acid metabolism: Alanine, aspartate and glutamate metabolism	15	GL30088-R1	Carbohydrate metabolism: Amino sugar and nucleotide sugar metabolism
GL30390-R1	Carbohydrate metabolism: Inositol Phosphate Metabolism		GL30958-R1	Carbohydrate metabolism: Amino sugar and nucleotide sugar metabolism			GL22628-R1	Amino acid metabolism: Alanine, aspartate and glutamate metabolism		GL30958-R1	Carbohydrate metabolism: Amino sugar and nucleotide sugar metabolism
GL22711-R1	Carbohydrate metabolism: Inositol Phosphate Metabolism		GL21959-R1	Carbohydrate metabolism: Pyruvate metabolism			GL24804-R1	Amino acid metabolism: Alanine, aspartate and glutamate metabolism		GL21959-R1	Carbohydrate metabolism: Pyruvate metabolism
GL17430-R1	Amino acid metabolism: Alanine, aspartate and glutamate metabolism	39	GL25661-R1	Carbohydrate metabolism: Pyruvate metabolism			GL30208-R1	Amino acid metabolism: Cysteine and methionine metabolism		GL25661-R1	Carbohydrate metabolism: Pyruvate metabolism
GL24849-R1	Amino acid metabolism: Alanine, aspartate and glutamate metabolism		GL24759-R1	Carbohydrate metabolism: Pyruvate metabolism			GL17247-R1	Amino acid metabolism: Valine, leucine and isoleucine biosynthesis		GL24759-R1	Carbohydrate metabolism: Pyruvate metabolism
GL22628-R1	Amino acid metabolism: Alanine, aspartate and glutamate metabolism		GL30390-R1	Carbohydrate metabolism: Inositol Phosphate Metabolism			GL25070-R1	Amino acid metabolism: Valine, leucine and isoleucine biosynthesis		GL30390-R1	Carbohydrate metabolism: Inositol Phosphate Metabolism
GL24804-R1	Amino acid metabolism: Alanine, aspartate and glutamate metabolism		GL22711-R1	Carbohydrate metabolism: Inositol Phosphate Metabolism			GL30409-R1	Amino acid metabolism: Valine, leucine and isoleucine biosynthesis		GL22711-R1	Carbohydrate metabolism: Inositol Phosphate Metabolism
GL29631-R1	Amino acid metabolism: Alanine, aspartate and glutamate metabolism		GL17430-R1	Amino acid metabolism: Alanine, aspartate and glutamate metabolism	39		GL19834-R1	Amino acid metabolism: Valine, leucine and isoleucine degradation		GL17430-R1	Amino acid metabolism: Alanine, aspartate and glutamate metabolism	24
GL28557-R1	Amino acid metabolism: Alanine, aspartate and glutamate metabolism		GL24849-R1	Amino acid metabolism: Alanine, aspartate and glutamate metabolism			GL20416-R1	Amino acid metabolism: Valine, leucine and isoleucine degradation		GL24849-R1	Amino acid metabolism: Alanine, aspartate and glutamate metabolism
GL24792-R1	Amino acid metabolism: Glycine, serine and threonine metabolism		GL22628-R1	Amino acid metabolism: Alanine, aspartate and glutamate metabolism			GL26714-R1	Amino acid metabolism: Valine, leucine and isoleucine degradation		GL22628-R1	Amino acid metabolism: Alanine, aspartate and glutamate metabolism
GL30208-R1	Amino acid metabolism: Cysteine and methionine metabolism		GL24804-R1	Amino acid metabolism: Alanine, aspartate and glutamate metabolism			GL30148-R1	Amino acid metabolism: Valine, leucine and isoleucine degradation		GL24804-R1	Amino acid metabolism: Alanine, aspartate and glutamate metabolism
GL31360-R1	Amino acid metabolism: Valine, leucine and isoleucine biosynthesis		GL29631-R1	Amino acid metabolism: Alanine, aspartate and glutamate metabolism			GL21166-R1	Amino acid metabolism: Tryptophan metabolism		GL29631-R1	Amino acid metabolism: Alanine, aspartate and glutamate metabolism
GL25971-R1	Amino acid metabolism: Valine, leucine and isoleucine biosynthesis		GL28557-R1	Amino acid metabolism: Alanine, aspartate and glutamate metabolism			GL19819-R1	Amino acid metabolism: Tryptophan metabolism		GL30208-R1	Amino acid metabolism: Cysteine and methionine metabolism
GL26795-R1	Amino acid metabolism: Valine, leucine and isoleucine biosynthesis		GL24792-R1	Amino acid metabolism: Glycine, serine and threonine metabolism			GL28558-R1	Amino acid metabolism: Tryptophan metabolism		GL31360-R1	Amino acid metabolism: Valine, leucine and isoleucine biosynthesis
GL17247-R1	Amino acid metabolism: Valine, leucine and isoleucine biosynthesis		GL30208-R1	Amino acid metabolism: Cysteine and methionine metabolism			GL24381-R1	Amino acid metabolism: Selenocompound metabolism		GL25971-R1	Amino acid metabolism: Valine, leucine and isoleucine biosynthesis
GL25070-R1	Amino acid metabolism: Valine, leucine and isoleucine biosynthesis		GL31360-R1	Amino acid metabolism: Valine, leucine and isoleucine biosynthesis			GL16697-R1	Nucleotide metabolism: Purine metabolism	13	GL26795-R1	Amino acid metabolism: Valine, leucine and isoleucine biosynthesis
GL30409-R1	Amino acid metabolism: Valine, leucine and isoleucine biosynthesis		GL25971-R1	Amino acid metabolism: Valine, leucine and isoleucine biosynthesis			GL29731-R1	Nucleotide metabolism: Purine metabolism		GL17247-R1	Amino acid metabolism: Valine, leucine and isoleucine biosynthesis
GL19834-R1	Amino acid metabolism: Valine, leucine and isoleucine degradation		GL26795-R1	Amino acid metabolism: Valine, leucine and isoleucine biosynthesis			GL16005-R1	Nucleotide metabolism: Purine metabolism		GL25070-R1	Amino acid metabolism: Valine, leucine and isoleucine biosynthesis
GL20416-R1	Amino acid metabolism: Valine, leucine and isoleucine degradation		GL17247-R1	Amino acid metabolism: Valine, leucine and isoleucine biosynthesis			GL15686-R1	Nucleotide metabolism: Purine metabolism		GL30409-R1	Amino acid metabolism: Valine, leucine and isoleucine biosynthesis
GL26714-R1	Amino acid metabolism: Valine, leucine and isoleucine degradation		GL25070-R1	Amino acid metabolism: Valine, leucine and isoleucine biosynthesis			GL18724-R1	Nucleotide metabolism: Purine metabolism		GL19834-R1	Amino acid metabolism: Valine, leucine and isoleucine degradation
GL30148-R1	Amino acid metabolism: Valine, leucine and isoleucine degradation		GL30409-R1	Amino acid metabolism: Valine, leucine and isoleucine biosynthesis			GL23790-R1	Nucleotide metabolism: Purine metabolism		GL20416-R1	Amino acid metabolism: Valine, leucine and isoleucine degradation
GL22111-R1	Amino acid metabolism: Lysine Biosynthesis		GL19834-R1	Amino acid metabolism: Valine, leucine and isoleucine degradation			GL17919-R1	Nucleotide metabolism: Purine metabolism		GL26714-R1	Amino acid metabolism: Valine, leucine and isoleucine degradation
GL30911-R1	Amino acid metabolism: Lysine Biosynthesis		GL20416-R1	Amino acid metabolism: Valine, leucine and isoleucine degradation			GL26666-R1	Nucleotide metabolism: Purine metabolism		GL30148-R1	Amino acid metabolism: Valine, leucine and isoleucine degradation
GL18527-R1	Amino acid metabolism: Lysine Biosynthesis		GL26714-R1	Amino acid metabolism: Valine, leucine and isoleucine degradation			GL31211-R1	Nucleotide metabolism: Pyrimidine metabolism		GL22111-R1	Amino acid metabolism: Lysine Biosynthesis
GL24986-R1	Amino acid metabolism: Arginine and proline metabolism		GL30148-R1	Amino acid metabolism: Valine, leucine and isoleucine degradation			GL30432-R1	Nucleotide metabolism: Pyrimidine metabolism		GL30911-R1	Amino acid metabolism: Lysine Biosynthesis
GL31286-R1	Amino acid metabolism: Histidine metabolism		GL22111-R1	Amino acid metabolism: Lysine Biosynthesis			GL24054-R1	Nucleotide metabolism: Pyrimidine metabolism		GL18527-R1	Amino acid metabolism: Lysine Biosynthesis
GL24642-R1	Amino acid metabolism: Histidine metabolism		GL30911-R1	Amino acid metabolism: Lysine Biosynthesis			GL31659-R1	Nucleotide metabolism: Pyrimidine metabolism		GL24986-R1	Amino acid metabolism: Arginine and proline metabolism
GL17006-R1	Amino acid metabolism: Histidine metabolism		GL18527-R1	Amino acid metabolism: Lysine Biosynthesis			GL24040-R1	Nucleotide metabolism: Pyrimidine metabolism		GL21166-R1	Amino acid metabolism: Tryptophan metabolism
GL21425-R1	Amino acid metabolism: Histidine metabolism		GL24986-R1	Amino acid metabolism: Arginine and proline metabolism			GL19803-R1	Metabolism of cofactors and vitamins: Riboflavin Metabolism	17	GL19819-R1	Amino acid metabolism: Tryptophan metabolism
GL30576-R1	Amino acid metabolism: Histidine metabolism		GL31286-R1	Amino acid metabolism: Histidine metabolism			GL24635-R1	Metabolism of cofactors and vitamins: Riboflavin Metabolism		GL28558-R1	Amino acid metabolism: Tryptophan metabolism
GL24572-R1	Amino acid metabolism: Histidine metabolism		GL24642-R1	Amino acid metabolism: Histidine metabolism			GL30750-R1	Metabolism of cofactors and vitamins: Riboflavin Metabolism		GL24381-R1	Amino acid metabolism: Selenocompound metabolism
GL31316-R1	Amino acid metabolism: Histidine metabolism		GL17006-R1	Amino acid metabolism: Histidine metabolism			GL28091-R1	Metabolism of cofactors and vitamins: Riboflavin Metabolism		GL30348-R1	Energy metabolism: Oxidative Phosphorylation	1
GL21166-R1	Amino acid metabolism: Tryptophan metabolism		GL21425-R1	Amino acid metabolism: Histidine metabolism			GL22808-R1	Metabolism of cofactors and vitamins: Thiamine metabolism		GL16697-R1	Nucleotide metabolism: Purine metabolism	13
GL19819-R1	Amino acid metabolism: Tryptophan metabolism		GL30576-R1	Amino acid metabolism: Histidine metabolism			GL23848-R1	Metabolism of cofactors and vitamins: Thiamine metabolism		GL29731-R1	Nucleotide metabolism: Purine metabolism
GL28558-R1	Amino acid metabolism: Tryptophan metabolism		GL24572-R1	Amino acid metabolism: Histidine metabolism			GL25730-R1	Metabolism of cofactors and vitamins: Thiamine metabolism		GL16005-R1	Nucleotide metabolism: Purine metabolism
GL21175-R1	Amino acid metabolism: Phenylalanine, tyrosine and tryptophan biosynthesis		GL31316-R1	Amino acid metabolism: Histidine metabolism			GL26615-R1	Metabolism of cofactors and vitamins: Nicotinate and nicotinamide metabolism		GL15686-R1	Nucleotide metabolism: Purine metabolism
GL24493-R1	Amino acid metabolism: Phenylalanine, tyrosine and tryptophan biosynthesis		GL21166-R1	Amino acid metabolism: Tryptophan metabolism			GL24452-R1	Metabolism of cofactors and vitamins: Nicotinate and nicotinamide metabolism		GL18724-R1	Nucleotide metabolism: Purine metabolism
GL19278-R1	Amino acid metabolism: Phenylalanine, tyrosine and tryptophan biosynthesis		GL19819-R1	Amino acid metabolism: Tryptophan metabolism			GL24034-R1	Metabolism of cofactors and vitamins: Pantothenate and CoA biosynthesis		GL23790-R1	Nucleotide metabolism: Purine metabolism
GL16921-R1	Amino acid metabolism: Phenylalanine, tyrosine and tryptophan biosynthesis		GL28558-R1	Amino acid metabolism: Tryptophan metabolism			GL24943-R1	Metabolism of cofactors and vitamins: Pantothenate and CoA biosynthesis		GL17919-R1	Nucleotide metabolism: Purine metabolism
GL30664-R1	Amino acid metabolism: Phenylalanine, tyrosine and tryptophan biosynthesis		GL21175-R1	Amino acid metabolism: Phenylalanine, tyrosine and tryptophan biosynthesis			GL31331-R1	Metabolism of cofactors and vitamins: Folate biosynthesis		GL26666-R1	Nucleotide metabolism: Purine metabolism
GL30403-R1	Amino acid metabolism: Phenylalanine, tyrosine and tryptophan biosynthesis		GL24493-R1	Amino acid metabolism: Phenylalanine, tyrosine and tryptophan biosynthesis			GL20807-R1	Metabolism of cofactors and vitamins: Folate biosynthesis		GL31211-R1	Nucleotide metabolism: Pyrimidine metabolism
GL24381-R1	Amino acid metabolism: Selenocompound metabolism		GL19278-R1	Amino acid metabolism: Phenylalanine, tyrosine and tryptophan biosynthesis			GL30256-R1	Metabolism of cofactors and vitamins: Folate biosynthesis		GL30432-R1	Nucleotide metabolism: Pyrimidine metabolism
GL30348-R1	Energy metabolism: Oxidative Phosphorylation	3	GL16921-R1	Amino acid metabolism: Phenylalanine, tyrosine and tryptophan biosynthesis			GL30289-R1	Metabolism of cofactors and vitamins: Folate biosynthesis		GL24054-R1	Nucleotide metabolism: Pyrimidine metabolism
GL20411-R1	Energy metabolism: Oxidative Phosphorylation		GL30664-R1	Amino acid metabolism: Phenylalanine, tyrosine and tryptophan biosynthesis			GL29370-R1	Metabolism of cofactors and vitamins: One carbon pool by folate		GL31659-R1	Nucleotide metabolism: Pyrimidine metabolism
GL18754-R1	Energy metabolism: Oxidative Phosphorylation		GL30403-R1	Amino acid metabolism: Phenylalanine, tyrosine and tryptophan biosynthesis			GL24266-R1	Metabolism of cofactors and vitamins: One carbon pool by folate		GL24040-R1	Nucleotide metabolism: Pyrimidine metabolism
GL16697-R1	Nucleotide metabolism: Purine metabolism	13	GL24381-R1	Amino acid metabolism: Selenocompound metabolism			GL26728-R1	Lipid metabolism: Glycerophospholipid metabolism	18	GL19803-R1	Metabolism of cofactors and vitamins: Riboflavin Metabolism	17
GL29731-R1	Nucleotide metabolism: Purine metabolism		GL30348-R1	Energy metabolism: Oxidative Phosphorylation	3		GL22508-R1	Lipid metabolism: Glycerophospholipid metabolism		GL24635-R1	Metabolism of cofactors and vitamins: Riboflavin Metabolism
GL16005-R1	Nucleotide metabolism: Purine metabolism		GL20411-R1	Energy metabolism: Oxidative Phosphorylation			GL21392-R1	Lipid metabolism: Glycerophospholipid metabolism		GL30750-R1	Metabolism of cofactors and vitamins: Riboflavin Metabolism
GL15686-R1	Nucleotide metabolism: Purine metabolism		GL18754-R1	Energy metabolism: Oxidative Phosphorylation			GL22720-R1	Lipid metabolism: Glycerophospholipid metabolism		GL28091-R1	Metabolism of cofactors and vitamins: Riboflavin Metabolism
GL18724-R1	Nucleotide metabolism: Purine metabolism		GL16697-R1	Nucleotide metabolism: Purine metabolism	13		GL24678-R1	Lipid metabolism: Glycerophospholipid metabolism		GL22808-R1	Metabolism of cofactors and vitamins: Thiamine metabolism
GL23790-R1	Nucleotide metabolism: Purine metabolism		GL29731-R1	Nucleotide metabolism: Purine metabolism			GL21690-R1	Lipid metabolism: Steroid biosynthesis		GL23848-R1	Metabolism of cofactors and vitamins: Thiamine metabolism
GL17919-R1	Nucleotide metabolism: Purine metabolism		GL16005-R1	Nucleotide metabolism: Purine metabolism			GL23376-R1	Lipid metabolism: Steroid biosynthesis		GL25730-R1	Metabolism of cofactors and vitamins: Thiamine metabolism
GL26666-R1	Nucleotide metabolism: Purine metabolism		GL15686-R1	Nucleotide metabolism: Purine metabolism			GL18675-R1	Lipid metabolism: Steroid biosynthesis		GL26615-R1	Metabolism of cofactors and vitamins: Nicotinate and nicotinamide metabolism
GL31211-R1	Nucleotide metabolism: Pyrimidine metabolism		GL18724-R1	Nucleotide metabolism: Purine metabolism			GL23832-R1	Lipid metabolism: Steroid biosynthesis		GL24452-R1	Metabolism of cofactors and vitamins: Nicotinate and nicotinamide metabolism
GL30432-R1	Nucleotide metabolism: Pyrimidine metabolism		GL23790-R1	Nucleotide metabolism: Purine metabolism			GL23074-R1	Lipid metabolism: Steroid biosynthesis		GL24034-R1	Metabolism of cofactors and vitamins: Pantothenate and CoA biosynthesis
GL24054-R1	Nucleotide metabolism: Pyrimidine metabolism		GL17919-R1	Nucleotide metabolism: Purine metabolism			GL16838-R1	Lipid metabolism: Steroid biosynthesis		GL24943-R1	Metabolism of cofactors and vitamins: Pantothenate and CoA biosynthesis
GL31659-R1	Nucleotide metabolism: Pyrimidine metabolism		GL26666-R1	Nucleotide metabolism: Purine metabolism			GL22371-R1	Lipid metabolism: Steroid biosynthesis		GL31331-R1	Metabolism of cofactors and vitamins: Folate biosynthesis
GL24040-R1	Nucleotide metabolism: Pyrimidine metabolism		GL31211-R1	Nucleotide metabolism: Pyrimidine metabolism			GL18323-R1	Lipid metabolism: Steroid biosynthesis		GL20807-R1	Metabolism of cofactors and vitamins: Folate biosynthesis
GL19803-R1	Metabolism of cofactors and vitamins: Riboflavin Metabolism	17	GL30432-R1	Nucleotide metabolism: Pyrimidine metabolism			GL26052-R1	Lipid metabolism: Steroid biosynthesis		GL30256-R1	Metabolism of cofactors and vitamins: Folate biosynthesis
GL24635-R1	Metabolism of cofactors and vitamins: Riboflavin Metabolism		GL24054-R1	Nucleotide metabolism: Pyrimidine metabolism			GL30444-R1	Lipid metabolism: Steroid biosynthesis		GL30289-R1	Metabolism of cofactors and vitamins: Folate biosynthesis
GL30750-R1	Metabolism of cofactors and vitamins: Riboflavin Metabolism		GL31659-R1	Nucleotide metabolism: Pyrimidine metabolism			GL21870-R1	Lipid metabolism: Steroid biosynthesis		GL29370-R1	Metabolism of cofactors and vitamins: One carbon pool by folate
GL28091-R1	Metabolism of cofactors and vitamins: Riboflavin Metabolism		GL24040-R1	Nucleotide metabolism: Pyrimidine metabolism			GL24188-R1	Lipid Metabolism: Fatty acid biosynthesis		GL24266-R1	Metabolism of cofactors and vitamins: One carbon pool by folate
GL22808-R1	Metabolism of cofactors and vitamins: Thiamine metabolism		GL19803-R1	Metabolism of cofactors and vitamins: Riboflavin Metabolism	17		GL30558-R1	Lipid Metabolism: Biosynthesis of saturated fatty acids		GL26728-R1	Lipid metabolism: Glycerophospholipid metabolism	18
GL23848-R1	Metabolism of cofactors and vitamins: Thiamine metabolism		GL24635-R1	Metabolism of cofactors and vitamins: Riboflavin Metabolism			GL24088-R1	Metabolism of terpenoids and polyketides: Terpenoid backbone biosynthesis	5	GL22508-R1	Lipid metabolism: Glycerophospholipid metabolism
GL25730-R1	Metabolism of cofactors and vitamins: Thiamine metabolism		GL30750-R1	Metabolism of cofactors and vitamins: Riboflavin Metabolism			GL17808-R1	Metabolism of terpenoids and polyketides: Terpenoid backbone biosynthesis		GL21392-R1	Lipid metabolism: Glycerophospholipid metabolism
GL26615-R1	Metabolism of cofactors and vitamins: Nicotinate and nicotinamide metabolism		GL28091-R1	Metabolism of cofactors and vitamins: Riboflavin Metabolism			GL25304-R1	Metabolism of terpenoids and polyketides: Terpenoid backbone biosynthesis		GL22720-R1	Lipid metabolism: Glycerophospholipid metabolism
GL24452-R1	Metabolism of cofactors and vitamins: Nicotinate and nicotinamide metabolism		GL22808-R1	Metabolism of cofactors and vitamins: Thiamine metabolism			GL29704-R1	Metabolism of terpenoids and polyketides: Terpenoid backbone biosynthesis		GL24678-R1	Lipid metabolism: Glycerophospholipid metabolism
GL24034-R1	Metabolism of cofactors and vitamins: Pantothenate and CoA biosynthesis		GL23848-R1	Metabolism of cofactors and vitamins: Thiamine metabolism			GL24453-R1	Metabolism of terpenoids and polyketides: Terpenoid backbone biosynthesis		GL21690-R1	Lipid metabolism: Steroid biosynthesis
GL24943-R1	Metabolism of cofactors and vitamins: Pantothenate and CoA biosynthesis		GL25730-R1	Metabolism of cofactors and vitamins: Thiamine metabolism						GL23376-R1	Lipid metabolism: Steroid biosynthesis
GL31331-R1	Metabolism of cofactors and vitamins: Folate biosynthesis		GL26615-R1	Metabolism of cofactors and vitamins: Nicotinate and nicotinamide metabolism						GL18675-R1	Lipid metabolism: Steroid biosynthesis
GL20807-R1	Metabolism of cofactors and vitamins: Folate biosynthesis		GL24452-R1	Metabolism of cofactors and vitamins: Nicotinate and nicotinamide metabolism						GL23832-R1	Lipid metabolism: Steroid biosynthesis
GL30256-R1	Metabolism of cofactors and vitamins: Folate biosynthesis		GL24034-R1	Metabolism of cofactors and vitamins: Pantothenate and CoA biosynthesis						GL23074-R1	Lipid metabolism: Steroid biosynthesis
GL30289-R1	Metabolism of cofactors and vitamins: Folate biosynthesis		GL24943-R1	Metabolism of cofactors and vitamins: Pantothenate and CoA biosynthesis						GL16838-R1	Lipid metabolism: Steroid biosynthesis
GL29370-R1	Metabolism of cofactors and vitamins: One carbon pool by folate		GL31331-R1	Metabolism of cofactors and vitamins: Folate biosynthesis						GL22371-R1	Lipid metabolism: Steroid biosynthesis
GL24266-R1	Metabolism of cofactors and vitamins: One carbon pool by folate		GL20807-R1	Metabolism of cofactors and vitamins: Folate biosynthesis						GL18323-R1	Lipid metabolism: Steroid biosynthesis
GL26728-R1	Lipid metabolism: Glycerophospholipid metabolism	18	GL30256-R1	Metabolism of cofactors and vitamins: Folate biosynthesis						GL26052-R1	Lipid metabolism: Steroid biosynthesis
GL22508-R1	Lipid metabolism: Glycerophospholipid metabolism		GL30289-R1	Metabolism of cofactors and vitamins: Folate biosynthesis						GL30444-R1	Lipid metabolism: Steroid biosynthesis
GL21392-R1	Lipid metabolism: Glycerophospholipid metabolism		GL29370-R1	Metabolism of cofactors and vitamins: One carbon pool by folate						GL21870-R1	Lipid metabolism: Steroid biosynthesis
GL22720-R1	Lipid metabolism: Glycerophospholipid metabolism		GL24266-R1	Metabolism of cofactors and vitamins: One carbon pool by folate						GL24188-R1	Lipid Metabolism: Fatty acid biosynthesis
GL24678-R1	Lipid metabolism: Glycerophospholipid metabolism		GL26728-R1	Lipid metabolism: Glycerophospholipid metabolism	18					GL30558-R1	Lipid Metabolism: Biosynthesis of saturated fatty acids
GL21690-R1	Lipid metabolism: Steroid biosynthesis		GL22508-R1	Lipid metabolism: Glycerophospholipid metabolism						GL24088-R1	Metabolism of terpenoids and polyketides: Terpenoid backbone biosynthesis	5
GL23376-R1	Lipid metabolism: Steroid biosynthesis		GL21392-R1	Lipid metabolism: Glycerophospholipid metabolism						GL17808-R1	Metabolism of terpenoids and polyketides: Terpenoid backbone biosynthesis
GL18675-R1	Lipid metabolism: Steroid biosynthesis		GL22720-R1	Lipid metabolism: Glycerophospholipid metabolism						GL25304-R1	Metabolism of terpenoids and polyketides: Terpenoid backbone biosynthesis
GL23832-R1	Lipid metabolism: Steroid biosynthesis		GL24678-R1	Lipid metabolism: Glycerophospholipid metabolism						GL29704-R1	Metabolism of terpenoids and polyketides: Terpenoid backbone biosynthesis
GL23074-R1	Lipid metabolism: Steroid biosynthesis		GL21690-R1	Lipid metabolism: Steroid biosynthesis						GL24453-R1	Metabolism of terpenoids and polyketides: Terpenoid backbone biosynthesis
GL16838-R1	Lipid metabolism: Steroid biosynthesis		GL23376-R1	Lipid metabolism: Steroid biosynthesis						GL25914-R1	Cytoplasm membrane transport	1
GL22371-R1	Lipid metabolism: Steroid biosynthesis		GL18675-R1	Lipid metabolism: Steroid biosynthesis
GL18323-R1	Lipid metabolism: Steroid biosynthesis		GL23832-R1	Lipid metabolism: Steroid biosynthesis
GL26052-R1	Lipid metabolism: Steroid biosynthesis		GL23074-R1	Lipid metabolism: Steroid biosynthesis
GL30444-R1	Lipid metabolism: Steroid biosynthesis		GL16838-R1	Lipid metabolism: Steroid biosynthesis
GL21870-R1	Lipid metabolism: Steroid biosynthesis		GL22371-R1	Lipid metabolism: Steroid biosynthesis
GL24188-R1	Lipid Metabolism: Fatty acid biosynthesis		GL18323-R1	Lipid metabolism: Steroid biosynthesis
GL30558-R1	Lipid Metabolism: Biosynthesis of saturated fatty acids		GL26052-R1	Lipid metabolism: Steroid biosynthesis
GL24088-R1	Metabolism of terpenoids and polyketides: Terpenoid backbone biosynthesis	5	GL30444-R1	Lipid metabolism: Steroid biosynthesis
GL17808-R1	Metabolism of terpenoids and polyketides: Terpenoid backbone biosynthesis		GL21870-R1	Lipid metabolism: Steroid biosynthesis
GL25304-R1	Metabolism of terpenoids and polyketides: Terpenoid backbone biosynthesis		GL24188-R1	Lipid Metabolism: Fatty acid biosynthesis
GL29704-R1	Metabolism of terpenoids and polyketides: Terpenoid backbone biosynthesis		GL30558-R1	Lipid Metabolism: Biosynthesis of saturated fatty acids
GL24453-R1	Metabolism of terpenoids and polyketides: Terpenoid backbone biosynthesis		GL24088-R1	Metabolism of terpenoids and polyketides: Terpenoid backbone biosynthesis	5
GL23319-R1	Cytoplasm membrane transport	1	GL17808-R1	Metabolism of terpenoids and polyketides: Terpenoid backbone biosynthesis
			GL25304-R1	Metabolism of terpenoids and polyketides: Terpenoid backbone biosynthesis
			GL29704-R1	Metabolism of terpenoids and polyketides: Terpenoid backbone biosynthesis
			GL24453-R1	Metabolism of terpenoids and polyketides: Terpenoid backbone biosynthesis
			GL23319-R1	Cytoplasm membrane transport	2
			GL25914-R1	Cytoplasm membrane transport
